# Supplementary material
Source: publisher site journal article supplement (https://www.spandidos-publications.com/6394/downloadSupplementary)
Supplement: Supplementary file 1 [file downloadSupplementary]

## Sheet: Supplementary Table 4
Table SIV. Differentially regulated metabolites between patients with AAONFH and NCs in positive-ion mode and negative-ion mode.
ID	AONFH_1	AONFH_11	AONFH_12	AONFH_13	AONFH_14	AONFH_15	AONFH_16	AONFH_17	AONFH_18	AONFH_19	AONFH_2	AONFH_20	AONFH_21	AONFH_22	AONFH_23	AONFH_24	AONFH_25	AONFH_26	AONFH_27	AONFH_28	AONFH_29	AONFH_3	AONFH_30	AONFH_31	AONFH_32	AONFH_33	AONFH_34	AONFH_35	AONFH_36	AONFH_37	AONFH_38	AONFH_39	AONFH_4	AONFH_40	AONFH_41	AONFH_42	AONFH_43	AONFH_44	AONFH_45	AONFH_46	AONFH_47	AONFH_48	AONFH_49	AONFH_5	AONFH_50	AONFH_6	AONFH_7	AONFH_8	AONFH_9
neg-0.861_399.10625	749239	193387	198435	546086	661026	218997	167193	223703	209061	9.15498e+06	754786	182983	929071	189702	152474	130336	485220	406851	739859	2.60957e+06	216509	1.36983e+06	398356	245379	178313	3.42389e+06	203934	676735	336439	524138	279000	210860	382150	312857	209889	283380	620078	238758	232997	226178	175538	191430	268301	246357	873486	297382	263068	3.41875e+06	615284
neg-0.863_380.10893	4.21408e+06	1.31026e+06	1.53918e+06	4.43821e+06	4.62799e+06	1.50348e+06	1.546e+06	1.54955e+06	2.47191e+06	1.1498e+07	4.864e+06	5.66541e+06	5.19267e+06	1.49437e+06	1.93576e+06	1.22859e+06	5.81976e+06	3.56266e+06	1.49217e+06	1.80253e+07	3.8467e+06	6.47917e+06	7.95034e+06	1.63762e+06	2.65239e+06	2.42867e+06	5.88053e+06	2.82816e+06	1.1962e+06	5.35986e+06	4.73149e+06	1.02078e+06	1.27544e+06	5.54204e+06	3.12659e+06	4.01938e+06	2.48016e+06	749664	2.37542e+06	2.52873e+06	3.25675e+06	3.13539e+06	1.84554e+06	4.22403e+06	1.21385e+06	1.94656e+06	4.59013e+06	5.84987e+06	2.89828e+06
neg-0.871_345.00245	586972	408384	3.47261e+08	1.74231e+06	439307	463252	433222	619440	761435	2.85165e+06	566894	386412	412081	444321	321986	399394	603379	559756	520688	3.44826e+07	457211	2.66438e+06	4.79863e+06	2.08661e+06	376552	543632	7.39849e+06	636887	619109	420370	589176	4.91028e+06	493477	660673	443230	491816	370358	651719	492029	523195	848623	8.35577e+06	566582	520242	9.31006e+06	5.03597e+07	382405	481283	411141
neg-0.872_296.06801	257249	212222	217761	200611	207210	471628	231314	234628	192773	495521	420107	2.83758e+07	151757	189260	157104	132213	255961	271569	234532	105494	1.00332e+06	557865	452757	248579	811491	308508	236992	237890	196471	101868	285932	347831	218990	343328	464434	168603	148983	289679	212519	201916	184633	205320	228187	208266	624759	339825	184233	211367	199301
neg-0.885_150.01642	726298	2.90257e+06	423565	2.7512e+06	1.21285e+06	2.85067e+06	1.19993e+07	6.81159e+06	1.04247e+06	8.31215e+06	676798	1.91884e+06	6.52465e+06	472394	1.66723e+06	1.29716e+06	1.57069e+06	298096	299181	1.11139e+06	9.08046e+06	356572	8.33878e+06	3.28123e+06	1.09989e+06	484721	1.40658e+06	852237	2.92485e+06	1.60235e+06	2.08926e+06	2.50495e+06	1.53515e+07	1.58418e+06	886541	962210	3.16615e+06	716902	501311	404717	7.19354e+06	1.87173e+06	3.46681e+06	6.4192e+06	1.78751e+06	8.90635e+06	670355	3.33236e+06	7.76956e+06
neg-0.904_386.14322	1.92733e+06	951518	971969	4.68993e+06	809322	1.47579e+06	1.36633e+06	1.46199e+06	1.0789e+07	1.21959e+06	1.3476e+06	5.28324e+06	1.68236e+06	2.19754e+06	1.86605e+06	898388	1.69294e+06	551798	1.52307e+06	925652	1.49842e+07	657315	1.16626e+06	2.30294e+06	556269	2.14914e+06	2.18557e+06	1.64084e+06	762913	3.02854e+07	768504	3.59109e+06	2.56956e+06	763739	1.15094e+06	1.43631e+06	950571	647168	2.10256e+06	1.2248e+06	1.30911e+06	3.32644e+06	1.41607e+06	1.21813e+06	4.97615e+06	766232	1.59113e+06	2.44542e+06	1.45184e+06
neg-0.909_404.15472	2.19486e+06	297129	4.41135e+06	317915	2.92652e+06	2.68922e+06	1.23265e+06	535224	4.42596e+06	745847	3.51413e+06	739998	2.65046e+06	1.11027e+06	2.73604e+06	3.63122e+06	605783	420343	2.28823e+06	1.14365e+06	925100	339655	672928	469749	590499	1.19429e+06	1.2528e+06	1.25701e+06	3.71135e+06	963056	858516	709957	3.81976e+06	1.05357e+06	2.50812e+06	1.42911e+06	2.60209e+06	422909	2.20476e+06	3.20378e+06	495369	1.86071e+06	6.05785e+06	3.24645e+06	445847	260111	471623	1.39835e+06	238479
neg-0.921_480.1234	212490	3.52705e+06	400296	289389	547891	287306	206943	483544	1.28135e+06	494336	275181	1.03483e+06	277275	158148	1.13994e+06	541468	162987	263186	253958	873364	217148	529462	429017	199178	1.20276e+06	185356	232729	184623	171660	2.74996e+06	284080	354460	195858	297231	179851	137830	473066	170832	172603	307907	1.397e+06	1.76721e+06	1.63066e+06	284950	256373	467674	507293	254967	248860
neg-0.922_424.17025	2.36932e+06	2.01988e+06	5.24767e+06	883185	3.49481e+06	9.70272e+06	2.74171e+06	1.17973e+06	7.54623e+06	2.27954e+06	4.07156e+06	2.58253e+06	6.90425e+06	4.65115e+06	2.35642e+06	9.57155e+06	3.10001e+06	1.08773e+06	3.72189e+06	2.20486e+06	5.13097e+06	1.35781e+06	1.60248e+07	1.6101e+06	736807	1.24462e+06	8.69229e+06	2.37382e+06	5.71582e+06	2.82574e+06	1.57138e+07	915497	2.84834e+06	2.51513e+07	2.52164e+06	8.4288e+06	5.96872e+06	9.95463e+06	6.78299e+06	6.61314e+06	1.21443e+06	4.50455e+06	1.06293e+07	1.16471e+07	2.95941e+06	1.31716e+06	2.38532e+06	1.74303e+06	905868
neg-0.928_157.07398	2.5914e+07	1.0976e+08	5.72867e+07	6.91533e+07	4.46788e+07	4.57818e+08	1.49544e+08	2.63379e+07	4.74485e+08	7.44274e+07	1.78109e+08	7.23905e+07	3.62e+08	1.48702e+08	7.50959e+07	4.99195e+08	5.69494e+07	1.66864e+07	4.86969e+07	5.6463e+07	2.74796e+08	5.6037e+07	3.0964e+07	3.08032e+07	5.98797e+07	6.27468e+07	2.52941e+08	5.54627e+07	1.18646e+08	1.65856e+08	1.05086e+08	4.66018e+07	1.63656e+08	4.25224e+08	177177537	2.9578e+08	3.70403e+08	4.9476e+07	1.90449e+08	7.33198e+07	3.12577e+07	2.77308e+08	5.80862e+08	5.44304e+08	2.61794e+08	3.97315e+07	1.22225e+08	136928966	4.59374e+07
neg-0.932_203.07941	2.54918e+07	1.12616e+08	6.1476e+07	2.09259e+07	4.30818e+07	4.6549e+08	1.52449e+08	2.02956e+07	4.83524e+08	7.79312e+07	1.6836e+08	9.43759e+07	3.72884e+08	1.50756e+08	7.15291e+07	5.04776e+08	5.4813e+07	1.70244e+07	8.43697e+07	4.13191e+07	2.84823e+08	5.00567e+07	1.48515e+07	3.63709e+07	5.92834e+07	6.61517e+07	2.45921e+08	1.13261e+07	1.23846e+08	1.58326e+08	1.07187e+08	5.7884e+07	1.67165e+08	4.2623e+08	181781478	2.97405e+08	3.72824e+08	6.02464e+07	1.93503e+08	7.26783e+07	3.98794e+07	282726624	5.98283e+08	543581155	2.53302e+08	3.28011e+07	1.159e+08	5.10188e+07	3.13805e+07
neg-0.937_527.18532	148411	261971	152259	180573	414809	1.87007e+06	160106	136764	7.3615e+06	206636	231871	176201	629228	107877	365997	1.28505e+06	133750	220854	227586	126503	190571	229828	224245	216817	138693	173148	189114	120337	375527	459089	240426	153276	224452	249201	168005	166437	501749	159580	731293	136133	173035	1.41852e+06	4.67619e+06	853620	239487	158388	143918	144246	202116
neg-0.94_403.16008	343487	606531	3.10741e+06	341583	733938	2.76817e+06	459618	538078	2.24433e+06	281401	350145	377627	1.97987e+06	438191	346918	3.31653e+06	336026	395640	1.32143e+06	1.04398e+06	1.09642e+06	431549	525552	405853	1.28372e+06	595890	821250	1.16539e+06	2.79238e+06	759560	640429	650996	491268	1.00508e+06	879211	974210	1.78971e+06	7.20845e+06	533410	417966	2.30922e+06	973384	5.3093e+06	2.70008e+06	692830	433159	1.03354e+06	251501	484837
neg-0.944_303.00502	251016	333189	162479	286988	405725	6.81944e+06	1.64984e+06	340238	9.90284e+06	2.13919e+06	2.60276e+06	751734	3.26214e+06	1.20822e+06	634466	7.58561e+06	1.13036e+06	353157	196168	198602	4.18676e+06	215522	238116	806092	559106	3.26922e+06	2.65634e+06	140913	3.35123e+06	1.04429e+06	255299	1.00238e+06	642567	4.2144e+06	1.64038e+06	2.60369e+06	2.22212e+06	357053	2.79816e+06	480581	183739	6.263e+06	6.75501e+06	4.13647e+06	2.38946e+06	615437	1.35632e+06	255213	177034
neg-0.961_132.0059	274498	226978	290751	295344	174762	188441	221751	240284	234012	223176	249229	338504	150773	193482	155335	217932	292337	302817	367616	192649	312687	418445	398704	206073	305572	238015	275372	241399	248567	294376	463622	248419	323000	486184	414436	185563	503571	351057	225711	209345	464629	234242	283512	268297	397989	201767	222854	250560	334924
neg-0.975_143.05824	9.8944e+07	2.74307e+08	8.6182e+07	2.65753e+08	1.20446e+08	6.49127e+08	1.83781e+08	1.90173e+08	5.23529e+08	2.19208e+08	2.16652e+08	491225495	4.83011e+08	1.79759e+08	1.194e+08	6.42996e+08	9.67632e+07	4.47698e+07	138725175	1.65811e+08	707558273	2.92799e+08	9.94572e+07	1.565e+08	5.32915e+08	1.05112e+08	2.74051e+08	4.85745e+07	3.2588e+08	2.86501e+08	2.27293e+08	3.56207e+08	2.56155e+08	5.2045e+08	2.40199e+08	3.4839e+08	447279100	1.39158e+08	2.34221e+08	1.50562e+08	3.44233e+08	305022100	7.55527e+08	7.84928e+08	6.00053e+08	1.1532e+08	2.1855e+08	2.20225e+08	343029972
neg-0.991_189.00973	189236	753942	239171	373648	1.73456e+06	1.40416e+06	1.52037e+06	430715	218773	668162	1.59762e+07	1.10468e+07	133229	180544	185129	309970	187543	681985	3.43372e+06	139111	244788	573359	449446	2.06201e+06	462684	467134	365327	184790	262947	169739	410985	393430	151259	962980	282120	208890	178992	208205	908309	172786	389743	238884	330247	2.01526e+06	235442	335633	194580	164235	784129
neg-1.032_163.02715	677115	4.77661e+06	789422	8.76699e+06	681643	1.116e+07	594959	813886	9.19093e+06	762872	7.99302e+07	3.59715e+06	361198	405581	345326	6.66915e+06	6.99516e+06	1.0017e+06	1.3748e+06	639918	1.40742e+07	983216	1.95144e+06	2.5631e+06	1.965e+06	6.7479e+07	1.07654e+06	1.01096e+06	8.49357e+06	1.20987e+06	901559	1.40063e+07	608372	742764	812052	558228	5.33185e+06	9.10954e+06	734355	510498	2.7348e+06	1.06387e+07	4.35783e+06	4.16842e+06	708067	1.69146e+07	524818	684376	636919
neg-1.048_203.07947	5.73381e+06	4.6801e+06	3.07338e+06	2.76203e+07	1.85242e+07	163617519	5.41462e+07	1.14817e+07	1.99667e+08	3.35026e+07	7.14557e+07	4.68715e+07	1.3129e+08	2.60543e+07	3.66291e+07	1.7034e+08	1.56967e+07	7.96938e+06	3.60943e+06	2.78683e+07	1.07826e+08	1.72575e+07	3.8481e+06	9.33329e+06	1.1577e+07	1.97805e+07	5.2159e+07	5.86121e+06	5.17927e+07	4.01006e+07	1.45379e+07	2.17758e+07	4.32788e+07	1.20695e+08	4.07128e+07	9.84159e+07	1.42394e+08	3.67246e+06	4.39726e+07	3.27163e+07	2.80836e+07	126317335	2.34699e+08	1.3738e+08	6.73238e+07	3.09478e+06	4.54334e+07	4.16219e+06	3.86325e+06
neg-1.128_158.90821	611261	533923	1.45338e+06	148058	780165	1.06962e+06	351330	479656	288536	233179	133097	322633	390499	5.09194e+06	463928	864470	911091	115687	309024	329013	1.49414e+06	583225	4.59959e+06	1.09284e+06	1.22921e+06	252878	185649	1.38063e+06	1.5618e+06	164440	2.42624e+06	1.5709e+06	108170	2.86509e+06	1.69633e+06	264079	581787	406047	154570	127981	578236	221690	286496	198055	3.68931e+06	843492	349124	127117	1.13036e+07
neg-1.386_437.16402	839320	355904	747266	224330	1.47419e+06	289009	1.00255e+06	346560	1.06244e+06	268026	1.60625e+06	1.48004e+06	884797	480909	1.4707e+06	119424	448079	124927	1.5777e+06	97703.5	251863	214798	708536	94463.2	136721	572497	386235	292542	790601	401497	596075	152033	1.05105e+06	317406	510821	538713	311629	141538	1.10505e+06	1.98214e+06	368508	242748	624755	321327	233257	638754	323021	739043	354826
neg-1.388_490.19042	188300	140334	163755	165450	140750	222872	119749	232556	685882	145605	251431	169046	134694	130124	128431	99576.4	758499	179181	212735	120985	229724	267541	334997	148927	242892	202686	299636	1.20339e+06	149252	472793	293191	188260	155176	174203	169509	92460.3	137072	176931	162800	138914	205139	258909	193966	266824	346096	145486	179700	230506	399445
neg-1.389_208.09496	334008	2.09959e+06	766618	802786	194997	606463	271026	279244	2.08981e+06	473006	348494	3.31585e+06	514634	158870	297349	591141	189212	235724	394861	809282	1.94847e+06	485735	400228	179434	514870	325044	357981	301290	178314	890296	364044	1.24481e+06	497441	303923	202516	882480	256170	349966	281470	267273	769983	556062	418811	772071	433845	272257	500344	615774	497271
neg-1.389_419.15485	238146	263682	340218	105579	250179	311503	745263	210088	720348	211318	160857	83849.1	330210	47953.9	993051	408322	234190	97865.7	636742	234941	197929	132704	485206	167070	120477	250223	330806	210655	726237	355478	151140	98568.5	888135	93857.5	262634	132906	154068	88372	445598	447134	285947	83452.9	332576	141283	143268	415730	146749	285186	111318
neg-1.39_200.07968	2.12379e+06	1.14408e+07	1.11702e+07	2.233e+06	1.14315e+06	4.51949e+06	5.65205e+06	1.09299e+07	2.57447e+07	2.0918e+06	1.162e+06	7.39086e+06	1.28285e+06	5.17399e+06	2.22863e+06	1.91239e+06	4.00735e+06	903595	6.29179e+06	4.67183e+06	4.18726e+06	4.03483e+06	3.23345e+06	3.1282e+06	3.4409e+06	9.5129e+06	728938	3.55957e+06	4.49978e+06	5.36721e+07	1.28217e+07	1.40792e+07	1.75451e+06	3.45882e+06	5.85254e+06	5.05276e+06	4.5103e+06	8.01166e+06	1.95919e+06	2.07587e+06	4.65697e+06	9.62275e+06	3.44208e+06	6.22544e+06	1.13087e+07	1.9781e+06	5.86753e+06	5.13251e+06	3.95883e+06
neg-1.399_400.15874	758562	3.47784e+06	7.66623e+06	1.23898e+06	1.00734e+06	1.94802e+06	577188	6.42722e+06	2.99524e+07	1.41019e+06	606752	1.0193e+07	1.00128e+06	3.21105e+06	848274	385422	1.50168e+06	389611	632607	413284	993501	704107	904405	858179	661867	9.88013e+06	653213	4.74241e+06	717178	6.91236e+07	722237	1.05865e+07	527409	373654	1.98492e+06	1.04499e+06	1.22776e+06	351816	964878	551200	2.34123e+06	1.05984e+07	730312	1.61996e+06	5.62447e+06	1.69444e+06	5.33738e+06	877157	2.74469e+06
neg-1.41_332.17068	1.03335e+06	3.07955e+06	7.61164e+06	712525	819361	812116	902757	4.91118e+06	2.21262e+07	846009	319453	5.18435e+06	986577	2.35122e+06	771664	297136	2.74434e+06	294632	913469	272032	377167	456704	416825	699107	562862	7.63805e+06	637291	3.87363e+06	442711	5.15462e+07	3.81642e+06	7.80364e+06	674947	699403	1.49152e+06	805489	2.05654e+06	1.29888e+06	1.05081e+06	1.05362e+06	1.62099e+06	8.49289e+06	336366	1.2323e+06	4.50967e+06	1.43617e+06	5.05975e+06	1.11599e+06	2.81241e+06
neg-1.43_442.16939	133461	283775	502849	163438	73175.8	206688	100619	662086	8.49024e+06	197194	99563.9	693366	90651.9	311433	211654	89996.8	294411	174990	262919	92226.2	146045	182334	158783	155999	226279	1.01336e+06	259534	438920	98757.4	1.99051e+07	208495	1.10178e+06	62845.1	167257	185984	66403.8	110564	108983	122843	122875	160693	1.23138e+06	197768	141970	672794	109924	500212	108004	376279
neg-1.439_185.06892	627478	251360	124127	702229	517457	2.01046e+06	486574	432033	2.26911e+06	1.16009e+06	802795	1.29366e+06	1.34275e+06	282681	741814	1.26246e+06	213584	515310	255895	1.02221e+06	1.69972e+06	87916.5	1.05527e+06	855104	673571	810892	457905	1.01192e+06	918959	1.10922e+06	641120	789296	718505	977543	166224	845945	1.44504e+06	198213	728620	286043	646452	1.23997e+06	3.05419e+06	1.26333e+06	898380	147863	317107	590961	263126
neg-1.441_303.00506	275356	9.52196e+06	7.05478e+06	1.21084e+06	8.94846e+06	7.1205e+07	3.52119e+07	2.52141e+06	1.28628e+08	1.78927e+07	2.88416e+07	6.15805e+06	6.89809e+07	1.75583e+07	1.67677e+07	8.70259e+07	7.22509e+06	1.57315e+06	2.0657e+06	3.35622e+06	4.89325e+07	1.8953e+06	268399	4.34715e+06	5.00302e+06	1.19641e+07	2.41735e+07	230396	2.26707e+07	1.90431e+07	225772	2.75486e+06	2.07398e+07	6.68305e+07	1.80464e+07	4.93861e+07	8.5221e+07	698175	3.15579e+07	1.86003e+07	777853	7.61971e+07	1.11984e+08	8.22784e+07	3.40764e+07	219408	1.39496e+07	938137	3.06525e+06
neg-1.444_345.98651	73391.2	177530	258885	218104	317392	1.75805e+06	718013	198575	1.84216e+06	571944	910346	390099	1.41106e+06	1.19111e+06	232038	1.72711e+06	280052	1.23529e+06	886770	109982	1.27456e+06	328505	1.3836e+06	91504.8	134896	413521	136523	101138	758807	173972	465581	207617	540368	2.01295e+06	466924	700977	977348	70299.3	1.37093e+06	1.08493e+06	187016	3.22721e+06	2.3413e+06	1.85277e+06	1.04264e+06	798757	587748	155030	389336
neg-1.448_157.07394	5.68452e+06	1.02437e+08	7.73808e+07	1.90324e+07	7.62354e+07	6.81478e+08	2.99404e+08	2.53729e+07	1090767136	1.53062e+08	2.85739e+08	7.28497e+07	5.64385e+08	142983847	1.61637e+08	850210222	7.18492e+07	1.75704e+07	8.54208e+06	3.64087e+07	384687858	2.76896e+07	2.2882e+06	4.37446e+07	5.09588e+07	1.00161e+08	1.89697e+08	2.67734e+06	1.94375e+08	1.83486e+08	8.08669e+06	2.80448e+07	1.95762e+08	7.91129e+08	1.3826e+08	4.34104e+08	8.43632e+08	1.28797e+07	2.48776e+08	1.43997e+08	1.11737e+07	638522769	1215019057	7.00838e+08	3.0685e+08	1.56879e+07	1.50788e+08	1.01781e+07	4.30591e+07
neg-1.452_406.15917	43242.7	161992	1.51197e+06	89642.5	73553.2	7.76606e+06	1.5206e+06	82718.1	1.66859e+07	316782	980192	75589.6	7.16221e+06	556367	924256	1.45985e+07	92137.6	196200	279125	135111	2.28765e+06	95435	108308	237412	47565.1	125992	650449	75385.6	690899	852151	291173	74300.3	64363.6	3.94489e+06	333873	291499	1.13391e+07	58812.5	243730	370661	219038	5.04205e+06	2.09949e+07	7.16209e+06	1.10088e+06	76627.8	241832	47231.3	107577
neg-1.46_359.06251	33776	66223.4	168074	56735.5	165974	85516.8	1.19408e+06	66101.9	121120	70687.1	83554.7	45040.1	535427	580274	50102.6	96664.4	54722.4	230941	220521	65608.9	144366	87650.8	90826.1	65458.4	61957.8	64696.7	107873	53117.4	131187	78296.6	62237.7	44565	52333.1	1.97123e+06	383248	250533	113047	45651.2	1.00848e+06	147552	52419.2	91609.8	1.11295e+06	1.96274e+06	278054	54232.7	203606	42201.4	118657
neg-1.46_547.08685	42588.1	83500.9	86645	72925.8	75521.3	792465	124491	85938.5	1.98362e+06	247853	953290	76240.4	698195	95109.2	204749	1.62215e+06	78548.7	227855	278055	82726.2	116119	110519	126294	82536.4	78122.5	65158.2	714540	67543.1	104211	98724	81735.5	77418	75258.3	98102.4	124343	195610	441436	76464.2	139757	133376	88494.7	519869	1.18242e+06	1.35776e+06	88761.8	76944	103508	69019.6	135853
neg-1.468_304.00576	42713.6	872873	571631	67927.3	814298	6.30374e+06	4.12386e+06	124034	1.43948e+07	1.33032e+06	2.45414e+06	315404	7.37727e+06	1.92343e+06	1.85068e+06	9.61669e+06	485527	216355	302214	419669	4.18127e+06	137702	119920	126460	332451	856249	2.26169e+06	63595.5	1.81393e+06	2.23044e+06	95691.7	231336	172119	5.33642e+06	1.23241e+06	5.51476e+06	1.01873e+07	72605.2	3.51078e+06	2.06844e+06	84028.5	7.96747e+06	1.26521e+07	8.9164e+06	3.31263e+06	76827.5	1.39821e+06	487646	312855
neg-1.472_203.07941	3.04229e+06	1.02207e+08	7.62335e+07	1.98584e+07	7.57603e+07	684957848	3.00289e+08	2.44948e+07	1101199022	1.52435e+08	2.85164e+08	7.23166e+07	5.69823e+08	1.4244e+08	1.61945e+08	8.57846e+08	7.04377e+07	1.66263e+07	1.48986e+07	3.54556e+07	3.85576e+08	2.14628e+06	2.07028e+06	4.28929e+07	2.62128e+06	9.83907e+07	1.8928e+08	2.35712e+06	1.93257e+08	1.84134e+08	938263	2.69637e+07	1.94708e+08	7.91311e+08	1.37034e+08	4.37595e+08	8.50495e+08	3.94253e+06	2.48706e+08	1.43296e+08	4.15887e+06	6.38161e+08	2.95327e+07	7.0498e+08	305785331	1.50627e+07	1.49876e+08	1.63498e+07	4.24786e+07
neg-1.512_253.05878	107826	229469	314231	341177	166099	459292	237168	231418	258745	1.55365e+06	113611	316782	238700	195059	271360	176156	123234	385366	1.86498e+06	229528	2.09665e+06	575949	326451	249783	356371	304203	226888	154549	307947	331023	186101	7.60466e+06	152572	865413	263486	604324	276756	265479	246244	330251	296054	378034	5.36627e+06	267332	447958	258538	414268	197220	371713
neg-1.547_248.08985	180622	386145	266642	350392	460499	459558	201250	4.68834e+06	342006	4.15255e+06	290870	295620	221798	165518	265645	326783	198030	327003	328469	409704	1.40466e+06	317775	277011	216853	2.3195e+06	692230	146479	144291	235159	482798	189246	311296	159621	190855	223582	882372	228506	225273	208951	345479	251217	768978	158657	177705	380116	219383	228397	295026	426312
neg-1.572_362.13295	856748	313573	909297	454444	1.23241e+06	533548	1.51199e+06	326912	3.37395e+06	5.80167e+06	677574	398106	5.00344e+06	496066	3.15955e+06	2.54601e+06	826568	511588	749997	332167	969702	4.0471e+06	503555	646722	434296	898354	1.62638e+06	223659	1.13198e+06	631799	2.07586e+06	469518	2.07955e+06	2.84001e+06	411692	1.54948e+06	2.81097e+06	312086	367505	951078	759358	1.8037e+06	927489	9.75356e+06	557509	545710	1.55104e+06	756248	327180
neg-1.767_223.0482	792746	1.71942e+07	1.89248e+06	2.20043e+07	247128	2.45359e+07	73099.8	484367	2.41809e+07	1.61595e+06	1.72592e+08	4.58967e+06	178355	97394.9	783977	1.1839e+07	1.1618e+07	178262	467579	202814	2.59377e+07	1.29321e+06	1.00564e+06	6.13409e+06	4.45223e+06	1.35148e+08	108920	1.01082e+06	2.26877e+07	2.35566e+06	115463	2.13079e+07	152795	153617	89603.9	2.16473e+06	1.19876e+07	1.24762e+07	175742	177137	4.58213e+06	2.8584e+07	5.15819e+06	7.21271e+06	88376.9	1.72974e+07	150310	1.00044e+06	85509
neg-1.771_322.97376	67949.8	870717	69038.2	1.2916e+06	85074.8	2.09417e+06	73076.4	65069.9	1.82839e+06	123813	1.53643e+07	326402	44877.5	64152.7	61160.9	682279	1.12229e+06	121251	235367	50058.4	1.77538e+06	78994.8	162262	370419	224193	1.21375e+07	52899.1	70251	1.67273e+06	105974	115426	1.7675e+06	57349	122971	95800.5	217931	1.20882e+06	1.03738e+06	104064	96413.8	351809	2.84901e+06	444107	430668	88348.6	2.3302e+06	61799.3	66979.8	74839.1
neg-1.772_387.08624	268969	167856	354355	158468	222817	972204	427939	88985.9	1.78373e+06	280947	673201	179614	1.0828e+06	320408	438103	1.64253e+06	141195	422560	505960	186026	1.00536e+06	185613	367668	188914	304523	85683.1	272094	190432	216931	488359	225522	125205	776960	759788	367287	555943	3.8015e+06	293252	245155	432292	182244	711470	1.14844e+06	1.92248e+06	860076	122360	833168	524450	562248
neg-1.777_163.02712	944256	2.02354e+07	2.47714e+06	2.74607e+07	610242	3.08672e+07	292973	1.11399e+06	3.05382e+07	2.60147e+06	2.17579e+08	5.6526e+06	569933	150651	1.60157e+06	1.47997e+07	1.48335e+07	240523	769287	1.47125e+06	3.30099e+07	1.67314e+06	1.35686e+06	7.51743e+06	5.42989e+06	1.68401e+08	972884	1.56029e+06	2.88033e+07	3.10582e+06	177377	2.69626e+07	267988	235631	314677	3.01864e+06	1.57958e+07	1.64193e+07	221015	655668	5.67851e+06	3.61666e+07	6.46098e+06	8.97879e+06	354541	2.30652e+07	276248	1.31066e+06	179930
neg-1.831_271.06974	65328.3	523629	108687	1.12715e+06	90965.9	158947	88021.3	280982	457333	480593	55075.7	576150	336135	98456	104032	361962	54027.3	61451.3	339404	58386.5	583820	152115	125964	150759	986038	295759	157528	120581	98352	493759	68157.4	842454	81722.8	66057.8	158324	268040	370407	66236.5	97006.7	231273	307224	237511	247169	115091	70330.3	113226	157989	136104	245750
neg-2.772_262.98567	1.09636e+06	1.80451e+06	2.78012e+06	322575	1.22202e+07	1.65002e+07	4.60098e+07	3.12504e+06	1.83015e+07	3.41633e+06	6.5839e+06	882866	2.66773e+06	700397	823148	9.18608e+06	6.3948e+06	7.42506e+06	663044	4.94801e+06	98935.5	2.91684e+06	429851	6.14594e+07	316381	3.1739e+07	8.23888e+06	3.74086e+06	6.45968e+06	1.63847e+07	462815	492583	2.38191e+06	1.20355e+08	2.60688e+06	2.91533e+06	1.2771e+06	8.17221e+06	1.18704e+06	2.66028e+07	127728	2.97638e+06	6.41045e+06	4.49411e+07	2.0875e+08	4.35825e+07	1.62527e+07	5.70706e+06	1.74029e+07
neg-2.818_234.10419	54326.1	70512.3	79601.5	5.49112e+06	60335.5	530968	5.12834e+06	657114	62622.9	99376.1	80133.5	120794	48005.5	1.38275e+06	96170.6	1.95332e+06	49155.4	814807	1.01973e+06	2.17155e+06	95054.7	174316	189266	103144	152331	163632	68450	61377.6	80784.9	54951.7	276631	108844	73414.7	447305	57755.4	47510.9	47685.3	60112.5	54116.5	67350.4	79313.2	185547	71955.7	158202	74679.8	64160.4	1.12793e+06	61596	703597
neg-2.82_163.02711	2.45437e+06	5.34626e+07	2.585e+06	1.41026e+06	7.99621e+06	2.4776e+06	1.83771e+06	4.44665e+06	1.37465e+06	1.81101e+07	7.20576e+06	1.16808e+07	2.24714e+06	877556	2.88689e+06	6.32238e+06	1.492e+06	2.09274e+06	2.59984e+06	1.34869e+06	6.00379e+07	5.98466e+06	2.82723e+06	9.87268e+07	1.31616e+07	3.81208e+06	6.29199e+06	189623	1.29161e+06	1.83179e+06	252505	1.43342e+07	5.80193e+06	2.55427e+06	8.44578e+06	1.24204e+07	1.2126e+06	9.02643e+06	1.29859e+06	400364	1.00422e+07	3.0626e+07	2.47197e+06	2.1741e+07	863331	2.43803e+06	923029	891354	2.69081e+07
neg-3.094_163.02716	888083	1.28527e+08	2.11501e+06	1.38607e+06	1.55663e+07	3.94917e+06	2.18825e+06	7.2459e+06	675942	2.24947e+07	1.37721e+07	1.45368e+07	5.09501e+06	507310	2.88016e+06	1.0281e+07	847972	2.20063e+06	1.90718e+06	970858	7.43957e+07	1.16082e+07	2.16485e+06	1.08714e+08	1.67827e+07	4.8282e+06	8.20245e+06	127812	2.56086e+06	5.14745e+06	103850	2.64471e+07	8.40587e+06	1.44662e+06	1.85132e+07	2.21296e+07	2.31539e+06	1.44153e+07	517511	1.49062e+06	1.21698e+07	4.53264e+07	5.19317e+06	2.85331e+07	382569	6.30666e+06	414337	563546	5.38224e+07
neg-3.094_223.04832	1.55137e+06	1.19376e+08	2.53937e+06	1.6258e+06	1.4547e+07	3.74394e+06	2.04741e+06	6.80775e+06	917922	2.07858e+07	1.28527e+07	1.36884e+07	4.86521e+06	304873	2.85349e+06	9.33438e+06	663420	2.46873e+06	2.42798e+06	956955	6.79438e+07	1.10676e+07	1.84811e+06	9.92853e+07	1.52638e+07	4.46699e+06	7.56036e+06	123116	2.39511e+06	4.88922e+06	79958.9	2.46018e+07	7.97676e+06	1.54093e+06	1.70524e+07	2.07581e+07	1.17884e+06	1.3436e+07	492339	178325	1.14225e+07	4.18937e+07	5.06679e+06	2.50561e+07	43388.9	5.87476e+06	267137	335239	5.00244e+07
neg-3.097_322.97397	57481.3	1.96265e+06	60449.3	40772	401143	57700.8	47369.5	105489	43639	529323	263053	328958	71203.2	33580.7	40032.1	212859	24704.7	39362.1	62029.2	56365.8	1.67168e+06	159151	49967.1	2.4716e+06	400185	100234	194268	32739.5	70947.7	103086	28964.1	479266	170527	52274.7	340874	566898	43418.5	265510	31389.7	42333.7	194516	637615	44821.9	598881	44317.7	81939.6	38971.5	28935.9	815815
neg-3.161_412.02183	119558	703358	221223	1.4025e+06	103214	270631	143447	340736	967932	964206	105146	2.55769e+06	92752.8	740291	89989.3	687311	372938	172807	156891	282094	386571	137971	219097	129553	5.0715e+06	2.55349e+06	255639	369362	84385.5	114539	142641	3.70194e+06	146691	169969	158199	704516	501430	102903	88273.1	168072	2.09704e+06	171373	642506	785261	1.67496e+06	81011	238211	186465	294076
neg-3.17_312.09633	3.26768e+06	2.49928e+07	1.20352e+07	4.74321e+07	3.76561e+06	9.7157e+06	7.66211e+06	1.46225e+07	2.25051e+07	2.13423e+07	4.88888e+06	8.14971e+07	4.90899e+06	1.46308e+07	8.73075e+06	2.24962e+07	9.57122e+06	1.78571e+06	7.21287e+06	1.05937e+07	1.96793e+07	4.59758e+06	7.26201e+06	3.60619e+06	1.91519e+08	4.20493e+07	9.73257e+06	8.82576e+06	2.53803e+06	6.21767e+06	3.06281e+06	8.27439e+07	6.49756e+06	4.35887e+06	7.44036e+06	2.01827e+07	2.55681e+07	1.71622e+06	2.51238e+06	6.09982e+06	5.37063e+07	5.29169e+06	1.52104e+07	2.74168e+07	3.58971e+07	1.78569e+06	1.25559e+07	1.20953e+07	1.62722e+07
neg-3.179_287.01053	78402.1	6.06286e+06	1.08756e+06	2.78213e+06	226967	1.64127e+07	110288	215009	6.39648e+06	1.48413e+06	858498	219871	120783	49608.7	512270	3.24119e+06	7.75651e+06	264676	344090	71904.1	496296	215069	753071	123589	192878	2.1448e+06	170391	2.75374e+06	8.32641e+06	148195	1.59937e+06	1.52385e+06	302866	921913	959653	774873	1.35e+07	1.19132e+06	1.90135e+06	743563	160165	1.59578e+06	4.39897e+06	4.1998e+06	307782	536325	81245.4	2.63893e+06	74168
neg-3.179_587.28624	42806.3	62160.7	419591	50314.9	36954.5	177209	1.18534e+06	185386	41722	134801	53164.4	114337	106863	2.05615e+06	442858	746349	131444	1.20793e+06	1.98062e+06	164459	68451.8	49398.9	48359.3	30660	40966.7	736423	593300	37624.7	43919.3	189183	2.99527e+06	45321.5	52521.2	2.53429e+06	99988.7	81021.6	41942	29346.6	127748	95661.4	38676.6	303824	213273	101428	42049.8	29005.1	560123	553141	566791
neg-3.24_253.13194	32998.3	168949	76353.7	141430	29222.3	261870	38830.2	134850	106861	344898	36219.9	152530	322126	36529.1	73204.5	241645	77182.8	49388	53152.6	425666	138982	40946.9	37465.9	28572.4	253263	61769.9	32400.8	164269	156456	205492	32773.8	88952.3	36354.5	38977	124298	117569	34536.8	274153	128314	38915.2	332574	43019.9	89515	100706	26136.6	98677.1	182996	74174	89563.2
neg-3.241_250.13213	1.09324e+06	227405	356970	267086	210483	100465	40526.2	181257	44520.5	103734	103616	58297.3	260743	42753.2	124152	31819.6	168857	124464	55474.2	105452	187460	42735.3	77003	26735.6	138026	107137	107974	387658	120970	39183.4	37419.8	45947.6	239410	131696	58636.5	69049.7	31532	32916	33206.3	157575	43119.4	25730.2	37020	61465.9	34706.3	41797.1	41672.4	239527	76865.2
neg-3.243_485.20171	130967	140917	520163	107883	199816	81835.1	203978	184598	490246	128263	313876	6.1277e+06	222401	321071	161321	102911	71651.9	222525	800112	295351	270389	124770	103200	116193	79749	637731	330616	282368	81097.1	157780	227573	470196	97986.1	108881	228816	433450	232051	1.00846e+06	326419	758178	84067.7	242905	918273	105636	3.0039e+06	96858.9	143504	271044	125216
neg-3.249_412.02186	42509.5	278929	118215	463100	46752.1	143852	41512.8	186674	367413	370219	140955	590065	43763.5	300877	57000.3	90441.7	215155	52799.9	57185.5	57339.5	115009	56533	243748	76092.3	831734	779113	162544	197087	25506.8	55458.7	39451.4	1.62178e+06	115234	90340.1	103682	174650	187088	33717.3	35402.3	42854.6	534308	182927	223966	249507	656420	32896.8	93631.4	109618	145699
neg-3.251_312.09633	905405	8.5789e+06	6.6417e+06	1.53846e+07	1.13707e+06	4.79918e+06	3.02727e+06	7.19886e+06	8.81492e+06	1.01253e+07	3.60003e+06	3.21426e+07	4.22808e+06	7.58404e+06	3.0855e+06	8.50916e+06	5.0949e+06	599082	1.40088e+06	3.54771e+06	4.89393e+06	2.01351e+06	4.23119e+06	936502	4.22533e+07	2.22735e+07	4.59184e+06	3.65428e+06	321422	5.33178e+06	1.48525e+06	3.52817e+07	2.44027e+06	1.22391e+06	2.1336e+06	5.76111e+06	8.84842e+06	602001	526397	919466	1.72357e+07	3.77445e+06	6.66196e+06	9.467e+06	1.43493e+07	272953	5.73577e+06	3.07636e+06	6.99086e+06
neg-3.254_310.10316	569874	5.75019e+06	4.58262e+06	1.18086e+07	1.03988e+06	2.24531e+06	2.15584e+06	3.80415e+06	6.20729e+06	6.8251e+06	1.88269e+06	2.48942e+07	1.28979e+06	5.73037e+06	2.10827e+06	5.14514e+06	3.69677e+06	246110	1.0367e+06	1.99343e+06	3.12898e+06	1.2659e+06	3.05059e+06	788793	3.15488e+07	1.46241e+07	3.19253e+06	3.12235e+06	298126	1.41209e+06	889632	2.53904e+07	1.52663e+06	1.12491e+06	1.44687e+06	4.07142e+06	6.82754e+06	450023	347316	530333	1.3385e+07	2.90814e+06	4.46543e+06	6.87953e+06	1.10845e+07	137583	3.02405e+06	2.65893e+06	5.0749e+06
neg-3.256_313.09968	198584	753519	690320	1.59078e+06	374405	562756	288270	316251	903917	878296	292224	3.46399e+06	97314.6	784398	233045	768512	468773	224061	523761	184156	480352	443923	280438	256902	4.68756e+06	2.24878e+06	643843	455456	167088	480949	247564	3.79439e+06	220212	97831.5	141478	460710	897888	159468	111126	108492	1.86036e+06	335198	627289	1.09536e+06	1.59656e+06	107949	433402	365943	472051
neg-3.256_588.24075	69899	102570	109836	1.38683e+06	235717	363841	4.4019e+06	1.37169e+06	95000.9	68455.4	147306	2.17288e+07	75462.7	7.91225e+06	278565	1.99687e+06	38241.5	2.07572e+06	2.70906e+06	2.3027e+06	53574.4	60494.2	55079.2	62471.3	119852	1.12088e+06	563509	45829.8	190312	51004.8	5.04379e+06	501637	125237	3.47964e+06	115922	123777	49146.4	49832	51078.1	330375	44868	241891	231858	364013	41666.8	78624.5	2.62535e+06	1.52259e+06	1.34557e+06
neg-3.278_678.29614	288159	247539	485716	468918	223969	335212	556937	634347	1.39325e+06	295379	900669	4.50644e+06	701465	492557	510091	249180	202267	284708	466982	196548	233946	319685	217558	257269	224096	414026	202940	898716	200482	1.96155e+07	164052	470170	248481	242439	227283	932797	278384	258909	545046	756840	865514	3.76654e+06	520681	378090	533980	223444	321172	3.98077e+06	322765
neg-3.295_712.32955	26062.5	32161	65679.2	45369.2	270961	49035.5	562902	71324	38387.1	38967	43825.9	442126	53175.4	5.34718e+06	315984	3.47362e+06	30718.1	802175	6.17966e+06	34018.2	37254.8	41616	32672	40534.9	36935.8	694394	479903	33805.5	281035	35591.6	1.6956e+06	127890	37705.8	5.03413e+06	47765.6	33445.5	45625.6	40390.4	250178	46408.7	179240	33844.8	67113.3	37862.3	60533.6	28738.5	2.91365e+06	537846	45032.2
neg-3.318_225.06394	3.51485e+06	1.11262e+08	9.27343e+06	158030401	6.48052e+06	6.62408e+07	768471	8.95771e+06	1.50846e+08	1.36052e+07	3.41463e+07	3.36011e+07	3.79709e+06	679545	5.66696e+06	1.02489e+08	9.66778e+07	1.09126e+06	3.8311e+06	4.77228e+06	2.63071e+07	1.65159e+07	8.53738e+06	3.23897e+06	6.22348e+06	3.04273e+07	5.43777e+06	1.35626e+07	6.84563e+07	2.30815e+07	1.81398e+06	9.01362e+07	2.68211e+06	8.89376e+06	2.64449e+06	1.3057e+07	7.17807e+07	3.77655e+07	3.61064e+06	6.42042e+06	3.07553e+07	1.46211e+07	5.16621e+07	3.97615e+07	3.6867e+06	1.28412e+07	1.22236e+07	4.76349e+06	1.64459e+06
neg-3.321_161.0478	5.31292e+06	1.24037e+08	8.39582e+06	1.77274e+08	4.92057e+06	7.46334e+07	551043	1.02075e+07	1.68976e+08	1.36409e+07	3.78099e+07	4.04339e+07	4.40197e+06	802849	9.60612e+06	113678669	1.08684e+08	6.0106e+06	2.94352e+06	4.31775e+06	4.71359e+08	1.91472e+07	6.36729e+06	2.78975e+07	1.57155e+07	3.29664e+07	1.48676e+06	1.38996e+07	7.80665e+07	2.34092e+07	2.71343e+06	9.66459e+07	1.69132e+07	8.48737e+06	7.31111e+06	1.45164e+07	7.98166e+07	4.32685e+07	1.28992e+07	5.49745e+06	3.17616e+07	1.59373e+07	5.82325e+07	4.35788e+07	6.90402e+06	1.43302e+07	1.16718e+07	5.98021e+06	6.57423e+06
neg-3.321_207.05324	4.78977e+06	1.11175e+08	7.32661e+06	2.08214e+08	4.78781e+06	7.43877e+07	7.53081e+06	3.59521e+07	1.65584e+08	2.87032e+07	3.42099e+07	7.05778e+07	4.21517e+06	3.88078e+06	8.9031e+06	1.12232e+08	1.07589e+08	2.06783e+07	5.87137e+06	4.72913e+06	4.7899e+08	1.60192e+07	8.42087e+06	5.62558e+07	2.55195e+07	3.59668e+07	8.3468e+06	1.21932e+07	1.0553e+08	2.10119e+07	2.58762e+06	1.10359e+08	3.28035e+07	1.50758e+07	1.80461e+07	1.24726e+07	8.2914e+07	5.33852e+07	1.90061e+07	4.89796e+06	5.22519e+07	1.72518e+07	7.13975e+07	4.16561e+07	6.46434e+06	1.17379e+07	1.08622e+07	1.54118e+07	2.94521e+07
neg-3.324_295.98516	32307.9	836355	837283	140264	1.28884e+06	31125	2.4674e+06	4.87489e+06	92127.9	727333	37478.5	44909.2	562743	34086.7	1.37164e+06	6.26145e+06	1.32529e+06	1.14977e+06	1.30111e+06	30778.1	6.53419e+06	813565	34401.7	25274.7	30871.2	329374	40608.3	31229	30609	2.99074e+06	1.478e+06	4.25155e+06	4.9663e+06	6.78873e+06	1.04963e+07	1.83827e+06	436921	30255	31956.8	245302	7.40417e+06	892594	32824.5	781924	8.13059e+06	97468.6	550523	32557.1	1.70824e+06
neg-3.328_254.04302	308757	73416.9	282189	383699	4.03486e+06	6.59584e+06	105780	450820	838619	1.14257e+06	1.24505e+06	2.23042e+06	2.64389e+06	241889	909679	7.45116e+06	881422	79178.6	3.115e+06	3.65546e+06	244556	261767	1.90052e+06	1.22886e+06	119914	59461.1	540535	376993	58312.2	1.21069e+08	1.0496e+06	402553	383501	1.7337e+06	120977	352682	208769	2.77676e+06	70275.4	318883	148030	87201.1	1.02987e+06	6.1687e+06	75028.7	269763	208259	185996	341042
neg-3.34_592.27208	31314.7	34558.3	478128	68274.5	31132.6	1.07529e+06	5.99274e+06	208536	38094.4	43600.6	41713.3	2.97746e+07	156183	1.16759e+07	194955	6.41754e+06	73679.7	4.42299e+06	3.58715e+07	1.49729e+06	39871.1	30666.2	1.15038e+06	28508.2	32567.5	932068	2.11137e+06	37041.3	380909	375761	3.68332e+06	78241.4	98412.5	2.93704e+06	687043	30187.9	203569	32670.7	64609.2	43937.1	114909	132704	277525	26074.3	41519.8	54879.8	607602	1.1612e+06	168539
neg-3.341_533.21642	49055.5	33360.5	111826	38669.3	75596.3	571010	3.07168e+06	429946	52180.6	371036	122673	92351.1	79640.6	7.93366e+06	275290	2.83416e+06	37433.1	1.66907e+06	967387	2.95959e+06	42067.4	29603.3	36041	91055.9	53358.4	1.95556e+06	644995	35757.4	85801.7	34725.1	3.63463e+06	393329	262646	3.57253e+06	62905.9	108603	32610	150572	95514.5	76237.1	44491.5	579148	363688	206256	62706.3	56838.9	1.69652e+06	1.07736e+06	1.8569e+06
neg-3.343_177.04266	113314	285301	152063	340705	127752	193269	960986	116248	130237	375097	163450	171334	142776	108491	137596	295799	335057	156764	109209	106471	203524	73814.5	219936	186082	130112	73203.3	138863	159097	199913	144312	103906	321147	156401	189600	80196	181970	243423	336370	118245	98447.9	51584.5	189631	441630	188719	76046.8	133263	96607.7	118954	144198
neg-3.343_505.2397	378908	148342	593159	375571	911848	570603	7.02793e+06	499032	137130	274038	324187	1.09501e+07	684624	1.89189e+07	527084	2.45588e+06	477954	3.5222e+06	1.30328e+07	2.80513e+06	82521.6	746896	118548	298217	71053.5	1.83262e+06	2.33056e+06	379873	391225	69789.2	7.09845e+06	171637	290942	3.08399e+06	999859	135609	127328	529124	1.48396e+06	299980	174989	186648	589044	62206.9	78848.3	126067	373014	1.72365e+06	593551
neg-3.349_360.15407	49883.5	136923	354434	456696	278279	360780	519215	246088	832038	149834	104949	366525	117569	466135	498461	59857.7	263869	85800.8	1.59205e+06	1.54547e+06	3.52981e+06	326600	261377	824153	349398	50271.1	91960.2	389572	365030	145723	67063.2	645798	763902	84132.9	329122	56933.6	2.18582e+06	154286	134949	152326	487746	176860	551593	1.02958e+06	125425	365805	150063	462245	84668.1
neg-3.349_501.24454	431486	46887.4	1.24971e+06	336197	1.429e+06	974445	6.59449e+06	534523	247791	155044	670116	8.95277e+06	835393	1.79103e+07	884857	2.39784e+06	544315	4.36998e+06	1.32333e+07	2.75321e+06	421009	315932	155206	50259.1	103392	1.95082e+06	2.58995e+06	528793	744718	349175	8.87263e+06	172951	360323	2.90395e+06	1.19157e+06	351951	504405	139947	3.47482e+06	611230	241018	393073	1.71274e+06	135572	299444	227105	881099	2.06147e+06	344265
neg-3.35_280.154	29279.4	29018.3	86371.2	146557	29903.6	119447	53189.7	231698	133345	479048	41594.1	133510	34180.9	36468.2	27396.2	103160	65915.7	451903	47063.4	99056.2	2.67137e+06	33374.5	74786.2	26655.3	114050	77175.3	39293.2	31202	30171.8	1.89984e+06	34599.6	32376.9	114965	49382.3	29622.8	45955.1	78923.3	34218.5	36361.7	44101.4	58770	147229	32192.3	92003.5	71957.2	46211.6	33392.4	31780.1	45496.2
neg-3.354_565.19654	34745.7	50409.9	185908	317935	35486.5	526467	2.11721e+06	1.11708e+06	36111	39506.2	49359.6	44636.6	40562.3	6.2146e+06	355740	2.67458e+06	36245.5	1.77877e+06	2.98745e+06	1.68747e+06	41785.8	42827.7	42519.6	31631.7	37416.8	1.29864e+06	1.24664e+06	40502.2	48848.4	39913.2	6.47143e+06	303047	56592.3	4.66751e+06	39340	88775.6	65099.6	56147	43514.7	52334.9	45382.8	458655	301903	42410.9	45234.4	32723.1	1.62095e+06	389710	209560
neg-3.357_746.29219	32414.9	69259.9	140206	244984	36825.1	1.00579e+06	3.68767e+07	734787	123522	36856.1	223765	46865.4	37841.4	2.5629e+07	2.05288e+06	1.75061e+06	44687.4	5.00192e+06	4.44295e+07	882234	38982.7	39954.7	81971.3	31260.9	508822	5.82783e+06	1.27331e+06	37785.2	292004	181921	2.84776e+07	43748.5	85258.5	2.06076e+07	36701	116319	127452	106355	78540.2	48824.2	33269.8	98543.8	272623	1.00381e+06	40878	31621.9	1.20409e+07	1.75559e+06	738613
neg-3.358_270.15857	104376	113550	135144	123650	52046	270949	83225.1	72620.8	127209	63191.3	68806.2	100183	58078.5	65189.1	51522.6	158789	63019.9	94973.4	131867	53850.3	219101	63430.5	86439.1	103775	112452	81763.5	106364	73341.6	121290	57761.8	91134.7	118891	74618.3	91959.2	74978.2	60700.7	150730	143718	61802.6	75314.5	59838.3	49838.7	74630.1	163143	69341.4	51824.9	78751.6	85723.6	101593
neg-3.368_451.15347	36135.5	327569	85215.5	48855.4	53929.8	1.97532e+06	1.01924e+07	1.77909e+06	108554	163454	2.87003e+06	117200	1.20318e+06	3.00501e+07	3.23024e+06	9.78478e+06	136003	1.31556e+07	1.05569e+07	4.63218e+06	265757	38926.1	282563	1.00622e+06	396940	1.20898e+07	6.01817e+06	386122	585239	145364	3.90331e+07	1.29355e+06	321127	2.24381e+07	1.73181e+06	1.28124e+06	87480.3	1.32388e+06	204259	119376	37311	5.10299e+06	2.7047e+06	395009	1.38435e+06	425551	3.46884e+06	1.33626e+06	1.84954e+06
neg-3.379_167.05834	1.45567e+06	1.5596e+06	1.60701e+06	2.07292e+06	994206	1.54556e+06	1.35229e+06	1.31552e+06	1.65557e+06	5.37108e+06	873205	2.93474e+06	636065	1.41233e+06	851390	1.17747e+06	1.10777e+06	842922	2.04874e+06	2.79053e+06	5.06043e+06	2.74539e+06	1.00251e+06	1.44857e+06	2.39075e+06	611501	1.249e+06	1.31767e+06	943301	2.81295e+07	1.03128e+06	2.56413e+06	1.72141e+06	6.19331e+06	658495	768059	1.63533e+06	1.33617e+06	721930	1.0239e+06	1.15468e+06	1.93279e+06	1.76945e+06	3.87689e+06	892615	1.53184e+06	5.39288e+06	1.18086e+06	2.62555e+06
neg-3.38_324.14267	3.32855e+07	539093	1.04499e+07	182190	3.07912e+07	242146	507801	469307	214069	421890	1.08942e+06	286667	897878	220659	1.83138e+06	315930	6.37555e+07	222801	3.69247e+06	209251	439399	349740	2.65606e+07	355370	251968	522526	2.04089e+07	1.9124e+07	516871	201536	6.0755e+07	437122	1.00993e+06	610226	3.42664e+06	2.83665e+06	494706	1.15604e+06	331619	3.30105e+06	211687	2.36604e+06	5.23112e+06	678051	253283	774531	990407	412883	3.77618e+06
neg-3.383_186.08927	614219	421679	455364	194509	415606	1.00532e+07	317304	371430	518823	705313	519439	659765	432030	330998	182394	7.72921e+06	329824	398916	627769	1.46134e+06	7.38202e+06	2.00257e+07	542605	379650	140624	385057	129544	373554	460747	1.22047e+07	376037	820382	308045	288501	304664	1.57937e+07	405843	227516	77438.6	402973	116650	358852	122628	5.90487e+06	468967	223034	115079	368264	363081
neg-3.384_434.18122	931369	84852.2	1.0238e+06	350918	410773	358533	1.09642e+06	507085	214664	235466	897114	318606	236796	1.45437e+07	2.28056e+06	143592	358451	534757	5.344e+06	298470	526413	837205	229826	338581	377092	1.10703e+06	3.07262e+06	501875	307089	326807	3.01686e+06	143729	348104	408910	1.64247e+06	755412	850918	428406	346060	660217	121884	303478	270992	447358	564333	406003	1.48435e+06	877714	864006
neg-3.386_566.18076	64271.7	64928.1	92105.7	1.63123e+06	39001.8	261512	2.47324e+06	283111	51850.4	52229.8	60631.3	66178.9	44934.5	1.69294e+06	41001.2	946773	46532.5	1.27487e+06	559184	1.27667e+06	96830.2	76362	57113.8	232647	97331.2	494285	73214.2	44119	51935.8	41648.6	843928	789598	81323.7	491607	50889.6	44096.9	52234.6	88461.9	43765.9	51841.9	46963	59283.4	69320.1	246796	83510.2	49484.7	553138	52902.5	359234
neg-3.407_238.09571	948071	1.26628e+06	893082	1.35923e+06	951675	3.7175e+06	2.5009e+06	1.34976e+06	542353	1.65948e+06	1.04023e+06	505094	7.14617e+06	308026	488408	3.98807e+06	1.40389e+06	2.16655e+06	718618	1.34792e+06	1.1296e+06	742902	1.05291e+06	946788	1.33883e+06	946309	2.77503e+06	393577	1.34868e+06	9.4924e+06	533030	623322	1.96335e+06	1.62237e+06	1.20434e+06	9.3662e+06	1.16347e+06	1.54637e+06	1.62283e+06	2.75482e+06	1.67542e+06	1.3888e+06	1.73582e+06	4.22807e+06	1.93387e+06	968925	961460	424213	857781
neg-3.41_252.14789	79171.6	52352.2	177793	67725.5	243537	56575.2	146896	63174.4	437375	839891	128865	51778.2	346445	69135.5	303680	79594.7	84538.7	789394	54074.5	146210	255810	100506	142281	77331.5	181249	42178.8	326033	993563	34755.6	3.59776e+06	69548	82432	60862.1	737618	52426.2	232517	55630.9	336232	1.12896e+06	128187	78771.7	56514.2	61286.3	188759	150130	51349.9	874401	156028	92183.3
neg-3.41_296.13757	4.24005e+06	1.49287e+06	2.41061e+06	3.99147e+06	265764	1.19998e+06	519823	1.77599e+06	2.35077e+07	4.3635e+07	1.20906e+06	1.4707e+06	2.44358e+06	2.60867e+06	1.02786e+06	1.87393e+06	3.55139e+06	6.2487e+06	1.27086e+06	1.24226e+06	2.85098e+06	2.66424e+06	6.03349e+06	1.44365e+06	4.73282e+06	3.42976e+06	3.66393e+06	3.33302e+06	1.35029e+06	2.00395e+08	1.55078e+06	880587	918255	809462	1.17766e+06	1.65136e+07	1.33542e+06	1.02967e+06	3.07416e+06	2.30909e+06	411734	2.0023e+06	924123	1.69925e+07	3.90735e+06	2.8406e+06	1.65246e+06	2.15223e+06	4.78663e+06
neg-3.41_297.14113	1.22794e+06	1.43373e+06	185339	947855	669536	264430	199782	590143	3.54298e+06	6.86639e+06	877453	1.35472e+06	394509	366407	546494	535510	754245	985815	320154	1.08263e+06	2.09175e+06	889539	801866	196531	1.28043e+06	466195	528662	387026	137946	2.90835e+07	135272	647518	684005	284547	352981	2.15251e+06	259749	260609	403239	83997.6	154880	692720	237522	1.79021e+06	695939	913529	591431	418955	979151
neg-3.411_236.03239	330188	233967	256801	105435	5.61507e+07	8.80785e+07	150071	171457	2.98215e+07	251887	1.49445e+07	110668	8.88489e+07	103868	234887	9.10343e+07	284695	108128	2.66121e+07	9.05502e+07	3.84575e+07	1.96014e+06	1.08436e+06	147465	270652	404708	3.86017e+07	196143	42332.8	7.42753e+07	139157	4.67586e+07	218681	481033	333723	1.22789e+06	670657	9.7413e+07	245151	150212	120211	290433	88188.5	2.15178e+07	134730	823851	240335	124109	135160
neg-3.412_190.02693	211931	119733	234852	96759.6	5.94314e+07	9.25939e+07	167426	219842	3.18635e+07	299289	1.56017e+07	124862	9.35856e+07	115090	170017	9.52484e+07	194008	121627	2.79725e+07	9.52779e+07	4.03107e+07	2.24604e+06	167734	150767	234855	130335	4.04645e+07	170817	92430.2	7.80129e+07	260379	4.89659e+07	161859	154693	94048.1	1.23025e+06	275902	1.03223e+08	125537	182453	93872	182382	221962	2.26052e+07	462608	107541	92736	180211	173725
neg-3.412_318.11947	36400.1	40862.1	80011	41261	38522.5	41133.9	76356.1	35533.8	41323.6	513023	45868.6	50164.4	41355.1	52487.6	41587.7	96537.1	29495.8	55469	65584.6	41467.4	57266.5	60497	241972	33974.5	55463.8	36872.6	45174.1	34691.3	42153.6	816542	54002.8	41099.9	73817.1	68672.2	40421.3	125117	41896.2	38585.7	37790.6	50076.3	41873.9	43166	35366.5	48899.8	134160	37794.4	39905.9	41252.4	60833.2
neg-3.412_396.06315	60343.3	32891.9	64404.8	33213	31008.6	33110.7	61462.8	34205.9	54866.8	176632	36921.9	40379.8	33288.8	42249.9	33476	60960.9	41400.6	49352.1	52792.3	33379.2	46096.7	35019.3	416311	27347.7	44645.6	29680.6	36362.9	27924.8	33931.6	790795	43469.6	33083.3	59419	55277.6	31239.1	35644.1	33724.4	31059.6	30419.5	40930.1	33706.4	34746.5	28468.3	64482.2	147031	30422.6	32122.2	33206.1	48967.7
neg-3.419_268.05869	968232	8.88398e+06	1.33348e+06	2.18693e+06	1.77907e+06	1.70804e+06	310708	1.04137e+06	7.41499e+06	2.85686e+06	220214	1.61622e+06	2.91399e+06	494673	1.68113e+06	6.93898e+06	2.36379e+06	1.23482e+06	543979	2.34709e+06	5.34798e+06	577043	641093	3.06798e+06	2.4509e+06	5.69195e+06	642010	1.91005e+06	2.54053e+06	1.85061e+06	711140	815541	1.45469e+06	1.7436e+06	1.66513e+06	1.93509e+06	1.64761e+06	616840	1.48939e+06	2.00068e+06	2.2088e+06	1.38911e+06	1.65557e+06	3.50381e+06	893158	2.923e+06	932483	1.76651e+06	4.2332e+06
neg-3.422_404.1803	532827	278710	395001	126156	2.18133e+06	307690	1.35525e+06	104612	743619	755816	1.64148e+06	622080	993305	71133.9	4.29916e+06	214279	398841	60415.8	350876	156591	133344	118774	506380	355906	222396	499526	642140	98569.3	831234	113239	455728	1.08464e+06	1.48284e+06	62034.1	105667	347231	547403	98147	278672	1.41808e+06	68118.1	106999	343677	484933	83609.7	1.01618e+06	127313	254843	76362.6
neg-3.425_287.01048	5.77749e+06	1.02403e+08	1.66702e+07	263291	110022119	3.97662e+06	5.26609e+07	3.2955e+06	1.44367e+06	5.59637e+07	4.37146e+07	1.70444e+06	6.71877e+06	2.78016e+06	6.83384e+06	1.11669e+07	1.72318e+07	3.71169e+07	8.51808e+06	1.72086e+06	1.58622e+06	504245	1.27665e+07	8.29666e+06	1.79213e+06	7.47537e+06	5.82132e+07	1.5097e+06	1.99513e+06	721705	1.07901e+06	7.33198e+06	6.76992e+07	4.15076e+07	6.20689e+07	1.14513e+08	7.85354e+06	2.61154e+07	7.82621e+06	2.45136e+06	1.66614e+06	1.39086e+08	9.28707e+06	4.20308e+07	660775	3.85669e+06	333935	2.82997e+06	6.39127e+06
neg-3.441_388.13978	585861	330505	1.04871e+06	457438	1.01114e+06	98048.9	654527	821708	194013	680834	479442	282129	325156	1.10613e+06	210557	323352	602045	1.73672e+06	6.58723e+06	618788	283777	538960	765145	190463	102632	382488	636755	717647	1.95125e+06	357095	317601	161060	2.08343e+07	633981	335717	548449	1.36924e+06	303113	425492	829960	877030	312328	101612	456564	177740	1.96709e+06	635185	764163	2.23812e+06
neg-3.446_314.14857	5.27787e+06	1.93447e+06	1.20481e+06	4.07712e+06	213732	1.13238e+06	1.61628e+06	1.65436e+06	2.36865e+07	4.40355e+07	4.45594e+06	2.5475e+06	1.73554e+06	3.02404e+06	1.48217e+06	609449	4.12902e+06	5.20448e+06	2.80373e+06	3.22074e+06	3.65774e+06	3.04021e+06	6.69745e+06	590768	5.0968e+06	3.60492e+06	3.97594e+06	1.46108e+06	591760	1.9604e+08	2.50675e+06	1.43165e+06	598600	1.13198e+06	4.83788e+06	1.88459e+07	1.60333e+06	599425	2.32429e+06	1.64994e+06	705117	2.24077e+06	720708	1.76397e+07	3.05848e+06	1.48155e+06	2.92736e+06	1.7025e+06	5.76791e+06
neg-3.446_400.18553	3.63134e+06	183358	1.51274e+06	367826	1.3812e+06	336729	4.87348e+06	1.2987e+06	3.96845e+06	736313	1.85381e+06	807580	3.78437e+06	339938	3.58403e+06	3.01301e+06	2.28652e+06	78860	1.52532e+06	1.42961e+06	3.72607e+06	290432	2.43587e+06	455202	120949	2.31727e+06	6.57425e+06	1.09605e+06	5.00917e+06	430630	1.95434e+06	2.05026e+06	5.22347e+06	218411	2.00916e+06	834718	590754	173876	1.15758e+06	3.24776e+06	150645	200062	1.77661e+06	1.53706e+06	512408	2.61889e+06	216913	137306	996706
neg-3.45_816.38764	4.38668e+06	40713.1	68849	172461	39351.4	35866.1	54189.6	226817	75088.5	42574.1	183088	76745.1	47696.7	110255	582419	52162.3	347138	58431.3	55163.3	30046.3	40828.8	67962.5	43051.4	32442.8	160927	33968.4	44785	44398.5	247988	34366.1	39005.4	71552.7	64923.2	70411.3	139554	228548	36031.6	31189.3	279098	89480.5	372893	309267	128488	171276	52081.1	278251	121106	905737	53704.1
neg-3.458_255.06207	535165	2.2503e+06	483380	4.28361e+06	688129	8.84612e+06	399932	892434	2.653e+06	500371	4.48546e+06	1.14252e+06	1.74359e+06	283726	1.0476e+06	5.78721e+06	591059	1.59799e+06	499331	951540	3.73499e+06	908909	2.14921e+06	1.46225e+06	1.10526e+06	1.00848e+06	455259	690615	979172	2.83326e+06	337015	8.75823e+06	2.07205e+06	2.33612e+07	728983	951302	3.67504e+06	1.20142e+06	748492	932579	4.24843e+06	983614	1.77907e+06	1.77344e+06	798320	2.27458e+06	1.35313e+06	738725	878245
neg-3.46_282.03808	161714	211800	238481	100902	431061	449020	932121	630900	3.07787e+06	201660	142712	1.1198e+06	346212	74502.9	1.07464e+06	1.15208e+06	455231	103386	117469	386367	995137	443440	238288	409110	429953	616181	144299	243221	117465	417787	204623	1.15119e+06	285404	343604	133248	364332	204611	157083	339536	296692	209895	155452	1.20265e+06	1.05833e+06	595733	337803	1.38807e+06	302469	116691
neg-3.463_404.18027	4.74088e+06	1.33964e+06	1.16409e+06	583831	2.18133e+06	1.13972e+06	4.5853e+06	997933	5.78923e+06	928261	2.75173e+06	1.05072e+06	4.12042e+06	211627	4.17729e+06	2.78163e+06	2.48344e+06	105915	2.86781e+06	729449	524540	121337	1.99952e+06	1.34002e+06	1.29492e+06	2.45053e+06	8.25534e+06	925744	6.08666e+06	1.13255e+06	2.02367e+06	1.52678e+06	5.18508e+06	459421	2.27603e+06	175753	1.90563e+06	484725	678883	2.31713e+06	290307	301404	2.38342e+06	2.05326e+06	584694	3.14772e+06	1.40118e+06	701871	616181
neg-3.463_510.12397	344526	561509	125896	3.96539e+06	378299	2.71513e+06	158044	90450.8	758601	321503	4.64093e+06	575276	103050	135947	1.31337e+06	2.20069e+06	271958	171374	104199	233627	1.0648e+06	128375	157875	116717	200786	989772	84613.2	99429.9	1.15747e+06	688048	77196.3	4.27056e+06	219428	2.48347e+06	90489.2	622388	3.02741e+06	735232	116982	91973.7	3.44166e+06	375572	1.36559e+06	1.34935e+06	133172	1.55809e+06	1.48246e+06	499052	287846
neg-3.5_317.15915	1.13217e+06	386357	3.78592e+06	814693	655416	7.94171e+06	1.24438e+07	7.86499e+06	699374	787349	1.6185e+06	685283	1.13079e+06	5.72402e+07	1.12901e+06	5.36475e+06	1.6174e+06	9.67311e+06	1.43863e+08	2.81734e+06	568278	882748	1.1922e+06	435068	411793	6.06655e+06	9.38536e+06	1.37756e+06	2.96632e+06	1.12183e+06	2.14305e+07	7.01681e+06	5.84428e+06	2.84461e+07	9.99291e+06	3.9714e+06	599484	993428	956293	503909	372138	806531	697502	3.89372e+06	1.20524e+06	796648	1.21217e+06	1.25077e+07	1.54772e+07
neg-3.505_213.04622	3.81262e+06	5.4537e+06	5.28648e+06	316971	1.00561e+06	4.62733e+06	1.44676e+06	4.16543e+06	285152	700579	212210	419987	4.09941e+06	351918	460851	3.0009e+06	750819	309585	358520	3.91096e+06	9.07411e+06	1.1667e+06	732018	1.13249e+06	1.14786e+06	771969	161413	2.92338e+06	1.0532e+07	291978	420496	2.44114e+06	149650	578342	2.22737e+06	3.07505e+06	4.81451e+06	444277	1.47115e+06	414336	224754	717647	191114	514170	3.98495e+06	708853	545936	90069.9	1.10401e+07
neg-3.522_283.06972	122487	2.10136e+06	274021	577426	544380	694536	282346	339529	440153	1.13622e+06	8.91425e+06	314339	347880	198704	416481	714562	99067.9	171283	353143	2.08607e+06	1.11749e+06	141678	504054	371631	374316	765106	311601	1.13801e+06	672394	6.67687e+06	173502	694232	372354	407112	274019	550051	437815	547263	238098	435311	445377	644880	489734	475678	1.29219e+06	500905	381029	352448	642065
neg-3.531_400.10078	1.19894e+07	147420	495137	69891.8	986568	221618	753712	50352.2	98214.5	100504	398922	118510	775607	371088	136035	952218	299377	327227	264810	80522.6	151686	440817	1.1088e+06	47579.1	379328	210024	1.43124e+06	1.40208e+06	148572	446521	1.70166e+06	303549	1.13273e+06	49710.3	607209	134443	44248.1	1.08551e+06	712516	1.25832e+06	66025.6	288689	3.41939e+06	172012	55864	814225	833379	578025	467184
neg-3.555_659.29659	38783.6	41073	71462.8	136045	45052.6	502025	8.88233e+06	517588	43908.5	44038.8	72548.7	46829.6	62808.4	5.75782e+06	994408	2.5238e+06	54031.1	835364	1.7682e+06	472966	37765.3	40558.9	70387.5	36230.2	38678.2	1.00289e+06	221850	50677.6	38471.3	131231	1.75034e+06	257733	3.26903e+06	4.8071e+06	40159.7	35231.8	43636.1	40015.1	84501.4	51393.7	422876	137003	145952	105361	42515.6	43805	736369	453823	201517
neg-3.56_350.10105	2.1644e+06	644641	240444	291347	178905	106167	2.35496e+06	949197	716744	111557	443780	345357	413393	81701.8	578720	1.77245e+06	248206	180510	93119.5	234303	2.2864e+06	230127	132056	118907	3.0897e+06	59775.4	468619	220928	70304.3	800801	86579.9	151168	359029	1.31422e+06	130536	2.32059e+06	451608	59965.9	256864	303735	540909	134509	91175.3	142905	1.28499e+06	200396	90124.2	67662.3	270222
neg-3.56_580.14397	741228	1.6324e+06	260933	639395	3.58983e+06	383933	270287	569049	181705	145784	3.03086e+06	1.58879e+06	1.52632e+06	1.14245e+06	402922	2.36682e+06	973599	1.55943e+07	172839	238304	666868	104687	5.87521e+06	1.81221e+06	196303	1.13346e+06	1.19077e+06	240253	1.43573e+07	252162	1.27427e+07	4.03283e+06	245815	219683	1.54761e+06	503508	118472	185677	3.93662e+06	1.66955e+06	373050	469267	2.65203e+06	125050	126511	2.6724e+06	141870	229226	143672
neg-3.572_423.21295	1.38443e+06	117216	894107	839763	5.73911e+06	2.06153e+06	415352	134183	1.28662e+06	472177	9.71206e+06	604792	2.78461e+06	1.41268e+06	4.59833e+06	857273	255409	414810	186561	136085	231907	179533	392499	174930	761032	1.52012e+06	157495	1.4716e+06	133952	2.71117e+06	578328	222334	356069	179406	5.84051e+06	2.48107e+06	283025	100762	1.43333e+06	2.49783e+06	86860.6	708060	3.19455e+06	1.00626e+06	144116	522039	209170	856560	361021
neg-3.578_292.02579	76586.6	61612.4	1.64984e+06	136406	125702	102750	1.51019e+06	54115.2	94094.8	91626.8	3.17761e+06	364091	193385	590877	258735	74647.2	3.24466e+06	218198	152537	79196.9	56518.7	70802.1	1.10425e+06	43095.4	115383	84969.8	3.76942e+06	3.38186e+06	69422.7	81214.5	369984	104630	112126	71769.7	38332.8	63333.7	63939.8	56444.7	1.35513e+07	116398	32097.4	127859	154743	57040.5	48016	72953.7	56585.8	55130.6	60019.7
neg-3.579_409.14948	446936	370484	1.3484e+06	826491	1.15725e+06	681318	758075	307438	760357	385106	698460	564753	628265	302093	532074	1.93171e+06	440894	515934	1.63947e+06	719875	581199	468634	677519	137578	409272	499218	305775	347660	437561	1.30876e+06	325651	736245	1.34026e+06	193579	181520	879208	702447	629753	462015	1.00319e+06	682141	522450	648292	1.77744e+06	226839	452033	240974	1.35616e+06	2.18151e+06
neg-3.593_253.09545	944987	7.20236e+06	1.22557e+06	5.689e+06	6.0019e+06	9.27813e+06	1.41407e+06	2.90543e+06	4.84872e+06	8.57002e+06	9.90829e+06	1.07536e+06	1.72144e+07	1.55701e+06	1.08922e+07	5.33992e+06	1.90106e+06	1.0773e+06	630021	3.05073e+06	1.59471e+07	5.52728e+06	1.19114e+06	864303	1.88713e+06	3.92752e+06	3.81705e+06	1.33441e+06	3.71064e+06	1.76735e+07	800838	3.16385e+06	1.24996e+06	1.2899e+07	7.63866e+06	1.55703e+06	3.05775e+06	3.44125e+06	4.63618e+06	2.73242e+06	1.94428e+06	5.20623e+06	2.87073e+06	5.25317e+06	1.99705e+06	1.21307e+07	1.91576e+06	1.51434e+06	2.96753e+06
neg-3.594_234.01684	61953.9	38512.4	58371.7	42164.1	5.30916e+06	473736	115481	50688	378357	50758.7	586716	55422	1.73764e+06	61114	55798.8	750222	89010.2	155264	5.36337e+06	720121	222246	160630	70585.2	53039.9	42752.5	47439.6	2.63019e+06	62307.6	55716.8	385076	63365.6	198787	91260.2	228092	47302.1	60348.1	59890.4	728254	89410	81126.2	40322	62183	53548	593484	71839.8	64426.1	47346.9	51639.1	55545.1
neg-3.597_397.01085	61442.5	1.10533e+06	7.38319e+06	3.9775e+06	8.00771e+06	470444	3.05223e+06	1.50438e+06	9.972e+06	191215	68835.2	1.63718e+06	180254	193725	3.17186e+07	2.73935e+06	1.70632e+06	110700	67537.6	774299	252331	1.31313e+07	648667	2.23752e+06	3.46356e+06	3.28632e+06	3.37524e+06	884809	6.22169e+06	338661	312123	102495	1.69525e+06	73233.7	350697	927948	9.67344e+06	44420.3	105345	87749.7	1.1044e+06	1.77683e+08	2.42321e+07	3.71682e+06	2.71821e+06	1.58033e+07	445397	1.35526e+06	1.23616e+06
neg-3.597_545.25288	128806	2.82688e+06	2.2531e+06	253585	345905	1.18946e+07	3.81055e+07	2.12743e+07	609113	346795	1.56162e+06	102178	2.05936e+06	135376701	7.66059e+06	5.17102e+07	272984	42394730	3.10934e+07	6.06138e+07	198696	35891.1	377602	2.95332e+06	115180	4.41228e+07	3.00228e+07	413230	2.4969e+06	113821	1.54443e+08	7.20213e+06	484273	8.6609e+07	2.90702e+06	1.7161e+06	126179	2.23871e+06	710007	141458	103709	1.92586e+07	1.62487e+07	5.58616e+06	68577.3	2.97265e+06	3.1174e+07	1.80246e+07	4.33759e+07
neg-3.598_297.08524	698448	1.83749e+06	303561	4.54755e+06	307205	345574	255178	619628	4.85837e+06	5.23913e+06	1.01361e+06	1.09476e+06	1.1848e+06	192132	356657	632454	553611	1.70554e+06	547129	595776	6.36172e+06	1.45036e+06	678034	399019	650639	3.78844e+06	2.34304e+06	464756	611397	6.18162e+06	204071	401708	430511	512400	205320	489824	490512	179280	984862	629928	1.04384e+06	2.15461e+06	882615	1.59086e+06	563740	1.07489e+06	984580	371460	715103
neg-3.6_290.01009	64818.8	40293.3	61070.9	240878	47827	85094.1	318318	124358	102960	53105.9	1.68445e+07	123875	214292	1.61224e+06	58379	229748	259723	116783	71248.8	238687	71266.8	79584.8	3.01661e+06	62334.7	237179	63354.7	138328	2.61066e+06	211099	52517.4	72684.1	344289	239284	77257.9	404244	66325.8	114329	182999	215479	84877.7	140773	690802	76883.4	46594	75161.8	156189	49536.4	570010	125917
neg-3.6_293.09031	364634	1.3166e+06	404317	4.27173e+06	263822	263008	270887	537790	3.99295e+06	3.59819e+06	519248	1.26647e+06	904147	191509	174976	120822	357524	1.26918e+06	462556	458335	5.09368e+06	1.27848e+06	341672	507486	3.60687e+06	2.42097e+06	1.31414e+06	438091	435614	4.85295e+06	240395	567576	452250	242678	109891	258529	692943	176205	801851	373970	2.04865e+06	1.98983e+06	455341	1.1564e+06	601542	887962	443622	428158	449644
neg-3.6_774.3238	61353.2	38139	57805.7	243026	45269.9	135874	4.74682e+06	183327	55560.5	50266.6	68735.2	62777.6	75146.1	1.119e+07	196576	1.26427e+06	61308.2	2.04309e+06	1.24585e+07	100162	67456.4	43668.7	69900.8	57934.4	56776.6	287920	619644	52783.1	55176.6	49709.5	4.05521e+06	102346	90375.3	3.18477e+06	48002.2	62779.6	59309.7	44355.8	79155.6	80339.6	39931.1	109542	53028.8	195907	71143.2	63801.4	172276	452478	563261
neg-3.601_193.07441	1.14772e+06	7.63347e+06	1.05162e+06	5.81565e+06	6.34103e+06	9.73031e+06	643279	1.61931e+06	5.3487e+06	9.28044e+06	1.03456e+07	1.10098e+06	1.76517e+07	517263	1.13306e+07	1.64313e+06	1.49894e+06	1.52783e+06	1.47675e+06	736120	1.65675e+07	5.60812e+06	948347	1.77363e+06	1.37011e+06	4.44372e+06	5.20086e+06	1.79603e+06	4.11694e+06	18065757	634909	3.24796e+06	996668	693117	1.04107e+06	1.06841e+06	1.6342e+06	2.78496e+06	4.99904e+06	3.88081e+06	2.34858e+06	5.58196e+06	2.82407e+06	4.85973e+06	434228	7.14549e+06	1.20946e+06	694070	1.85913e+06
neg-3.601_237.0642	1.86991e+06	3.45659e+06	1.32057e+06	7.55899e+06	1.71529e+06	4.81897e+06	1.81627e+06	3.52733e+06	8.59889e+06	8.47005e+06	3.7882e+06	2.4519e+06	1.00406e+07	1.30553e+06	1.50897e+06	3.8597e+06	1.49375e+06	3.71298e+06	2.33081e+06	5.20993e+06	1.05934e+07	3.6307e+06	905452	1.94571e+06	2.82018e+06	9.50408e+06	4.45018e+06	2.32476e+06	1.44253e+06	1.18828e+07	837270	2.3016e+06	1.72455e+06	1.66703e+06	1.72721e+06	2.43654e+06	3.19468e+06	2.00453e+06	2.786e+06	3.07176e+06	4.25172e+06	4.20529e+06	4.64594e+06	4.56639e+06	4.5398e+06	1.74247e+06	2.46642e+06	1.8874e+06	4.22184e+06
neg-3.601_296.09316	177929	140491	125282	672891	43319	77073.5	84990.7	68816.8	928418	1.57681e+06	90513.1	475878	71907.8	54582.3	270726	358697	58666.2	177280	64533.2	58676.6	1.61698e+06	179156	126671	202415	45621.2	466911	339364	112268	509419	413507	83271.2	263497	54361.2	351249	45933.6	60074.2	125704	215669	157486	76877.5	1.03559e+06	489627	565543	160507	289544	78971.8	77231.1	66080.6	124248
neg-3.604_207.08985	1.37328e+06	8.00043e+06	1.37523e+06	6.95651e+06	1.59834e+06	1.05368e+07	936734	2.71303e+06	6.28848e+06	1.008e+07	1.12022e+07	1.55069e+06	2.40723e+06	959418	799320	1.83318e+06	1.25207e+06	2.00382e+06	1.33089e+06	850973	1.71025e+07	6.28905e+06	2.38685e+06	1.86222e+06	3.09604e+06	5.02031e+06	7.43168e+06	2.08845e+06	5.16966e+06	2.81715e+07	887825	3.28951e+06	1.5405e+06	759956	1.08738e+06	1.5154e+06	1.4569e+06	3.17957e+06	1.89087e+06	4.95323e+06	3.1444e+06	5.77345e+06	1.83763e+06	5.61579e+06	1.13322e+06	2.70845e+06	1.53299e+06	696576	2.44997e+06
neg-3.612_181.07402	434925	3.10158e+06	1.69343e+06	3.60681e+06	1.26928e+06	1.28239e+06	771577	1.61536e+06	5.27896e+06	7.52096e+06	798687	5.08324e+06	3.32319e+06	393876	1.10557e+06	1.16238e+06	648381	8.52462e+06	1.42742e+06	3.24164e+06	6.08179e+06	2.7771e+06	1.36608e+06	691583	4.59666e+06	3.3904e+06	3.10134e+06	542641	924584	1.07318e+07	765257	2.18341e+06	722115	1.56873e+06	960193	934912	1.29709e+06	604679	334289	1.34006e+06	6.29526e+06	1.51809e+06	1.70336e+06	3.49977e+06	1.82746e+06	3.25513e+06	1.48314e+06	943449	1.19896e+06
neg-3.614_324.98976	55215.3	550149	817372	113816	137022	224564	59341.3	294831	692596	1.48176e+06	904214	132957	489363	140440	112329	361986	47813.7	1.82137e+06	337731	123118	694404	230736	364273	198319	270465	487114	1.2238e+06	178018	60008.4	1.35721e+06	237275	193160	378082	644938	108038	118098	183375	68207.5	62125.6	276644	801241	294497	711523	349838	157185	396416	168750	285413	157551
neg-3.618_646.26499	58395.8	188934	56869.2	7.14342e+06	63738	3.32145e+06	1.95662e+07	7.87008e+06	222144	48791.1	222338	444767	49764.4	5.36596e+07	1.08015e+06	9.03441e+06	50567.9	1.24497e+07	6.34138e+07	6.45275e+06	1.07742e+06	48740.4	63810.6	168595	194314	3.54821e+06	3.55302e+06	47330	286073	49595.9	2.44165e+07	1.5916e+06	155701	1.5754e+07	49074.6	147041	56900.3	47681.2	155429	52464.8	81163.8	1.4439e+06	651454	1.25692e+06	71401.1	823532	9.86887e+06	2.48131e+06	7.1485e+06
neg-3.62_531.23723	151818	59938.5	340086	3.12718e+06	38204.4	8.3438e+06	2.11984e+07	5.09185e+06	535746	48150.2	1.61363e+06	167522	895072	1.20938e+08	7.80069e+06	4.26949e+07	40024.3	3.72203e+07	7.50551e+07	2.98952e+06	68057.6	48100.2	292624	1.87828e+06	141431	3.25356e+07	1.27274e+07	186266	744977	87439.1	1.68859e+08	3.25958e+06	501614	8.42727e+07	478224	342770	120071	3.23764e+06	442639	113019	65083.7	3.20995e+06	5.79666e+06	3.90565e+06	70463.2	4.02756e+06	3.72386e+07	2.18127e+07	791158
neg-3.621_300.13023	32403.9	140221	41829.5	4.9735e+06	28256	3.32145e+06	1.95662e+07	7.87008e+06	216355	36211.3	87528.6	178846	36933.6	5.36596e+07	830362	9.03441e+06	30100.2	1.24497e+07	6.34138e+07	6.45275e+06	753856	36173.7	45689.7	168114	37133.7	2.74448e+06	3.55302e+06	29658.1	237376	33720.7	2.44165e+07	1.24341e+06	71949.7	1.5754e+07	36421.7	120842	37759.4	35387.6	38131.2	33255.2	32927.4	1.22817e+06	561431	1.25692e+06	52991.8	48495.6	9.86887e+06	2.48131e+06	7.1485e+06
neg-3.625_150.01651	56564.5	45893.3	61682.6	69275.1	41666.9	72578.7	45849.1	61906	53419.2	53397.9	90821.7	58485.5	54463	71218.7	90522.5	70689.4	44386.3	90279	75590.9	63937	62537.1	62742	67374.8	64820.9	54758	45450.2	59234.6	43734.3	113947	49725.1	67002	88210.7	67013.8	63701.9	53708.1	61799.6	82619.1	52183.2	56229	49038.7	48555.4	193511	60165.6	46874.4	78142.6	71512.5	63159.3	48261.4	67756.6
neg-3.629_659.38692	41545.8	145088	76268.4	955668	30603.7	794679	33675.5	32975.3	1.00053e+06	32733.1	189343	108103	40002.3	41851.8	66487.5	292281	792945	66308.7	38021.1	45182.3	1.63641e+06	46083.1	45112.2	42747.4	36984.2	1.28423e+06	79095.1	31000	1.54147e+06	126834	39738.4	422407	38737.2	41584.4	38214.5	38153.6	486293	33464.9	32718.7	36018.3	355183	234925	333689	1.76056e+06	49967.9	253316	38326.5	406550	130255
neg-3.631_621.07991	30211.4	23699.1	85949	33973.6	22254.5	26548.2	48870.4	23979.1	35139.3	32969.5	33944.6	27697.8	26193.8	30433.9	67335.9	37755.6	19251.5	32183.3	27648.3	32855.8	32456.2	137989	32804.8	24990.2	26894.2	21745.2	29965.4	22542.6	30676.7	22259.7	28897.1	35250.3	28169	30239.4	25893	27744.7	28681.7	24335.1	22107.5	26191.9	24179.6	476119	1.07645e+06	43619.2	29433.3	51356.8	24082.3	25337.1	31527.2
neg-3.633_587.07425	34992	27449.2	38158.2	878808	77667.1	30749.2	27154.6	27773.5	183400	75454.1	39315.9	130577	30338.7	29363.4	92245.9	73169.5	22297.9	37275.9	32023.3	38054.8	120343	216142	37995.8	161642	54902	25186.1	31172.8	26109.7	239745	25782	33469.7	40828.3	32626.4	28305.3	29990.3	32134.9	33220.3	25288.2	25605.8	30336.4	55313.3	1.79451e+06	311808	24078.7	34090.8	41690.7	27893	25355.3	36516
neg-3.637_396.01533	224791	8.76105e+06	7.33994e+07	3.28628e+07	6.05763e+07	3.47172e+06	2.27954e+07	1.1779e+07	8.71986e+07	1.26291e+07	936912	1.20046e+07	2.26725e+06	1.55964e+06	2.3498e+08	2.22595e+07	1.28647e+07	293622	204602	5.46502e+06	6.2738e+06	1.09202e+08	9.64946e+06	1.78991e+07	2.44603e+07	2.47591e+07	2.93983e+07	8.17061e+06	5.13796e+07	2.87869e+06	2.95467e+06	8.82473e+06	1.21263e+07	882308	3.17749e+06	5.91502e+06	7.95602e+07	172044	696842	757466	8.74091e+06	1387363491	2.07068e+08	3.08774e+07	2.28012e+07	1.29551e+08	3.07116e+06	9.31574e+06	8.70163e+06
neg-3.638_321.16966	64436.6	30691	56208.2	58358.2	250490	45294.6	39999.5	172704	48678.2	198938	57913.7	76413.3	110105	43253.2	82488.6	674141	32845.5	138553	49202.7	628667	159940	181764	55969.1	98425.4	83648.8	37100	45918.6	38460.5	50453.4	918707	41737.3	60141.4	55373	303776	210203	66116.9	516834	53660.5	37718.2	163248	117031	176337	613340	40802.9	527717	61411.7	574273	37349.2	332095
neg-3.638_360.03862	44722.9	26629.3	211573	70821	153683	39300.2	34705.9	57895.5	270517	34114.8	50249.3	52422.9	38775.5	37529	782508	52275.5	28498.7	47641.9	42691.1	47481.4	77322.2	248394	48562	57672.1	77754.7	53891.7	33133	33370.6	121856	32951.7	36213.7	40660.1	48044.9	36176.6	38330.2	41071.3	186415	32320.6	32726.5	38772.6	34429.9	4.24311e+06	656679	61894.4	115693	431461	35649.7	42563.6	50402.2
neg-3.638_486.01074	52551.1	182963	844644	487045	742725	46179.3	305400	193937	1.03049e+06	241997	59044.9	223024	45562.7	44098	1.54315e+06	245817	186687	55981.1	50163.7	137844	90856.7	1.27326e+06	57062.3	343971	466279	457930	400553	102777	947056	102434	56955	279035	163033	42509	45039.5	75038.8	1.38565e+06	37977.9	38454.9	45559.4	234273	6.21449e+06	2.76201e+06	384112	398598	955601	41889.9	131576	180897
neg-3.638_513.95126	96418.2	765604	7.68005e+06	3.68657e+06	4.63632e+06	333017	2.5623e+06	1.48887e+06	6.36571e+06	1.59322e+06	108333	927773	89259.9	191016	1.26385e+07	2.33219e+06	1.98104e+06	102711	92037.9	579539	481534	8.27889e+06	937605	3.20666e+06	2.5406e+06	3.01074e+06	3.70113e+06	1.29037e+06	4.89964e+06	155332	441302	926215	1.25174e+06	77993.3	368040	532975	4.24295e+06	69680	181681	83590.1	964886	7.49946e+07	1.48417e+07	3.21371e+06	3.07577e+06	1.18799e+07	285082	1.42121e+06	828072
neg-3.639_567.10487	35808.3	21321.3	36476.6	296930	30101.4	31466.5	27788	25732.1	33817.2	27314.7	33817.5	41973.5	26322.9	30048.4	57305.6	35893.6	22818.1	30327.2	34181.5	38017	38469	740393	35764.3	29619.9	192342	21050.2	26528.7	26718.9	35050.5	26383.5	28995.2	140780	38468.1	28965.6	30689.9	25646.1	33995.2	25878.2	26203.2	25641.6	148293	122503	263893	24640.5	34886.1	41738.7	28543.7	106656	32206.9
neg-3.639_638.143	33396.6	19885.3	1.37712e+06	568818	52679.4	29347.3	115811	77067.8	55987.9	41013.2	31539.8	30618	24550.1	28024.6	141938	298495	149175	28284.6	28512.3	35456.5	75216.2	302527	120069	154221	153789	34938.5	37736.2	24919.3	631662	24606.6	78887.7	48187.3	1.37128e+06	27014.7	28622.9	30328	330169	24135.2	24438.4	23245.6	25710.4	3.14284e+06	317626	383329	201090	271779	26621.3	721018	651578
neg-3.641_616.29069	137572	27183.8	77218.6	1.12196e+07	170557	4.08312e+06	1.15323e+07	7.63548e+06	118505	227583	218129	699453	78697.1	2.73116e+07	415803	1.03883e+07	51036.1	4.88338e+06	1.13379e+07	1.24467e+07	2.49937e+06	231602	45598	207354	161806	3.29164e+06	3.00732e+06	34065.4	120988	58791	1.85202e+07	1.91971e+06	49045.3	9.64042e+06	127048	84559.2	43342.5	255320	57221.7	32692	35146.8	1.76406e+06	878462	1.15418e+06	225175	53215.1	8.12133e+06	2.36791e+06	5.88147e+06
neg-3.642_372.08562	75526.6	361167	90030.2	535851	74143.8	491440	355646	133885	156697	561708	326314	283743	402866	76083	120869	609961	108989	80456.2	77904.3	3.9259e+06	135206	1113589	192644	62474.1	70231.5	203117	67283.3	56355.2	76690	486182	72241	519240	498975	133805	120793	91384.7	345135	320534	160880	65478.1	181983	258382	650960	390765	529754	100649	762311	367656	266474
neg-3.642_640.14082	39639.8	23602.7	681195	325486	34101	34833.5	112841	35663.2	46176	30237.4	39930.9	46464.7	32774.3	33263.6	74325.1	260835	25259.6	33572.2	37839	42084.8	68534	260602	59933.1	90758.7	74349.8	23302.5	29367.2	29577.8	393167	29206.5	54112.7	36038.8	960066	32064.9	28944.5	28390.2	191732	28647.1	32135.3	28385.3	30516.7	2.06433e+06	206904	176424	123806	99228.7	31512.3	357165	392909
neg-3.645_505.04419	1.98886e+06	867015	1.23998e+06	1.29338e+06	230486	950102	619810	1.58471e+06	998311	664731	2.26818e+07	1.55058e+06	755119	910777	322231	2.41599e+06	1.15376e+06	223080	1.16349e+06	1.33786e+06	454875	776814	1.87148e+07	2.17041e+06	580275	972797	1.30805e+06	584327	1.27962e+06	2.86091e+06	1.06261e+06	812996	267363	626157	515468	655886	259805	1.27039e+06	1.90483e+06	381128	771222	440094	908189	688180	377024	984834	605970	465799	524308
neg-3.647_245.0124	181096	139147	184968	199901	781342	289076	197470	175419	185015	209428	4.07903e+07	222511	585222	374480	256508	224419	1.24611e+06	286577	214198	182028	286936	310117	6.77235e+07	220671	264775	473364	770831	214254	261875	153806	1.57486e+06	275638	281638	180508	189811	614711	199456	147868	2.65739e+06	162703	251974	856470	179458	191369	232950	326357	179840	156584	652443
neg-3.647_619.10396	29813.9	25240.2	32971.8	82055.9	31843	36037.9	28071.3	65103.4	28296.6	32979	37286.9	43388	30604.1	24746.4	51840.5	1.53252e+06	21123.6	31349.2	35333.5	40186.3	63996	1.13786e+06	36969.6	221185	34419.9	21759.6	344450	26699.5	29886.3	26023.1	30774	32433.9	110003	26286.1	27027.9	25144.5	383236	25667.7	30007.4	26505.7	27111.3	104268	353761	50439.5	33528.9	38318	44654.5	26931.4	243831
neg-3.65_412.08366	537844	1.2427e+06	2.24363e+06	2.75736e+06	4.02338e+07	3.96793e+06	1.22176e+07	213265	1.02145e+06	1.37364e+06	8.55482e+07	362190	1.71955e+07	9.70444e+06	2.87681e+06	3.9643e+06	2.08313e+07	1.68959e+07	895937	3.59057e+06	830982	3.27476e+06	4.79288e+06	1.15851e+06	1.85262e+06	1.07875e+06	2.88908e+07	5.33661e+06	1.14532e+06	403281	3.62227e+06	634658	4.89427e+06	2.92194e+06	353070	2.04804e+07	3.52464e+06	1.20716e+06	8.56057e+07	1.58035e+07	683506	1.58877e+07	4.46834e+06	646785	1.07884e+06	1.18525e+06	944196	1.43153e+06	630461
neg-3.651_218.04274	91700.9	74561.5	88153.9	81355.8	2.09279e+07	3.48618e+07	119645	62187.5	4.72199e+06	113962	7.18012e+06	137370	2.76883e+07	94890.1	138492	1.88724e+07	55145.1	92187.3	1.83101e+07	2.72422e+06	204054	95990.1	169445	85298.5	106135	107025	92355.1	129662	84707.4	6.64379e+06	79577.7	8.39359e+06	152060	500590	74169.2	162327	146898	1.04337e+07	110871	146573	118708	296056	111284	5.17384e+06	88810.9	163670	70607.2	163320	83647.3
neg-3.665_252.02028	1.98886e+06	867015	1.28018e+06	1.29983e+06	362463	986742	1.08959e+06	1.60516e+06	998311	664731	1.0181e+08	1.55058e+06	4.27384e+06	4.51763e+06	308258	2.41599e+06	3.50889e+06	275670	1.31992e+06	1.33786e+06	784971	980652	1.07898e+08	2.31871e+06	580275	1.47005e+06	1.00966e+07	2.25284e+06	1.27962e+06	2.86091e+06	5.12512e+06	812996	443495	836269	538921	1.84197e+06	259805	1.35067e+06	1.22591e+07	1.43947e+06	840927	1.13511e+06	975770	715934	377024	1.03486e+06	605970	514949	524308
neg-3.673_538.11222	56410.1	55987.9	55853.7	80433.5	65978.5	709489	79455.4	70914.3	75753.4	119090	804974	89530.8	2.70145e+07	78686.6	78388.9	2.38607e+06	543295	181429	348758	73241.9	115453	1.58146e+07	80934.4	64697.6	106537	127354	337344	86208.4	105370	7.24878e+06	76217.8	169733	113322	368827	76373.6	100835	80254.2	477368	85466.5	61083.8	101386	74301	63084.8	395196	93731.3	85139.8	73074	57070.3	72681.4
neg-3.678_602.27493	264529	42125.6	42024.6	7.21822e+06	193713	1.459e+06	2.03121e+07	3.55284e+06	57023.7	130255	83815.6	723891	47691.3	1.49091e+07	674056	6.13783e+06	45280.3	3.0029e+06	1.74902e+07	637578	68738	51220.3	249875	48678.8	80158.7	2.39847e+06	1.5238e+06	64863.6	94124.1	41401	1.48382e+07	519372	85263.8	7.15204e+06	57567.7	46657.9	148736	97355.8	64742.9	112509	76283.3	148543	140288	444245	70523.9	64059.7	7.08294e+06	1.41537e+06	316775
neg-3.691_468.14926	782548	1.44917e+07	3.83103e+07	1.18685e+06	1.17929e+07	1.17654e+07	4.60366e+06	5.29118e+06	1.30433e+06	9.19298e+06	1.08065e+07	192279	1.06957e+07	2.98518e+07	3.46317e+06	1.48214e+07	597360	1.71923e+07	4.51764e+06	3.17567e+07	1.04397e+06	811127	5.37878e+06	1.15392e+07	227921	6.24991e+06	1.35361e+07	1.26558e+07	1.49725e+07	1.13234e+06	1.06032e+08	2.43999e+07	2.03609e+07	1.50669e+06	1.31793e+07	1.07814e+07	5.33225e+07	1.48097e+07	2.07568e+07	771782	5.42466e+06	1.74035e+07	932844	2.42462e+06	5.15185e+06	1.81464e+07	4.25683e+06	3.95581e+06	4.24342e+06
neg-3.695_637.14111	762404	264848	1.10125e+06	543385	400455	378385	295579	260142	244120	373510	290599	379903	630647	275135	230539	341666	1.76894e+06	277169	469587	659675	450947	371276	545645	865388	560573	232107	678630	337032	597578	215621	615019	442555	836392	196706	257902	1.19384e+06	792830	611125	266960	284263	407273	1.73724e+06	739525	428246	280138	949219	688008	486336	442960
neg-3.699_416.21028	128214	327203	3.04403e+06	343492	800423	3.70774e+06	1.85066e+07	5.07154e+06	282691	225035	85811	132280	809892	3.08376e+07	592860	9.84884e+06	153005	8.38372e+06	6.05197e+06	1.38257e+07	244672	582521	57495.6	574891	455009	6.75441e+06	7.16992e+06	131554	1.40398e+06	1.44435e+06	9.21771e+06	109577	368942	6.32324e+06	1.30309e+06	527558	473913	98193.5	294391	286578	178791	7.70034e+06	4.19782e+06	345999	130879	704608	2.34698e+06	595816	8.23359e+06
neg-3.699_479.20575	84727.1	86945	46017.2	220322	167968	404280	1.60491e+06	373858	69667.7	105317	48399.1	89956.4	52102.6	6.45062e+06	53555.2	461437	45856	875847	1.21485e+06	1.23354e+06	214237	206931	183864	170480	89178	902347	2.09747e+06	108020	229605	48107.8	2.53095e+06	398360	69248.2	789729	231585	43684.7	55733.7	62519.8	72497.5	46442.8	339374	1.03984e+06	564782	75459.7	62150.7	59123.9	219391	82332.1	587740
neg-3.703_337.15333	61752.8	369636	45074	126877	73450.3	2.56085e+06	55064.4	166174	289766	471144	348051	315360	1.68266e+06	525245	93853.3	556377	52495	226039	44978	3.24717e+06	308650	383621	59923.6	157290	191503	55846.9	55219.2	124002	91230.3	4.59977e+06	116740	125277	115818	307614	345523	219305	1.49956e+06	450862	140590	211318	491047	100749	425825	62441	245980	70190.8	5.07234e+06	93071.2	1.47938e+06
neg-3.704_373.11958	189624	306478	200621	237631	180368	236147	211316	147535	165145	345849	250361	230635	256260	411635	181727	253231	1.87215e+06	539634	139732	164800	387044	187310	156850	195761	235241	140910	99597.7	156419	238795	394199	162073	184314	375614	1.0377e+06	156569	203247	142893	114148	247025	119073	247252	138505	239484	164103	170069	169084	295192	210086	164186
neg-3.711_466.1958	172267	364493	273242	888849	156554	289428	535371	1.84514e+06	540414	1.32762e+06	155789	2.3253e+06	147250	723894	168961	279138	406453	728905	131494	502186	355459	1.34662e+06	296300	359245	954448	1.35875e+06	140452	612732	1.04237e+06	249150	178654	3.55242e+06	559276	429322	172588	144502	1.03726e+06	2.55326e+06	197689	131254	7.48034e+06	392304	1.40336e+07	335718	786373	249107	2.15469e+06	3.14871e+06	750664
neg-3.714_442.02082	60641.7	3.6397e+06	2.69503e+07	1.45613e+07	2.9089e+07	733209	1.1065e+07	5.34096e+06	3.93047e+07	5.48791e+06	48853.6	4.78486e+06	279092	360586	1.2035e+08	1.01077e+07	5.33462e+06	65293.5	46288.8	2.34293e+06	2.31072e+06	4.96513e+07	1.27601e+06	7.85287e+06	1.1867e+07	1.02609e+07	1.17419e+07	2.61453e+06	2.12027e+07	557644	483937	3.75821e+06	6.14604e+06	43829.5	565603	10022452	3.79643e+07	44293.4	169994	139775	3.54842e+06	6.81166e+08	9.53071e+07	1.47024e+07	8.59826e+06	6.00366e+07	689849	3.9624e+06	3.74029e+06
neg-3.727_506.01987	126039	119993	95152.3	189333	114007	185265	116242	118987	119526	163752	9.60154e+06	186008	244028	257767	92368.7	204231	93905.9	135707	96207.6	116717	220792	112653	315786	128104	134160	80500.8	205236	738540	124650	98260	172401	124785	140412	91096.2	109268	77513.4	131669	92060.4	527494	118358	132372	804833	86611.3	132349	114591	136367	136768	97574.7	115755
neg-3.728_358.10613	433571	3.06609e+06	611496	1.16326e+06	704928	804095	552467	898399	1.59232e+07	388248	834420	1.41517e+06	883652	387966	585376	352542	947789	7.07049e+06	555709	2.44623e+06	2.00688e+06	741302	413903	8.10256e+06	508104	1.88083e+06	182251	352138	5.1303e+06	405474	463709	545596	867218	388683	3.61284e+06	537109	630054	544970	4.51221e+06	2.41194e+06	194770	3.75963e+06	1.57789e+07	355763	407092	5.31593e+06	300284	318731	1.06472e+06
neg-3.732_338.14865	334381	97335.9	354948	1.56717e+06	235994	655348	451099	175312	332327	4.1281e+06	296967	1.10092e+06	405251	665739	253943	512091	540496	574211	241076	451815	943234	228638	297486	754828	1.53084e+06	496224	405150	453717	1.54407e+06	5.99827e+06	256387	991781	202244	276643	498116	132781	691179	381872	529693	135882	157045	484536	648355	770754	1.03056e+06	425679	321952	107780	1.05282e+06
neg-3.732_356.15894	1.23271e+06	1.66329e+06	926748	1.82579e+06	517620	650873	617462	781737	1.11216e+06	4.98968e+06	461364	1.76524e+06	1.28878e+06	890518	697326	1.0996e+06	704297	311790	624301	981431	1.01845e+06	611583	915413	1.09942e+06	2.47718e+06	906642	859962	1.20951e+06	1.56324e+06	7.04433e+06	1.33792e+06	2.39074e+06	278642	807861	485109	1.28117e+06	761680	838758	1.10924e+06	835920	969505	733286	1.18099e+06	1.04827e+06	1.2999e+06	1.11087e+06	389977	734821	1.17992e+06
neg-3.732_438.07401	48446.2	54866.4	38310.7	62959.5	44710.5	61317.9	43666.8	95691.9	46447.7	205389	49537.4	66966.6	36643.2	48835.1	35659.7	93384.2	37419.6	50435.9	42939	50046.8	72432.7	51510.1	50407.6	44843.8	51939.7	33034.4	40931	37576.8	205449	252321	44870	46471	43704	41653.5	34715.1	34335.1	41516.4	38331.2	41656.5	61163.3	43036.4	37813.9	35367.9	55720.9	73261.5	61478	62536.7	32935	535271
neg-3.736_176.04742	250543	5.28791e+06	267413	616391	1.43665e+07	4.16513e+06	338917	476360	4.06507e+06	1.31041e+06	5.21819e+06	787931	2.00717e+07	157958	232262	1.49697e+07	294790	3.83285e+06	1.45218e+07	2.05952e+06	1.60387e+07	327616	411630	3.18001e+06	1.83168e+06	411586	2.64494e+07	256429	448211	4.91007e+06	217140	7.5382e+06	335187	274887	1.28691e+06	705528	357332	9.42536e+06	264951	288817	1.75253e+06	1.06068e+06	192610	6.06742e+06	289695	313841	1.07924e+06	156127	375053
neg-3.736_220.03741	103503	50210.9	38026.7	62492.7	2.34145e+07	3.87221e+07	35716	100780	5.22483e+06	110550	8.21079e+06	57861.2	3.25588e+07	48473	116708	2.19552e+07	94351	50061.9	2.16772e+07	2.68554e+06	930037	50783.8	50609.1	44511.3	100197	32789.5	4.0099e+07	129662	39193.9	7.27414e+06	55890.4	9.34716e+06	43379.9	500590	34457.7	143001	41208.6	1.22789e+07	41347.7	37632	42717.3	38543.9	41527.5	5.97278e+06	42662.4	65646.6	62073	52794.1	88646.4
neg-3.739_293.127	1.11307e+06	667801	1.33712e+06	379593	150169	276574	288148	277148	1.21925e+06	1.73686e+07	940531	545032	849747	415172	372882	320072	396744	2.58451e+06	322099	791165	1.81818e+07	832932	69110.6	1.93425e+06	4.57053e+06	325098	968279	181214	326974	1.77633e+07	226656	284014	115241	659256	84146.3	1.57001e+06	374530	99843.9	238843	40184.6	618287	792839	457218	1.47112e+06	286504	282517	1.15896e+06	193670	175902
neg-3.746_313.11687	1.16995e+06	1.9038e+06	1.32977e+06	3.81601e+06	589720	2.76378e+06	408731	2.19562e+06	2.54525e+06	1.57997e+07	1.69629e+06	1.03514e+06	1.90724e+06	528820	850025	2.54478e+06	675677	1.7996e+06	603000	6.85792e+06	2.27044e+07	911246	901613	3.4114e+06	8.95944e+06	7.09234e+06	809291	882103	1.20736e+06	4.38614e+06	1.31934e+06	1.90574e+06	2.96887e+06	1.00319e+06	532667	1.65409e+06	1.43792e+06	802860	498079	1.03341e+06	3.99842e+06	1.06412e+06	1.5836e+06	1.52342e+06	675707	3.46795e+06	674182	1.1764e+06	3.27696e+06
neg-3.747_298.12501	501336	166728	221280	133297	2.11498e+06	78229.8	174454	240196	215671	2.59102e+06	53427.7	756883	135001	94912.2	65928.3	89632.3	47935.6	270638	55555.2	196830	2.81292e+06	534075	1.06209e+06	182371	609812	109272	142956	193232	264158	2.67586e+07	294877	517191	52224.3	93289.1	50593.6	224997	95771.1	402403	472874	38262.1	60064.7	116390	161298	397525	47368.1	85204.3	428215	39517	107243
neg-3.747_360.12172	241689	335428	383604	333124	521416	371293	143534	1.09535e+06	566651	458629	2.35963e+07	258581	1.67371e+06	196776	958972	429357	438992	297470	207543	436277	142510	498339	275493	433822	269211	1.31495e+06	538126	1.18167e+06	102740	525536	260325	228270	302250	2.31217e+06	112683	7.12907e+06	192988	267324	1.81595e+06	53589.1	305162	4.75712e+06	1.02121e+06	106909	619507	725697	624079	164851	360740
neg-3.748_297.12162	795213	402260	1.82933e+06	710961	360358	957666	444917	463441	5.53711e+06	2.35175e+07	619961	909820	1.32383e+06	759205	490945	784997	389444	3.36209e+06	305891	1.37013e+06	2.33804e+07	794976	241532	3.82447e+06	1.02739e+07	534111	703628	672640	606893	4.71721e+07	451504	631845	357696	216266	187318	2.80627e+06	491330	1.0572e+06	435990	310384	1.45802e+06	658862	1.02615e+06	3.57777e+06	471766	721122	418562	383947	468882
neg-3.749_395.05253	61037.4	51437.1	102704	67216.6	45459.4	58340.4	125821	37571.8	135937	1.46318e+06	58579.8	89127.9	110594	66148.8	55041.1	70024.9	32305.5	243068	49482	73254.4	1.09194e+06	139199	67999.6	146373	243181	44544.5	408356	54066.6	55337.6	829583	68855.4	66636.6	1.42406e+06	49470.7	43078.1	121879	74280.2	57132.5	62931.8	139840	65856.7	101160	54587.3	91881.3	48309.6	61698.1	55056	43327.7	50059.2
neg-3.749_397.04724	57856.6	48756.6	97351.9	63713.8	43090.4	55300.1	125821	35613.9	128853	1.39205e+06	55527	84483.2	104830	62701.6	52172.7	66375.7	30622	216318	46903.4	69436.9	1.09194e+06	131945	64456	138745	202379	42223.1	408356	51249	52453.8	829117	65267.1	63164	1.42406e+06	37933	40833.2	115528	70409.2	54155.1	59652.2	139840	62424.7	95888.3	51742.6	91881.3	45792	57179.3	52186.8	41069.7	44377.2
neg-3.752_234.02007	468993	707344	430786	1.56164e+06	81408.2	979246	486067	429009	376583	65727.9	5.85254e+06	714034	804981	1.72368e+06	322932	1.27602e+06	1.12721e+06	401985	798112	951256	247400	1.63801e+06	562954	176373	559217	1.2265e+06	1.70308e+07	4.41494e+06	159826	1.41143e+06	83603.2	212418	224659	947717	124603	332178	426578	2.09732e+06	368875	340099	839166	258521	575482	801899	204912	86457.9	267181	383891	281374
neg-3.752_291.11109	1.91185e+06	738366	440339	768063	458890	1.11908e+06	567878	937981	1.3154e+06	1.0326e+07	837735	1.19173e+06	698999	312083	392623	648156	561419	594846	805903	940025	1.52985e+06	792539	667800	1.07175e+06	3.00323e+06	822038	576144	908626	868571	2.59234e+06	776135	1.17719e+06	748062	542185	847878	756205	700689	501599	498616	790918	919134	1.05809e+06	1.06834e+06	1.18803e+06	857774	488229	602088	803930	3.1951e+06
neg-3.754_295.10627	768057	863738	810334	1.32467e+06	571834	1.66046e+06	598621	900273	1.35374e+06	1.51629e+07	605675	201499	1.22227e+06	755847	754268	1.10005e+06	205446	921572	588764	1.12071e+06	1.64823e+06	718853	324012	1.32107e+06	2.99692e+06	803559	620326	304846	837515	1.38024e+06	1.2075e+06	1.00489e+06	1.81464e+06	670891	910988	675906	645078	194417	579449	813839	1.24105e+06	974896	339820	1.75656e+06	457498	824862	241020	1.34616e+06	1.21742e+06
neg-3.76_251.11612	6.51811e+06	9.28515e+06	2.24685e+07	1.00038e+07	1.11275e+07	4.26115e+06	2.15169e+07	1.038e+07	1.28403e+07	3.3832e+07	7.81502e+06	1.86657e+07	1.41391e+07	1.09541e+07	1.31144e+07	2.58079e+07	1.48129e+07	7.77066e+06	8.86619e+06	9.72028e+06	2.71559e+07	2.80018e+07	5.14271e+06	9.18255e+06	2.16298e+07	8.9926e+06	8.2193e+06	2.44667e+07	3.93977e+07	7.77638e+07	1.35602e+07	1.26299e+07	2.12349e+07	4.31434e+06	2.4126e+07	1.36848e+07	1.50478e+07	6.3916e+06	2.29529e+07	1.03377e+07	2.23344e+07	9.99249e+06	9.82057e+06	5.324e+07	1.46787e+07	1.92346e+07	3.58108e+07	1.84447e+07	2.54166e+07
neg-3.761_619.33426	85277.4	62044.1	51268.2	254124	63324.7	81721.5	70209.4	73354.9	83472.7	94718.9	73863.1	137826	54395.7	73225.6	60721.9	126843	52313.5	139658	59330.7	81443.1	99312.8	135406	89887.7	75434.3	130034	68579	65234.7	80170	84593.3	998427	92129.2	94857.1	92804.3	66245.1	65543.3	372163	83431.1	81901.9	69664.5	55390.4	141222	76784	72896.1	99449.3	174848	86213	121709	206788	138005
neg-3.768_151.09972	66416	75469.3	40110.9	186987	49318.7	63646.6	54680.7	113808	191618	145627	57526.3	839337	42364.6	92155.9	57658.2	98788.6	56541.7	92960.1	50730.2	63429.8	240240	128697	70006.6	71025.5	157871	97524.4	66573.7	69119.6	65883.2	1.23409e+06	71752.3	111415	72278.1	51593.2	73100	72577.3	72660	73260.1	58795.7	46146	120876	59801.1	104033	68023.6	122367	67144.7	94789.5	66405.7	125707
neg-3.769_195.08973	807494	612399	585312	1.08212e+07	456120	933130	433451	730908	2.34629e+06	1.6517e+06	544292	4.41598e+06	543472	467914	684783	874475	713174	800235	439317	745726	5.37144e+06	967396	779124	742600	6.99833e+06	820799	777764	769547	1.3622e+06	1.26825e+07	658616	1.30387e+07	515931	567081	673594	254498	526439	656362	592543	545513	5.77721e+06	769142	713025	537375	1.04199e+06	901668	842981	1.63183e+06	387283
neg-3.769_501.22692	65941.5	123707	503006	6.55367e+06	48966.4	63191.9	121055	584823	649341	1.58837e+06	220648	3.63666e+06	56273.9	56622.4	57246.3	101253	40451.9	122642	146795	130743	1.73759e+06	1.16181e+06	71735.3	128276	1.46961e+06	520024	50443.3	68625.8	246799	548585	762407	1.33471e+06	71761.7	144259	335086	72058.8	111515	1.12457e+06	58375.7	168669	1.91309e+06	217108	820322	147857	85322.2	171035	1.47814e+07	2.60495e+06	3.47751e+06
neg-3.774_430.20314	631916	355213	219086	1.36974e+06	311636	1.47302e+06	592913	335235	735197	285182	205181	117560	144858	338897	194996	603002	232524	390627	76561.5	681411	4.44587e+06	1.94599e+06	150903	335277	2.52102e+06	768522	59256.3	250046	464529	302067	652380	1.15195e+06	235575	657718	505718	814874	1.71417e+06	511487	769762	132168	382964	234997	778231	294874	893798	1.11965e+06	3.2723e+06	367818	465279
neg-3.782_616.32368	132862	86072.2	51795.5	252855	67918.9	87864.4	70754	78753.9	80991.7	92035.3	210551	410551	61513.9	66014.6	71832.1	123073	78480.4	130606	332490	79022.4	590557	612495	100277	93683.3	434867	75267.5	79782.1	104182	120956	949191	104053	711644	90045.9	78261.9	118456	372163	90521.7	1.1502e+06	83067.9	62185.2	151211	80061.9	190778	168830	117338	91209.9	347166	136002	155852
neg-3.787_340.10217	158824	384415	130566	385408	324967	725679	258895	1.70793e+06	309736	1.50461e+06	218802	756246	241179	212148	266129	379930	354937	280686	164768	486357	299969	206715	176438	1.31986e+06	1.04528e+06	293411	132320	737473	221712	401199	108131	1.43605e+06	1.22058e+06	167701	279503	3.38943e+08	663672	648370	258334	1.76786e+06	582954	426979	1.12969e+06	175446	361029	1.97133e+06	2.56292e+06	115195	912687
neg-3.793_302.17324	3.37544e+06	946999	2.01226e+06	7.25239e+06	437166	8.37113e+06	554462	5.44884e+06	4.3658e+06	1.28814e+06	832272	2.6829e+06	2.44391e+06	1.13071e+06	889585	2.23704e+06	929769	932943	788623	1.03207e+07	1.31109e+07	4.72258e+07	1.86114e+06	6.50507e+06	2.00479e+06	1.62963e+06	603130	2.42691e+06	5.87096e+06	7.20811e+06	486307	3.83024e+06	1.03768e+06	835864	2.02482e+06	1.77457e+06	4.01779e+06	3.08389e+07	1.87328e+06	701873	1.13178e+08	872676	8.01457e+06	7.46694e+06	2.45855e+06	7.90695e+06	7.70128e+06	1.57899e+06	2.88304e+06
neg-3.796_402.09871	156060	71440.2	39391	436167	64007.8	82991.2	298924	62142	73873	365834	173506	97715.6	385682	102540	52872.6	65856.4	62549.9	156140	481341	125858	226620	1.73396e+06	291316	127187	343138	206900	62953.3	88894.4	95442.5	259790	82104.5	93245.8	1.01524e+06	51737.3	93469.7	85311.3	156740	1.94595e+06	196394	152936	4.31374e+06	59182.4	306053	133218	883578	75129.6	90474.2	209540	100763
neg-3.797_425.12311	233624	159201	87780.7	276159	132506	1.23303e+07	107062	479500	126108	491903	386650	217754	2.55448e+06	127796	117824	646684	205072	229655	383067	102704	182602	3.75709e+06	297700	153792	2.37245e+06	107695	1.87624e+06	183192	212689	1.82714e+06	182966	194790	390820	387005	208292	340701	121498	140842	157208	99845.8	252004	131885	133219	2.47656e+06	234495	167422	172897	161021	224546
neg-3.815_648.31856	285086	69997.2	329290	120627	1.58344e+06	4.16896e+06	45519.3	64370.7	4.29674e+06	90662.6	114684	91017.9	52847.7	245129	3.54523e+06	45758.6	52902.1	326148	102456	52115.4	98480.7	120884	71090.5	60777.2	203272	84802.6	139978	61013.8	93314.7	1.19687e+06	76104.6	114541	48437.3	85152.2	70211.7	180177	57056.4	111813	63830.1	502060	122929	1.43375e+06	63407.6	1.14121e+06	289412	1.70427e+06	2.55018e+06	51335.4	85454
neg-3.819_393.15431	85569.8	280137	199046	268165	147315	427773	343570	686934	595116	5.20907e+06	139035	154015	64069.1	304066	393129	112739	265122	371624	139267	128857	156022	146552	180588	234915	833927	376793	153028	99575.3	1.1457e+06	639499	124120	359109	497399	103233	204355	157626	445238	135555	251219	297473	268395	515582	323411	339609	687293	221069	594139	268924	1.51187e+06
neg-3.822_225.10043	1.1203e+06	1.25525e+06	850568	6.71099e+06	622135	1.54312e+06	820722	1.24476e+06	2.73837e+06	3.40107e+06	1.67452e+06	2.1494e+06	1.22404e+06	781538	779162	2.49683e+06	1.46167e+06	2.87333e+06	794404	1.74477e+06	6.36432e+06	5.36583e+06	1.67326e+06	1.48146e+06	8.17838e+06	2.42747e+06	2.61612e+06	925848	2.64225e+06	6.71087e+06	423690	3.26268e+07	1.33414e+06	2.65764e+06	485237	939262	3.41509e+06	2.24103e+06	733312	1.60999e+06	2.32346e+07	2.63745e+06	7.32817e+06	1.53683e+06	1.56905e+06	1.61225e+06	2.4591e+06	1.54075e+06	1.02502e+06
neg-3.841_412.14102	793171	1.36302e+06	4.98706e+06	177395	1.67571e+06	338524	798684	203853	223970	174073	638985	185692	237220	172520	1.41473e+06	1.60127e+06	792269	3.91089e+06	237264	161400	187107	255272	3.54004e+06	230256	254126	228858	1.36228e+06	1.81744e+07	272224	331718	708547	231694	1.28716e+06	6.602e+06	233307	1.89269e+06	136800	212437	6.52655e+06	1.67822e+07	259594	597609	347001	229754	349976	785698	376503	270756	1.00554e+06
neg-3.843_352.16404	813451	999327	919334	1.22811e+06	303497	794759	413905	656300	1.48998e+06	2.6645e+06	558624	1.04943e+06	532621	417424	455905	983180	387310	644291	315800	763102	1.09398e+06	974311	412557	431989	2.81085e+06	390383	513727	104181	3.50504e+06	7.73862e+06	341307	1.9558e+06	449246	145345	672041	3.35432e+06	434803	407851	845668	182488	874679	491349	956978	968531	1.33047e+06	921053	159152	821263	1.21984e+06
neg-3.843_508.1988	524785	369253	294134	385332	4.02177e+07	6.98063e+06	470631	685328	3.70263e+07	319950	6.59933e+06	1.85466e+06	4.95908e+06	356125	207961	9.91782e+06	261610	350661	1.01819e+07	273089	514785	1.49761e+06	250120	338852	488573	416090	1.08072e+07	537220	6.65533e+06	7.84513e+06	323161	1.0698e+07	272239	385596	288425	3.68284e+06	362235	1.24833e+06	652975	330077	754628	604245	269480	388744	671806	370667	563722	297940	491491
neg-3.844_718.15522	90597.6	92260.3	73711.9	103825	182413	3.93741e+06	302411	1.27576e+06	1.45576e+06	6.06295e+06	74928689	113215	7.74367e+08	157225	74936	1.62632e+08	94267.7	126356	3.45402e+08	98404.1	111554	1.14073e+06	234883	122101	140205	139533	2.23716e+08	104764	112981	1.72733e+07	99739.2	1.28456e+06	98097.8	114756	77517.1	97942.1	83405.7	782882	119987	86285	151015	476169	89237.3	8.59729e+06	145561	130593	160043	107359	177103
neg-3.845_520.10158	82626.4	84142.8	67226.3	94690.1	73229.5	232192	123563	113352	124538	92943.3	2.82786e+06	103254	2.66899e+07	95929.2	68342.8	6.86004e+06	85973.5	115239	1.06895e+07	129523	101739	243172	80414.6	111358	107570	127256	8.94231e+06	95546.1	103040	129688	90963.6	111841	89466.6	104659	70696.7	89324.6	76067.2	101532	109430	78693.2	107714	633210	81385.8	376741	132753	279681	145961	97912.8	161520
neg-3.846_340.05868	178275	181134	144718	203839	157641	482973	265993	244013	281677	200079	3.06783e+06	222274	3.93643e+07	206507	147121	8.36281e+06	319347	248074	1.07689e+07	193196	311059	305561	173108	239720	231565	273944	9.86938e+06	205682	221814	2.8901e+06	222050	240760	192595	225299	152189	192289	163750	549617	235570	216792	231877	253990	175199	616980	285778	256392	314211	210777	444972
neg-3.846_490.18804	406331	809005	173098	133622	3.97869e+07	6.71197e+06	206147	457272	3.49024e+07	158790	6.3792e+06	1.32403e+06	4.5721e+06	177601	96441.8	9.51958e+06	131026	162619	9.62696e+06	126645	194207	200303	113477	157142	573886	226913	1.03394e+07	134830	6.29104e+06	7.22979e+06	149866	9.70165e+06	126251	147689	124131	3.48536e+06	253612	143277	264282	123582	194355	166497	119490	180280	187335	175276	205973	153447	227929
neg-3.847_518.10744	174186	90674.2	172905	102040	116251	283936	133154	122151	134205	100158	2.98125e+06	111268	3.10595e+07	103375	176328	6.49861e+06	92647	124184	1.02122e+07	139577	109636	304183	86656.6	120002	115919	137134	9.30293e+06	102963	111038	1.22868e+06	114445	120522	96411.3	112783	76184.4	174069	81971.7	144740	117925	84801.5	116075	400652	87703.1	376741	143058	307208	157291	105513	195357
neg-3.848_359.0777	173101	175494	140212	197492	254123	4.12175e+06	490106	1.38676e+06	1.57772e+06	6.15397e+06	7.50391e+07	202195	7.75765e+08	250521	142540	1.62798e+08	179312	265026	3.46191e+08	187180	212194	1.29232e+06	315757	232255	224354	265414	2.24183e+08	199277	214907	17780159	221501	1.39408e+06	218957	218087	147450	186301	158651	868537	228235	164128	224656	591709	169744	8.7224e+06	276879	248409	304427	204214	336877
neg-3.849_322.0483	83184.8	84334.5	67379.5	94905.9	73396.3	188665	123844	113610	124822	93155.1	1.88074e+06	97166.1	2.56787e+07	94030.5	68498.5	6.37037e+06	86169.5	115501	8.43727e+06	89950.5	101971	133032	80597.9	111612	107815	127546	7.66128e+06	95763.9	103275	352281	106443	112096	89670.5	104696	70857.8	89528.2	76240.6	87668.2	109680	122111	107960	118256	81571.2	340569	133056	119374	146294	98135.9	250635
neg-3.854_368.15907	80327.5	149975	65065.1	305497	268929	182184	217437	130337	353968	387131	109102	265237	127665	94417.7	131397	150917	83209.7	111534	78258.1	97128.7	164922	140615	155096	233586	184263	156977	198350	171913	99727.5	1.69571e+06	102787	297155	86590.5	101100	115494	177199	73621.8	84656.9	114278	190130	235016	137460	132591	324194	372404	234349	141269	216216	337823
neg-3.856_428.20556	1.03941e+06	3.06674e+06	938256	442222	780252	641174	490946	386103	424206	679648	496194	9.81201e+06	776626	699694	461517	791845	310904	793648	387435	2.12794e+06	1.14029e+06	483492	1.2207e+06	979972	1.24942e+06	1.29804e+06	516882	1.60687e+06	606023	613861	3.09843e+06	535230	304744	356492	876860	972063	303377	712059	1.29511e+06	867455	1.02407e+06	680724	1.56528e+06	435160	1.03272e+06	465015	916675	1.63777e+06	887338
neg-3.861_562.13297	7.45399e+06	202427	550180	227801	1.03081e+06	482951	297262	1.76292e+06	299609	223599	440844	248403	1.7032e+06	230782	164416	286416	206831	989342	203860	241430	260272	341481	4.47646e+06	513769	498450	306147	241639	229861	389303	311997	8.20907e+06	7.5235e+06	215235	580714	288843	214893	182999	1.40664e+06	263263	222724	283822	845856	195794	307345	319372	286532	351148	235554	388578
neg-3.866_267.11105	6.29568e+06	1.902e+08	4.36348e+06	11675198	1.10503e+07	1.35625e+07	752735	8.17462e+07	5.23196e+07	8.84648e+06	5.03633e+06	1.01411e+06	2.14261e+06	459347	9.75427e+06	1.06646e+07	1.19867e+07	513100	1.66161e+06	780221	4.0963e+06	2.0908e+06	1.20459e+06	1.13002e+07	5.51995e+06	8.40648e+06	1.31813e+07	5.98994e+06	1.65487e+07	5.445e+07	248901	5.44173e+06	9.56076e+07	1.04556e+06	1.38535e+06	4.8185e+07	9.05547e+06	3.43999e+06	3.53826e+06	1.85024e+07	7.02783e+06	1.50052e+07	2.34269e+07	5.98438e+06	4.45219e+06	1.51173e+06	2.12934e+06	4.18269e+07	1.17061e+07
neg-3.868_302.17233	6.72684e+06	6.91985e+06	803206	1.45906e+07	365681	2.71665e+06	5.59222e+06	2.54789e+06	2.29367e+06	1.42423e+06	2.62568e+06	2.4453e+06	785301	345852	1.42415e+06	1.23855e+06	737212	1.27561e+06	853497	744301	3.9573e+06	4.50094e+07	233860	1.2858e+06	2.80669e+06	2.5404e+06	704201	845685	4.34028e+06	6.76871e+06	506509	1.80624e+06	946696	6.95419e+06	1.42057e+06	1.37631e+06	1.12557e+06	3.03907e+07	313222	1.5271e+06	1.04764e+08	792749	8.24753e+06	1.454e+06	1.22704e+07	2.53809e+06	1.8e+06	807294	9.60812e+06
neg-3.876_287.11632	3.75983e+06	651622	5.91723e+06	600951	4.17802e+06	1.17841e+06	621036	817386	681837	382186	562644	212526	770237	534138	780917	845317	595304	313718	859489	945583	260361	282917	369141	757925	1.42692e+06	459718	1.23093e+06	1.2973e+06	1.15733e+06	1.00231e+07	689896	156801	633991	1.55764e+06	769254	623691	575932	883379	5.90861e+06	706344	341114	1.16443e+06	853638	1.16442e+06	239978	423358	764862	280648	918286
neg-3.895_346.10898	525016	852300	2.16088e+06	1.35209e+06	1.53033e+06	3.94496e+06	953785	1.70433e+06	1.13218e+06	8.22354e+07	2.75977e+06	5.0982e+06	1.39495e+06	2.45953e+06	2.34857e+06	554939	2.44343e+06	2.19812e+06	1.04766e+08	5.16944e+07	8.85806e+07	7.77718e+07	1.17004e+06	8.47852e+06	4.87253e+06	6.6068e+06	263346	1.32392e+06	4.97649e+06	2.06878e+08	1.26456e+06	281071106	2.35833e+06	2.0874e+07	846425	1.05782e+07	351434	259869	1.97552e+06	2.87285e+06	1.51406e+06	1.31808e+07	2.78361e+08	634022	4.29837e+07	6.78351e+06	3.86236e+06	822557	2.74931e+06
neg-3.896_344.11462	309126	669360	534946	935664	3.58154e+06	3.67435e+06	356264	980648	542137	8.7479e+07	1.8818e+06	4.95789e+06	948869	229595	1.04721e+06	124650	2.5373e+06	1.27042e+06	9.95751e+07	5.06924e+07	8.50432e+07	7.70156e+07	1.85744e+06	6.24552e+06	5.08438e+06	1.61392e+07	542465	587214	2.69585e+06	293674	2.92637e+06	2.68266e+08	2.37499e+06	4.27029e+06	226258	1.14264e+07	468254	97320.4	2.34656e+06	794509	2.31952e+06	1.24737e+07	2.84887e+08	340984	4.34101e+07	1.89911e+06	3.22916e+06	466747	2.783e+06
neg-3.897_300.10397	760441	586669	884887	1.70139e+06	1.10444e+06	3.20961e+06	633086	1.16968e+06	500080	8.22273e+07	3.33918e+06	5.25398e+06	880084	1.64909e+06	1.44612e+06	343112	3.00471e+06	2.43938e+06	1.03894e+08	5.27078e+07	8.86797e+07	7.77615e+07	863225	7.01491e+06	5.05081e+06	6.1997e+06	375280	197339	5.10435e+06	248772	1.11053e+06	2.81059e+08	1.38286e+06	2.09415e+07	89809.6	1.04215e+07	276710	549314	1.87356e+06	670342	1.57694e+06	1.31292e+07	2.7839e+08	1.56487e+06	4.29713e+07	2.59486e+06	3.8614e+06	249072	2.81364e+06
neg-3.897_399.10759	57488.2	76774	59878.9	87976.2	878624	75394.9	178172	63218.5	93528.3	101838	175860	85486.9	323226	47704.8	101269	67176	2.98525e+06	630822	65340.5	92999	167714	128846	69688.1	56582.4	199775	52546	78021.1	78143.6	61625.3	54245.2	72921.6	151508	297170	242488	47197.8	2.35817e+06	167239	184797	545832	151758	158076	47246.2	111213	160572	94920.8	78435.1	67475.2	85342	89484
neg-3.899_255.09854	682836	574780	202818	253915	3.1257e+07	814271	1.22866e+06	205796	6.83401e+06	913745	4.44768e+06	385885	468864	197031	105274	3.58184e+06	3.0416e+06	154466	9.29486e+06	477558	981226	290578	157164	1.43837e+06	514389	170512	9.86465e+06	176233	1.07504e+07	1.45643e+07	407485	9.45115e+06	137857	94849.1	120268	1.85443e+07	174420	127775	127856	117590	383753	244340	153231	215762	455570	720670	457395	754575	217888
neg-3.9_392.07542	54232.2	510544	49463.9	2.21179e+06	310285	2.94649e+06	193526	1.23876e+06	88284.1	9.87657e+06	217316	164696	854495	53853.2	96288.1	535623	513044	441511	104950	84592.7	675665	440268	65780.6	194088	568852	109346	73646.4	72704.1	54514.5	728331	59311.8	109341	511118	1.36273e+06	44551.4	305671	73003.3	548642	187828	48837.4	228001	239818	788872	587710	89598.5	465851	2.67516e+06	2.20474e+06	323712
neg-3.9_622.33986	172334	2.73008e+06	626224	5.18629e+06	1.04466e+07	3.94302e+07	311448	1.00815e+06	4.89829e+07	3.47067e+06	674464	868468	649607	318509	90683.1	1.62955e+06	106223	1.15973e+06	1.46075e+06	6.05285e+06	1.2193e+06	3.34125e+06	172067	628749	7.83469e+06	181405	1.171e+06	192945	978805	2.66221e+07	282212	1.78225e+06	254464	343246	179410	258290	278374	2.15515e+06	130455	127747	853721	158677	2.03864e+06	7.9029e+06	460227	264460	1.83945e+06	2.91312e+06	715414
neg-3.902_582.28722	3.05636e+06	1.06206e+07	370443	97233.4	4.84792e+08	2.08245e+07	212497	163545	477310536	112553	5.01308e+07	196000	2.74493e+07	998116	50423.3	5.65293e+07	2.15408e+06	247567	3.79985e+07	235228	350908	102994	95958.1	114997	169462	189511	7.97876e+07	284400	256766	7.77471e+07	577540	1.09087e+08	67559.4	351774	157271	1.17715e+06	301411	75476	384470	263708	118835	308947	75093.6	646336	189717	95343.3	133336	123890	98899.8
neg-3.905_268.09852	196233	1.01589e+06	96872.7	2.60653e+06	568610	855905	477934	1.45882e+08	597885	3.76564e+08	554364	920511	1.20329e+06	188194	427185	828605	72204.1	3.65518e+07	326276	1.0679e+06	4.28455e+06	1.29537e+06	905553	2.66264e+06	349151	1.31069e+06	1.64604e+06	1.75112e+06	942942	3.68342e+06	1.40084e+06	1.0273e+06	1.07495e+06	109097	171340	235026	220372	483592	269929	237676	1.39157e+06	169526	826246	117571	109260	254744	867119	787851	2.28438e+06
neg-3.907_453.15792	731381	4.99015e+06	8.50588e+06	781103	2.97312e+06	2.77114e+06	1.92656e+06	1.98436e+06	926793	3.31999e+06	3.08093e+06	316282	2.24095e+06	1.67208e+07	1.38004e+06	6.75276e+06	647372	3003963	3.93932e+06	9.28783e+06	248674	298871	3.72528e+06	6.55597e+06	463400	2.83412e+06	7.0597e+06	7.9417e+06	3.88532e+06	174091	4.21757e+07	2.54592e+06	7.67352e+06	2.64854e+06	7.1316e+06	3.29025e+06	3.51801e+07	7.90868e+06	7.29442e+06	1.6525e+06	342965	6.06346e+06	157604	2.45928e+06	1.32504e+06	4.977e+06	156516	2.60743e+06	2.75257e+06
neg-3.908_210.13722	421581	427499	166876	619865	150817	160764	79869.7	587780	369482	828145	536123	2.39725e+06	106253	95943.4	198196	221399	301406	412736	291840	194084	469455	838663	309922	448682	920155	159161	187096	143722	185998	367253	114341	921011	236105	321378	516561	122573	365599	1.86964e+06	163606	226952	2.38916e+06	621660	608289	584361	705759	327178	756675	847477	126266
neg-3.911_452.15431	5.98204e+06	2.77868e+07	2.7359e+07	3.43102e+06	1.55277e+07	1.66731e+07	1.14156e+07	1.44496e+07	6.01774e+06	1.98929e+07	1.90203e+07	424976	1.08954e+07	7.33611e+07	9.57806e+06	3.50552e+07	6.49674e+06	1.24755e+07	1.38836e+07	5.40485e+07	244871	294301	2.1517e+07	3.18114e+07	514306	1.69457e+07	3.9635e+07	4.68843e+07	1.85085e+07	8.57263e+06	2.46403e+08	346066	4.45647e+07	1.66385e+07	3.67859e+07	1.85409e+07	489114	142404	3.78608e+07	1.06818e+07	426835	3.48599e+07	609736	1.28358e+07	8.15071e+06	3.78077e+07	7.56009e+06	2.10953e+07	1.55372e+07
neg-3.934_360.15819	102166	61485.7	2.03658e+06	170760	1.04885e+06	1.4531e+06	327360	132977	360140	295803	63028.9	90722.4	4.65824e+06	56364.3	1.00028e+07	622058	145290	280845	46341.9	120473	117029	60765.3	1.28468e+07	174925	87431.2	364610	4.19982e+06	4.35998e+06	1.06737e+06	6.56886e+06	89363.9	320806	372674	657954	253565	1.01534e+06	53450.7	282744	1.85915e+06	1.05621e+06	300620	646743	236945	237428	176314	86803.7	125755	251786	243357
neg-3.934_366.00517	75944.9	156895	77440.9	87706.7	98512.8	95255.8	123539	189126	85082.6	272547	202482	126235	171780	101198	74085.8	79543.7	286297	506555	532292	265555	134276	298952	206116	93659.7	100316	197985	62776.6	88749.8	757029	221689	75716.9	174353	72565.8	415230	62221.5	86379.5	61328	80803.9	189793	925022	84262.2	89517.9	1.4208e+06	87544.9	75249.6	99596.5	65143.7	95224.9	77454.8
neg-3.938_350.10413	547680	134331	92122.6	199579	71303.4	156801	70088.1	180201	475392	171956	532543	1.23647e+06	314870	81818.9	1.49244e+06	497687	73888.9	234770	59583.4	175008	476993	120514	86668.5	102288	7.26385e+06	349939	68559.6	209631	163277	1.70055e+06	92622.8	249889	86991.5	61526.3	67953.3	60449	106141	181469	188007	158124	178894	194033	89809	95609.5	644555	151267	241281	111655	89926.1
neg-3.938_358.19779	84208.9	98652.1	89230.6	121061	72393.5	105621	221374	484894	151729	8.96572e+06	135373	193032	91272.6	83069.7	217880	88199.2	90200.8	185933	60494.2	94986.1	148888	101522	127275	103851	587852	164795	103689	157123	1.77512e+06	2.95381e+06	167273	84290.9	192808	62466.8	582530	157626	205991	89596.5	483529	73664.8	93431.3	113647	223283	262868	156499	123058	77753.4	83572.1	316796
neg-3.941_338.1487	548760	508270	1.10984e+06	517940	480340	1.47009e+06	181262	757553	1.12026e+06	749261	260612	462997	292255	761264	1.11687e+06	413594	1.20462e+06	2.18339e+06	103965	306280	365586	254401	725708	2.76267e+06	706591	515441	302850	544460	649494	3.60819e+06	316132	521266	168187	348063	460386	254476	696781	294381	1.8058e+06	661260	361143	2.73612e+06	404704	667475	502889	3.02274e+06	225259	305945	553583
neg-3.944_396.15374	231883	114781	167265	230074	132369	122889	93890.1	148624	176535	336849	101681	622244	160327	96650.8	78999.4	102619	125229	100890	117914	148055	262690	118120	148083	120830	153614	377472	80987.9	155143	129593	3.00639e+06	168405	184703	93616.8	148153	140523	93228.2	81451.7	138578	111031	85708.4	108706	218525	188336	458323	182085	170570	90465.4	108910	125995
neg-3.948_464.09697	69137	80995.1	73259.9	94721.6	59436.4	86716.8	58423.3	69133.6	327696	2.27798e+06	71750.9	114919	65686.7	68201.7	54219.3	773727	48348.2	71192.8	54717	77985.3	122239	63470.7	81237	85263.8	91323.8	72821	106074	80794.1	91447.6	2.92537e+06	90885.9	71982.7	66060.7	53963.7	89933.2	627375	57476.4	73560.4	74151.8	60480.2	76708.7	66371.2	74862	79697.1	68504	999651	59304	68614.2	74959.6
neg-3.949_323.62227	679719	126377	2.57831e+06	5.48895e+06	70118.4	102302	109409	161145	297573	787771	1.32494e+06	501706	104098	90873	149137	85427.4	71650	387486	301484	6.36768e+06	144286	74877.8	1.39653e+06	647336	107737	2.11192e+06	67420.1	2.30578e+06	6.95885e+06	66934.8	144496	490182	347988	202624	66823.9	78868	135380	175529	254662	71349.8	148976	78299.6	294766	542132	80815.7	1.86211e+06	69962.3	220300	4.08808e+06
neg-3.95_366.17961	2.61108e+06	1.43633e+07	9.47467e+06	4.32723e+07	7.08859e+06	1.01299e+07	8.37468e+06	4.05291e+07	4.91102e+07	9.61654e+07	5.75073e+06	3.76056e+07	1.22071e+07	2.27203e+07	3.64331e+07	7.68049e+06	1.33354e+07	1.08316e+07	2.79449e+06	7.81154e+06	2.97278e+06	5.08492e+06	1.21767e+07	1.98327e+07	8.43756e+06	1.51871e+07	9.34425e+06	2.39991e+07	3.70885e+07	7.72774e+07	1.83075e+06	1.73313e+06	2.99835e+06	1.76986e+06	1.19191e+06	5.45855e+06	8.31044e+06	2.83552e+06	4.44135e+07	2.89117e+06	4.86906e+06	1.05201e+07	4.36431e+06	7.51808e+06	9.43207e+06	7.91927e+06	3.49409e+06	1.31693e+07	3.19685e+07
neg-3.952_363.18031	121997	98968.6	307797	867863	105631	128736	120174	469044	4.20875e+06	3.09002e+07	233387	1.75325e+06	231784	762318	395842	188158	850080	1.06141e+06	225886	185497	1.68561e+06	2.71046e+06	146455	144714	3.1856e+06	593231	1.46403e+06	205518	352044	5.67199e+07	88007.4	402984	178496	349879	365446	3.14743e+06	419352	261338	281341	266313	749553	487334	277430	1.76054e+06	623264	248499	205778	513065	674464
neg-3.952_452.15436	6.10358e+06	2.81047e+07	2.76235e+07	3.59754e+06	1.56615e+07	1.68255e+07	1.15183e+07	1.45711e+07	6.16969e+06	2.00725e+07	1.91465e+07	605953	1.11855e+07	7.39183e+07	9.67338e+06	3.54005e+07	6.58173e+06	1.26006e+07	1.40192e+07	5.45573e+07	605114	304788	2.1698e+07	3.19613e+07	478811	17073727	3.98073e+07	4.70726e+07	1.87172e+07	8.67238e+06	2.48263e+08	1.14952e+07	4.49424e+07	1.67334e+07	3.71096e+07	1.86779e+07	1.81596e+08	4.6399e+07	3.82167e+07	1.07881e+07	4.11522e+06	3.50586e+07	2.1447e+06	1.46342e+07	8.27114e+06	3.79853e+07	7.66435e+06	2.12159e+07	15708416
neg-3.952_466.105	109554	195865	83426.4	91578	57463.8	94895.1	91218.2	66839.2	365168	3.04501e+06	1.98872e+06	111105	234217	450178	52419.8	67483.6	703399	241944	115377	768086	112001	244915	4.62232e+06	82434	88292.9	83618	2.40913e+06	322760	88412.6	4.08575e+06	334894	69593.7	63868.3	130994	183474	532236	55568.9	137091	800795	115898	87106.2	64168.5	72377.5	209945	70918	164904	117663	385008	113398
neg-3.958_365.18071	1.78983e+06	3.49337e+06	5.65679e+06	547073	419025	538490	731887	317443	4.60102e+06	3.29193e+07	210459	2.96903e+06	237497	1.65446e+06	2.77445e+06	595706	6.09283e+06	1.80767e+06	690361	815391	1.6595e+06	1.00481e+06	3.59423e+06	469653	3.02179e+06	1.49612e+06	1.28104e+06	1.73714e+06	256475	5.8238e+07	3.59585e+07	225906	964001	893171	1.08522e+06	3.38587e+06	944654	1.54743e+06	1.17794e+06	1.20187e+06	630523	1.68695e+06	859635	2.2086e+06	526884	3.18217e+06	1.09867e+06	293376	711563
neg-3.959_360.17727	59594.8	75227.1	53413.5	61582.7	261727	67835.3	51970.2	49411.1	110813	153992	63825.8	98761	48519.2	264633	40875.7	62090.5	78607.7	57580.8	54523.2	61265.9	103050	55388	91582.2	66047.5	76594.3	79100.3	50745.4	67392.2	76435.1	2.682e+06	106719	64032	55799.3	48003.2	40556.1	42804.3	51128	65118.2	60704.1	51959.7	61273.9	53096.9	57758.2	166882	83794.7	89873.2	46880.6	61035.6	66680.1
neg-3.968_392.14801	222439	292885	1.80097e+06	279957	774822	2.03156e+06	2.51078e+06	429965	307008	830649	1.25352e+06	254903	3.07254e+06	429494	2.11676e+06	434415	635675	3.01768e+06	1.03852e+06	6.67884e+06	526258	180364	645268	222001	191339	387025	1.63199e+06	421473	555757	8.4844e+06	362685	413512	478271	1.2983e+06	411409	1.64263e+06	2.29687e+06	689187	845858	622184	154222	1.05529e+06	5.47483e+06	644237	2.30401e+06	392846	737008	159594	1.30683e+06
neg-3.971_314.07986	547408	243746	165257	143662	169939	5.827e+06	117008	217416	406550	380932	384722	510804	7.90057e+06	214783	216901	2.85788e+06	255651	287218	457924	558759	660686	827844	234394	478271	167119	156899	280794	261603	220825	1.49788e+07	266605	1.07866e+06	160871	317550	212608	444363	147213	1.34054e+06	190379	258594	178786	316325	360718	7.30169e+06	389257	322288	376809	132270	169777
neg-3.973_401.14404	60998.7	501530	59270.1	59926.6	121911	69896.7	50286.5	63652.7	97240.2	84552.6	69371.3	81378.1	52123	92307.5	49071.2	55638.3	79278.3	64939.7	58786.4	63255.2	64304.8	54183.1	93739.6	71871.3	65909.2	309981	63779.8	85182.1	94904.3	326893	113472	65160.8	266783	61329.6	45086.8	202704	63268	55700.3	81819.6	48321.4	88012.2	64652.2	48010.4	51502.2	92140.9	87529.4	127516	46202.3	274882
neg-3.974_649.25986	76317.1	284070	84094.8	1.30041e+08	569291	365277	512058	74554.1	401004	5.60724e+06	2.82694e+07	95315.3	3.06505e+06	171831	1.02964e+06	958705	54687.2	805750	2.65877e+06	6.4915e+07	75317.9	73851.9	2.24696e+07	6.21341e+06	77197	3.09504e+07	74702.9	2.41013e+07	8.49563e+07	64843.5	135126	6.45622e+06	4.31315e+06	53779	52808.6	58574.5	74103.5	2.39527e+06	8.85211e+06	70856.2	103085	147927	56232.9	60322.7	55859.1	102520	83079.1	100321	8.26856e+07
neg-3.984_602.31388	185944	1.33692e+06	562498	481692	6.72722e+07	1.52581e+07	529295	1.09241e+06	8.59612e+07	511722	7.38925e+06	646954	8.34868e+06	1.34347e+06	544351	6.23466e+06	1.00362e+06	916035	1.45399e+07	1.53213e+06	1.97309e+06	1.82111e+06	398084	2.64445e+06	361050	198881	7.7714e+06	243087	1.15059e+06	2.63046e+07	402773	2.64695e+07	2157062	242474	269940	731789	412204	2.45394e+07	418603	137896	576789	610225	604879	1.38637e+06	543151	692853	1.35443e+06	2.60336e+06	371744
neg-3.987_570.08103	84955.9	129090	77279.1	118952	149817	91134.5	65565.9	82993.3	95418.7	286943	90449.5	141203	445863	120355	57722.5	72543.8	60877.6	252896	287875	87618.7	98531.5	570234	447150	84955.6	87924.6	87919.3	1.71062e+06	111064	121797	69208.1	150421	804415	58169.2	397528	58786.3	102222	82491.7	99548.1	549925	58465.5	130351	104037	2.71636e+06	63214.3	131698	114125	75158.1	93395.6	95135.5
neg-3.99_382.17476	2.53812e+06	3.62385e+06	3.67799e+06	2.81632e+06	2.67487e+06	882066	2.65067e+06	1.88826e+06	1.18465e+06	9.5797e+06	1.88068e+06	1.16751e+06	375692	3.52721e+06	856696	2.34814e+06	677010	3.85876e+06	677128	2.15865e+06	6.55409e+06	6.37099e+07	1.15644e+06	1.74606e+06	4.45586e+06	1.6747e+06	1.6762e+06	1.55361e+06	2.15264e+06	1.41318e+06	2.1215e+06	2.46431e+06	953039	1.82515e+06	1.22136e+06	1.75065e+06	5.80685e+06	1.17483e+06	1.44835e+06	853588	2.15701e+06	1.49401e+06	2.11645e+06	1.54812e+06	3.45482e+06	1.11621e+06	3.10307e+06	1.84882e+06	1.5286e+06
neg-4_492.10681	69511.7	86385.2	55565.5	108688	67218.7	250349	94381.9	1.23353e+06	81687.4	1.2045e+06	2.25663e+06	125639	3.66799e+07	73974.1	47986.3	5.96427e+06	47773	70628.8	4.75066e+06	677103	87670.8	276734	84765	59700.5	80993.3	62796.9	1.03073e+06	74436.3	83754.4	198169	129893	91007.5	49275.6	115356	49124	275209	81321.7	128030	70182.1	47882.7	115983	56759.7	70308.3	1.13329e+06	157462	68822.1	66873.8	83101	60973.4
neg-4.003_494.15843	196075	272315	163019	257680	177967	232268	138311	175074	201285	218217	190802	297866	154058	253887	146214	153030	128421	167448	423770	187851	207851	263372	252273	180593	192020	185465	175423	200215	256930	145994	317312	215762	122707	107694	177004	139798	210657	209996	225041	359234	274974	141677	379160	210782	158610	240745	224078	197017	200687
neg-4.003_580.31075	3.85143e+06	2.05669e+06	3.04074e+06	688947	5.01199e+07	9.05736e+06	1.69891e+06	1.13949e+06	3.15554e+07	2.65e+06	1.58387e+07	1.21548e+06	9.44201e+06	7.0972e+06	2.16535e+06	9.68274e+06	5.38723e+06	1.93264e+06	8.66436e+06	5.69696e+06	4.95401e+07	1.96544e+06	1.96425e+06	1.41463e+07	1.10162e+06	1.81609e+06	3.47283e+06	2.71389e+06	2.50894e+06	1.32191e+07	1.7319e+06	1.88732e+07	1.79168e+06	3.51402e+06	2.40642e+06	192666	193757	1.75266e+07	2.02035e+06	2.63484e+06	1.10767e+06	861481	967532	1.21589e+06	1.58541e+06	1.25641e+06	1.81461e+06	2.23787e+06	768299
neg-4.004_410.17002	174315	217733	300227	151113	338421	276499	100488	113437	415002	646816	93519.5	748548	280288	361359	127016	83826.5	144567	211034	335055	207380	541863	154452	433508	453992	478378	87831.5	274910	278868	116447	1.38069e+06	180595	359448	68509.6	333047	99461	254793	193941	354104	212826	266737	161255	178404	297274	118239	474055	169317	262412	121246	153272
neg-4.007_380.09358	307019	163540	149406	205762	1.0537e+06	685100	100534	321897	186952	288677	165753	237852	435901	180169	90845	133190	2.42691e+06	602020	118047	150003	309960	210308	189309	118267	242695	119595	218697	188523	165514	114369	246336	172290	151691	1.23213e+06	264129	856194	567910	237228	309314	94680.8	219572	153473	897989	1.11073e+06	126653	171194	160172	7.93206e+06	367149
neg-4.013_354.11106	102964	95325.7	2.00842e+06	135314	3.87593e+06	972270	123065	67825.3	488102	89066.7	1.22303e+06	150822	1.6935e+06	81502.8	635828	1.13117e+06	942402	621457	6.90885e+06	2.68931e+06	1.60408e+06	203783	2.21692e+06	161873	100835	271598	3.71865e+06	823548	98456.7	2.4507e+06	295667	1.60542e+06	178508	197170	847375	195082	110621	1.08007e+06	805645	298902	123369	399299	81368.7	1.50039e+06	116654	85681.9	73081.4	86928.4	172618
neg-4.023_352.11984	150476	124752	85432.7	230014	65680	66076.1	57287.4	165990	85623.4	312929	74133.4	114948	246120	66821.5	148420	197917	262683	69022.7	67504.6	228585	795499	169188	196187	297512	1.62185e+06	296856	62964.9	127097	305431	103855	140865	115923	585366	78041.5	60475.4	73468.4	96192	360973	75789	54142.6	108189	98737.6	134483	86773.4	212346	128358	185427	55888.7	67911
neg-4.034_474.20045	510871	480499	374623	603467	5.96201e+06	555805	319029	124984	3.89896e+06	339774	1.3808e+06	805987	1.2987e+06	343575	113582	1.00604e+06	172470	417256	2.23706e+06	346708	297579	172582	250737	502790	195548	1.28201e+06	2.67339e+06	175353	2.58404e+06	533939	489612	472629	111817	303277	150834	229534	1.06399e+06	222599	190110	263926	566032	444187	555667	169310	5.51464e+06	448822	209064	117887	220499
neg-4.04_382.07295	84136.8	116514	80179.8	136827	168028	5.05155e+06	143230	60211	147221	87204.9	2.21806e+07	92088.3	3.6445e+07	57180.3	43887.2	295047	284805	460438	1.59207e+07	125534	77478.2	371791	109175	111485	236851	148005	1.10575e+07	498822	87382.9	330835	124970	78250.6	54595.1	911256	54748	119900	478801	72622.3	190282	62596.2	86838.1	69619.1	322799	60895.2	74937	68540.7	54514.4	61596.9	123183
neg-4.046_350.18478	85754.3	97732.8	124287	2.14009e+07	248965	79425.9	335006	586790	1.17525e+06	4.44311e+06	101991	3.88351e+07	220863	55677.1	219901	228497	276593	571150	64593.6	428540	1.24627e+06	3.37384e+06	111274	244801	455381	223947	75095.6	126934	315699	718316	114518	428510	51909.9	66925.1	55800.5	62643.1	113488	976125	210414	60206.3	3.84206e+06	70957.5	375036	330548	332878	79121.5	2.60719e+06	3.14897e+06	455498
neg-4.058_568.30771	88500	2.87264e+06	134524	591912	2.25507e+08	2.92708e+07	225945	295802	1.81414e+08	499355	2.49956e+07	215252	2.80178e+07	58605.1	255552	3.60026e+07	256181	839185	4.91353e+07	281587	780092	206495	100133	271055	384980	124642	4.11033e+07	71882.8	759485	6.7867e+07	113504	7.18945e+07	180021	668233	99893.7	550160	67032.7	515674	230450	96339.5	330738	548641	1.26783e+06	192995	1.41707e+06	293743	108888	135506	137291
neg-4.059_230.02515	81149.2	75998.4	72092.5	82773.9	80489.4	149779	240325	62986	85744.5	243943	588343	88818.5	226400	53737.4	46597.9	71185.3	684140	127528	80860.4	93259	69200.2	86973.3	1.17201e+06	107527	88325.1	231041	71749.5	65912.3	75621.9	63191.4	435842	75472	49122.3	54777.1	61738.8	58370	119766	57283.7	203026	408137	79073.3	63761.6	63339.2	53901.1	274235	69329.2	49444.9	55631.6	62490.9
neg-4.059_423.10774	78036.7	402060	69327.3	155925	433849	153869	387159	549798	1.20273e+06	177816	68869.7	438239	42376.2	51676.2	81121.9	105746	412994	91755.8	77758.9	243127	637711	140079	84296.6	149672	108618	1.0062e+06	83613	440640	80802.7	84451.2	100084	804189	133660	203825	141664	56131.2	1.49171e+06	115439	92580.2	84949.4	351217	198831	1.11197e+06	424905	627003	304728	97377.2	541730	60094
neg-4.064_223.12105	81580.9	455188	227441	980646	73833.5	65758.1	59881.8	361944	2.84923e+06	3.03683e+06	184166	1.0378e+06	158339	87639.9	98407.5	254860	595088	829115	74173.7	117733	5.65457e+06	1.0254e+06	463843	348870	1.49905e+06	1.11194e+06	534567	60461.7	96192.9	1.13406e+07	88706.6	179819	72528.7	129674	98579.5	238374	123886	111905	159481	116350	1.71556e+06	521293	151154	1.16529e+06	5.23877e+06	219881	246198	74347	250662
neg-4.065_179.13108	65276	90975.7	58829.1	85653.7	75608.2	64878.4	50109.4	45860.8	296029	251255	67273.5	83416.6	41394	53162.3	43772	64131.7	51547.8	89629.1	109904	87603.3	252386	103359	82342.8	83354.9	82968.7	99485.4	52178.9	61915.1	71035.9	728488	90838.9	71528.2	46143.3	51455.2	57994.7	54830.2	52831.9	58985.5	65425.4	82980.5	108239	60939.7	50905.3	91751.6	398919	65124.8	48597.4	52257.9	53590
neg-4.065_290.11936	404338	889684	638272	2.77008e+06	824763	1.36147e+06	2.05478e+06	1.79661e+06	910357	2.40337e+06	467406	1.70473e+06	868624	548720	2.64958e+06	4.18107e+06	590163	1.21948e+06	670868	3.14154e+06	6.17987e+06	1.03818e+06	567945	873967	2.99187e+06	838624	420671	847066	988404	2.06192e+06	1.07487e+06	2.39605e+06	716551	4.197e+06	540406	1.08444e+06	828137	556511	445129	615252	2.32377e+06	1.13943e+06	6.3519e+06	1.07769e+06	1.0068e+06	654138	937270	2.67623e+06	3.2955e+06
neg-4.066_365.04213	66829.8	73088.9	60229.5	132762	77408	66422.8	51302.2	46952.5	382126	391847	68874.8	85402.2	54121	54427.8	44814	60334.6	97397.4	91762.7	112520	89688.7	322353	68754.1	84302.9	85339.1	153942	108152	53421	63388.9	72726.8	1.20897e+06	93001.2	73230.9	47241.7	52680.1	59375.2	56135.4	54089.5	60389.6	66982.8	84955.7	92498.5	62390.3	52117	186474	548194	66675	49754.2	53501.9	54865.6
neg-4.07_580.23832	189218	519517	505263	2.64034e+06	171443	925878	1.63324e+06	1.37261e+06	1.01042e+06	2.82635e+06	311864	285613	189734	368334	2.32131e+06	2.99262e+06	279525	1.21371e+06	203593	3.98744e+06	3.78554e+06	734364	152538	661483	2.40458e+06	408055	279343	327463	649733	809828	1.36207e+06	1.38465e+07	171150	3.90985e+06	266188	570803	530469	1.27973e+06	294102	392669	802808	386633	2.14778e+06	814131	1.16765e+06	404767	517234	1.57125e+06	3.49205e+06
neg-4.077_415.10977	572533	940087	221442	360711	784306	885324	366589	268651	258067	468062	305436	329891	6.62893e+06	263911	339970	3.43125e+06	395259	1.00861e+06	4.79545e+08	850778	1.57485e+06	1.08363e+06	297530	519868	406408	341087	593697	411246	228203	549210	413483	347585	368188	494975	210676	307121	191182	445191	299757	434856	287649	247538	202048	491450	303150	248159	263245	162890	196944
neg-4.083_322.05152	3.02887e+07	196335	121118	200208	2.44264e+06	71002.3	1.96723e+06	77028.3	152630	568761	805672	93158.8	4.14163e+06	5.91735e+06	59975.1	164586	5.32039e+07	2.86114e+06	388568	2.48344e+06	297532	343265	196052	62306.6	378612	128816	144778	75374.8	67449.5	144288	708606	1.06082e+06	4.14798e+06	1.68941e+06	61763.5	386652	84105	1.24346e+06	192032	133100	98065.3	114238	62714.3	47220.2	52831.1	246834	65097.7	174957	329818
neg-4.09_554.08602	170993	92570.2	74898.3	124471	70215.7	79697.7	90144.2	234079	85898.6	430507	79305.9	120621	91590	95337	71742.1	82357.6	77951.5	125484	146907	110406	475136	962267	103656	80288.6	116977	70645.1	83607.2	88427.1	88455.8	96724.6	135602	738591	71108.7	158330	72121.9	64092.7	89955	88525.6	121962	76576.5	116238	82288.3	1.97372e+06	66818.1	190962	90045.2	88257.4	72352.4	66024.8
neg-4.091_662.22263	148878	80598	71304.6	108373	645653	64551.1	78485.7	88765	74789.2	99374.7	69049.2	94713.6	79744.5	83006.9	100855	71706.2	67869.9	109255	140665	643814	302498	81357.9	90249.9	69904.8	1.41653e+06	61508.5	104820	76990.7	77015.7	84215.1	170276	99491.9	58213.8	150233	62794.3	55803.5	245138	2.13006e+07	106189	66672.8	101205	225612	71503.8	4.57294e+07	128053	75127.7	76843	62995	72972.1
neg-4.098_489.05976	176212	110205	87287.5	155160	72358.8	82130.2	2.07606e+06	123716	91387.3	117620	74606.2	124303	94385.5	105953	73931.8	85157.4	82567.2	129314	147145	3.80649e+07	1.83616e+06	3.80846e+06	403469	3.90251e+06	120547	82842.2	86538.8	688123	163277	118326	2.14552e+08	117758	73279.1	92683.6	91467	66049	103117	343413	125685	79524.7	143144	97490.9	91833.1	87853.8	85138.8	1.56885e+07	101647	120701	84784.8
neg-4.105_379.19972	208910	177522	467483	711207	483302	663514	139559	322821	358863	1.30074e+06	110969	1.58209e+06	247563	322555	87650.7	111682	257254	3.54139e+06	214868	695936	586122	880518	226259	268880	876782	665429	603945	406523	273311	7.98815e+06	179497	586819	118653	268947	263419	496491	351212	149611	219130	457252	1.25673e+06	153137	313860	243489	158192	190723	265132	128039	519692
neg-4.107_206.058	134126	126856	271252	118102	667426	4.40174e+06	88360.7	733368	7.29927e+06	161165	1.36367e+06	115241	987443	80648.2	250545	3.92819e+06	412754	141335	5.34104e+06	13196679	1.72199e+06	135335	345208	103322	98091	117114	6.8697e+06	194695	124281	6.81998e+06	189221	464800	81902.7	235848	115451	182426	80584.2	597705	136055	95897.1	108956	98318.7	69900.3	1.72146e+07	93378	70631.3	89408	60445.5	64535.3
neg-4.122_440.15423	438961	317966	243771	386519	304801	3.3691e+06	293240	308190	1.49139e+07	293003	8.58066e+06	416216	4.55866e+06	263941	205094	1.8476e+07	1.39341e+06	322135	6.19272e+06	341489	891904	298839	299509	338145	361713	232128	1.98593e+07	311845	574280	4.35389e+06	496694	3.14457e+07	227317	230884	248424	207393	263731	297027	1.19629e+06	318171	356585	341717	236107	229671	335771	312976	292610	228598	211208
neg-4.123_327.00712	195591	166091	127335	179012	116624	283768	1.36709e+06	121183	113619	110203	234433	217412	107177	137672	107132	99177.3	112397	148714	127952	4.32826e+07	3.40793e+07	1.57823e+07	1.35463e+06	2.47276e+06	173542	121253	154442	1.88397e+07	299977	182815	1.83831e+07	127950	115688	117136	129765	108333	138367	130217	149783	111380	181433	178497	123331	119969	165332	2.04733e+07	152846	123832	88347.6
neg-4.124_247.04055	215824	183272	140507	197530	130517	313122	1.7477e+06	133719	125372	121603	258684	258240	118264	151913	118214	109437	391876	164098	141188	4.19269e+07	3.77238e+07	1.5589e+07	333410	1.9574e+06	191495	133796	170418	1.53601e+07	331008	201727	1.54629e+07	141102	157849	129254	143189	122636	152012	140855	165277	122901	445628	196961	136089	132379	192047	5.69553e+06	168657	154898	97486.8
neg-4.124_283.01702	103187	87623.6	67177.3	94440.3	62401.1	149706	1.63519e+06	63932	59941.1	58139.2	123678	132469	56543	72630.8	56518.8	52322.4	157024	78456.5	67503	4.04313e+07	3.63659e+07	1.50186e+07	245950	1.78845e+06	91554.8	63968.6	81478.2	1.47705e+07	158257	96446.8	1.49021e+07	65797.1	92947.7	61797	68459.5	60153.7	72677.8	67343.6	79020.1	58759.9	297866	94168.6	65065.1	63291.5	87223.1	5.49278e+06	80635.9	85416.1	46609.1
neg-4.124_712.38935	3.98488e+06	309499	7.61929e+06	312749	2.85997e+06	991540	3.63228e+06	257901	280523	237081	5.14842e+06	904706	269089	702981	1.70467e+06	994250	436261	2.44825e+06	3.31302e+06	3.24869e+06	658531	506867	1.03148e+07	4.17957e+06	1.59143e+06	701640	2.16879e+06	4.7641e+06	2.09059e+07	283187	1.21052e+06	237361	403681	9.72888e+06	4.73883e+06	6.84428e+06	213397	244075	5.24553e+06	2.22111e+06	500069	718780	1.52822e+06	1.03229e+06	269598	1.96213e+06	3.5633e+06	832746	290890
neg-4.139_474.19307	1.51867e+06	5.60905e+06	144171	590871	6.02426e+07	8.06512e+06	2.52461e+06	712317	5.57109e+07	490641	1.043e+07	460545	7.67094e+06	642547	199143	1.71047e+07	733757	1.46295e+06	1.13996e+07	293065	184460	357054	263308	185325	677505	1.0641e+06	1.36909e+07	376273	1.12848e+07	1.13712e+07	403540	1.02963e+07	413536	1.38017e+06	162208	5.48453e+06	2.57908e+06	269079	852536	650295	783987	208439	1.02018e+06	135812	659909	556132	1.20098e+06	814088	449481
neg-4.147_354.11104	138196	114232	81139.4	98666.6	2.30945e+06	1.68761e+06	94860.6	79589.3	932791	75544.2	1.2442e+06	130971	1.3674e+06	101558	63749.2	1.8288e+06	93296.3	264579	2.49922e+06	1.75054e+06	4.45242e+06	1.82027e+06	121638	86368.3	160497	72765.3	2.57001e+06	105060	127037	1.58196e+06	174376	3.28913e+06	79982.3	78634.7	300562	85432.4	90658.6	3.92739e+06	84636.9	73924.5	115303	107288	89017	1.29073e+06	147840	99482.9	71611.2	78021.6	62991.1
neg-4.147_368.09025	126611	104656	74337.6	81110.1	290349	1.86829e+06	60593.3	74754.3	322036	106210	219393	89085.3	853833	89659.6	58405.2	1.18846e+06	65958.9	206400	2.2361e+06	1.3346e+06	3.08173e+06	236258	111442	79128.2	147043	66665.5	1.18292e+06	96253.1	116388	1.33895e+06	159758	1.56935e+06	73277.5	73872.8	72849.1	66088.5	725403	612568	77542	67727.5	107350	98294.2	76943	1.04932e+06	135447	91143.5	63594.8	57937.8	57710.6
neg-4.154_365.10203	81079.7	108857	52919.4	88226.2	170601	152677	183858	224329	575997	216339	169040	173173	76311.3	67872.4	99179.7	98036.7	248999	54519.9	72586	97055.4	142324	90867.2	96619.2	217512	93702.8	423080	197856	209721	56997.3	76756.7	110588	150625	96795.4	273238	90224.5	93107.9	542345	58742.2	120801	62640	81544.5	71209.9	365098	536029	412544	166127	49373	182366	44804.8
neg-4.168_540.24013	2.10696e+06	3.29303e+06	6.2401e+06	828553	7.34711e+07	1.23193e+06	8.8676e+06	1.55826e+06	2.09429e+07	1.22243e+06	4.71327e+06	324358	2.20518e+06	1.29607e+07	818138	3.24791e+06	4.93397e+06	2.2341e+06	2.73896e+07	1.1937e+06	627249	820841	3.73598e+06	6.59983e+06	532657	2.4438e+06	1.13804e+07	2.26617e+06	1.81148e+07	7.36042e+06	1.1322e+07	8.25419e+06	416954	7.85201e+06	1.42744e+06	7.5017e+06	3.6832e+06	1.08773e+06	807529	3.19282e+06	1.20878e+06	3.29112e+06	1.84495e+06	3.12836e+06	4.53393e+06	4.56098e+06	2.58678e+06	1.59533e+06	562907
neg-4.169_206.05813	153053	157887	143504	142563	874879	9.98874e+06	104719	101295	2.5278e+06	105805	992640	154616	5.12456e+06	133070	92615.1	5.40002e+06	93954.2	123618	3.49035e+06	5.02272e+06	786571	128134	205736	105851	231450	116231	4.67697e+06	150807	102187	9.12986e+06	217388	1.50083e+06	189256	113619	137508	652730	114674	709639	141286	95655.4	129470	141297	124369	8.22302e+06	165075	150551	116615	96705.5	98854.4
neg-4.175_620.2648	149511	154234	192985	198456	184368	128726	102296	100079	210210	262493	260439	174344	151431	286140	90472.1	145805	94967.5	130169	144038	172295	255452	170001	302367	105588	479575	337231	190292	175245	227826	2.61477e+06	219449	189292	123217	110990	376313	104698	131794	788515	119422	233352	406493	308563	132542	464804	149332	917231	118561	186576	171847
neg-4.176_310.13252	415704	88694.6	48892.6	198274	399846	125856	239987	180644	139952	106144	239010	83646.5	93389.4	74669.8	93292.3	892883	262383	89636.9	709808	110496	189655	61872.5	350789	87161.7	101397	72124	142416	175662	452987	2.51816e+06	695211	489855	330493	176719	174497	130046	125112	426162	54546	153778	103477	478363	411176	157603	233835	226519	282543	152878	231335
neg-4.179_276.14786	120904	322317	561421	3.16087e+06	240086	320363	141185	483696	233374	115677	237002	2.44596e+06	131408	192302	167875	191457	83987.5	193702	88121.2	173174	1.08246e+06	4.14658e+06	136072	419427	169541	217812	133359	97276.6	355612	507090	111146	664328	81362.5	161335	69383.4	83101.7	2.42615e+06	358679	372881	77378.3	673057	124273	642592	312583	357835	243343	2.49003e+06	2.48929e+06	629528
neg-4.183_302.11595	66998.1	69114.3	49928.3	47992.9	938521	1.4796e+07	45840.2	40926.5	4.85392e+06	46315.4	4.56562e+06	74553.7	1.11502e+07	58250.9	37481.4	1.93924e+07	134751	50147.8	9.18168e+06	60498.4	152825	58918.9	90059.7	42504.5	68135.7	50879.3	1.38865e+07	66014.9	56261.9	2.35981e+07	126864	7.09768e+06	50017.1	46895.7	39479.1	46916.5	45607.3	56930.1	52616.5	44863.9	56439.1	45788.7	55192	52624.2	55421	65902.8	49278.9	39359.2	41385.7
neg-4.187_564.2767	86766.5	855746	72837.3	62153.6	2.85678e+07	3.51422e+06	59365.7	58079.4	4.466e+07	60218.4	4.67458e+06	96551.4	3.94908e+06	75438.3	53612.5	7.51737e+06	140755	63980.6	7.252e+06	81518.9	81135.3	76303.3	116632	55193.5	88239.7	65891.7	9.62678e+06	139003	221734	9.22796e+06	93455.5	6.88204e+06	64775	62202.5	58803.8	334556	59064.1	73727.8	69304.4	67626.8	80331.1	61385.4	74842.2	63110.4	71773.4	79324.3	922641	53333	54217.3
neg-4.205_308.08024	819581	1.1514e+06	1.68293e+06	1.80556e+06	2.26312e+06	4.23547e+06	2.05078e+06	5.17135e+06	1.40103e+07	3.32778e+06	361242	5.60071e+06	2.52299e+06	550852	3.04305e+06	3.18861e+06	2.1035e+06	184217	209082	2.57057e+06	3.78632e+06	3.31905e+06	1.48776e+06	4.31707e+06	2.65282e+06	7.88403e+06	2.54037e+06	1.62387e+06	2.52292e+06	2.36311e+06	173048	5.12402e+06	1.64648e+06	3.07315e+06	1.82716e+06	1.26605e+06	6.40973e+06	3.80705e+06	1.03185e+06	1.51023e+06	3.69644e+06	3.22148e+06	1.30994e+07	9.00166e+06	1.29505e+07	2.42664e+06	463195	4.33494e+06	1.54148e+06
neg-4.208_371.076	74896.3	105519	123402	229168	223366	507805	75963.9	768750	2.28617e+06	296186	62520.4	639600	180255	67054	330467	223808	354393	83386.4	92895.2	132526	533874	154628	209508	717111	220159	1.52258e+06	271120	334602	144402	217890	104415	676360	66562.1	648401	266537	55486.6	939914	309597	125578	254659	578461	564931	2.02186e+06	1.09149e+06	2.68557e+06	109864	146239	610675	70475.2
neg-4.209_222.08949	64755.8	82406.7	111637	160469	892330	2.61425e+07	159590	47258	1.49709e+06	60283.3	1.99491e+06	75959.5	6.53166e+06	68797.3	78419.2	9.11371e+06	309889	58160.5	3.15517e+06	67073.6	187086	239167	145310	54388	82021.8	59801.8	2.3409e+06	66739.9	92941.8	3.0876e+06	91620	1.45089e+06	51845.1	132243	46203.3	188258	79277.2	95705	60488.9	85667.4	70795.4	82350.3	75609.1	8.02198e+06	59330.8	151937	147615	80863	119271
neg-4.217_405.13304	107107	113309	144745	250203	281624	224972	341394	415064	672036	69429	52891.2	1.02177e+06	57724.2	61132.3	237999	281348	353729	59011	78587.8	139937	487853	60556.3	187182	773837	194508	1.02819e+06	130145	321142	91283.2	67477.5	89522.4	600501	191554	795808	249948	165028	1.64695e+06	121781	105124	115589	554733	283714	1.28856e+06	1.07099e+06	1.36972e+06	124775	51200.6	753258	45027.5
neg-4.235_882.4995	161372	76595.2	70562.8	49616.7	152613	1.42574e+07	43280.7	41500.3	104685	54238.5	53074.4	75369.5	5.39319e+06	64460.7	57665.8	8.96505e+06	57891.8	60328.8	146041	4.26605e+06	64513.2	944359	100517	62871.3	63878.5	78561.6	81803.5	73396.8	55224.4	6.63192e+06	396817	2.13143e+06	184620	49303.1	56018.9	60804.5	42336.9	884462	70933.8	62953.7	1.68511e+06	61506.4	63312.5	7.67855e+06	52909.1	70829.9	310742	183510	42355.3
neg-4.239_271.12139	277178	176032	113750	965566	146429	204287	103542	189997	2.41215e+06	1.54177e+07	50923.8	161807	144366	198244	89685.4	59328.6	906986	798528	140124	68183.5	1.30416e+06	240928	597398	448866	403891	1.33646e+06	432816	70422.6	132771	1.27325e+07	534195	208116	246896	89374.4	53749	484201	53946.5	101131	68059.4	60402.8	996192	390122	60747	950532	835330	185301	119883	47161.4	353969
neg-4.239_415.03675	156274	74175.5	69416.6	62772.7	147792	68289.4	40543.4	40189.3	495206	1.98203e+06	51397.7	69525.4	106548	59794.8	58643.9	59880.7	150814	141881	141428	68818	110915	57831.2	115849	60885.1	61860.5	280679	79219.2	71078.1	53479.8	1.98995e+06	539166	55348.8	249194	46432.2	54249.2	58883.6	40999.4	51973.1	68692.9	60964.9	60225.3	59563.3	61312.4	164579	163582	68592.3	46002.2	47600.3	47039.1
neg-4.24_469.02723	202001	95880.2	89728.9	63087.1	191038	166942	362117	51949.2	131042	67894.6	66437.4	94345.9	88461.9	88275	75803.9	80884.4	72467.7	75518.3	182812	129161	84108.9	74753.4	125825	832810	79961.8	98341.7	102400	4.93156e+07	160760	69399.9	2.5181e+06	71544.7	322111	61716.5	138895	138256	52996.4	71906.7	103863	128833	77848.1	76992.4	79253.2	62217.9	95001.7	1.81052e+07	59463.1	61528.8	53019.4
neg-4.26_312.1006	160580	67775	87504	53728.9	104286	1.99033e+06	49029.9	141873	72688.7	45888.4	80801.6	66272.3	220070	122537	79701.3	422593	66076.8	112306	132152	9.47279e+07	241194	7.17865e+06	126445	119166	60541.3	46073	220035	179904	228074	1.39569e+06	632289	65573.8	249662	56042.1	167491	153889	43905.9	83265.1	163286	180786	54978.1	55661.1	164959	340813	94959.6	68051	150741	55686.8	35902.4
neg-4.261_234.07959	297298	100932	99125.6	155971	118136	373094	179961	99938.6	82342.7	77878.9	78269.3	236951	94805.6	138812	356510	96916.4	164947	127222	149704	72711.9	137007	60158.6	401667	287780	175591	177101	249259	203798	258365	62926	716265	88446.7	282820	110820	373195	183708	1.75437e+06	94323.8	184972	214036	249909	63053.6	1.00263e+06	60594.2	309233	77089.1	46825.1	157244	63726.2
neg-4.265_381.05232	295403	76287	101413	58701.7	125832	370716	48951.7	48549.6	539179	1.2254e+06	195735	74595.6	98168.6	188742	89101.5	96298.7	74375.6	126411	148750	72248.4	135834	59775.2	399107	141507	68144.8	404512	247670	202499	256718	1.98119e+06	711700	73809.4	281018	58981.1	188526	182537	61103.6	93722.7	183793	212671	61883	62651.7	105331	126789	173658	76597.8	54656.9	62900.9	48102.2
neg-4.266_278.06927	283133	119720	139536	240180	179025	612326	618533	313739	405853	325027	187605	382691	134456	217420	622709	191584	382045	121160	142571	143370	265987	74356.2	382530	749938	132165	566690	643908	355649	872413	131115	682138	343319	269345	504779	1.10542e+06	384794	4.07123e+06	89829.7	476204	412822	757641	73078.5	1.90596e+06	132875	1.01158e+06	78309.9	117722	536411	70464.2
neg-4.266_322.05916	288074	373057	614342	500026	391171	1.04966e+06	1.20442e+06	682760	959042	635117	190880	919359	227649	184060	1.44547e+06	439020	931030	123275	145059	469418	523738	149753	389206	1.29474e+06	446265	1.37645e+06	712329	1.04285e+06	963137	361535	694044	738462	274046	1.1102e+06	2.01716e+06	1.17799e+06	8.96764e+06	139043	943324	777623	1.65272e+06	216653	4.66641e+06	387756	1.62385e+06	296040	240077	1.0694e+06	305642
neg-4.275_392.14785	1.08114e+06	240931	378767	576446	2.91276e+06	1.21535e+06	183222	921084	460153	5.46669e+06	926219	2.37175e+06	504539	462083	737454	5.60735e+06	3.92173e+06	775916	7.29955e+06	193919	1.24998e+07	6.76427e+06	1.70038e+06	4.32764e+06	989940	236778	433478	323228	1.14859e+06	633974	1.52874e+06	5.34515e+06	497567	1.13987e+06	427522	2.46327e+06	494574	2.12639e+06	833022	449253	337670	757024	3.06545e+07	344017	7.89238e+06	150089	387572	281099	3.07771e+06
neg-4.286_830.46869	311213	104757	105272	69442.4	358528	1.38178e+06	56864.3	64042.7	298972	59108.3	3.69347e+06	81122	2.62001e+07	350767	85738.5	5.6421e+06	75244.2	114904	743473	97291.9	83042.1	73073.2	940839	104009	79472.6	66177.7	164324	131458	184823	620755	730302	83806.7	242464	62268.4	127483	126008	52121.5	83039	156777	144994	68836.4	69969.2	115044	9.3741e+06	69375.7	93048.8	63220.4	65294.8	55400.1
neg-4.29_380.19551	2.7504e+06	2.76537e+06	1.71957e+06	2.99157e+06	2.08295e+06	2.00057e+06	1.49757e+06	1.74221e+06	1.63519e+06	3.21831e+06	1.66397e+06	5.97926e+06	8.05393e+06	473878	2.45473e+06	2.411e+06	2.23886e+06	2.24125e+07	1.06162e+06	1.97175e+06	6.98047e+06	1.55956e+06	1.26494e+06	1.65225e+06	2.80678e+06	1.63126e+06	4.0761e+06	1.14075e+06	715181	1.06655e+07	981878	2.52505e+06	720428	1.88519e+06	1.16806e+06	1.28476e+06	1.9503e+06	1.73886e+06	4.21952e+06	1.66422e+06	2.08787e+06	1.49785e+06	3.32922e+06	1.19535e+06	870903	1.16527e+06	2.42231e+06	1.10089e+06	3.13338e+06
neg-4.293_338.11602	574771	267313	933425	120162	2.66082e+06	1.70903e+06	722718	111822	743256	107455	767291	139478	1.49672e+06	609897	421435	2.53561e+06	685992	172741	3.33135e+06	1.14919e+06	1.58417e+06	300340	1.54831e+06	146313	140782	236297	4.91237e+06	531556	182490	2.1228e+06	1.2227e+06	801192	275549	1.43331e+06	178692	536688	273280	3.36342e+06	630308	158537	147499	1.01662e+06	630731	2.8564e+06	1.21926e+06	196884	198443	100114	97343.9
neg-4.299_334.1899	507788	2.37236e+06	1.0888e+06	1.73168e+06	5.90211e+06	415429	504735	408933	2.11527e+06	7.65155e+06	861189	1.80245e+06	8.16285e+06	853666	4.70161e+06	619282	744145	2.26225e+07	464769	857892	7.22291e+06	2.71679e+06	2.3503e+06	2.77692e+06	431208	423310	3.69402e+06	3.07732e+06	308931	1.09192e+07	1.71139e+06	3.20607e+06	1.04535e+06	6.49268e+06	2.75516e+06	2.38087e+06	1.93054e+06	668544	372847	945284	2.67434e+06	476676	567712	2.78815e+06	1.11615e+06	1.69118e+06	2.30507e+06	2.18961e+06	4.35842e+06
neg-4.309_380.19523	412856	1.54788e+06	324122	1.14031e+06	709055	1.63588e+06	154493	218735	1.87914e+06	1.60456e+06	541682	539297	8.05393e+06	474527	1.27248e+06	1.10727e+06	672176	2.24125e+07	1.69939e+06	1.02714e+06	6.98047e+06	988529	1.15258e+06	483019	237142	268101	3.73334e+06	2.0496e+06	204582	1.06655e+07	767770	111233	304563	1.28289e+06	451739	647107	2.06556e+06	1.47152e+06	303840	744954	413127	374813	300984	1.31051e+06	676877	1.70926e+06	1.2325e+06	3.27311e+06	3.13338e+06
neg-4.313_370.10593	562118	330473	350326	379789	2.94418e+06	5.46786e+06	234595	342474	475763	243988	1.00296e+06	339506	962230	1.12063e+06	234461	2.1028e+06	254893	246194	2.50048e+06	1.18944e+07	1.45651e+07	2.76194e+06	2.72191e+06	324165	319587	424538	2.16274e+06	393586	333029	2.58742e+06	1.81314e+06	2.52682e+06	718869	218987	308132	345006	307005	1.0208e+07	257639	238980	285407	309382	323784	6.95969e+06	367171	374996	277071	291141	275117
neg-4.317_324.99134	130823	100028	106038	114955	86999.6	133198	436114	103661	65239.7	73499.6	83076.3	102762	80432.1	290688	69024.7	88463.8	77151.4	74518.5	80124	1.40985e+07	7.56892e+06	1.09597e+06	564593	2.32765e+06	96733.4	100566	117516	1.72339e+07	100802	105311	1.13334e+07	79509.8	217589	66283.3	81575.8	104427	92924.8	101985	77982.8	72334.9	86387.6	90303	98003.6	87271.8	111136	1.53572e+07	83864.4	88123.1	83273
neg-4.317_338.13722	174415	153376	296761	153260	131395	8.41136e+06	200742	138202	86978.3	98458.9	141337	137004	5.09471e+06	387549	96833.9	4.71687e+06	102859	99349	110337	156900	102383	111948	752722	130813	128966	134076	156674	158828	137664	5.01551e+06	623572	106003	290092	88369.7	219263	180943	123888	135967	190107	96437.8	115173	128666	239796	3.72659e+06	148168	151326	137694	117487	111021
neg-4.318_552.27652	421476	2.06054e+06	938130	4.4001e+06	1.74059e+06	2.39886e+06	1.83219e+06	2.23593e+06	432469	1.12113e+06	1.35486e+06	1.59866e+07	2.47695e+06	377942	883035	1.82816e+06	1.66298e+06	2.42791e+06	985891	370202	1.40754e+06	606700	734062	679312	4.41896e+06	607793	1.88837e+06	1.17664e+06	263995	783790	608113	1.7662e+06	899272	888513	135109	722800	6.59518e+06	1.13158e+06	1.17014e+06	1.2769e+06	4.74427e+06	2.3128e+06	276538	1.10681e+06	4.97487e+06	505218	3.12313e+06	3.2409e+06	4.85568e+06
neg-4.325_500.16927	160195	99078.3	110292	119567	149542	130576	59201.1	107820	67857.1	76813.8	76226.9	106885	134265	198355	175706	114897	80246.8	88503.2	1.00959e+07	9.83678e+06	79875.3	87337.6	584898	138399	95294.7	158558	122231	123911	104846	122206	420490	82699.7	226318	148823	84848.7	151101	105991	3.92897e+06	81111.5	75237	89853.5	100380	263433	6.57772e+07	115595	104208	87229.1	91658.6	86614
neg-4.326_410.14054	254797	504576	271041	223892	554092	368302	155216	400756	3.82279e+06	143835	679501	200144	579620	566157	141461	195866	307721	165724	161188	229209	517151	364598	1.10024e+06	265246	506105	296903	1.71687e+06	3.53705e+06	207581	263227	910954	162730	1.84765e+06	129096	246442	1.54377e+06	311038	198630	831283	140883	457288	187964	328078	193604	216454	436827	274958	271979	9.27542e+06
neg-4.331_524.26397	132828	440929	775037	358063	344536	311996	76197.8	1.0711e+06	107534	686298	79701.9	552230	314174	167654	124073	655671	245356	315605	183134	1.20253e+06	432903	901890	614357	535576	309591	843893	628470	809558	395151	607287	439659	538336	1.31534e+06	375371	186339	113569	719586	160535	438173	253849	703328	184720	679121	780817	3.47816e+06	2.55758e+06	719282	2.95686e+06	463000
neg-4.334_464.31465	9.43242e+07	7.26185e+06	7.32337e+07	1.82876e+07	7.7349e+07	4.06798e+07	4.77619e+06	7.89369e+06	9.13543e+06	2.41343e+07	3.93389e+07	1.64982e+07	1.64168e+07	2.1525e+08	3.84263e+07	3.33283e+07	5.17559e+07	2.72314e+07	2.54515e+08	3.17768e+06	1.21334e+06	8.92656e+06	6388614341	2.97839e+07	1.08522e+07	1254794970	4.86476e+07	593445566	1.38005e+07	3.1226e+06	4339505641	1.64289e+06	9.25763e+07	8.97533e+07	1.72466e+08	8.48981e+07	2.95069e+06	7.65046e+06	7.71655e+06	1.49334e+07	1.28244e+07	5.90668e+07	8.65446e+06	6.61928e+06	2.24354e+08	4.91306e+08	6.09917e+06	1.11214e+08	9.27167e+06
neg-4.344_330.07448	7.56996e+06	2.69106e+06	355892	204638	772492	6.52076e+06	1.30614e+06	714816	483620	6.55992e+06	499178	866439	2.60018e+06	212348	1.07685e+06	1.98723e+06	1.27035e+06	470465	162996	174921	123004	479129	1.16544e+06	174541	396734	348723	421912	262494	173207	278850	834033	1.11059e+06	490112	1.05011e+06	483392	7.52925e+06	1.50785e+06	498223	1.89835e+06	400586	3.05104e+06	1.61605e+06	203613	4.65642e+06	177796	972014	717610	543733	157412
neg-4.357_526.38747	657188	1.12897e+06	617793	1.18795e+06	912839	1.31991e+07	1.08299e+06	645874	1.00454e+06	503445	1.20117e+06	510318	4.64374e+06	477805	712175	3.27199e+06	391904	608203	521052	635089	873965	1.10649e+06	2.85529e+06	444697	1.40446e+06	737478	479670	643104	1.07753e+06	1.31711e+07	2.04336e+06	991070	986611	866766	515303	466608	515060	849442	369120	474576	381545	562444	744412	5.13166e+06	496908	618523	485820	600142	403161
neg-4.359_449.31451	6.58449e+06	4.4367e+06	1.15267e+07	2.7136e+06	8.66851e+06	1.75806e+07	5.90908e+06	2.57592e+06	3.2093e+06	3.06863e+06	1.62742e+07	2.16228e+06	4.12011e+06	3.99941e+07	2.76628e+06	4.08441e+06	9.91369e+06	7.41384e+06	1.03132e+07	1.65199e+06	4.16077e+06	2.15673e+06	5.02855e+08	4.72754e+06	2.18629e+06	2.55138e+08	1.49297e+06	3.70911e+08	5.99994e+06	1.74256e+06	1.54066e+08	1.20108e+06	1.47599e+07	2.00468e+07	3.53386e+07	3.48445e+06	8.22548e+06	3.40441e+06	1.15329e+07	2.1153e+06	696970	7.24057e+06	3.77555e+06	9.60077e+06	2.04162e+07	8.37985e+07	1.41461e+06	8.62636e+06	4.03125e+07
neg-4.363_302.11598	89746.8	129259	64248	53280.4	2.1218e+06	1.00028e+07	51941.2	46711.1	8.60885e+06	50056.1	56350.8	77150.2	8.70268e+06	58901.2	43014.9	1.96319e+07	92312.2	67208.9	4.90275e+06	78813.3	170227	61839.7	370639	66016.7	69360.4	85050.1	4.7988e+06	97903.3	61520.9	4.43202e+06	328292	4.47535e+06	65523.8	57325	55997.6	68961.8	61914.1	62624.4	66379	52068.2	68656.7	65182.6	66243.4	64638.1	64908.8	111567	56984.1	46062.1	46220.4
neg-4.364_490.22078	2.60131e+07	875494	535094	191601	239282	908052	167072	820186	121922	201718	187494	318349	169689	303063	304075	489626	119032	166233	133114	150695	523530	424509	708682	279980	1.98043e+06	1.48778e+06	3.48681e+06	352718	376258	253575	421835	217808	125285	314561	107071	184591	880750	119741	1.40241e+06	115858	318950	6.85581e+07	215957	185013	352497	2.2562e+07	360987	109377	430616
neg-4.368_574.24904	85108.2	85640	66250	54940.7	92423.2	72506.4	54901	48166.7	65751.7	749284	58106.7	79554.3	49267.9	60736.6	44355.3	84567.5	51701	69303.2	71787.8	81269.2	79911.9	146167	382188	68073.9	71521.8	87700.4	2.16966e+08	85736.8	63438	155839	227493	77123.4	67565.6	53402	53497.5	62550.8	58739.2	89357.1	68447.4	53690.7	78249.5	67213.8	68307.6	66652.3	70740.3	115043	58759.8	3.36443e+06	45725.6
neg-4.37_366.07778	118448	199318	84795	414931	190475	279576	217236	61649.7	84157.3	71712.4	1.62638e+07	105909	9.52358e+06	77738.3	56771.4	108240	345616	986256	8.21768e+06	120979	102281	85663.8	489172	87129.4	91542.4	249739	2.01179e+07	129214	140431	235698	291174	108096	86478.9	154402	73906.1	80060.3	75181.7	208790	139709	68720	178049	86028.6	97438.5	85309.9	90542.2	147247	230181	60793.1	58525.3
neg-4.371_326.08274	103556	106277	80610.2	74635.4	9.65962e+06	2.07068e+06	82464.4	58607.2	227227	68173.4	8.54351e+07	100683	2.16521e+07	73901.8	53969.7	285186	143830	167645	4.27672e+06	115009	256195	81436.2	307519	69683.1	87024.7	106710	2.43549e+08	104321	77188.7	224066	276805	102761	82211	64977.4	65093.5	76109.3	71471.4	292311	95255.2	65328.6	95210.7	81783	92629.8	1.7863e+06	86073.8	109260	71496.5	57792.9	55637
neg-4.375_510.22646	130668	134100	2.81221e+06	104833	236597	798854	247242	89735.5	445170	265823	384291	127042	232756	373039	238316	195946	157959	187646	1.13268e+06	490315	3.5632e+06	103202	529068	1.56053e+06	113301	157447	933584	265897	1.07786e+06	292407	591784	170996	5.49758e+06	199405	338794	186744	831437	296936	182002	173280	207963	1.21492e+06	272626	327209	1.04863e+06	137865	90214.6	1.23121e+06	283646
neg-4.375_568.30731	300098	3.3676e+06	712138	2.59809e+06	3.39789e+08	4.95563e+06	3.26909e+06	5.24357e+06	1.29531e+08	2.41596e+06	8.06988e+07	2.43107e+06	8.57272e+06	1.25342e+06	4.8904e+06	2.47793e+08	1.61296e+07	3.35225e+06	1.97804e+07	4.32201e+06	9.47419e+06	1.18073e+07	854722	1.09786e+07	3.13845e+06	6.22606e+06	1.60219e+07	869649	2.72751e+06	1865017158	824425	5.37184e+08	1.45108e+07	391745	899445	4.01581e+06	1.48877e+06	1402548725	633186	849377	1.18837e+07	2.5859e+06	1.51702e+07	9.50898e+07	1.00944e+07	2.13698e+06	8.06627e+06	5.0494e+07	1.48927e+06
neg-4.377_402.13223	184117	594431	708462	143117	1.29449e+06	674990	148661	268611	437063	222299	121567	181503	139455	132829	227915	839051	124785	152015	1.09971e+06	1.89953e+07	9.13854e+07	2.62251e+06	451183	148505	453410	141262	652003	175796	185309	501522	353254	212827	120369	315888	516081	115293	121722	8.39762e+06	171719	117126	490179	563394	166986	7.83914e+06	790106	196966	210423	103506	101386
neg-4.377_488.35089	209635	638819	153650	163160	3.54102e+07	1.40566e+06	169173	429650	4.46665e+07	139855	3.68672e+06	382114	1.55821e+06	151156	110717	3.68774e+06	838905	172990	6.59071e+06	235936	318845	857944	630864	142952	184207	194479	3.25901e+06	214011	806784	4.80048e+06	498176	7.9211e+06	155346	152588	131075	1.38926e+06	143217	801975	195413	133792	195322	167775	190027	521029	176578	224144	212762	164390	115375
neg-4.382_460.24671	255036	469124	362992	333930	323399	249655	454534	756610	251662	1.03764e+07	85502.6	725643	212716	142909	93212.1	622604	123050	430479	131046	157518	418816	352772	565484	174711	407553	257188	434163	193450	351187	320152	226166	458712	116433	105876	154371	251704	132117	675298	555226	121266	1.84715e+07	253680	570260	325744	437943	4.5669e+06	435310	150156	168989
neg-4.388_370.1454	220965	161304	175182	154101	1.63603e+06	977556	116636	218676	354612	128676	1.87634e+06	656174	3.40294e+06	174998	248970	478939	115277	136746	2.0367e+06	346712	966774	119711	249750	176352	273196	156027	7.66618e+06	222059	140954	316914	277156	274182	120261	105578	153204	204939	104766	437645	134727	146455	236261	130724	156787	620638	150012	249788	224835	125766	90922.4
neg-4.392_412.00567	74559.9	88819.7	54016.1	74661.1	81760.3	69897.8	1.32691e+06	85622.8	87442.9	54133	49966.2	362823	47788.1	60790.2	46511.1	81552.8	58825.8	74748.5	66481	4.98825e+07	7.50654e+07	3.15757e+07	131103	643851	234575	52473.1	70361.6	541622	77614.6	174505	458101	106568	64761.3	49475.3	47024.3	112847	57687.7	134660	74185.7	51190.2	68307.7	71981.5	74130.5	58495.1	67771.1	2.37876e+06	58884.5	232921	48060.6
neg-4.393_648.38899	2.975e+06	106936	65033.6	3.36954e+08	98436.7	84154.7	77323.7	103087	284454	74304.6	60157.7	106780	2.56479e+06	365898	671670	98186.9	70824.4	3.17042e+06	11124913	1.05119e+06	447950	76690.8	157843	1.00967e+07	89982	63175.9	1.53485e+06	147213	93445.5	6.68116e+06	111948	128304	5.31611e+06	1.06305e+06	3.4916e+06	1.06208e+06	69454.2	162127	89317.2	800358	82240.2	86663.4	768014	3.16592e+06	99450.3	98527.7	70895	1.30837e+07	90129
neg-4.403_340.13152	94802.8	101514	110328	96981.7	2.95372e+06	1.98481e+06	66797.7	97860.6	1.3099e+06	70537.4	1.49942e+06	101366	1.76745e+06	169289	123265	1.8737e+06	107389	103978	2.26492e+06	1.42251e+06	2.68217e+06	1.80055e+06	149841	166022	90840.1	59972.9	1.5336e+06	192188	136866	3.15752e+06	130009	1.34344e+06	125408	79222.5	137857	202830	65932.9	5.34445e+06	108695	120128	84203.3	99213.6	87502.9	2.97652e+06	97296.4	93532.4	70910	60874.5	57220.9
neg-4.413_190.09943	123635	80948.5	127494	78871.8	109116	120599	54324.2	70703.9	82608.8	2.21298e+06	73199.6	86893.1	98315.7	137677	100247	95771.3	110963	84562	1.40711e+06	67314.1	5.88844e+06	602126	130985	135020	73877.1	164226	205209	156300	111308	78934.9	145058	2.5211e+06	159016	295532	112114	164955	51850.5	112395	88397.7	97696.2	68479.6	136079	4.7432e+06	52830.7	825795	96138.6	57668.6	69911.2	46535.7
neg-4.414_344.12647	133628	103114	137800	85246.9	736343	3.688e+06	126611	373246	819310	422592	916966	255285	8.90994e+06	148805	188376	8.10161e+06	406505	91397.1	3.33648e+06	72755.1	2.76055e+06	4.75635e+06	141572	291300	79848.5	90556.5	5.0742e+06	186126	300665	7.08574e+06	156783	4.70217e+06	171870	69636.6	121176	258574	56041.6	874459	95542.8	105593	233680	87208.8	192971	5.56986e+07	163412	103909	170493	81430.9	50297.2
neg-4.417_382.07288	248340	152500	222142	137423	190120	690652	94652.6	123192	143935	99951.8	8.61456e+06	151399	1.19134e+07	239883	174666	166869	193339	147338	7.07372e+06	149476	862143	107010	228223	235255	128721	84954.5	7.12118e+06	300047	193939	159807	306307	172590	336122	112259	195344	287411	93427.2	195834	154021	170222	130992	140586	140529	92050.4	137869	167509	100480	121811	81082.2
neg-4.425_288.13646	375864	230810	336213	181317	2.00935e+06	2.68539e+06	139611	170103	1.30638e+06	131909	1.64269e+06	229144	1.77585e+06	363065	334939	4.01381e+06	292619	205606	351940	226233	1.02338e+06	161960	345417	356060	170239	126495	717361	467922	281072	2.8068e+07	463598	2.19662e+07	508724	169904	286447	407876	132765	227073	225700	240969	198257	201536	212691	249900	208667	253526	277794	184362	111584
neg-4.425_308.10552	1.04679e+07	489947	4.71181e+06	145955	3.92309e+07	5.45688e+06	174514	1.50159e+06	7.60095e+06	92267.7	1.13517e+07	622011	1.64197e+07	230951	1.79054e+07	1.29188e+07	553006	299949	2.52052e+07	1.23013e+06	2.62319e+07	4.27638e+06	886251	238888	119474	89712	1.75251e+07	1.09304e+06	188814	1.55023e+07	2.70757e+06	1.17125e+07	869225	2.00556e+07	806209	2.27085e+06	1.87922e+06	1.49279e+07	4.11738e+06	1.36022e+06	141740	7.0911e+06	448142	2.11466e+07	304694	1.20671e+06	686911	1.05041e+06	291404
neg-4.431_354.11084	1.04809e+07	497897	4.70183e+06	118308	4.07185e+07	6.46166e+06	105973	1.48494e+06	8.17879e+06	101576	1.18063e+07	629904	1.73731e+07	254251	2.39128e+06	1.43706e+07	589139	2.7937e+06	2.77326e+07	979940	2.52345e+07	4.86833e+06	896337	262988	131528	100144	1.91235e+07	803839	207863	1.86564e+07	1.69148e+06	1.23767e+07	400396	974964	3.86757e+06	2.24689e+06	1.72513e+06	1.54125e+07	4.12481e+06	1.36774e+06	156040	350983	422551	21329176	144534	1.22009e+06	227493	408138	83310.8
neg-4.431_620.24154	134254	82442.3	100430	53691.1	7.17648e+06	1.57716e+06	291509	40240.1	1.44495e+06	190450	2.18782e+06	65589.7	2.68528e+06	251961	237810	2.38076e+06	85191.3	55713.5	4.35545e+06	1.24656e+06	4.84744e+06	985568	104589	121305	59690.4	45447.5	3.1949e+06	162207	103477	3.34257e+06	165591	1.96749e+06	181709	56857.5	97833.7	1.63419e+06	115473	2.87195e+06	65353.4	76585.1	140150	60808.4	76488.5	4.03478e+06	65593.2	81048.1	52454.1	53981.3	67194.4
neg-4.433_646.22766	154195	94687.9	252045	130979	8.23727e+06	113639	71757.9	46217.2	61169.2	52945	252268	75332.1	76790	132524	102083	111978	97845.2	63989	185706	3.13257e+07	384994	283946	120124	137078	68556.6	52198.1	222004	186300	82992.3	72186.4	190187	61440.5	208699	65302.9	112366	98610	49166	1.1743e+07	73508.5	69750.3	81333.1	67226.6	81445.3	6.39737e+07	128980	93086.6	60245.4	61999.5	45287.1
neg-4.451_396.08853	205564	142914	269567	75166.4	414220	3.63359e+06	91563.7	64048.8	98916.8	71948	137228765	104397	1.04979e+08	121501	78403.5	222194	1.81708e+06	96794.5	9.08544e+07	176471	104414	84570	159598	127107	88819	79705.3	4.96052e+07	145569	158991	119705	247810	85569.4	203875	75080.9	185262	1.18013e+06	129769	119223	111094	132086	92421.8	373527	112240	106576	178935	131353	82822.5	63047.1	62759.9
neg-4.451_574.35444	495024	220163	1.69398e+06	1.09148e+06	4.1266e+06	1.35954e+07	1.00217e+06	1.45646e+06	9.66328e+06	106913	1.45522e+07	150819	2.18585e+07	1.5225e+06	564496	2.08887e+07	363824	1.72071e+06	2.14488e+07	817883	206299	361305	374599	1.1452e+06	128314	526632	2.95949e+07	294339	2.45581e+06	3.72005e+07	1.79224e+06	3.77787e+07	489596	222083	1.50564e+06	1.01256e+06	1.25091e+06	2.95842e+06	279968	429502	191494	1.60564e+06	658534	172765	316224	419016	1.31523e+06	399228	1.50956e+06
neg-4.456_660.24307	135269	111509	210330	58648.6	3.29436e+06	182912	71442.6	52657.9	68677.6	56137.5	412123	69633.1	701620	94801.5	61174.4	99166.3	74536	75523.9	3.21821e+06	1.88883e+07	2.07878e+06	65985.8	124526	99175.2	69301	64192.6	151209	113581	124053	93399.7	186565	66765.6	111697	54993.2	144550	105583	123544	1.86553e+07	86681.5	73348.4	72112.2	75323.2	141913	4.42263e+08	139614	102488	64622.3	84637.7	44713.1
neg-4.46_238.08438	339730	280056	532004	166476	1.00864e+06	815876	179430	132251	184697	184557	539966	193232	1.39375e+06	283059	211454	1.12376e+06	232614	623574	381694	3.45154e+06	3.6969e+08	697947	446612	317386	176443	161221	696155	399255	437619	538657	609282	180652	300258	138116	506379	298314	310283	2.58538e+06	259103	261331	181111	193372	316052	1.72139e+07	405655	257400	1.22287e+06	121246	112298
neg-4.47_388.29437	143872	104631	428640	1.00261e+06	317096	173051	3.38315e+06	566851	1.95785e+06	1.16129e+06	305003	5.45663e+06	129222	171024	198457	187824	298912	1.41916e+06	143784	4.7136e+06	2.70262e+06	185570	1.10017e+06	258154	232465	310399	5.77782e+06	231429	695951	695572	1.2452e+07	2.44264e+06	120221	3.056e+06	653768	163902	770299	764031	7.38548e+06	158190	747184	1.02674e+06	129472	996238	3.0508e+06	299697	102045	700625	2.0762e+06
neg-4.472_324.10055	198354	256967	377173	226654	666232	2.06856e+06	172191	98970.9	119931	223167	157402	196870	174805	220952	170300	305935	163808	138852	285998	4.21083e+06	3.86933e+06	5.38411e+06	239384	223504	139351	116387	587134	281157	308173	178810	429059	210480	224742	97262.1	356594	6.39837e+06	218502	2.98725e+06	182461	294166	120538	136321	242037	6.55906e+06	285664	167426	267272	511388	111473
neg-4.472_370.10567	113332	138558	215503	165646	527950	278265	126800	60168.5	69400.8	204996	125619	77748.6	99877.5	126245	97303.4	192350	93594	79335.2	172470	2.93006e+06	3.78818e+06	5.32391e+06	146857	127703	98540.5	66499.4	200575	160643	176080	102166	245150	149343	128410	57600.2	203746	120029	124845	3.66012e+06	104252	105149	72871.5	77980.3	138292	6.49908e+06	163218	95661.3	207862	462367	79167.9
neg-4.474_280.07377	100188	98796.5	190510	59214.4	342940	163401	56464.6	47040.9	59736.7	2.7545e+06	79503.8	210110	88293.8	111603	86018.3	101011	82739	70133.9	2.49424e+06	275171	3.72021e+06	774861	129824	672284	362680	203251	177313	142012	155658	90316.7	216717	1.23864e+07	121750	59932.2	180115	179416	110365	104895	92161.1	92953.5	57046.7	471189	6.16296e+06	84076.5	1.09188e+06	168637	52410.4	47580	127253
neg-4.48_564.27643	308530	568444	446822	138882	4.26334e+07	3.42973e+06	355097	445047	2.59802e+07	193181	3.81498e+06	356097	1.95391e+06	261754	201748	5.5912e+06	367380	164492	9.90987e+06	299945	195181	156167	304490	388725	130372	153335	7.35515e+06	333076	1.12251e+06	7.88626e+06	871511	4.06271e+06	621424	124113	422443	943551	258851	349686	220191	218013	151091	174298	286732	204978	754872	473571	135245	192050	122484
neg-4.482_192.11499	108045	106544	205449	63858.1	192084	171339	60892.6	49425.8	64421.3	3.42452e+06	133265	196098	97785.1	120355	92763.9	108933	89227.5	70834.7	471983	130193	2.48171e+06	2.02871e+06	140005	154266	127222	107049	169308	104351	156657	283929	233712	2.31329e+06	131297	210664	170049	115618	93795.5	113120	101244	136806	114655	80142.8	8.70379e+06	52372.1	248432	93754.4	67331.6	62071.5	90443.1
neg-4.482_310.0846	204710	254702	389258	225296	665019	9.86669e+06	172998	93645.4	192834	252171	252492	195621	4.08092e+06	228032	175757	8.29327e+06	169056	576965	764606	3.05167e+06	9.17385e+06	5.46069e+06	265263	201091	110033	129530	661013	197710	296812	5.2745e+06	442807	870278	248765	104042	322185	219057	177711	3.7976e+06	191824	317522	127691	151844	249793	2.88879e+07	294817	177633	261387	520348	101467
neg-4.484_442.13041	192265	1.91812e+06	2.48105e+06	6.67749e+06	504909	2.04731e+06	342491	1.92689e+06	412423	4.52676e+07	1.6093e+06	3.72492e+06	1.13127e+06	392756	898775	363289	6.64153e+06	1.25068e+06	9.64615e+07	2.81623e+06	5.26508e+07	4.43878e+07	1.00646e+06	6.04665e+07	3.66917e+06	1.05205e+06	759015	199608	5.40448e+06	1.05086e+07	770416	5.94997e+07	5.02589e+06	9.55688e+06	221634	3.89139e+06	502007	657623	480224	398883	908241	3.89099e+06	1.33154e+08	1.00346e+06	4.84245e+07	1.4859e+06	6.7606e+06	3.0544e+06	2.20407e+06
neg-4.486_610.31831	145617	163957	255704	79478.4	3.03458e+07	726522	71817	61515.8	7.37873e+06	62857.4	515372	95863.4	975617	149795	115455	1.03748e+06	111053	88161.6	1.02926e+06	162039	105720	78425.6	174252	132097	72685.7	87749.7	888305	129876	194976	5.2673e+06	290881	1.04853e+06	163414	71026.7	211644	143899	175904	155254	126010	109301	83880.3	99746.5	164089	65182.8	193666	116688	71317.2	77254.8	90080.6
neg-4.49_399.21681	2.22571e+06	1.67135e+06	2.54483e+06	2.83471e+06	1.94685e+06	3.74086e+06	923315	355699	1.75182e+06	408030	1.14437e+06	504385	700256	2.00183e+06	616382	480215	1.05981e+06	485654	2.09297e+06	480705	1.39086e+06	521026	890573	1.07969e+06	1.63779e+06	509508	1.02538e+06	1.50759e+06	1.73625e+06	1.36753e+06	4.19132e+06	648001	573537	2.07872e+06	2.48584e+06	1.88038e+06	3.86193e+06	580373	829924	535671	364645	973080	1.53069e+06	1.86186e+06	1.45183e+06	2.06078e+06	7.21953e+06	582118	94143.6
neg-4.491_398.21319	1.24113e+07	9.28362e+06	1.54899e+07	1.55409e+07	1.09777e+07	1.83106e+07	4.67265e+06	1.63026e+06	9.43538e+06	2.62971e+06	9.50695e+06	2.8697e+06	4.7337e+06	1.16703e+07	4.24205e+06	2.92638e+06	6.27866e+06	3.06887e+06	1.30726e+07	2.98462e+06	7.95663e+06	4.46646e+06	5.97353e+06	4.88355e+06	7.92334e+06	3.80905e+06	5.20817e+06	8.44599e+06	1.06189e+07	7.06288e+06	2.30594e+07	4.34684e+06	3.91479e+06	1.29321e+07	1.43481e+07	1.05708e+07	2.44658e+07	3.15782e+06	4.88931e+06	2.71475e+06	2.4246e+06	5.74251e+06	8.73751e+06	1.13902e+07	9.5266e+06	1.16083e+07	4.05901e+07	3.43944e+06	607611
neg-4.492_588.29434	328041	298730	576042	615910	639821	494075	236357	367696	1.1439e+06	285662	411799	308365	839876	337453	901142	513057	1.11217e+07	252934	461015	365036	990815	201330	3.2852e+06	341350	915513	860568	669932	1.11246e+06	470662	602836	685546	625456	368134	956656	544613	4.33655e+06	387024	433109	876426	3.3774e+06	603556	394885	4.83606e+06	2.9638e+06	436284	262870	177113	935085	308334
neg-4.503_472.17748	423881	678356	474564	315073	1.44174e+07	403810	199369	347759	4.17071e+06	247722	1.96654e+06	541992	878628	283650	218624	951593	193869	313546	637363	495461	200191	169230	338333	316879	295603	183066	576571	245933	569311	727158	576245	1.17026e+06	309439	321430	400767	476966	225612	266600	238611	230409	158835	334990	314419	256540	272964	262350	446244	146289	126215
neg-4.507_390.96904	167780	150944	214314	75888.6	131071	148087	9.94094e+06	63489.1	81787.4	69014.4	210619	113123	146176	116667	95589.5	140663	94531.7	92210.3	188529	5.64859e+06	872066	102972	1.60592e+07	123910	102043	111391	158875	1.73321e+08	123794	109911	1.40364e+08	94209.1	178498	81836.9	126434	165800	137279	107427	125736	87725.6	89490.2	113985	116389	72658.8	124581	1.51422e+07	86159.3	390150	76798.7
neg-4.522_267.02217	191371	165572	230609	102136	138530	127008	4.53966e+06	229746	95257.8	83905.5	611306	370094	130897	112645	96131	127614	94643.3	96745.6	176044	5.90264e+07	6.86076e+07	2.21883e+07	2.11826e+06	6.91662e+06	575767	135425	171998	1.24372e+08	150504	133626	1.12185e+08	110021	107051	106100	102208	169909	589940	130606	304326	88238.4	130284	141913	116600	82789.4	139382	8.63538e+07	104750	549851	73349.6
neg-4.524_296.14152	2.02516e+06	2.16853e+06	51603.4	4.2795e+06	61542.5	388927	651466	61383.3	438377	569288	250180	2.10016e+06	122764	62580.7	266011	714793	481151	52657.2	128853	2.40823e+06	1.0221e+06	6.02074e+06	136227	110276	634789	157512	251108	80244.7	135965	186306	232020	1.52895e+06	675362	57748.4	634850	221659	234971	396915	74039.8	509432	1.7453e+06	660410	729360	2.37748e+06	133245	80926.5	579413	832857	1.65782e+06
neg-4.527_311.01204	99121.1	100077	672635	228737	67836.8	65369.4	7.46239e+06	52723.6	55973.3	53285.5	389034	210254	49904.6	64005.6	54364	76564.4	51992.1	61568.7	103451	9.9504e+07	1.24677e+08	3.83959e+07	3.15308e+06	9.66707e+06	1.24483e+06	74765.2	84751.5	1.96289e+08	88365.7	80751.4	1.62872e+08	70017.3	61860.8	67521.5	65044.6	79420.4	342820	168369	193672	56090.2	82912.7	90313.3	67729.1	52687	87621.9	1.46797e+08	66662.4	1.26294e+06	46679.5
neg-4.528_289.16826	85424.7	86248.3	51999.3	74602.3	699180	88232.7	174555	152694	237552	138495	252099	69731.2	46864.1	55161.4	186689	608146	52620.9	222694	80092.9	2.99669e+06	81009.1	63167.9	137272	389639	56142	69792.6	66736.6	80860.4	62571.2	388208	233800	68228.2	75264.3	58191.5	1.66271e+06	184685	280031	71632.2	166911	486837	92475.3	255891	140585	45406.7	871906	81547.4	189488	88798.3	400520
neg-4.529_231.04522	240740	254838	284427	157289	174701	155903	4.73963e+06	276773	149802	132267	964377	445939	140661	168817	136231	197173	141958	156775	270066	6.25562e+07	7.32129e+07	2.31153e+07	2.29477e+06	7.23109e+06	633872	175565	217859	130527277	204991	193029	1.15941e+08	173566	163291	171680	158298	242435	840852	206040	725385	139042	287902	223878	174851	159014	218920	9.10621e+07	165250	634584	115714
neg-4.537_341.02246	87837.9	97966.7	3.40744e+06	61032.1	67064.4	50276.7	3.43487e+06	53416.8	56423.7	50033.3	365290	86283.6	46858.8	66106.5	51914.4	61738.3	53185.5	60267.8	97137.1	767654	595204	262460	2.7682e+06	622112	61467.3	60423.9	88035.3	4.63125e+07	68172.2	66605.8	2.60239e+07	65743.9	57903.7	65945	62286.7	74448.9	352522	76358.3	326985	52666.8	77852.3	84801.1	67711.7	66600.2	81692.1	6.14334e+06	58520.1	308734	43830.5
neg-4.545_226.19338	2.76602e+06	172629	463446	120088	2.8053e+06	92243	103380	97689.4	96547.5	94821.6	605049	142916	1.26721e+06	1.34622e+06	964370	103647	131484	174597	1.22534e+06	116400	416483	118023	1.11828e+06	105642	106882	107319	2.21398e+06	2.22286e+06	131414	112856	1.40904e+06	108895	102727	109228	430655	416803	583902	180902	541603	1.86155e+06	128951	140461	114313	151152	163950	156021	98758.5	295177	72598.9
neg-4.55_370.10583	77994.9	97124.8	58069.2	70558	1.69592e+06	438627	60740.9	57397.5	56726.6	55712.5	355497	83970.5	205297	88139.6	53082.4	82112.6	69190.9	58652.1	94533.1	9.75559e+06	216270	3.39243e+06	144291	62070	62798.8	63055.2	100103	83553.8	60524.8	137951	152900	59979.8	60357.2	64177.1	66714.4	106653	343072	9.43039e+06	318219	51147.3	75765.2	72869	65896.5	6.40227e+06	96329.1	91670.4	58025.6	173431	39726.8
neg-4.55_397.23868	257948	495527	2.56123e+06	79944.2	152112	1.47288e+06	3.0535e+06	148654	226209	119861	398835	371250	207944	541746	98803.3	1.75275e+06	77625.8	1.27948e+06	766090	689032	242635	201571	348978	401654	427181	306862	162057	1.30111e+06	1.09613e+07	1.48859e+06	615163	124005	1.01862e+06	202766	712802	3.07737e+06	3.71901e+06	220467	357013	57382.5	329014	290341	2.67887e+06	426757	1.90386e+06	499892	270009	491679	1.94064e+06
neg-4.571_402.07795	114537	136305	145696	109279	3.56093e+06	2.68563e+06	645714	75088.5	371967	68270.7	1.56762e+07	93069	1.55495e+07	157534	70297.5	239754	189594	4.9873e+06	9.71451e+06	855409	320128	69368.3	190343	81201.2	82715.2	79128.1	2.23028e+07	409721	111028	147646	352689	100589	91981.4	81914.7	85128.8	81347.7	349876	3.11269e+06	377883	114644	91620.8	93682.2	93622.6	1.14837e+07	277820	116576	75910.3	174936	55639.3
neg-4.571_648.38872	277675	172841	150000	3.36954e+08	83710.3	63935.9	64012.9	56992.2	110277	54997.2	209768	70493.3	62075.5	126905	85580.5	148603	374645	138665	712737	1.04217e+06	257887	67416.2	163820	1.00967e+07	136321	63743.6	109110	87418.3	68522.8	6.68116e+06	244716	63405.5	5.31611e+06	1.09861e+06	898973	171500	281851	2.39936e+07	304413	70220.2	92253.4	75468	798218	3.16592e+06	223804	121466	100651	1.3418e+07	44821.6
neg-4.572_580.27144	6.65075e+06	1.36718e+06	101977	1.19164e+06	7.25422e+07	5.64233e+06	975179	1.49382e+06	7.46145e+07	859100	1.79676e+07	699182	1.3859e+07	379597	232300	1.42904e+07	639830	886276	3.83924e+07	773792	652949	1.22313e+06	351567	381790	772367	233612	2.02406e+07	247699	1.37523e+07	3.38985e+07	1.78508e+06	3.0062e+06	104698	706415	99343.5	5.8966e+06	398248	844696	559236	270944	3.91828e+06	430741	2.21942e+06	805924	616332	398998	1.58122e+06	2.66461e+06	111274
neg-4.576_331.06318	91851.2	109308	57352.3	87634.9	79726.3	2.53442e+06	60233.7	56734.9	67844.2	50718.7	693433	70992.7	56399.7	126332	56374.2	61524.9	63041.3	54964	104012	68971	2.1483e+07	55555.6	152643	53888.9	66332.5	63455.8	85636.8	88966.5	89037.5	81901.7	282834	63803.5	73763.3	56590.3	68268	61185.4	253960	73865	303038	52404.7	73474.2	59382.5	75079.4	84910.7	222794	93486.6	63058.9	140288	44619.3
neg-4.576_882.4989	9.42653e+06	460686	314876	392785	1.0079e+06	4.92333e+06	298139	239113	869271	230743	7.59228e+06	299203	2.72566e+06	1.38428e+06	2.91642e+06	2.96757e+06	385966	1.28932e+06	1.96476e+06	468604	1.82314e+06	1.28564e+08	643323	274445	292792	267438	2.66237e+06	374955	375254	3.20369e+06	1.19202e+06	297341	368020	276857	5.7888e+06	1.22878e+07	1.07033e+06	429571	1.27717e+06	758003	309662	316629	316427	2.95418e+06	938980	412370	265766	591251	188051
neg-4.588_578.39352	108687	205548	4.8304e+06	103698	170293	755979	258585	147481	74262	60758.8	208389	85264.6	122604	1.1688e+06	180909	1.10835e+06	200917	56266.2	1.90439e+06	81613.2	156540	82852.2	2.6e+06	131439	84825.7	274477	107662	105274	142475	95582.5	7.55466e+06	99306.5	722896	490294	1.05375e+06	2.5034e+06	237903	269406	190881	378899	86941.9	440897	165946	203800	263632	171731	160695	625205	75550.2
neg-4.59_402.20821	5.36758e+06	1.73976e+07	6.37754e+06	5.47588e+06	1.55141e+07	7.36839e+06	6.859e+06	3.42475e+06	8.66176e+06	1.47548e+07	1.09321e+07	5.14813e+06	1.57243e+08	6.85406e+06	1.98828e+06	2.99118e+06	3.04777e+06	1.05945e+06	7.62583e+06	1.7882e+07	3.46058e+06	2.22726e+06	1.98074e+06	6.16652e+06	3.84893e+06	1.05297e+07	5.02843e+06	1.95656e+06	2.68666e+06	6.07348e+07	8.8589e+06	4.85477e+06	998714	977572	6.60427e+06	4.75182e+06	2.00237e+07	5.24668e+06	8.78763e+06	1.96467e+06	8.35456e+06	2.63261e+06	8.24483e+06	5.2114e+06	2.05442e+06	3.36254e+06	8.56656e+06	4.75106e+06	3.25635e+06
neg-4.593_400.21358	3.15053e+06	6.22556e+06	4.79546e+06	2.77452e+06	1.31512e+07	6.36903e+06	2.89374e+06	2.03644e+06	6.12567e+06	1.4257e+07	1.7539e+06	3.73095e+06	1.8199e+08	6.61319e+06	1.33115e+06	8.83252e+06	1.13088e+06	517905	2.70101e+07	1.21073e+07	2.37765e+06	1.75842e+06	1.94091e+06	4.77622e+06	3.94476e+06	8.54242e+06	6.84295e+06	1.63968e+06	1.60348e+06	7.39984e+07	7.11568e+06	4.88689e+06	900651	783169	3.77757e+06	2.03386e+06	2.07093e+07	4.05683e+06	6.60558e+06	1.75358e+06	6.05247e+06	2.251e+06	4.50595e+06	2.72653e+06	1.08571e+06	4.44766e+06	5.71746e+06	2.12083e+06	1.98622e+06
neg-4.601_284.10506	87538.5	90628.8	94875.6	57933.9	323490	4.02811e+06	56718.2	52078.3	1.60265e+06	51068.9	1.95203e+06	69702.5	9.78327e+06	73328.2	41282.2	6.6648e+06	52555.7	55344.5	3.96622e+07	72374.3	100627	63751.4	133961	47651.5	65269.9	73047.6	2.53614e+08	69716.6	109629	1.76606e+07	215310	8.54967e+06	83656.3	44921.5	71993.8	61433.2	105105	79837.8	108592	47409.9	64570.6	58006	60115.1	59355.8	121751	89087	63148.7	47225.2	36688
neg-4.609_530.29189	4.207e+06	1.86037e+07	1.92586e+06	1.49175e+07	2.13987e+06	2.86905e+07	3.21833e+06	5.9539e+06	2.07667e+07	8.00763e+06	5.70916e+06	2.23865e+06	5.07237e+06	6.45904e+06	2.10225e+06	1.04989e+07	767908	1.02371e+06	7.93457e+06	2.12629e+07	3.43891e+06	1.4849e+06	2.12917e+06	1.29492e+07	4.84616e+06	3.89132e+06	3.78406e+06	3.0115e+06	7.39502e+06	2.31139e+07	3.61001e+07	6.05374e+06	1.83662e+07	1.11675e+06	5.68147e+06	221571	1.76893e+07	2.39662e+06	1.26064e+06	2.89185e+06	1.83038e+07	6.12318e+06	2.54964e+06	1.16322e+07	7.56757e+06	5.60571e+06	1.21912e+07	7.92086e+06	1.71386e+06
neg-4.612_284.04828	107433	101130	100545	61587.6	92924.7	1.50473e+07	62942.8	55190.4	78180.7	54120.7	9.65996e+06	74419.2	59886.5	85663.9	54093.9	78943	60984	60157.4	157391	85758.6	6.58367e+06	58836.1	146363	55778.3	69170.4	77412.8	87792.4	74172.9	96980.2	96178.5	181849	70380.8	85712.6	50385.1	74734.5	72591.1	72685.3	85826.4	90055.5	54174.9	68429.2	71857.5	62065.3	54050.1	109237	90711.8	66922.4	61676.9	38880.4
neg-4.623_305.19965	113630	396410	99257.5	60798.9	95237.8	141737	64608.5	2.04957e+06	85133.6	48484.3	121360	73466.1	61676.4	88928.9	113333	154776	348654	62086.6	155375	318297	88910.3	270562	144488	55063.9	59107.8	76421.4	84019.4	73222.9	81053.9	3.99675e+06	143709	63418.1	83556.2	358551	68159.9	214512	73241.7	85362.9	74664.1	53481	591524	834148	195662	51800.2	139389	88662.4	665979	130225	185784
neg-4.623_455.14912	104926	92187.2	80613.7	56141.5	177533	69401.7	81549.9	105340	245581	112141	112064	155986	56951.8	82116.7	56897.3	71962.2	89924.7	57330.6	143473	78175.1	98818.8	95846.9	133420	74416.5	54580	267256	77583.3	143154	74845	87673.6	132701	160415	77155.6	188771	62938.7	66171.9	390261	78823.9	68944.6	49384.3	142412	81686.8	191812	163038	631577	81870.7	57202.9	238257	34530.5
neg-4.625_406.17855	705069	322351	802224	473912	3.19288e+07	1.81088e+06	578014	404924	4.49611e+06	271912	4.23496e+06	510250	3.34104e+06	100342	143175	5.95955e+06	125646	760910	8.20505e+06	398155	3.19753e+07	1.32416e+07	163032	1.05853e+06	177387	106421	4.97727e+06	466155	704866	9.33606e+06	162153	1.35707e+07	163665	585524	465846	591725	100355	1.86814e+07	626488	535372	238892	174899	313120	6.46094e+06	1.05875e+06	109354	327887	164968	82316.3
neg-4.629_159.06833	121617	106852	93437.4	60642.5	101932	3.3549e+07	66504.2	63103.2	91117.4	50165.3	2.7372e+07	70349.7	66011.5	95179.5	65948.2	85482.3	64434.5	68052.4	146760	90610.8	1.52434e+07	60487.6	139015	58934.3	66487.1	79556.6	89924.9	78369.6	82762.3	101620	144654	63203.8	89429.1	61460.8	62684.7	71307.8	65217	96667.7	85183.3	56158.9	72133.5	97422.6	82123.7	60221.7	152324	94894.3	66302.4	58769.5	38715.8
neg-4.631_370.20171	85184.8	72300	54318.9	42476.1	3.19288e+07	1.23502e+06	38675	44199.7	4.49611e+06	35137.5	4.23496e+06	49275.4	3.34104e+06	66667	46192.4	5.95955e+06	137687	47666.3	8.20505e+06	257921	3.19753e+07	1.32416e+07	97370.9	35279.8	46569.9	52575.6	4.97727e+06	51135.2	57969.6	7.11996e+06	92109.2	1.35707e+07	57934.7	43049.3	43906.5	46294	45680.3	1.86814e+07	55973.1	39335.7	50524.8	66318	52394.2	6.46094e+06	106693	65615.1	46440.5	41164.2	27117.9
neg-4.634_366.07781	181312	159300	139301	205482	344473	4.47049e+06	129816	94077	190932	74788.6	1.65814e+07	115628	1.30249e+07	141898	98318.5	149853	2.09941e+06	101456	3.37214e+07	135087	141868	102168	230550	89672.5	99121.9	118606	3.86977e+07	154677	123386	151500	215656	97588.2	133325	135508	104138	107326	98050.4	144117	146319	88155.8	116899	145242	127047	91704.3	227092	141473	98846.6	87616.2	59557
neg-4.638_780.43114	401335	99959.7	75099.6	152567	1.40931e+07	1.08777e+07	64103.1	61109	219305	48580	7.41823e+07	75108	3.77283e+07	79809.4	56234	4.64822e+06	289929	109944	6.08519e+07	80517.4	4.27682e+07	2.49879e+06	134622	55225.8	86250.9	77042.5	3.48602e+07	70697.8	79831	2.32823e+07	127347	61206.5	80098.7	62078.2	147071	179094	63690	1.47762e+07	82491.4	57262.8	75933.1	94343.9	82524.9	9.6479e+07	147511	90717.3	61161.6	49491.4	38686.1
neg-4.659_628.32686	515798	272608	1.28637e+06	159296	409482	1.04969e+06	173718	129729	362419	124157	730390	223630	251597	192267	153833	199765	361456	165265	7.16869e+06	213970	419287	231272	1.20217e+06	166947	164978	260820	229564	879178	169671	315905	6.22709e+07	166551	1.26894e+06	173071	726937	696520	482197	354178	207248	239176	4.89238e+07	196628	244998	1.01449e+06	298791	345805	155475	307918	129350
neg-4.66_514.18452	85161.3	133406	100598	65245.5	1.97592e+07	80008.4	71152.4	137006	83323.4	110588	60628.4	74138.9	948661	151020	55046	81820.7	63356.2	67690.2	1.1237e+07	9.27608e+07	661228	1.30298e+06	105548	184557	67572.7	118578	199408	78585.4	69494.9	379930	225805	106233	81901.2	89490.3	67784.2	70313.8	65233.5	2.63995e+07	84885.7	60087.4	75991.2	80536	194920	1.13536e+08	122380	104674	75762.8	52991.2	52979.7
neg-4.665_389.05757	120249	157661	89156.3	2.55863e+07	129881	1.01522e+06	100468	83250.6	117654	71805.1	405965	109088	130497	111196	77725.8	115532	89460	95579.7	131465	138725	1.13861e+06	90313.9	150608	96552.1	99443.9	100322	110164	110964	117880	127976	701849	98009.8	123635	100094	95712.5	99284.3	92110.8	139688	119860	84844.4	107301	113718	141692	86173	172803	162339	89917.5	74824.4	95067.7
neg-4.671_610.31838	122752	394466	91011.7	90333.2	6.07263e+07	879336	102559	462906	2.88758e+07	73299.4	1.13196e+06	167843	1.70098e+06	140053	79343.3	4.56194e+06	137882	97568.8	5.255e+06	141611	431419	92193.4	153742	98561.4	101513	102410	2.69278e+06	99300.7	4.38275e+06	3.88398e+06	1.0488e+06	6.8462e+06	126208	96125	80780.2	1.26045e+06	94027.6	142595	140551	86610.1	109534	117328	144641	93883.7	146570	165718	165895	113679	111875
neg-4.676_574.34224	108481	394466	80431.3	79831.7	6.07263e+07	1.81053e+06	90636.4	307118	2.88758e+07	64778.2	1.35038e+06	113240	1.70098e+06	123772	73062.3	4.56194e+06	121853	63496.9	5.255e+06	125149	381265	89587.7	135869	93863.4	89712.2	86703.7	2.69278e+06	107176	3.12154e+06	2.84922e+06	926873	6.8462e+06	111536	84950.2	91396.8	1.07135e+06	67690	126018	124211	72756.4	96800.3	103689	127826	82969.5	108178	146453	146609	80260.6	137265
neg-4.691_402.13201	168873	245446	207656	129928	4.28323e+06	369253	149483	182915	137591	127294	170485	153063	266933	467530	251563	282619	449350	147789	764604	2.52171e+07	5.35943e+06	3.15039e+06	1.02888e+06	248933	118206	171687	283866	418860	242253	159905	1.62232e+06	139207	352393	367871	387720	398921	104841	2.41287e+07	211867	244578	151402	209863	195525	6.96842e+06	195499	191239	115067	236379	214600
neg-4.699_421.16423	97897.1	113172	310017	105190	792466	281932	154301	542611	1.10217e+06	342945	78608.7	328338	117793	215573	276321	215278	292657	186732	583824	137228	248444	267212	474406	329370	60498.6	1.30067e+06	655404	465130	185034	80862.5	748032	714054	162485	1.52042e+06	316263	348534	1.28597e+06	171863	204775	157720	467591	305146	793225	586906	1.05849e+06	81469.5	74425.8	474251	98949.5
neg-4.721_291.18376	914221	973477	1.11039e+06	5.41278e+06	5.35037e+06	1.86782e+06	3.57812e+06	9.06084e+06	1.54667e+07	5.46709e+06	372780	3.66962e+06	726601	1.24897e+06	1.36219e+06	7.05509e+06	890139	3.25699e+06	1.44397e+06	1.0772e+08	317384	6.40425e+06	2.81437e+06	1.9114e+07	4.99291e+06	937387	1.72915e+06	1.21664e+06	597511	4.58426e+07	1.8162e+06	3.07872e+06	862871	943045	1.21744e+07	1.1887e+06	4.7868e+07	597998	713555	6.1794e+06	2.94914e+06	4.87367e+06	2.52953e+06	582533	5.24206e+07	2.14523e+06	1.48687e+07	8.11477e+06	2.34611e+07
neg-4.723_248.06874	509221	96719.2	560277	59384.3	920764	418082	108458	220618	98957.8	98866.7	188096	82207.2	366626	630199	362405	320930	449143	397698	728594	791241	7.8557e+07	400727	1.42006e+06	458181	72635.2	329346	872490	613890	301490	98733.6	922833	112121	435385	457707	506821	406019	83340.1	3.69762e+06	360043	392664	76844.3	244775	343858	3.27671e+06	198819	180035	81784.5	356948	108757
neg-4.727_498.22944	926255	6.28077e+06	5.4202e+06	4.47873e+06	7.99744e+06	1.03396e+06	1.12967e+06	3.69724e+06	831342	463142	724379	1.45374e+06	1.64788e+06	3.56901e+06	5.49353e+07	2.89203e+06	759121	1.61096e+06	2.21763e+06	8.39253e+06	833443	558941	2.40013e+06	5.03417e+06	682956	5.14163e+06	1.47464e+06	1.03757e+06	2.26834e+06	1.81707e+06	1.55973e+06	4.61613e+06	4.4699e+06	773595	6.26371e+06	1.35327e+06	6.85288e+06	1.51297e+06	2.24577e+06	1.50874e+06	3.2869e+06	2.00732e+06	1.91207e+06	631579	1.93272e+06	1.21334e+06	2.66845e+06	1.24761e+06	424794
neg-4.731_322.12075	708777	1.00641e+06	779841	2.48233e+06	6.57177e+07	2.80856e+07	2.19897e+06	471616	6.79216e+07	137611	2.11326e+07	1.13364e+06	2.91278e+07	877165	504427	4.93369e+07	625156	1.28299e+07	4.4992e+07	2.25526e+07	2.10499e+08	6.32168e+07	1.97657e+06	1.01178e+06	176668	458411	2.34285e+07	854464	666728	1.59943e+08	1.28448e+06	7.03497e+07	606006	637076	705436	565133	121590	1.01898e+08	501139	2.18436e+06	421188	340699	478611	1.45071e+08	510383	621493	113835	496830	152668
neg-4.731_449.31442	9.26802e+07	1.88187e+07	1.57722e+08	1.27827e+07	1.31143e+08	7.19612e+07	8.68094e+07	3.70227e+07	4.75022e+07	3.73835e+07	1.49933e+06	1.34149e+07	4.91385e+07	4.04109e+08	7.30623e+07	7.53932e+07	9.09211e+07	8.41195e+08	3.60972e+08	3.78096e+06	1.45491e+07	1.80206e+07	16130061410	1.09429e+08	8.66273e+06	3636577102	3.3878e+07	2065228849	2.12161e+07	1.59195e+07	4916330149	1.03757e+07	6.93401e+07	2.47792e+08	8.42475e+08	8.71574e+07	9.14118e+06	8.20146e+07	6.65917e+07	3.35979e+07	2.10747e+07	1.48883e+08	1.73591e+07	3.77885e+07	1.1806e+08	6.49298e+08	1.59694e+07	2.07592e+08	3.81298e+08
neg-4.735_547.24545	639033	359424	1.8657e+06	659256	1.11542e+06	1.09139e+06	2.80393e+06	1.39367e+06	2.63389e+06	1.99043e+06	494574	338692	996114	2.34726e+06	453460	2.5839e+06	1.78633e+06	2.65613e+07	2.96489e+06	256149	439556	488844	2.34087e+08	2.51343e+06	348080	1.22015e+08	1.09491e+06	3.01764e+07	950463	458862	2.43993e+07	241541	593103	4.27372e+06	8.91511e+06	505705	289877	3.00066e+06	660823	736320	660366	8.61377e+06	437831	2.09427e+06	4.46096e+06	1.95365e+07	262622	3.24835e+06	1.84139e+07
neg-4.737_549.23968	545305	286613	1.8657e+06	525707	1.11542e+06	1.49487e+06	2.74611e+06	1.39367e+06	2.45781e+06	2.0743e+06	394386	323916	794326	2.92434e+06	361600	2.06046e+06	1.42446e+06	2.6072e+07	3.00748e+06	204260	642425	489481	1.96641e+08	2.63996e+06	229211	1.06592e+08	873106	2.88274e+07	757923	458862	2.47386e+07	241540	472955	6.16336e+06	8.74603e+06	369157	289877	3.00066e+06	660823	587160	660366	7.29137e+06	349137	1.95454e+06	3.96453e+06	1.99909e+07	262622	3.24835e+06	1.75512e+07
neg-4.737_796.46206	1.50463e+06	126680	579379	77223.4	1.44289e+06	6.45696e+06	82080.3	150600	4.43694e+06	89399.3	1.88052e+07	84872.4	6.53878e+06	589231	721101	4.97585e+06	1.3603e+06	318769	1.89712e+07	412487	8.0887e+06	7.30449e+07	1.3692e+06	459385	112489	340574	1.34949e+06	634819	270215	9.33597e+06	954296	235176	438354	428343	1.3955e+06	4.1916e+06	78457.5	712223	366595	346260	71487.2	190014	260511	1.47869e+07	205597	195907	76084.2	369117	113424
neg-4.745_646.24836	2.46693e+06	3.16137e+06	2.71427e+06	702947	1.08688e+08	6.35736e+06	525427	1.06879e+06	7.79738e+07	478961	1.23734e+07	398254	1.10469e+07	3.05301e+06	1.75568e+06	1.60642e+07	2.17588e+06	2.84618e+06	1.99757e+07	4.35201e+06	3.31046e+07	1.16328e+07	6.87952e+06	2.21966e+06	351882	1.59552e+06	2.57506e+07	2.974e+06	1.46057e+06	4.21678e+07	4.47068e+06	2.45507e+07	2.10923e+06	2.21737e+06	2.4553e+06	1.96697e+06	711406	1.64556e+07	1.74423e+06	1.90226e+06	450696	1.18582e+06	1.66582e+06	2.75821e+07	3.9037e+06	2.16313e+06	396206	1.72924e+06	531369
neg-4.755_328.13157	461812	122714	326049	75703.1	251799	9.36544e+06	84022.7	72862.8	286503	57105.4	399521	76939.2	3.6362e+06	348377	237445	1.10218e+07	185114	106609	2.41457e+06	216068	1.06608e+07	129730	824289	194616	159022	196194	502141	268964	134732	3.78421e+06	881648	301621	336367	179440	260837	4.51364e+06	105906	108838	191776	162851	73252.7	103025	119178	4.23529e+06	127343	192050	75879.2	157797	100124
neg-4.775_658.22741	158659	102457	115293	66738	4.02577e+06	243026	78364.5	102688	77309.1	52784.5	312542	79582.7	104451	190249	132649	140292	120509	80531.3	242359	2.38072e+07	7.21706e+07	7.67585e+06	451954	163666	62602.4	137069	180999	237213	198874	87675.4	477598	89766.8	290968	137287	183052	176662	146672	1.48621e+07	183345	93896.7	67624.1	115298	124669	2.00205e+07	109492	100739	71940.9	93853.6	97488
neg-4.781_330.14726	220613	121318	130143	78237.9	236328	4.74774e+06	91867.8	120383	247903	67884.2	189839	105337	4.76669e+06	223032	185306	868935	141274	94407.9	2.61038e+06	299462	629177	148610	529832	191868	81321.5	180101	847465	278088	267594	633116	559895	439078	377706	160944	214594	1.34909e+06	171946	232118	214939	147791	79276.7	135165	146151	3.99072e+06	150348	121140	88711.1	110026	114287
neg-4.785_300.1728	343498	388802	125124	181083	194048	2.12694e+06	239986	115741	242747	65266.6	182519	194411	312992	214432	178160	345119	446972	86348.7	234260	287915	77179.6	84097.5	509402	184469	120032	173156	382376	267365	257276	311868	538306	182238	363142	154738	206320	2.23548e+06	1.45854e+06	223168	206651	134720	72999.6	129953	1.21165e+06	131870	144551	116468	1.17519e+06	129281	86320.8
neg-4.786_604.39893	447480	351822	425185	348379	7.28193e+07	2.44234e+08	157404	222701	3.95837e+07	356151	3.73211e+06	242845	2.16075e+06	681314	377645	1.68731e+08	261349	226777	2.63511e+08	553988	1.36928e+07	2.15744e+07	980158	546195	327004	333176	3.49109e+06	514447	1.28413e+07	1.6964e+08	1.03577e+06	387164	698735	297737	493419	480799	318089	3.81234e+07	468022	203635	275957	523615	270371	2.80477e+08	428458	886144	225873	688066	166093
neg-4.8_506.34428	1.51722e+06	792957	982266	278748	504765	125925	597269	352745	207151	259067	114020	305138	355912	172502	599393	184695	119179	243905	1.56181e+06	300400	334782	1.57616e+06	1.86703e+06	551816	306549	268478	336200	7.79881e+06	252149	472964	2.44305e+07	255676	291770	390544	830224	997398	72539.1	342406	116369	396922	305666	565530	676731	158068	124313	704121	379349	203344	321278
neg-4.801_505.34075	7.07886e+06	172726	6.08227e+06	945476	2.61906e+06	145361	212721	749585	332064	154415	141793	553012	114733	388891	158826	124697	110388	503788	7.45661e+06	322488	493168	2.84716e+06	6.93899e+06	146392	759479	503348	1.05816e+06	3.13015e+07	270454	849267	1.19533e+08	1.35621e+06	362841	1.13296e+06	4.81439e+06	149562	147872	478231	176036	77056	1.29954e+06	661723	268102	230654	387012	219864	722660	453788	691484
neg-4.812_324.13658	385889	397476	367412	187305	3.53772e+07	1.55521e+07	285582	888504	3.15253e+06	348061	789024	101835	21119744	209757	315593	1.34802e+07	231915	391043	5.95455e+07	2.12338e+06	2.28909e+07	4.63752e+06	298180	159279	139043	177712	2.40713e+07	153710	781775	1.00112e+07	333920	5.81775e+06	352434	147626	140964	281886	346300	1.85104e+07	295849	286120	590951	338579	269256	2.12276e+07	873240	522549	302699	336246	291637
neg-4.817_271.19017	357394	380805	182748	111635	206670	188446	159476	146128	152730	98743	345206	143175	171780	235971	147991	205039	152405	7.92055e+07	270140	539700	179534	117080	458346	167942	128594	336917	245837	190742	250599	465537	592260	131359	579263	138211	198081	179703	199283	195673	231032	128724	153267	175497	156952	216344	195649	171788	141760	134642	140364
neg-4.826_525.35866	372857	2.25368e+06	5.10007e+06	1.34802e+06	628540	1.04388e+06	7.96861e+06	138790	684648	505354	437950	444815	950201	774535	731749	1.48736e+06	1.02815e+06	632773	342717	1.87878e+06	1.35968e+06	1.48002e+06	581488	916910	1.75253e+06	902073	383711	1.75322e+06	2.33177e+07	1.57277e+06	731090	209765	713838	854676	877765	2.44528e+06	4.22867e+06	2.922e+06	1.22749e+06	165866	921771	608961	927451	1.22391e+06	1.82124e+06	473638	1.15029e+06	890056	764668
neg-4.838_664.4199	101256	250458	120194	80824.8	200348	1.98259e+08	104889	67073.3	128347	63494.6	177004	94167.5	842799	153254	94447.6	212846	81667.9	142341	1.25297e+06	283000	118081	82169.1	182247	110457	84577.5	221593	873950	113358	171756	306187	274232	84802.9	241146	85525.9	133181	93918.6	131070	130992	158067	85988.9	89002.1	171405	103228	5.10721e+07	140341	146519	121848	93227.1	74706.6
neg-4.841_463.33048	6.6366e+06	272790	2.46392e+06	668941	3.49883e+06	3.07501e+06	897338	3.91625e+06	2.76637e+06	1.03822e+06	180585	581490	4.01211e+06	7.75761e+06	4.81865e+06	1.70613e+06	3.73213e+06	1.75941e+06	8.67285e+06	288725	177168	1.17796e+06	9.35915e+07	2.15004e+06	1.04545e+06	1.10909e+06	1.55925e+06	4.8063e+06	507217	952771	2.61563e+07	1.94052e+06	6.95335e+06	5.91816e+06	2.18904e+07	1.28512e+07	341039	1.24624e+06	323404	1.49986e+06	299415	849792	1.07389e+06	4.3258e+06	143181	428786	743403	9.55103e+06	541902
neg-4.851_354.24113	8.82778e+06	1.21454e+07	4.6376e+07	5.34692e+06	3.47571e+08	1.1909e+07	1.30442e+07	1.16278e+07	8.27682e+06	6.98854e+07	2.25133e+07	3.8455e+06	8.9319e+07	1.12368e+06	2.69051e+08	6.01061e+06	4.26121e+06	5.30996e+07	422892	1.50057e+07	2.93855e+07	5.75106e+06	6.47479e+07	3.78471e+07	6.80666e+06	5.41237e+07	7.43767e+06	9.14553e+07	1.1437e+07	4.60076e+06	2.65987e+06	5.23104e+06	3.37482e+06	7.44394e+07	4.43081e+07	8.38166e+06	2.93965e+06	6.13933e+06	7.5887e+07	2.4609e+08	6.34259e+06	3.33639e+07	1.36643e+07	5.38606e+07	1.60203e+07	1.61738e+07	6.73056e+06	3.96883e+07	1.28707e+07
neg-4.86_180.07863	255957	188485	171920	82629.2	211323	96329.4	166879	145585	155855	479847	75713.1	84991.5	458693	151543	552749	304968	466637	84422.8	4.41713e+06	514676	90716	1.53222e+06	276883	355938	101988	115338	112330	84373.2	125207	301115	140628	2.86945e+06	118286	1.98075e+06	113721	196557	1.46491e+06	82727.2	76326.5	341273	617515	285030	3.05459e+06	102974	1.21976e+06	120617	137720	382465	110222
neg-4.866_570.32327	1.84364e+07	6.83454e+07	4.13937e+06	8.96133e+06	1742397080	9.22628e+07	6.902e+06	1.27877e+07	1217198516	1.21726e+07	1.42369e+08	8.58643e+06	1.26767e+08	4.05366e+06	1.39919e+07	2.01872e+08	1.63688e+07	8.08392e+06	2.88869e+08	1.49529e+07	1.52042e+07	4.93121e+06	1.40147e+07	5.33425e+07	3.37961e+06	4.97879e+06	2.00407e+08	8.85592e+06	1.22852e+08	3.04646e+08	6.78942e+06	3.05587e+08	4.85014e+06	1.32074e+07	1.06441e+07	112237639	4.99637e+06	8.20079e+07	7.97626e+06	5.19401e+06	4.14608e+07	7.24408e+06	2.23818e+07	5.71449e+06	2.4795e+07	2.65418e+07	1.42006e+07	9.60937e+06	2.14215e+07
neg-4.872_372.19748	9.40127e+07	6.87982e+06	2.09411e+07	2.78558e+07	1.74746e+07	1.08499e+07	6.73315e+06	7.9247e+08	6.26446e+06	4.23105e+06	1.16269e+07	9.40584e+06	5.42988e+06	1.46762e+07	4.59508e+08	3.45911e+08	2.05705e+08	8.59938e+06	1.08293e+07	1.80009e+07	1.2384e+07	2.46638e+07	7.45874e+06	6.02e+06	3.21638e+07	3.37846e+06	1.36384e+08	1.46465e+07	1.52064e+07	1.21642e+07	2.352e+07	1.26352e+07	3.67887e+08	1.84877e+07	1.80623e+07	4.53047e+08	1.14176e+08	1.32748e+07	1289122729	6.10188e+06	5.88126e+06	3.72477e+06	1.99062e+07	1.42873e+07	1.17765e+07	9.19912e+06	3.18993e+07	7.8594e+06	5.1634e+06
neg-4.878_402.20809	6.62436e+07	9.34073e+06	7.51855e+06	4.31673e+06	7.86098e+07	5.05156e+07	1.56832e+06	5.98313e+06	1.01073e+08	1.46517e+07	6.80214e+07	7.27727e+06	1.0608e+08	8.47446e+06	1.68261e+06	159924918	4.75723e+06	663259	4.54563e+07	1.34466e+07	6.51895e+06	6.67865e+06	1.65461e+06	6.07901e+06	6.90759e+06	1.03033e+07	1.12957e+08	1.80749e+06	1.58404e+07	3.53391e+08	823281	1.96055e+08	967057	957744	3.80662e+06	1.13339e+07	1.16181e+07	5.70174e+06	9.98196e+06	2.39022e+06	1.10393e+07	2.02537e+06	6.1644e+06	3.40225e+06	942487	869014	8.63485e+06	2.53755e+06	6.01408e+06
neg-4.882_652.29548	933750	1.31727e+06	737713	425094	2.8487e+06	6.73502e+06	704570	900456	4.54643e+06	338689	5.40614e+06	618873	1.49321e+07	900547	649956	1.08018e+07	804305	573138	1.41581e+07	1.86692e+06	621039	432164	1.14023e+06	580941	444831	1.17706e+06	1.23226e+07	596199	866865	1.8266e+07	1.61615e+06	1.52333e+07	1.4246e+06	628729	700457	705244	944952	676866	552344	495012	487039	1.6938e+06	1.12687e+06	748372	1.59869e+06	1.21539e+06	732171	1.54742e+06	680008
neg-4.883_530.2226	306126	270737	253803	117077	471511	104544	186525	84532.3	272248	1.38945e+07	119659	154239	177294	259644	184207	228394	139321	195116	199782	220242	119834	127698	202644	184322	148802	308824	7.57318e+07	150430	128432	356539	239966	124859	192024	167667	186085	120642	158819	134817	190028	160818	147924	548766	364433	132291	529386	198244	146802	9.14854e+06	233950
neg-4.885_395.1902	390054	283028	265325	119916	364819	102916	194994	88370.1	284608	9.54593e+06	125092	173361	185343	271432	192570	238764	145646	203975	239893	299032	125274	133496	211844	222397	132826	322845	2.68116e+07	157260	134262	332165	236180	144942	215487	175279	219677	532430	182173	140937	198656	168119	154640	573680	380978	138297	553420	207245	153467	8.50951e+06	244571
neg-4.902_220.07374	70062.4	86834.7	88318.9	50484.2	151437	682661	60402.2	44034.6	76446.3	46236.5	54160.1	79810.4	71930.1	79780.2	62367.8	79522.8	60080.2	82678.2	94045.9	588632	3.2637e+07	85035	92025	72944.8	50641.5	96746.8	78071.4	67355.4	45429.4	121853	110091	67562.1	104996	95789.5	102399	60853.4	77391.9	215218	74932.7	78723.3	60373.3	174933	177586	776130	185246	74024.4	58304.2	46189.1	114003
neg-4.902_552.31244	1.69632e+07	6.29897e+07	1.91856e+06	7.21512e+06	5.06798e+07	6.15184e+07	1.29529e+07	7.78527e+06	1180048601	5.32578e+06	1.27766e+08	1.02456e+07	1.0967e+08	2.45609e+06	4.36008e+07	1.83806e+08	1.85559e+07	3.53254e+06	268165729	1.5705e+07	1.90076e+07	2.42391e+06	1.34421e+06	5.22824e+07	1.64126e+06	3.57242e+06	179329207	1.31977e+06	6.83372e+07	3.27948e+08	1.9867e+06	3.01698e+08	1.09413e+06	3.69768e+06	3.45834e+06	109622969	3.68007e+06	4.44627e+06	1.49389e+06	1.23539e+06	4.85074e+06	3.42921e+06	4.12783e+06	2.94647e+06	5.04386e+07	3.02806e+07	8.39144e+06	7.0713e+06	1.40137e+07
neg-4.904_394.14582	118555	160869	199469	102873	879305	508808	102209	118284	889918	83451.1	650867	135050	3.7375e+06	147639	105535	5.50024e+06	101664	139903	1.47728e+06	150891	98172	177663	180436	131744	143274	163709	1.66566e+06	113974	94121.8	1.78009e+06	186289	160326	177668	162089	173273	102972	130958	1.05933e+06	126796	133211	102160	335043	9.02344e+06	8.80927e+06	313461	146588	117636	78158.2	192908
neg-4.904_416.32568	130309	97156.3	407619	250686	196374	164524	1.66344e+06	184347	618225	536509	247604	424196	80480.1	145272	90335	88975.3	210023	720666	105225	2.17524e+06	162789	65017.9	491094	186550	197900	179735	5.37829e+06	157390	438658	317670	1.0084e+07	625834	117477	1.36468e+06	955646	343849	483428	135829	3.3368e+06	170556	155475	195726	198695	234232	207265	127533	65234.5	273409	414569
neg-4.913_384.19759	1.46695e+06	5.86762e+06	466649	458050	1.14742e+08	1.11465e+07	456104	977037	3.84936e+07	595511	7.93579e+06	663266	1.4552e+07	237283	523227	6.99865e+06	631802	266751	1.52094e+07	2.14413e+06	1.09273e+06	384897	252632	405063	777251	937158	1.72174e+07	402321	512127	8.14348e+06	1.28282e+06	1.20621e+07	489329	565034	386205	2.79346e+06	1.56484e+06	413772	262615	186511	1.01447e+06	469100	528927	671810	581664	474747	7.57609e+06	329278	398659
neg-4.916_650.40448	1.0768e+06	859166	439578	323875	5.33364e+07	1.7612e+08	282689	155860	2.9322e+07	296777	416981	263882	1.88321e+06	598277	928956	1.22332e+08	159020	56969.3	1.89861e+08	86368.1	5.7476e+06	1.51123e+07	188447	156365	339279	87050	1.39467e+06	74237	1.26058e+07	1.22578e+08	153343	108513	1.05095e+06	96362.4	1.39591e+06	194223	67148.2	2.71063e+07	156100	171092	314710	563547	546762	1.99537e+08	295977	923407	291666	736665	59307.6
neg-4.947_316.26148	6.97326e+06	3.22941e+07	4.48813e+06	1.23819e+07	569407	7.24822e+06	1.34119e+07	1.92818e+07	3.94908e+07	3.69237e+07	1.41625e+07	2.29615e+07	1.72635e+06	1.32977e+06	6.06169e+06	1.60673e+07	1.01843e+07	3.13162e+06	1.25612e+06	1.87086e+07	3.31642e+07	1.0123e+08	1.52885e+06	4.05472e+06	3.44606e+07	2.64588e+06	7.22865e+06	1.20413e+06	1.42444e+07	6.42585e+06	611649	3.65435e+07	4.50821e+06	2.33571e+07	6.11132e+06	6.18291e+06	2.97611e+06	6.36769e+06	1.15606e+06	2.07215e+06	1.5668e+07	2.31851e+07	3.59467e+06	1.67488e+07	7.12524e+06	1.86974e+06	3.73928e+07	5.64167e+06	3.65629e+06
neg-4.951_778.45184	94353.8	113901	80794.3	101445	339818	1.93414e+07	171724	81402.9	1.75683e+06	85277.7	81075.2	129471	1.94525e+07	100563	327334	2.44669e+06	94013.5	76403	117606	556502	846857	2.20471e+06	138428	95457.5	118471	86618.9	104683	116941	551918	2.61179e+06	184317	106983	97476.9	2.33369e+06	118564	92640.3	66121.1	385081	72832.1	71287.6	98792.8	75743	104156	1.21665e+07	133008	103904	93701.8	70839.1	57939.6
neg-4.957_580.30768	124957	154958	135271	179933	1.52589e+06	2.14468e+06	234944	161180	7.99688e+06	129059	5.1577e+06	214017	2.26755e+06	130586	94054.8	3.32839e+06	139086	129590	3.90592e+06	154004	141828	120415	191225	110516	177404	149986	2.61206e+06	118137	91339	1.20269e+07	239346	1.22245e+07	126579	163877	141287	125873	136385	253920	107523	122287	271255	98356.3	153027	132496	247252	138862	156275	120268	112255
neg-4.96_604.39889	1.56002e+06	1.76693e+06	1.40437e+06	541262	7.38886e+07	2.51504e+08	670839	323263	4.03195e+07	463079	1.2299e+06	540844	2.20357e+08	518212	883711	1.72178e+08	440662	364088	2.72091e+08	398837	4.79243e+07	2.22226e+07	1.53335e+06	479086	599294	301981	3.14476e+08	359396	1.31334e+07	1.71764e+08	481898	1.76506e+06	1.25424e+06	287264	449297	919847	274596	3.93136e+07	271870	285660	546402	195831	757822	2.89162e+08	639574	1.19891e+06	355421	811455	190554
neg-4.969_552.31267	4.91632e+06	3.95518e+07	1.24313e+06	1.55965e+08	8.76951e+08	5.21316e+07	2.96406e+07	3.89206e+07	7.88206e+08	4.85873e+06	8.18733e+07	1.43589e+08	7.74789e+07	1.03637e+08	4.36933e+07	1.40963e+08	6.7418e+07	1.16792e+07	2.24554e+08	9.79368e+06	1.07024e+07	5.00065e+06	1.02307e+07	8.95585e+06	3.46402e+06	1.15565e+06	1.05861e+08	6.18931e+07	5.24134e+07	2.14214e+08	6.55542e+08	2.84541e+08	1.82244e+08	1.33683e+08	1.40724e+07	9.34605e+07	3.13836e+06	9.28958e+06	3.60703e+06	5.61759e+06	1.25696e+07	7.31792e+06	1.48221e+07	6.1886e+06	2.09545e+08	1.64899e+08	7.36192e+06	1.50527e+07	7.64781e+06
neg-4.97_667.39466	752215	149270	84783	112776	888575	8.09838e+06	178583	101022	778941	80889.7	2.44048e+07	238819	6.89042e+06	546632	267203	3.54069e+06	284187	134196	7.39092e+06	96524	1.1485e+06	347703	332901	69267.3	140640	127478	8.93881e+06	310253	2.38671e+06	2.52347e+06	369443	183829	128812	102712	120936	336177	103062	804516	67391.7	541727	170013	61318.6	149760	8.96948e+06	164272	343216	149469	97440.5	192647
neg-4.975_996.69212	56108	106938	74861.1	80793.1	78275.9	398028	127938	72372.7	1.68412e+06	58858.9	1.86811e+06	96097.2	8.62389e+06	63940.4	41769	1.24845e+07	62451.8	72550.5	412989	69150.4	2.13011e+06	567463	89133.6	49623.5	100755	91325.9	1.85613e+06	53686.7	39337.3	1.55915e+07	107470	131696	74535.8	73583.6	86638.9	56518.9	73834.5	2.01503e+06	48279.8	54908.9	121798	43929	107289	366879	117685	66912.6	107080	54002.2	50404.3
neg-4.979_604.39889	1.4157e+06	1.20306e+06	1.53752e+06	427735	7.38886e+07	2.51504e+08	778304	335328	4.03195e+07	283803	475963568	532635	2.20357e+08	545700	210749	1.72178e+08	440705	336152	2.72091e+08	354396	4.79243e+07	2.22002e+07	2.22459e+06	421476	574120	423145	3.14476e+08	1.75945e+06	792195	1.71764e+08	684449	670001	437682	384076	638548	429186	342101	3.93136e+07	285405	329199	692834	447249	497108	2.89162e+08	663881	1.24002e+06	514223	282558	264044
neg-5.005_406.17838	121950	165617	129866	107104	2.71e+06	1.24758e+06	96398.8	81139.3	549318	68186.8	65608.4	108930	1.19886e+06	159837	99520.3	1.39298e+06	88018.1	84521.9	2.44892e+06	86161.8	3.85135e+06	801179	145054	84229.2	108852	73422.9	2.45973e+06	150074	69625.1	2.55937e+06	163719	2.73004e+06	117535	76089.4	138543	83231.8	57510.3	2.1746e+06	58834.4	72677.9	113759	99737.5	96759.2	1.86561e+06	92080.6	89030.4	140496	96447.7	72996.6
neg-5.005_507.35629	1.77024e+08	4.07032e+06	4.22222e+08	1.12124e+06	6.63403e+07	1979932	1.82994e+06	5.07003e+06	356022	661344	681033	893262	1.81086e+06	2.59838e+08	6.22886e+07	5.09029e+06	3.22847e+07	1.74503e+07	5.32337e+08	83845.8	753135	81546.2	1.68779e+08	3.24188e+06	341641	8.33965e+06	7.48449e+07	2.50816e+08	5.02484e+06	438080	3.10896e+08	2.19742e+06	4.97336e+07	3.75133e+07	1.1175e+08	9.35877e+07	55964.4	9.75893e+07	869697	1.48179e+07	110701	1.07572e+07	492803	1.28895e+07	2.41603e+06	3.29935e+06	176837	1.20412e+07	1.04418e+06
neg-5.01_324.13667	109928	199464	254539	81618.2	2.44818e+07	6.99781e+06	326410	688147	3.8915e+06	221806	725743	93892.5	1.80419e+07	196837	283217	9.06807e+06	248942	336026	1.99695e+07	1.46185e+06	1.32338e+07	1.05258e+06	144898	273898	174394	338450	1.1509e+07	228300	408802	1.51187e+07	148269	3.45183e+06	199100	134109	124885	124237	158806	1.73797e+07	165811	130112	440105	262957	166639	8.42159e+06	522138	457342	205742	172935	169910
neg-5.01_340.13152	108668	147579	115722	80682.6	7.85661e+06	5.81084e+06	85899.4	62919.1	939473	49229	56002.7	76178.1	6.08437e+06	142428	88680.9	1.10509e+07	78348.5	84174.2	7.42454e+06	286559	707046	165442	129255	75055.2	96996.6	69299.4	1.32764e+07	133729	62041.8	6.12141e+06	145887	1.99879e+06	104734	61562	123453	74166.5	54891.7	3.43611e+06	52426.4	127841	93185	88874.5	76478.7	5.48079e+06	66347.1	79333.6	94947.4	85943	46032.7
neg-5.018_502.33011	1.50445e+06	2.03975e+06	1.42937e+06	2.89354e+08	8.39263e+06	1.83478e+06	276559	1.60222e+06	8.36833e+06	4.54338e+06	8.83369e+06	439588	1.32181e+06	1.25553e+06	828257	2.12292e+06	683934	4.42071e+06	741992	4.27432e+06	4.773e+07	8.89768e+07	1.26189e+06	1.13776e+06	1.11807e+06	444556	1.49779e+06	1.3029e+06	1.55711e+06	5.99031e+06	3.34849e+06	9.53847e+07	6.70844e+07	2.6201e+06	1.21075e+06	910458	278566	1.17016e+08	625158	976084	5.22401e+07	1.07537e+06	3.72471e+07	2.7441e+07	806766	608177	9.59518e+06	2.78002e+08	639791
neg-5.018_572.23292	105214	114665	107781	79367.7	83266.6	61689.7	65474.6	61732.4	79670.7	694477	63682.8	80135.6	71198.4	124654	67464.7	96781.8	69470.2	81498.8	103039	71631.6	66903	60939.8	125147	72669.7	78671.7	67096.8	7.46009e+07	104388	48900.4	135006	141250	182732	101405	75887.9	108697	71809.2	83697.6	121602	50760.1	62703.7	92798.9	141033	74047.9	65636.8	95585.6	76812	76117.3	764348	44569.6
neg-5.032_326.15216	96370.7	146144	228251	117977	5.11486e+07	2.79377e+07	102458	89582.3	1.25788e+07	82334.7	89640.8	134002	4.77185e+06	153981	87995.2	3.76753e+07	302714	95300.6	8.74452e+06	1.27925e+07	1.68934e+08	2.84019e+07	109691	85775.4	132007	90781.3	2.89276e+07	79076.1	52758.7	6.97557e+07	371489	4.61848e+07	95867.5	86865.8	119279	164771	87689	7.57484e+07	49280.9	67149.1	133218	154313	92932.5	7.51538e+07	126183	78713.1	148561	98231	58620.9
neg-5.032_426.20828	1.93631e+06	8.10966e+06	6.0064e+06	1.94295e+06	3.49377e+06	4.6811e+06	2.59391e+06	2.7493e+06	3.4738e+06	8.15595e+06	8.26051e+06	3.97138e+06	7.11484e+06	7.58471e+06	2.80887e+06	3.26332e+06	2.14288e+06	2.52748e+06	9.07553e+06	1.70533e+07	2.83079e+06	597256	6.59102e+06	7.67184e+06	653403	7.85586e+06	4.50421e+06	2.30448e+06	7.43209e+06	8.51934e+06	5.86571e+06	7.89146e+06	2.25134e+06	8.98279e+06	3.3993e+07	1.70427e+06	8.52683e+06	8.33232e+07	1.46956e+07	1.90318e+06	8.8275e+06	3.50623e+06	4.34351e+06	2.34594e+06	2.06539e+07	748132	4.12552e+06	1.49108e+06	4.5428e+06
neg-5.035_340.26173	462803	402527	269689	1.27564e+06	208350	216871	1.03237e+06	2.69112e+06	4.09278e+06	2.82799e+06	231425	320037	178153	367755	404567	326682	396882	964958	286379	836855	784539	503605	313143	712189	1.90589e+06	321641	300820	391138	137773	475030	370936	579506	373481	1.20839e+07	362318	317215	277718	476744	295928	309250	426418	8.1772e+06	311477	988847	301363	300871	381898	294387	5.00875e+06
neg-5.035_562.39857	349043	779720	6.76024e+06	263807	294620	572144	1.04734e+06	381500	207636	92376.4	190898	150345	79051.3	1.59209e+06	258879	1.29651e+06	492301	236762	3.18542e+06	223546	254693	165711	5.23006e+06	346902	333732	505375	197625	260784	168144	223156	8.42688e+06	440750	223654	1.48474e+06	2.55383e+06	1.615e+06	98383.8	1.20996e+06	104112	488370	176901	173134	347326	3.01378e+06	141572	250817	166680	784613	204914
neg-5.038_408.21552	95989.6	768376	99269	117510	6.27393e+06	1.47274e+06	102053	165289	1.43913e+07	82009.1	928407	1.07856e+06	1.18652e+06	153373	87647.2	1.07643e+06	125481	94923.7	853362	139163	85922.4	175576	105637	85436.3	340951	90422.3	2.12827e+06	54164.4	92700.9	3.06093e+06	99967.8	3.79397e+06	103102	86522.3	118807	83235.1	87342.3	522236	392702	66883.5	225051	153703	99794.2	214014	125684	192715	190709	110360	259627
neg-5.044_394.10959	164723	832851	170351	201653	124765	640206	175128	153120	194098	140732	2.95977e+06	229044	4.97671e+06	263195	150407	233801	242605	162894	8.71742e+06	238811	147447	252455	190751	146613	225635	155169	7.10208e+06	92948.9	87800.1	339970	171550	414741	467254	148477	203879	142836	149884	341197	171696	114776	227705	459286	158846	1.55486e+06	215680	173439	273318	405994	119721
neg-5.067_340.26182	284623	477514	126081	1.01064e+06	170250	172478	892899	2.18463e+06	2.92565e+06	859476	101817	245804	85705.6	459870	194983	268641	241149	351290	176121	527774	784539	671146	165601	420552	2.32902e+06	341914	348809	86157.7	151311	422442	323103	342256	189942	1.20839e+07	232270	151661	373752	423137	148906	397704	426418	8.70678e+06	934044	1.03063e+06	246399	217110	430809	360621	1.11417e+06
neg-5.074_333.23088	91452.8	678655	90355.3	55497.1	69864.3	190573	48420.5	3.19335e+06	120854	64788.1	50552.7	92374.3	59068.7	90583.7	118647	65915.2	67620.9	73502.8	114083	492191	227174	577618	118677	66445.2	62960.9	71343.8	85013.9	59262.2	59029.9	2.83191e+06	120691	115155	97730.7	443528	60526.2	301610	65147.7	58139.3	54123.1	51576.4	3.42757e+06	524138	295024	52801.2	73545.8	74337.8	1.48936e+06	55990.9	52699.7
neg-5.077_450.2082	1.43899e+06	5.19702e+07	6.46642e+06	1.03552e+07	1.87669e+07	1.19177e+07	1.07501e+07	8.75864e+06	4.81981e+06	6.26052e+06	2.10506e+07	6.82456e+06	1.89446e+07	2.69183e+07	2.51607e+08	2.55066e+07	4.06529e+06	6.11608e+06	3.1525e+07	4.66033e+07	7.49312e+06	2.34001e+06	5.73094e+06	2.56753e+07	1.72549e+06	4.62497e+07	4.12428e+07	1.11815e+07	1.80136e+07	6.58934e+06	7.689e+07	1.40984e+07	5.17151e+07	3.85683e+06	3.80108e+07	2.13991e+07	4.49385e+07	2.02506e+07	1.74994e+07	4.61007e+06	1.20689e+07	2.78967e+07	4.87387e+06	3.22663e+06	2.28938e+07	1.12115e+07	1.0508e+07	2.9418e+06	1.31831e+07
neg-5.079_266.18835	1.14425e+06	2.47976e+06	348096	5.6554e+06	803817	7.63556e+07	578430	7.98037e+06	1.88014e+06	2.25307e+06	173448	1.22819e+06	410735	532005	1.43086e+06	6.55409e+06	2.15685e+06	539457	448954	4.44935e+06	1.00635e+06	1.86824e+07	334515	609654	680905	250259	408115	184383	372809	5.55709e+06	340192	1.67116e+06	288982	1.90555e+06	2.88556e+06	1.64215e+06	1.69338e+07	1.15701e+06	430774	4.12591e+06	7.32147e+06	5.21085e+06	5.23959e+06	621039	435472	385180	6.06911e+07	1.76798e+06	1.11133e+06
neg-5.081_502.33023	479421	2.13216e+06	108461	2.39589e+06	6.53323e+07	1.17037e+06	404473	698968	4.87558e+07	307956	3.93066e+06	2.81339e+06	813850	331959	363004	2.13839e+06	840276	437789	5.54278e+06	322661	4.207e+06	1.28924e+06	334074	426542	821006	173015	4.10504e+06	223003	9.7581e+06	2.08429e+06	137635	1.45139e+07	520998	513193	265380	3.88565e+06	104382	1.13822e+06	626643	387884	1.56254e+06	368177	808577	840977	1.32359e+06	865348	1.24891e+06	401329	938689
neg-5.083_558.35987	175393	2.12389e+06	182403	3.16195e+06	3.23663e+07	133745531	1.29727e+06	2.99034e+06	7.10025e+07	4.40168e+06	1.14088e+08	4.82796e+06	1.34773e+08	173726	118873	1.94065e+08	141916	185909	2.23354e+08	3.51328e+06	944870	5.834e+06	240843	318163	3.57351e+06	3.63902e+06	2.52937e+08	119698	3.68095e+06	2.50325e+08	231467	1.77013e+08	187433	160609	118079	127818	149710	1.20004e+06	511241	111066	630503	519227	755041	3.09003e+06	1.93035e+06	142569	5.89784e+06	3.3043e+06	203512
neg-5.089_866.50456	73219	96374.4	103160	93716.8	75778.5	4.58144e+07	768246	69161.2	91856.5	66909	1.0773e+06	92995.3	3.1383e+07	94043.5	66636.5	5.42513e+07	80261.8	105142	126168	2.00772e+07	640120	5.99281e+06	129526	69902.8	100670	89652.7	92210.6	67696.2	58210	6.46845e+07	130908	108481	89041.5	58496.9	65650	72288.4	84669.6	2.17109e+06	57319.7	62814.3	149266	80656.2	67557	2.70781e+07	79254.8	75134	88720.4	53201.1	84725.8
neg-5.091_529.30806	9.84593e+06	5.83703e+07	2.64466e+06	8.90242e+06	3.32218e+07	1.33752e+07	2.81676e+07	1.33077e+07	1.6011e+06	4.74942e+06	1.08791e+07	1.31679e+06	1.83097e+07	2.21252e+07	1.49766e+07	9.32892e+06	7.11617e+06	3.1042e+07	7.55845e+06	5.80934e+07	1.01346e+06	1.26338e+06	1.5155e+07	3.40942e+06	9.25748e+06	955244	8.84839e+06	9.61956e+06	3.89195e+07	7.05757e+06	3.32072e+08	8.99227e+06	6.41875e+07	1.76325e+07	7.86381e+07	1.64574e+07	1.32916e+07	9.75506e+06	1.06817e+07	7.02959e+06	1.68237e+07	1.42203e+07	1.32994e+07	1.44212e+07	5.44088e+06	1.54387e+07	1.56524e+07	1.75199e+07	1.78377e+07
neg-5.094_336.10031	210217	88444.6	94671.5	318869	4.33775e+07	7.94949e+07	212120	459195	2.5603e+07	253787	3.76274e+07	2.98295e+06	1.14604e+08	86305.5	61153.6	102293073	342944	1.68638e+06	148431606	1.15277e+06	131746508	2.36571e+07	125003	360368	318075	148440	1.0332e+08	62126.1	97355.8	1.67749e+08	113124	1.19239e+08	81715.1	53683.7	95156.1	110155	77702.9	6.60042e+07	84833.1	2.09289e+06	126776	135772	931418	1.42062e+08	718515	68951.9	91244.4	82146.7	221217
neg-5.105_296.10523	73417.9	91962	91170.2	89426	272271	3.05954e+06	55998.8	65994.7	211430	60328.9	64231.1	112966	4.22869e+06	81785.8	60267.1	4.2286e+06	76587	100328	1.62352e+06	201006	503488	740199	138941	124373	101459	70506.7	520568	75027	55544.9	3.02982e+06	120691	641552	87461.5	62409	63722.9	71846.8	71452.8	376289	54304.7	67643.9	131817	76963.4	76449.4	8.08932e+06	70934.1	71694	94873.1	134093	109828
neg-5.106_284.19903	8.58561e+06	5.78675e+06	1.12052e+06	8.9831e+06	5.93098e+06	8.07693e+07	5.38474e+06	1.10756e+07	7.57072e+06	3.31645e+06	1.58454e+06	2.32265e+06	2.56055e+06	2.35495e+06	5.98158e+06	1.10365e+07	9.99505e+06	4.59448e+06	1.26776e+06	4.84253e+06	1.99098e+06	2.01891e+07	1.9775e+06	2.14073e+06	2.68808e+06	4.70601e+06	3.99493e+06	5.14674e+06	9.87046e+06	7.15949e+06	1.41982e+06	3.43289e+06	2.25263e+06	1.45182e+07	7.41527e+06	5.43213e+06	1.92422e+07	6.95464e+06	2.35552e+06	5.32523e+06	7.63179e+06	7.95353e+06	7.1798e+06	8.40307e+06	2.88296e+06	2.7795e+06	6.70548e+07	2.65243e+06	1.17592e+06
neg-5.106_320.1052	66493.2	83288.2	82571.1	139985	9.85693e+07	6.36371e+07	354360	59770.1	4.27855e+07	52366.4	3.1332e+07	170307	7.69149e+07	74071.9	54582.8	9.49435e+07	2.74386e+06	1.01229e+06	1.46929e+08	1.18744e+07	1.68906e+07	5.74194e+07	125836	73999.7	91889.7	63856.6	9.27742e+07	67950.6	44113.7	1.2422e+08	109307	8.19191e+07	79212.3	56522.7	57712.6	408224	64713.5	7.15401e+07	49182.7	198881	119385	68726.4	69238.8	5.10675e+07	74213.2	76164.4	85924.7	121446	99469.4
neg-5.113_326.14778	820153	1.0978e+06	636869	714766	4.40752e+06	3.96884e+06	667367	858022	6.10805e+06	461527	2.10449e+06	968838	1.11219e+07	2.2233e+06	837800	7.19991e+06	745712	620747	2.29473e+07	1.20179e+06	3.4576e+06	962040	1.54967e+06	525041	859838	612800	8.29732e+06	599248	1.92383e+06	1.3327e+07	2.54281e+06	2.62959e+07	859940	672271	599434	524552	1.1811e+06	1.30021e+06	1.11288e+06	444055	822401	787854	896455	1.39953e+06	1.75349e+06	998298	1.04154e+06	1.9123e+06	656649
neg-5.119_334.21498	585943	524207	676093	549874	605038	1.76637e+07	308003	465466	2.7575e+07	924630	2.26457e+06	933653	2.36034e+07	324151	567592	6.4142e+07	8.53635e+06	639258	7.04093e+07	406762	889496	633323	722070	691160	705737	469874	8.00281e+07	350217	264120	3.03689e+07	435731	4.09713e+07	503976	584911	604671	390737	206716	570057	215300	391339	598566	289638	712287	489118	438922	628430	520839	720438	915136
neg-5.133_652.2947	735658	875085	571256	617910	553215	3.31885e+06	453366	786396	612982	342398	5.2911e+06	869024	5.88251e+06	1.99425e+06	514662	3.28259e+06	654156	1.01501e+06	1.26314e+07	2.42999e+06	3.10139e+06	557444	1.80916e+06	406987	755431	458786	6.76538e+06	598757	988368	9.4086e+06	2.28084e+06	1.52333e+07	771345	543205	437131	470510	1.13596e+06	597775	1.06611e+06	398306	706924	412747	656313	1.05832e+06	1.82601e+06	895449	508795	1.96567e+06	588998
neg-5.137_266.22482	1.89197e+06	133480	138263	8.13727e+06	7.26743e+06	3.15316e+07	7.59257e+06	5.33568e+06	7.16499e+06	99056.5	456879	135516	246766	2.38091e+06	87819.3	272362	127687	105476	330843	171428	538200	2.69678e+06	220516	3.60086e+06	4.12728e+06	81849.8	310726	1.00501e+07	6.23207e+06	102739	371443	948381	443130	1.90773e+07	89124.8	113879	66800.2	144160	72627	2.72599e+07	761493	70592	7.48559e+06	383680	2.4844e+07	4.45558e+06	197263	415156	113077
neg-5.156_514.22713	132873	78612.6	74914.4	65618.5	77518.8	75416.4	53853.4	51659.3	61855.4	280069	340949	101130	47279.2	360198	48211.8	55020.1	95287.4	58850.2	374659	291316	332052	79368.5	149399	48777.6	71957.1	52698.2	2.26533e+07	69821.3	54224.7	76669.4	411961	68655.6	119656	63211.1	60726.7	59593.1	98873.8	85178	93789.7	68460.9	84660	50268.2	56486.1	191152	116112	86881.1	59777.3	313560	59145.6
neg-5.159_340.13158	121484	96437.3	219489	68145.4	2.3582e+06	2.44397e+06	55927.2	62441	864057	41520.8	337218	1.20688e+06	2.898e+06	374068	66707.1	2.62292e+06	98956.7	61116.4	4.16863e+06	315377	2.98935e+06	811348	155152	50656	74728	128470	1.68448e+06	117824	56312.8	2.88788e+06	427825	1.53381e+06	124263	65645.2	63065.2	93675.7	102681	2.82802e+06	97401.4	71097.2	87920.1	52204	83696.8	1.51519e+06	205302	90226.7	87429.1	240012	61423.2
neg-5.164_295.01707	112564	75645.1	63097.9	63141.6	74592.7	72569.7	62408.5	57856.1	56628.9	38472	312457	96194.8	48011.2	346601	47462	52943.3	84652.1	49000.3	360517	947615	375339	2.68537e+06	163207	105470	65478.4	50709	339073	3.2564e+07	53978.2	63940.8	623105	61361.6	115139	51170	51908.7	46931.6	165431	71937.8	90249.4	51241.3	74252.7	52094.3	54353.9	183936	190227	7.72783e+06	57520.9	171970	60805.5
neg-5.177_502.33017	1.06467e+06	8.7251e+06	1.13339e+06	1.97661e+07	1.15485e+07	4.01042e+06	3.56801e+06	3.63138e+06	1.1067e+07	3.49993e+06	701003	5.30477e+06	6.92781e+06	1.55072e+06	5.0558e+06	1.57268e+07	6.27954e+06	2.01988e+06	3.16055e+06	2.49573e+06	7.75825e+06	2.25906e+07	467179	2.70539e+07	6.82938e+06	8.58025e+06	1.42226e+07	675286	997624	2.92266e+07	806819	1.73634e+07	1.62061e+06	7.90585e+06	2.08944e+06	1.38395e+06	763391	3.56674e+06	651898	512123	8.69764e+06	4.96342e+06	4.09214e+06	6.41613e+06	2.00186e+06	5.20668e+06	4.09656e+06	3.36037e+06	1.25611e+07
neg-5.186_292.07405	101670	92941.9	70965.9	64708.8	317910	1.77511e+06	86169	91841.5	886281	48771.6	235665	73697.6	636764	302551	91133.4	1.12645e+07	111210	77415.9	378795	127322	2.04984e+06	1.74411e+06	343857	234392	66017.4	64154.6	349682	113803	62148.7	1.53178e+06	421380	1.59254e+06	146606	69261.4	83083.1	87333.9	215907	2.10793e+06	202631	65606.4	77417.4	63564.5	68141.6	6.88847e+06	347060	80999.5	63209.3	373604	86538.9
neg-5.187_456.32426	113035	103332	82029.7	557563	105829	151051	95801.7	116974	137962	57214.5	327429	95025	136612	336373	105365	140348	123642	146894	421140	145048	1.59066e+06	1.12508e+07	382296	67107.5	73397.4	71326.4	388772	126524	69096.2	259300	468486	483307	162994	77004	92370.9	123182	240043	135030	225282	72940.5	546677	70670.2	75759.1	206426	385858	90054.3	304296	8.27664e+06	96213
neg-5.194_740.43593	280449	241050	191357	167826	271575	847474	223484	250073	179241	130342	611212	235560	205399	687348	245793	182304	313757	200783	850344	338365	5.22119e+07	627158	1.03407e+06	157371	251144	166389	812844	295154	161827	316988	966567	171025	3.26161e+07	179634	302125	265606	596265	5.19804e+06	525535	182223	193886	164858	176729	5.32211e+07	900122	272247	542621	977548	224444
neg-5.222_400.19232	5.32899e+06	1.58586e+07	4.99436e+06	1.54654e+07	3.79451e+07	1.70789e+08	6.44415e+06	1.15367e+07	2.18425e+08	2.01666e+07	5.79792e+06	2.04367e+07	3.88542e+08	2.42655e+06	8.71483e+06	4.68918e+08	1.29308e+07	1.04651e+07	5.92241e+08	2.9766e+07	2.06086e+06	1.71537e+07	7.09347e+06	8.22646e+06	1.18192e+07	1.51045e+07	5.96735e+08	6.94339e+06	1.58944e+07	7.05416e+08	1.96292e+06	6.04473e+08	1.59631e+07	8.41654e+06	7.26258e+06	7.47791e+06	2.76772e+07	1.72295e+07	1.39762e+07	1.16008e+07	1.29078e+07	1.11136e+07	1.41566e+07	8.23185e+06	2.46884e+06	9.28002e+06	1.40214e+07	1.56761e+06	6.02513e+06
neg-5.241_350.08293	164187	129107	109098	108745	137035	9.48391e+06	98719	106189	201852	79903.9	3.591e+07	174368	5.27349e+07	206610	96853.3	402133	180960	97116.7	2.48111e+08	134050	852369	120844	572541	98142.6	113523	86864.3	189464196	191774	141807	849282	383607	438389	204998	95121.1	321534	163269	292487	121140	205009	136010	130604	113526	128673	121575	428505	111728	118132	612222	105291
neg-5.257_558.35976	183045	848103	553325	369661	9.72073e+06	8.18563e+06	1.03022e+06	1.22872e+06	9.73389e+06	613363	1.46199e+06	204768	6.54712e+06	647513	454378	1.03342e+07	282722	568480	6.18685e+06	1.98932e+06	1.04854e+06	316933	614224	786387	145354	646447	7.32385e+06	245544	1.66762e+06	1.05516e+07	395350	9.65143e+06	705012	139645	365877	185186	420464	1.2578e+07	220103	154050	800681	1.29412e+06	577759	369592	1.88018e+06	287725	719224	783881	930355
neg-5.28_326.15214	74531.9	61600.5	55996.5	47211.7	5.18006e+06	1.62933e+07	106804	69864.5	6.31892e+06	55381.2	741651	4.12989e+06	2.12567e+06	281372	39583.2	8.45417e+06	96780.3	53768.9	3.4613e+06	740331	8.34896e+07	2.97549e+07	131877	110540	56924.7	207343	1.0739e+06	89699	68348.2	3.70635e+07	99199.1	5.62657e+07	141763	65518.2	92498.4	46306.7	76593.7	1.52563e+07	47759.8	56408.7	55016.4	60839.5	602863	4.26462e+07	304692	66046.7	235722	220134	57708.1
neg-5.287_531.22917	77492.1	64047.1	339207	48829.5	88474.9	45472.6	48569.9	52546.2	138037	36971.7	63901.3	91066	51002.5	411965	316182	53915.1	208268	55904.4	145758	55153.3	299585	1.42246e+06	162427	50142.4	59185.6	41964	81223	93261.6	62423.1	60767.6	96906.3	83494.8	129240	6.12889e+06	1.20754e+06	48145.9	73027.5	185872	49656.6	188372	95544.5	85881.4	66906.5	166982	339557	69053.6	317422	228878	60000.1
neg-5.288_431.30397	278448	372025	9.15499e+06	478429	462833	200109	1.81835e+06	1.52482e+06	6.57675e+06	291961	188226	1.05063e+06	507344	3.4407e+06	2.11442e+06	489453	4.23e+06	2.16731e+06	3.58667e+06	181523	974999	2.03383e+07	1.22505e+06	513719	270156	712733	239249	846664	645873	381584	3.50406e+06	1.245e+06	449303	1.03296e+08	1.77145e+07	493312	1.71641e+06	4.79778e+06	144037	3.61217e+06	2.00222e+06	186003	2.23102e+06	1.88244e+06	1.00019e+06	1.40331e+06	4.72429e+06	1.39411e+07	389424
neg-5.29_430.30839	642211	5.31479e+06	5.63392e+06	868362	853677	578787	1.36968e+06	1.06758e+06	2.52418e+06	388751	1.0847e+06	1.16137e+06	156073	1.86718e+06	1.49972e+06	1.49271e+07	3.79522e+06	1.27514e+06	3.39504e+06	348980	528031	2.46441e+07	1.10707e+06	336909	521255	503526	446990	250576	337575	3.35842e+06	2.49923e+06	864186	311279	7.34103e+07	1.31289e+07	220763	1.26917e+06	3.83895e+06	361780	2.00279e+06	1.35212e+06	552875	1.18956e+06	1.67029e+07	379662	298328	3.69029e+06	1.00766e+07	514014
neg-5.29_432.30742	82278.3	184395	2.1433e+06	161406	196280	117130	344115	185236	754000	94986.6	378539	193186	217714	646182	534591	260619	1.48376e+06	536744	961843	77615.5	780937	6.34776e+06	293384	235796	310281	302540	184442	99021.8	119085	118992	636413	132479	137222	2.36922e+07	4.45118e+06	231439	385810	1.18665e+06	387650	646577	447748	389075	471151	303602	795327	271140	843167	3.03654e+06	1.55198e+06
neg-5.299_406.23956	1.2085e+06	3.25896e+06	1.4042e+06	95007.8	172146	2.40241e+06	1.37956e+06	1.8469e+06	91218	71935.9	124333	221235	2.73978e+06	569211	5.22094e+06	968355	713463	108773	330237	6.73488e+06	582904	1.35813e+06	266784	380088	4.19817e+06	468798	158036	1.07463e+06	1.83655e+06	324807	3.29993e+06	2.21375e+06	251463	2.46911e+06	660561	2.51074e+06	6.14964e+06	138797	885385	117359	106820	124386	130180	324898	792436	1.02017e+06	2.60439e+06	445328	1.94432e+06
neg-5.313_406.17864	137430	290409	64058.1	161963	1.71282e+06	2.94944e+06	48109.9	89479.5	627079	36693.5	1.51377e+06	123805	2.29497e+06	267147	126458	2.32986e+06	67389	60469.1	2.70038e+06	2.84856e+06	1.90133e+06	339323	126607	57475.9	64834	61050	2.90689e+06	79057.3	129745	3.72584e+06	103518	1.86616e+06	102122	69286.7	123901	148027	204093	971468	155863	80645.4	97701.1	66767	91295.4	1.86227e+06	374416	76387.1	82765.9	220986	60586.8
neg-5.345_324.13647	119784	208556	629010	250076	1.02266e+08	6.3678e+07	59634	191526	3.22271e+07	132197	5.14906e+07	3.13538e+06	8.23555e+07	386774	228943	8.72042e+07	335013	55015.1	1.29528e+08	2.65882e+06	3.6541e+08	2.29061e+07	122015	3.49893e+06	58997.7	150974	1.22962e+08	319140	579000	1.65644e+08	285844	8.20129e+07	163008	921687	273948	380542	229839	1.28199e+08	122537	1.07036e+07	282691	144368	2.77307e+06	1.40844e+08	607623	362738	202397	247027	95048.5
neg-5.347_484.97821	57811	69523.6	61752.2	52156.9	3.67696e+06	2.04204e+06	41223.2	43146.8	450587	38949.7	2.90913e+06	80926.5	2.28601e+06	167798	49914.2	2.85218e+06	67483.8	56516.5	4.69526e+06	69033.3	6.22109e+06	245799	89834.3	68881.4	60607.8	51837.2	3.8994e+06	67809.8	56488	1.05828e+06	101920	2.16703e+06	73899.9	59747.5	54174.3	50542.4	59979.2	3.61121e+06	96057.5	398715	64069.3	58561.1	107417	3.24643e+06	257524	60544	53865.7	76511.5	50875.5
neg-5.399_514.29663	1.40785e+07	1.3232e+08	1.149e+08	1.29703e+07	6.59027e+07	4.03701e+07	6.23904e+07	4.05188e+07	1.19364e+07	2.60936e+07	3.88682e+07	1.27219e+07	3.28027e+07	1.43216e+08	3.81214e+07	4.9075e+07	2.08973e+07	3.09226e+07	4.37134e+07	5.38633e+08	7.04389e+06	7.52142e+06	1.18575e+07	3.64691e+07	1.0065e+07	1.89638e+07	3.84293e+07	1.98434e+07	7.24257e+07	4.23086e+07	4.6092e+08	3.01066e+07	2.86325e+08	1.93316e+07	2.40385e+08	3.10439e+07	1.07782e+08	5.97562e+07	2.08774e+07	2.89548e+07	6.95369e+07	5.87667e+07	2.60926e+07	1.05969e+07	9.79821e+06	7.37184e+06	1.50825e+07	1.95534e+07	2.28455e+07
neg-5.411_488.35078	2.97307e+07	1.23453e+07	3.46832e+06	5.13863e+06	6.10052e+06	988992	3.34084e+06	2.89829e+06	6.02504e+06	3.14529e+06	3.59207e+06	5.60099e+06	8.39792e+07	1.12887e+07	5.89143e+06	8.06695e+06	8.76341e+06	2.14161e+06	3.02804e+06	3.76778e+06	4.41737e+06	5.24589e+07	7.878e+06	3.31373e+06	4.74126e+06	4.96887e+06	6.72962e+06	1.35003e+07	1.77827e+06	1.27147e+08	2.69229e+06	3.41013e+06	1.3225e+07	7.42931e+06	2.87477e+06	3.61126e+06	1.42774e+06	3.77764e+06	2.81771e+06	2.82753e+06	4.74095e+06	4.82704e+06	9.15189e+06	5.49592e+06	3.64649e+06	7.94218e+06	9.46053e+06	3.74846e+06	2.75175e+06
neg-5.417_646.40941	729741	370692	2.39503e+06	153352	1.62181e+06	6.80827e+06	442047	332636	1.33584e+06	193515	2.08579e+07	118066	8.18695e+06	877994	742690	6.4234e+06	556802	332986	4.28101e+06	145857	2.9649e+06	457687	2.09265e+06	365416	289606	216718	6.05087e+06	736961	193592	9.62325e+06	1.15016e+06	117768	454619	735062	690774	540586	126677	2.38675e+06	278867	389811	278869	136230	451383	3.39862e+07	176910	170998	299852	422937	103801
neg-5.419_406.10934	495325	128337	600072	59310.5	495881	1.58344e+06	299707	225782	83382.8	151678	1.8969e+06	87860.3	2.55222e+07	595954	504114	314141	444226	301098	1.68828e+06	124911	68133.4	83805.5	1.32772e+06	248033	167833	147101	2.55735e+06	500225	131404	88988.3	617252	79937.4	308581	683961	468875	366932	85984.4	377722	215919	749538	78181.6	189853	306384	2.17011e+07	140332	101653	114223	282080	70456.5
neg-5.433_528.27574	1.44705e+06	1.8271e+06	1.18713e+06	693408	1936130387	869609	2.20748e+06	549421	360909	481442	1.23737e+06	1.04325e+06	1.70801e+06	2.00644e+06	680809	1.03836e+06	582311	707155	629888	2.6692e+06	949546	1.08629e+06	1.38003e+06	842710	1.69192e+06	440607	2.45406e+06	669775	1.71675e+07	1.01761e+06	2.43667e+07	3.41532e+06	4.77274e+06	673816	1.01594e+06	2.29211e+07	1.92566e+06	1.84926e+06	3.97622e+06	357332	749707	240555	753694	122372	763070	1.04972e+06	1.27593e+06	429200	481408
neg-5.455_822.47833	176008	310518	146697	133544	456928	2.64009e+07	149400	84136.6	85071.5	245345	422009	110120	380434	371151	381122	470706	104290	269197	217035	334695	132845	226393	381572	89622.6	652754	802924	401616	379961	90653.5	103497	574157	87977.2	261038	1.30288e+06	122419	576087	93653.1	202677	445990	119161	101411	125775	92594.1	3.73508e+07	99058.5	267001	111783	82530.4	153860
neg-5.457_366.09941	270662	283150	154112	121774	455770	86150.9	254350	106828	81318.6	66525.6	482847	137544	346904	359502	428223	429219	101922	290114	211556	507822	121136	206440	470703	111767	595222	451054	389919	423930	126025	101436	523553	937971	238031	123615	160210	377002	141968	188192	406682	112114	1.85243e+07	120367	256760	90782.4	107872	243469	125820	78905.5	206814
neg-5.468_525.27693	5.5457e+06	2.59984e+06	1.57974e+06	1.37195e+06	1667835459	1.13399e+06	2.24538e+06	2.04242e+06	937371	707861	2.11246e+06	455388	2.48327e+06	5.43634e+06	2.88284e+06	2.82806e+06	843380	942080	4.19318e+06	698343	299911	471811	699623	1.12172e+06	1.08302e+06	660228	2.1152e+06	4.18808e+06	1.69205e+07	1.14543e+06	7.18441e+06	3.22604e+06	6.02608e+06	479271	2.2086e+06	2.47215e+07	2.92247e+06	2.89322e+06	2.66317e+06	1.50044e+06	904157	1.34308e+06	827597	421757	1.06172e+06	1.92549e+06	1.22001e+06	1.75392e+06	1.06604e+06
neg-5.498_310.21464	8.69635e+06	718701	3.41187e+06	1.56713e+06	4.71731e+06	1.33975e+07	1.17774e+06	3.85662e+06	4.46514e+06	5.86813e+06	1.05933e+06	800823	1.48603e+06	5.97217e+06	1.15089e+06	2.22199e+06	2.50308e+06	2.42897e+06	1.4644e+06	620391	557254	2.55707e+06	1.87958e+07	3.13995e+06	2.95323e+06	1.16113e+06	3.09041e+06	7.18818e+06	3.67086e+06	2.48596e+06	3.19352e+06	1.84863e+06	1.9942e+08	9.1038e+06	2.91284e+06	2.74942e+06	1.00146e+06	1.19752e+06	1.42617e+06	1.30728e+07	2.23821e+06	1.83911e+06	1.5908e+06	1.05653e+06	2.99081e+06	1.30961e+06	7.26732e+06	1.19885e+07	2.24527e+06
neg-5.5_371.14046	148671	871833	1.1053e+06	755885	8.62503e+06	2.12779e+06	1.11195e+06	724263	1.4236e+06	698707	3.33896e+06	887278	893914	1.18067e+06	632870	918737	726964	4.12888e+06	623594	1.48048e+07	536014	932772	2.63859e+06	2.19654e+06	808627	758832	639771	5.11075e+06	268856	707496	490638	1.05819e+06	1.23295e+06	1.06541e+06	3.18738e+07	3.91121e+06	2.1814e+07	1.10889e+06	588984	3.06605e+07	1.04729e+06	2.89756e+06	744997	833274	7.33646e+06	531202	795771	5.93081e+07	1.6359e+06
neg-5.515_466.23921	6.41025e+06	2.92002e+07	8.80317e+06	2.2459e+06	1.06197e+07	6.76242e+06	5.3402e+06	2.77176e+06	2.33147e+06	2.06005e+06	2.84625e+07	3.34001e+06	1.32078e+07	1.14362e+07	1.45285e+07	2.51646e+07	2.14932e+06	1.90075e+06	1.95168e+07	3.59636e+07	1.58037e+06	3.12411e+06	8.08849e+06	1.65525e+07	3.5354e+06	2.39742e+07	5.19551e+06	1.16375e+07	1.13007e+07	3.4507e+06	2.57411e+07	3.11994e+06	5.83414e+07	3.14122e+06	1.56784e+07	6.65917e+06	2.64542e+07	1.41634e+07	5.1605e+06	1.9106e+06	3.11202e+06	1.49275e+07	2.19653e+06	2.4568e+06	1.89254e+07	8.90752e+06	5.89718e+06	3.25613e+06	1.40191e+07
neg-5.516_400.25679	955146	392986	1.27555e+07	340722	2.12288e+06	57649.5	3.01067e+06	624872	389293	817064	2.46573e+06	399948	1.55272e+06	9.95364e+06	6.77661e+06	414129	6.03998e+06	519087	1.55885e+06	284914	320549	420455	4.0188e+06	422943	770133	7.48115e+06	2.33057e+06	2.40919e+06	182808	385596	4.98986e+06	476988	4.00462e+06	9.36583e+06	2.28372e+07	888604	274438	3.05413e+06	616532	6.93532e+06	472077	449665	993129	1.03873e+06	492064	868065	518489	328969	387004
neg-5.567_356.16272	46450	127496	100028	80501.5	476876	913052	59920	53904.8	294066	42472.2	30499.2	333826	62968.1	86464.7	52797.2	1.35106e+06	56325	50446.7	54033.3	78967.1	1.59197e+06	1.46271e+06	104775	54834.7	73254.8	69039.9	201605	83687.6	49113.3	2.04746e+06	68941.8	3.97585e+06	75627.7	56364.7	78221.3	61150.8	69573.8	1.17608e+06	61889.5	50420.9	66734.5	125090	44710.2	1.56361e+06	83959.5	63949.7	72189.2	48047.9	62444.9
neg-5.571_395.19017	50179.9	137734	108060	55704.7	457895	38532.9	64731.5	58233.3	58062.2	6.6245e+07	33498.3	71636.9	68024.4	73153.3	57036.7	67747.4	47673.5	54059.5	58372.1	61675.4	48422.7	65087.1	93071.3	59237.8	79137	74583.7	1.31038e+08	62607	53057	101297	74477.8	70764.4	81700.6	53945.4	84502.4	66061.1	61032.8	125608	66859.2	45004.2	61267.3	94610	48300.4	68323.6	90701.4	69084.8	77985.9	6.65538e+07	67459.2
neg-5.571_614.15313	57399.5	157550	123607	99477.9	73385.2	44076.8	74044.8	66611.7	66416	8.01961e+06	38317.9	81943.7	77811.4	106847	65242.9	123364	54532.5	62338.4	66770.5	70548.9	55389.5	74451.5	106462	67760.7	90522.9	85314.5	1.32701e+07	138842	62852.6	115872	85193.3	80945.7	93455.3	69651.4	96660.2	75565.7	85974.2	143680	76478.6	62306.5	82465.6	154577	55249.6	116957	103751	79024.4	89206.2	8.98694e+06	77164.9
neg-5.597_489.34581	1.08629e+06	330312	1.81379e+06	95563.3	627166	62002.9	105608	87377.6	77933.5	53543.5	617499	124076	61068.1	1.44991e+06	511020	86210.2	183456	97859.7	3.01019e+06	91965.9	66214.6	92258.5	1.13108e+06	317339	90025.1	113317	396220	3.21833e+06	74348	96045.3	1.56434e+07	87429	789136	314685	2.17788e+06	853785	68597.6	460941	102431	157528	121708	227937	71821.7	124454	77178.7	79474.7	103091	195079	67612.1
neg-5.6_528.34576	1.49733e+07	212093	6.60154e+06	199091	3.48763e+06	2.30205e+07	772952	2.97762e+06	1.01874e+07	3.67897e+06	5.2577e+06	252785	2.62429e+07	1.77634e+06	1.57086e+06	1.58378e+07	5.75538e+06	1.74638e+06	4.86633e+06	962381	422121	3.91065e+06	1.17976e+07	3.91632e+06	153257	320131	1.05805e+07	7.18647e+06	870441	1.29863e+07	1.02389e+07	801107	1.49834e+06	511935	2.54818e+06	2.24094e+06	119174	1.05495e+06	2.13335e+06	896711	107714	420012	689741	1.02498e+07	197797	1.1213e+06	638870	815519	343257
neg-5.609_726.32943	135301	311817	195408	193487	1.21782e+07	297864	158619	185192	1.28855e+07	101619	2.12756e+06	219173	2.50902e+06	202875	112930	2.00032e+06	146646	183604	1.85601e+06	172537	166739	178343	540958	152230	202976	113927	3.6115e+06	138884	132123	2.65036e+06	396252	238646	190433	141631	142023	280699	96453.4	253012	106931	145087	214989	190599	126868	149209	150146	155866	182104	124099	135480
neg-5.617_352.09524	65218	96568.1	84145.8	93265.1	170404	59597.6	76458.1	89266.8	87969.4	48982.6	38744.7	105646	89311.2	90119.2	54434.6	74149.5	48585.4	88125.2	94582.9	2.41105e+06	7.97333e+06	1.47045e+06	78105.3	62673.7	97839	54915.2	70057.5	66945	63686.3	88411.9	89752.3	73754.1	91792.8	68269.5	66733.4	135303	44946.3	3.70311e+06	51543.4	69935.4	103629	99160.5	61153.4	6.34995e+06	58545.7	75130.7	76291.7	59818.5	362577
neg-5.621_314.15238	335841	96877.2	84415.1	93563.6	965146	8.73957e+06	76702.8	89552.5	395730	49139.3	670737	105984	1.30746e+07	98103.4	54608.9	5.38085e+06	48740.9	88784.7	2.807e+07	83432.7	1.30936e+06	863387	76250.6	98373.8	98152.1	55091	6.73912e+06	80171.9	63890.2	3.91239e+06	92610.3	1.20922e+06	92086.6	68488	276321	135736	45090.1	615811	51708.3	70159.2	103961	66191.7	61349.1	1.16244e+07	68791.5	253773	76535.9	60009.9	65513.3
neg-5.642_490.10893	62343.8	77105.2	60333.5	70144.9	615216	3.02133e+06	64696.8	77015.5	439773	36885.1	1.38116e+06	62848.8	2.72322e+06	85109.1	41539.8	4.8969e+06	44220.3	81653.8	6.7633e+06	64600.4	1.78971e+07	884275	63469.7	68082.2	63593	46401	4.38104e+06	54078.4	57319.9	1.96053e+06	95873.3	4.1491e+06	82254.1	62471.1	57521.6	79051.5	33710.9	3.44606e+06	35287.8	45977.2	70675.8	65935.1	44733.1	6.82814e+06	63032.2	61580.4	65379.8	44458.6	55258.5
neg-5.651_591.28762	1.72197e+06	76983	3.22087e+06	72750.3	231593	54617.8	67822.7	80736.6	106591	37763.3	294644	65885.5	66628.2	1.85943e+06	489522	69863.9	126303	85599	1.12307e+07	63350.9	89534.3	54860.8	1.58137e+06	260770	66665.6	67544.8	273604	1.33214e+06	60089.4	90457.8	1.7268e+06	60550.8	86228.3	97175.2	231542	692376	34896.9	717302	36992.8	50161.5	60193	64145.1	44813.5	71622.6	66077.7	60844.3	68538.7	69942.6	47786.7
neg-5.651_596.16401	62085.6	73130.8	60083.6	69109.9	90965	51884.7	64428.8	67864.2	101257	162234	44743.8	62588.6	63294.1	80533.6	41367.7	66368	44037.2	81315.6	74013.8	60180.9	85054.1	52115.6	67802	67800.2	63329.6	41871.4	4.14731e+07	53854.5	57082.5	85931.3	95476.2	57520.9	81913.4	62212.4	52816.3	64332.7	33150.7	81409.7	35141.7	41047.1	57181	60935.3	42571	68038.6	62771.2	57799.7	65109	260148	45395.4
neg-5.652_491.36173	1.19528e+07	80741	2.0901e+07	76301.6	358867	57284	130187	329219	111795	62152	3.96036e+06	69101.7	69880.7	1.14234e+07	3.13278e+06	73274.4	1.31465e+06	89777.6	60850971	66443.5	93905	72140.4	1.21584e+07	1.76232e+06	69919.9	309301	2.82278e+06	1.06345e+07	139763	94873.6	1.00702e+07	63506.6	331816	1.29498e+06	3.10678e+06	5.02576e+06	36600.4	5.48319e+06	38798.6	876612	63131.4	291220	54019.7	448575	69303.3	63814.5	71884.4	156127	50119.4
neg-5.664_361.11206	63533.5	78966.3	58068.8	61358.6	84820.1	46759.2	55208.4	58228.1	95116.9	8.0638e+06	48314.1	55704.3	49162	86959.8	44668.7	68073.2	48549.9	69363.5	57583.9	59196.2	61517.6	56274.2	77408.8	53125.4	57161.5	42919.3	1.71298e+07	56082.9	48116.7	92788.3	103095	59132	77014.7	60456.5	50995	50438.2	32656.1	63294.8	37180.9	41818.7	61743.8	60359.9	45968	71079.2	54034.1	60280.7	61142.4	3.07399e+06	47405.6
neg-5.664_498.30198	1.17228e+07	2.7941e+07	1.57347e+07	2.47604e+07	4.09355e+07	1.62259e+07	2.38412e+07	3.38001e+07	3.10062e+07	6.73772e+06	1.91718e+07	8.08885e+07	3.38949e+07	2.71931e+07	1.32783e+07	3.20598e+07	1.57052e+07	5.83098e+06	2.59567e+07	2.80909e+07	165981929	1.5514e+07	5.66208e+06	2.31115e+07	1.53289e+07	9.27359e+06	2.49957e+07	6.37234e+06	2.26846e+07	2.8637e+07	7.78834e+08	9.08286e+06	3.47931e+08	9.78212e+06	3.73855e+07	1.66536e+07	1.60358e+07	1.6266e+07	1.10579e+07	1.10212e+07	2.40085e+07	1.2591e+07	8.23178e+06	2.4128e+07	2.14964e+07	1.21407e+07	2.51502e+07	1.93437e+07	1.38876e+07
neg-5.665_485.14131	65935.1	81951.3	60263.9	63678	88026.4	48526.8	57295.3	60429.2	98712.4	7.95639e+06	50140.4	57809.9	51020.4	90247	46357.2	70646.4	50385.2	71985.5	59760.6	62761.8	63843	58401.4	80334.9	55133.6	59322.3	44541.7	1.90145e+07	58202.8	49935.6	96295.8	106992	58717.5	79925.9	62741.9	52922.6	52344.8	33890.5	65687.4	38586.4	43399.5	64077.8	62641.5	47705.6	73766	56076.7	62559.3	63453.7	3.02456e+06	49197.5
neg-5.691_336.23064	1.30962e+06	2.36965e+06	1.8805e+06	3.5951e+06	1.41636e+06	683360	1.07858e+06	3.52012e+06	2.00068e+06	4.40792e+06	897596	6.81371e+06	607955	1.31465e+06	2.00259e+06	2.45225e+06	1.27098e+06	1.60451e+06	997543	3.51249e+06	1.08317e+06	2.12844e+06	352172	1.53568e+06	5.46707e+06	554117	999029	2.21035e+06	189146	2.30403e+06	777677	958059	740320	3.27056e+06	624086	1.64672e+06	1.3387e+06	1.36538e+06	1.16363e+06	1.40728e+06	3.04328e+06	3.65116e+06	894071	2.07468e+06	781967	1.49919e+06	3.56279e+06	3.21648e+06	2.31853e+06
neg-5.696_420.12509	114708	156380	88165.7	93692.6	1.06832e+07	1.37253e+06	98397.8	85120.5	551899	69831.3	9.1307e+06	105168	4.94904e+06	119768	79372.4	190048	290644	89230.1	7.33642e+06	207407	399741	100006	296235	89293.8	97227.7	79010.7	8.40438e+06	137069	82806.9	284009	269003	124258	130154	90482.9	103466	94414.4	61629.9	1.93775e+06	88501.9	95943	101469	84842.6	82655.9	1.93579e+07	95492.5	140541	116386	71577.1	76929.3
neg-5.728_368.29307	235147	307668	122483	346976	86760.5	55823.3	56614.8	885438	538158	1.04984e+06	94303.5	80898.8	132471	111106	145130	168488	197296	215422	96428.4	196188	50274.2	203868	178572	111583	295335	77789.7	153505	170901	84728.2	184284	151383	213475	78457.6	415367	171300	60916.8	106687	127362	221490	172409	437581	225745	97284.3	102116	81842.2	189403	269967	61287.1	150667
neg-5.748_470.14035	166459	174928	100777	110280	9.38056e+06	5.04867e+06	129928	118505	1.02113e+06	76622	6.42861e+06	136152	7.7109e+06	183447	137342	892034	115195	463583	2.17909e+07	182889	1.24258e+06	105061	293109	94825.5	131004	217654	1.28755e+07	120348	110448	834779	211195	108782	137032	136697	135242	119887	103322	1.61094e+06	140218	202903	119567	140535	90348.5	1.67559e+07	100555	159406	152134	69865.2	78489.4
neg-5.75_398.17667	590641	1.10059e+06	1.52091e+06	1.93638e+06	2.12595e+06	89722.3	261119	1.27188e+06	1.2183e+06	118466	5.3857e+06	177376	2.88384e+06	792146	5.66596e+06	8.7671e+06	1.3616e+07	505765	174423	760159	237201	625259	4.51363e+07	452975	250339	344787	1.2603e+06	2.91777e+06	382348	1.0082e+06	232720	508407	984774	184835	163042	3.91725e+07	118357	263969	9.62679e+06	8.14246e+06	185574	1.55709e+06	274503	253961	268028	257579	634926	2.05902e+07	212525
neg-5.751_420.08875	159366	167475	96482.8	105581	1.10176e+06	1.53334e+06	124392	113456	234902	73357.2	3.3067e+06	130351	3.15038e+06	175630	131490	114536	110286	443830	6.49746e+06	175097	101687	100584	280620	90785	125422	208380	3.17519e+06	138876	105742	301559	202197	104147	131194	130873	129479	114779	103863	231644	934381	194257	114472	134547	86498.8	4.68052e+06	96270.1	152614	145651	105943	75145
neg-5.759_438.26246	122517	1.10412e+06	75215.6	171599	92507.8	63514.2	327638	748873	433814	1.76217e+06	64153.1	1.47348e+06	81971.3	135020	101086	88052.4	84785.2	1.46616e+06	97961.1	167638	368156	926655	152521	450659	775531	160197	95109.7	88578	85724.3	1.25768e+06	126742	620532	141249	425610	99540.1	176266	79847.4	959180	105455	363858	769627	103436	66498	197123	74009.9	180619	1.59841e+06	51422	1.10655e+06
neg-5.779_492.38239	113206	324989	69499.7	772627	4.06064e+06	1.58001e+06	499432	258980	2.95455e+06	208567	2.37845e+06	128029	1.78596e+06	658183	287962	3.71473e+06	202384	508869	2.99763e+06	230856	456730	5.09878e+06	155314	260392	234957	148023	7.97175e+06	293429	134519	3.45459e+06	99154.6	3.368e+06	81949.3	274673	359024	299948	244434	669829	145257	123421	217541	151841	125195	724302	611968	149507	687680	388919	790925
neg-5.79_564.27646	250327	1.35587e+06	306868	396013	5.26221e+07	6.43159e+06	448250	178212	5.42868e+07	269452	8.43488e+06	375082	6.85341e+06	464820	206540	1.51877e+07	351202	1.03208e+06	1.42608e+07	1.15091e+06	633561	277884	1.12309e+06	341272	270677	404662	9.86237e+06	260388	443340	3.02987e+07	292266	2.20673e+07	747948	277075	320162	838285	503066	363858	210864	305133	307083	387733	319079	627432	450314	657305	957318	120833	237764
neg-5.797_474.33519	389959	89684.4	195870	151806	1.23347e+06	1.10724e+07	88045.9	385472	4.28363e+06	201717	1.15609e+07	726071	1.65667e+07	396548	82471.7	1.35275e+07	330213	228743	6.84739e+06	385608	448661	593433	145821	442675	167442	151035	3.26972e+06	282485	307389	1.39605e+07	102155	1.45901e+07	85103.5	180988	115382	197161	122368	169223	191785	120519	240112	178033	220356	62044.6	129663	466066	460283	185936	269744
neg-5.817_338.2463	1.38127e+06	2.04016e+06	2.23727e+06	1.04491e+07	1.75728e+06	570234	3.95676e+06	1.42144e+07	4.72864e+06	2.05034e+07	706453	973976	896424	752380	868208	7.19255e+06	1.24992e+06	4.78384e+06	1.22225e+06	3.44854e+06	860283	6.6169e+06	1.2546e+06	1.14844e+06	6.0941e+06	875147	968182	1.53667e+06	815987	1.47315e+06	1.13796e+06	4.24406e+06	1.10378e+06	8.82148e+06	794288	2.37593e+06	718415	880096	832263	757051	7.61714e+06	1.23796e+07	720938	3.8497e+06	1.37613e+06	1.33437e+06	2.01838e+06	1.39739e+06	5.35815e+06
neg-5.818_322.12091	67215.9	62883.1	58499.2	52377.1	5.93824e+06	1.32422e+07	58947.9	63575	3.57318e+06	38373.8	5.51252e+06	54742.5	1.03032e+07	109245	56818.8	9.91773e+06	63448.1	137795	1.54598e+07	659057	5.71659e+06	1.13722e+06	91640.3	51165.4	96038.7	102425	1.27831e+07	54123.6	50730.3	1.08051e+07	69635.6	9.94615e+06	67450	83096.5	87866.9	50362	50246.3	3.21607e+06	47787.1	82599.3	50998.1	87033.7	58844.1	5.98259e+06	229650	110363	58701.3	50774.8	35310.3
neg-5.849_520.28652	206330	722202	233778	121231	2.95046e+07	4.26347e+06	146071	119054	3.74644e+07	250599	1.34695e+07	1.31429e+06	8.33893e+06	194822	1.62203e+06	8.09401e+06	769717	265250	1.52022e+07	217955	474445	244062	206206	2.27784e+06	284173	185505	1.30531e+07	125438	298474	12405918	317304	7.25817e+06	519439	274877	307233	272831	195207	516185	95558.9	153885	115078	195807	164290	107893	223053	190471	148481	299540	243313
neg-5.854_582.34108	92138.1	2.14188e+06	104050	50039.9	104956	40714.7	170683	208561	53422.4	273313	52812.6	702202	40259	82665.6	99261.7	108525	42415.9	77123.6	180733	89443.9	118895	255339	134978	179492	596905	90950.3	52458.9	84078.4	59138.4	78316.1	7.62552e+06	454427	397543	155406	628681	39547.7	53625.3	866434	42661.2	45315.6	96698.8	972642	91051.2	292284	59622	81881.1	58133.1	46848.9	237312
neg-5.859_594.32365	162619	2.43615e+06	116255	122539	1.00401e+08	4.57851e+06	130702	349172	4.11089e+07	210740	7.15588e+06	196598	5.98635e+06	184685	128339	1.07027e+07	479186	202698	8.10765e+06	230399	263520	132033	198388	153282	210389	148376	7.64003e+06	132600	2.34741e+06	1.01428e+07	150636	1.49519e+07	549097	162521	148678	5.05305e+06	97698.8	287443	94554.3	144726	121648	187814	125192	984447	132146	286615	308836	153932	96100.3
neg-5.869_368.12618	758547	65879.8	78788.3	106364	1.41266e+08	514588	137474	95507.4	138552	120044	203305	50278.2	1.96247e+06	742063	54166.7	1.08279e+06	58295.7	53750.6	1.63494e+07	7.35974e+08	1219958813	1.9229e+08	8.26945e+06	1.52204e+06	327696	409181	502282	199436	552610	410303	77863.9	177881	701655	142564	70828	620883	80532.5	8.16301e+08	1.57826e+06	69573.8	187011	501065	61790.6	163713986	69528.5	107647	502889	234216	115901
neg-5.87_436.11354	72286.5	73058.9	52973.3	51911.2	552187	42237.3	42525.9	47869.2	52611.2	42212.5	52246.7	51531.2	42107.4	69470.3	60069.4	50398.7	47778.6	59608	54582.5	1.73078e+06	6.44762e+06	787819	92856.4	46938.7	59784.3	46948.2	55225.4	62064.1	64694.5	81244.8	67868.1	50527.2	257007	58333.5	51139.6	46782.8	37536.6	3.23867e+06	42006.3	46480	56412.1	78846.5	47182.5	862834	60113.7	55637.2	64698.8	50319.1	44845
neg-5.87_468.05175	54345.2	54925.8	39825.4	39027	248820	31694.4	31971	35988.2	39081.2	31735.5	31948.5	38741.3	31656.4	52227.9	45160.3	37889.9	35920.1	44813.4	41035.3	3.84058e+06	6.74218e+06	609375	68526.8	34870.5	41987.1	35295.8	41518.5	46659.9	48637.4	61080	51023.4	37986.5	193219	43855.3	36941.6	35171.4	26704	4.12249e+06	31580.4	34943.8	42410.7	51102.1	35471.9	759914	45193.6	41828.1	42945.6	37830	33714.6
neg-5.871_466.23915	1.02228e+06	3.78541e+06	672350	571254	1.54759e+06	1.14588e+06	801732	2.9066e+06	253805	79757	1.21815e+06	776910	1.61967e+06	1.50589e+06	1.07853e+06	1.46362e+06	503136	215975	741536	3.75584e+06	1.45608e+06	2.29265e+06	540470	1.5255e+06	2.14223e+06	707559	395069	1.18704e+06	2.35815e+06	746488	8.26012e+07	3.39393e+06	5.96784e+06	1.05866e+06	2.38069e+06	1.52837e+06	4.18172e+06	860641	907203	1.23181e+06	253653	3.13034e+06	305716	1.04496e+06	4.35704e+06	1.42516e+06	3.02553e+06	2.77784e+06	575438
neg-5.879_572.28137	54468.4	58848.7	39915.7	803104	3.04569e+06	7.70438e+06	32043.5	39035.7	3.02968e+06	205089	1.87144e+07	38672.1	6.24758e+06	43834.1	45262.7	8.43545e+06	36001.5	42516.8	235210	395469	2.02591e+07	8.89341e+06	69370.5	32562.6	45047.9	34917	377368	46765.7	48747.7	5.19687e+07	51139.1	201119	184653	39046.4	39064.4	93589	25115.8	1.58001e+07	51258	35023	42506.9	57854.7	33199.2	4.76313e+07	41916.8	48188.3	48751	175213	33892.8
neg-5.883_864.64952	102487	136106	75105.2	1.65285e+06	3.03578e+06	351051	65484.2	73449.5	1.81476e+06	139952	989784	103364	4.16018e+06	84112.1	85166.1	9.72787e+06	72180.5	84511.9	1.63651e+06	278086	1.25012e+06	3.75322e+06	130527	71508.6	84761.9	66562.9	842836	87994	101100	9.02017e+06	105758	1.97891e+06	347443	73469.4	73503.4	304291	50360	8.54137e+06	60086	65899	86836.3	108859	66895	1.05537e+07	78870.5	90670.8	176692	520011	72093.2
neg-5.884_286.12089	61109.1	66023.5	44782.2	48486.2	46993.6	762067	35950.2	43794.9	306557	34288.2	478596	43387	1.11793e+06	48174.1	50781.1	649585	40390.8	47700.4	3.26761e+06	91164.6	91746.9	46468.9	77828.1	40674.8	50540.1	39174.1	1.52182e+07	52467.3	54691	401725	56526.2	1.35049e+06	138990	43708.9	57591.3	39549	59513	94821.8	35826.8	39292.9	47689.2	64908.3	37246.8	48160.4	47027.3	54063.3	54694.6	42538.4	38025
neg-5.92_362.2675	218930	2.75263e+06	289611	2.97935e+06	110498	200954	649669	3.44163e+06	1.53387e+06	2.79012e+06	232416	3.25964e+06	306356	190238	165273	748313	319443	273185	127193	1.47211e+06	530318	3.0325e+06	232057	1.9024e+06	505799	57623.6	185644	122268	191082	200238	200281	2.99502e+06	345779	801058	340777	135837	5.74283e+06	2.31557e+06	112330	156099	573443	1.02192e+06	357588	773369	633810	248402	2.3853e+06	1.06446e+06	4.68677e+06
neg-5.931_472.35584	717503	3.05103e+06	122111	867334	9.71826e+07	2.1651e+06	216212	739064	1.2376e+08	287398	1.07527e+07	659173	6.51956e+06	595088	431901	1.58585e+07	1.90346e+06	263961	1.69468e+07	616902	6.03145e+06	856217	232191	617339	489608	211198	1.7915e+07	211478	2.99857e+06	2.49111e+07	231275	9.36123e+06	307420	339404	166240	3.87469e+06	134906	515811	132793	343864	909925	333354	150813	2060183	1.21201e+06	427638	582521	598838	297410
neg-5.946_484.35561	61629	80003.6	43489.1	78410.4	280626	4.21019e+06	49757.4	69968.9	5.53617e+06	42752.1	3.46805e+06	98379.9	4.15882e+06	53553.4	32996.4	1.44433e+06	43738.5	57823.6	3.20668e+06	58574.2	50194.1	52978.3	83586.7	41976.2	78421.6	38032.8	2.34244e+06	47326.5	60431	4.93443e+06	83256.8	1.12299e+06	74259.2	40620.7	40928	85533.7	30499	59404.5	35679.7	43072.5	85711.6	55492.2	39578.4	58488.4	53234.8	50374.1	53792.4	49860.8	55876
neg-5.97_300.20927	55474.8	69261.2	45391.6	78084.2	1.03314e+06	2.42479e+07	51646.6	68558.4	1.80829e+06	38446.4	2.61791e+06	72786.2	2.29719e+07	64899.7	35748.6	2.1446e+07	51889.8	60956.9	4.65147e+06	59329.4	7.64982e+06	1.96443e+06	78512.8	129678	50102.6	44598.2	5.31908e+06	48607.7	55838.6	1.49269e+07	91315.3	5.28379e+06	72040.4	41919.2	39319.8	111630	32163.2	2.67808e+06	40073.1	38280.3	111850	58353.7	40134.8	3.73754e+07	48394.9	48016.4	52553.4	44633.7	45092.1
neg-5.978_594.32361	223678	3.07304e+06	131562	201797	1.57825e+08	5.18749e+06	408498	530409	7.33859e+07	110026	6.45737e+06	283326	7.50221e+06	158835	87490.9	8.60489e+06	1.00651e+06	162625	1.59238e+07	166154	129179	136345	192151	135536	201826	119859	8.92861e+06	121799	9.32161e+06	1.95599e+07	232993	1.37948e+07	191113	114021	105332	8.10873e+06	88181.3	211749	98074.5	110851	220587	146911	101859	143227	186861	127439	347993	396584	143802
neg-5.993_316.20424	131426	158547	147468	144358	361537	1.20489e+07	238230	156938	803416	88008.5	1.28527e+06	146185	1.77958e+07	148563	84331.5	1.6627e+07	212948	154210	4.87604e+06	153599	1.75176e+06	639324	179725	146737	134460	114256	5.2073e+06	111269	136597	9.85096e+06	217925	4.28876e+06	143318	109075	102954	252372	127083	1.73463e+06	91732.1	89582.7	180898	146801	131157	1.96354e+07	108182	113066	243308	102172	146134
neg-6.01_404.09357	122131	157969	137038	129039	1.3575e+06	2.75622e+06	135579	123641	159721	81398.8	9.89907e+06	126561	1.31203e+07	126765	85193.4	121348	95129.1	143303	3.32172e+07	140111	287601	113246	164209	88612.8	147561	131888	1.3586e+07	103399	133251	154731	202512	150202	114978	101360	108461	107208	82339.6	1.88439e+06	82605.1	156800	162775	148906	88507.7	2.29737e+06	107481	105069	115550	93120.4	106208
neg-6.011_322.12091	54513.6	65648.7	63681.4	48800.1	5.52385e+06	7.21034e+06	63003.5	54711.7	2.73882e+06	37825.9	3.92645e+06	171437	7.84983e+06	58907.6	36417	9.27741e+06	41223.4	66592.9	1.22314e+07	195253	1.27343e+07	762220	76307.6	116858	58064	49339.3	1.20257e+07	45690.8	58987.1	1.01418e+07	80360.7	1.02294e+07	65142.4	57479.4	44458.9	49729.6	35616.9	3.99498e+06	36795.2	441567	71668	63393.5	130192	2.96444e+06	110223	96025.5	53095.7	36468.9	49354.6
neg-6.013_517.31581	1.60298e+07	3.20428e+07	3.67738e+07	3.01745e+07	2.73361e+07	1.75344e+07	3.03214e+07	2.51874e+07	9.11131e+06	1.90571e+07	2.09434e+07	1.23419e+06	2.46071e+07	4.08305e+07	1.67888e+07	1.89773e+07	1.7352e+07	3.51972e+06	3.83457e+07	6.19727e+07	6.65886e+06	5.39208e+06	3.15336e+07	3.55544e+07	1.86332e+06	783526	1.76057e+07	1.68606e+07	2.35173e+07	1.4521e+07	8.635e+08	1.35295e+07	4.32171e+07	1.83909e+07	4.97589e+07	3.05106e+07	2.17023e+07	2.14845e+07	1.2507e+07	1.22937e+07	1.073e+07	9.73984e+06	9.5428e+06	3.52714e+07	1.09766e+07	2.52995e+07	3.77316e+07	3.20612e+07	2.55765e+07
neg-6.027_280.20417	52377.8	485162	68386.7	64395	47947.9	43182.8	67658.6	625507	296916	598985	114014	414525	37369	63260.1	42514.4	50782.2	45943.2	282926	65865.8	69920.1	3.76152e+06	649894	81945.8	226226	73637.9	65816.7	49778.7	50530.6	66496.6	862813	80311	1.46902e+06	56914.6	2.20098e+06	54125.9	86948	41090.3	113759	41222.8	40581.4	268076	74309.2	41152.6	118793	53636.5	52433.1	212709	46470.3	368815
neg-6.031_386.24647	514824	196327	143468	180381	92050.4	155385	407916	128348	103220	46765.8	131525	1.29028e+06	43108.2	176247	93822.3	1.52457e+06	801643	86287.6	571635	80658.4	132510	1.38733e+06	120280	86620.4	668942	1.98486e+06	2.64807e+06	108973	433972	454259	102057	125782	69432.9	233889	109273	62624.1	280296	131230	192502	280852	165726	611463	61602	229354	266753	255629	69161.2	169641	170320
neg-6.051_486.37162	50681.3	66348.4	54663.1	59156.7	310797	6.59203e+06	54831.5	48627.3	9.53974e+06	34367.3	5.25948e+06	66014.9	6.10751e+06	62557.7	39220.2	5.40014e+06	41852.3	50418.3	6.92049e+06	66277.4	45555.3	57078.1	63022	1.45916e+06	67521.7	54043.3	8.36751e+06	48104.6	63032.2	8.30841e+06	113365	1.67214e+06	59760.7	46797.8	51306	45284.5	35527.9	85608.7	37783.7	38467.2	71165.9	64279.7	40607.7	59213.1	50842.1	49920.4	51869.8	42925.2	48443.6
neg-6.06_456.32465	74669.2	268396	75210.4	1.79179e+07	580721	456584	192492	446468	624038	150869	200709	1.22803e+07	227524	95792.4	229602	634134	1.14933e+06	117557	237532	104664	665582	4.94236e+06	262496	46698.6	2.11136e+06	47172.4	162532	117974	211666	371538	131863	757039	86030.5	1.26482e+06	300614	506928	109069	83998.7	44952	288196	460997	319604	714151	613189	2.03505e+06	122113	3.32162e+06	338913	48737.6
neg-6.087_292.20414	1.10714e+06	1.81081e+06	287973	4.93694e+06	471646	3.81053e+06	155209	1.75767e+06	1.10113e+06	462720	277942	526327	477717	322856	988997	3.72065e+06	433609	443245	633596	2.89358e+06	283083	1.77323e+06	675382	578379	466194	3.48543e+06	322147	135453	411157	3.01461e+06	347104	2.43041e+06	221137	787237	2.41344e+06	4.74084e+06	4.69398e+06	471192	218521	2.76499e+06	1.12852e+07	1.47617e+06	1.79489e+06	232928	204622	2.84368e+06	1.98313e+07	1.13165e+06	1.58091e+06
neg-6.089_582.28704	867966	3.20519e+06	1.59013e+06	632810	3.52671e+07	4.0532e+06	349056	827617	3.64719e+07	441361	6.00674e+06	1.25818e+06	5.47674e+06	865286	655162	9.45097e+06	371637	377929	8.62218e+06	1.45867e+06	1.2928e+07	1.46244e+06	667746	327531	1.25264e+06	245031	7.72518e+06	188529	666468	1.85708e+07	1.18728e+07	2.08122e+07	5.51541e+06	643990	901533	731844	394104	727576	505784	914935	910777	840597	769172	866250	327100	1.27617e+06	2.47414e+06	430374	846446
neg-6.111_299.18898	61183.8	60124.4	43588.3	53448.2	215953	1.51968e+06	36899.2	65059	178002	36783	661018	54813.8	1.58511e+06	50514.8	34827.7	1.0576e+06	49383.8	47179.3	2.03123e+06	72314.8	564225	108309	76632.9	41578.1	49140.3	37976.4	1.40997e+06	48251.5	50487.5	1.33664e+06	228606	1.37165e+06	61696.6	42190.9	40996.3	37256.1	35340.3	153647	32748.6	37853.1	64301.5	48805	36295.2	350710	46311.3	53625.5	54470.6	41571.7	54773.6
neg-6.113_528.30834	4.9615e+07	716408	2.06637e+06	115605	2.03875e+07	115716	3.10827e+06	6.89109e+06	2.28333e+06	1.56441e+06	3.58347e+06	339078	9.87697e+06	7.30954e+06	9.10026e+06	383451	1.74403e+07	1.18881e+07	2.10525e+06	1.47771e+06	323841	965918	8.09333e+07	4.88463e+06	1.33208e+06	3.10516e+06	1.28659e+08	1.54975e+07	803802	942465	4.62046e+07	272597	1.60347e+06	1.43296e+06	9.27064e+06	4.69331e+06	3.88502e+06	1.17542e+07	3.08459e+06	2.10167e+06	343219	1.08779e+06	1.19921e+06	556054	590736	718841	1.43795e+06	439057	59145.8
neg-6.172_324.26678	129634	1.81299e+07	293292	2.32432e+07	89451.2	79383.5	3.07886e+06	3.99477e+07	1.77683e+07	3.8496e+07	75088	3.13395e+06	78997.4	118766	75705.2	3.5256e+06	215911	5.67409e+06	72591.4	410905	1.00888e+06	6.69071e+06	74039.8	322035	1.53387e+07	186761	68799.5	103444	67537.7	462946	258209	1.72708e+06	135123	5.7455e+07	974306	284278	79255.4	104810	61295.1	68492.9	1.10467e+08	1.64762e+07	77782.1	8.74325e+06	99274.9	284572	115254	268340	3.58295e+06
neg-6.174_620.30041	596554	351245	109841	303732	4.28781e+06	911879	246497	375424	2.26784e+06	201552	4.0796e+06	419065	613419	272024	152992	2.22706e+06	152971	146453	839788	397843	1.3671e+06	2.84164e+06	163383	140415	292699	171853	844964	228269	127219	2.50026e+07	776812	9.91749e+06	362852	151352	213897	150100	174892	9.11132e+06	135259	122639	410669	283700	256877	2.54394e+06	210962	187529	360256	792555	322182
neg-6.175_338.15236	102014	125259	39170.8	108315	4.17965e+07	7.6673e+07	69526.6	112897	2.95419e+07	71876.3	4.59359e+07	149445	7.70253e+07	93461.6	54559.1	5.87515e+07	60831.1	52227.3	8.34198e+07	1.63598e+06	2.52483e+08	1.53957e+07	58264.6	50074.1	104381	61285.2	5.93743e+07	81404	45305.3	7.28376e+07	203194	4.95185e+07	97442.9	53974.5	61914.7	77960.7	62369	5.6447e+07	48235.4	42779.8	146450	68486.6	61209.6	5.08554e+07	75232	62954.5	76520.5	211167	101487
neg-6.178_376.19279	489333	378646	171492	1.64689e+06	217783	228970	424658	2.73873e+06	1.72296e+06	2.10832e+06	178622	1.08395e+06	249027	288840	283632	460658	348299	416778	440902	2.2784e+06	280824	732128	524793	151369	887557	284576	225182	246076	382827	613037	837410	596973	394808	2.24777e+06	208820	1.19422e+06	637266	242429	261770	167887	634088	924289	232994	1.02271e+06	282614	203341	231314	821297	876605
neg-6.196_450.17131	111484	137069	112320	118528	80098.2	344299	79437.1	123541	97684.1	78653	59720	163535	224321	106154	179310	63726.3	89440.1	57151.4	62613.2	155253	71133.9	158501	63689.8	54795.2	116520	453153	53083.1	89079	78130.8	184092	303141	188831	78173.3	55967.2	83470.8	58574.6	68249.3	87759.1	100123	47858.3	7.62905e+06	74943.8	272000	170431	66271.7	73180.7	100869	309285	146660
neg-6.196_978.59325	98678.1	1.09271e+06	459143	92925.8	2.80703e+06	54487	519665	109350	86463.5	578193	52860.1	796123	392336	93960.3	918963	77816	52838.2	757605	55421	598066	1.42289e+06	140295	93039	464504	1.50068e+06	2.37462e+06	46985.6	878524	43942.9	180680	268320	142718	69193.8	1.60376e+06	278662	51846.4	60409.8	77678.5	2.61717e+06	625396	141850	1.07878e+06	59286.8	1.51881e+06	58659.3	64774.7	366152	273758	98298.5
neg-6.214_488.3509	1.20483e+06	752933	260083	539639	4.09418e+06	3.18482e+07	1.22385e+06	230819	1.51757e+07	170314	5.01503e+07	931403	6.60154e+07	471032	763774	4.50878e+07	1.02306e+06	585359	2.9836e+07	1.07641e+06	1.29701e+06	1.01114e+06	887728	705102	1.24587e+06	488305	1.59308e+07	1.26439e+06	1.01344e+06	6.47524e+07	352926	5.53653e+07	208856	354891	511921	1.02293e+06	1.01162e+06	380242	700905	252125	1.29639e+06	83787	233590	892327	3.52093e+06	1.92895e+06	1.17967e+06	374474	664323
neg-6.227_272.17801	56372.4	80496.6	39577.7	46115.4	4.34814e+06	1.13216e+07	52855	46607.6	539726	30826.2	7.19301e+06	45637.6	1.87482e+07	87391	39489.2	1.22851e+07	50128	37630.6	7.75437e+06	117386	385249	874284	61972.8	43217.4	42639.7	40476.1	8.09049e+06	45466.2	46199.1	1.04885e+07	315431	4.63346e+06	105189	34724.5	78889.1	34979.7	32945.3	6.87414e+06	48332	35072.3	51359	39136.2	35210.4	4.905e+06	37026.9	49497.6	53445.8	266972	40955.7
neg-6.236_367.27259	1.13723e+06	92307.1	1.01144e+06	74667	1.51355e+06	43639.5	254312	147420	50036.1	226166	734908	46522.6	1.3094e+06	411541	458255	360212	507890	470383	737381	334281	60034.2	45778	2.20827e+06	1.98477e+06	93728.8	78211.9	1.55128e+06	1.58168e+06	345924	302097	722873	80504.8	158642	187854	1.10285e+06	1.83795e+06	48312.4	960518	264155	383606	48214.9	101228	459040	243790	48120.4	645307	255265	290906	44627.5
neg-6.237_346.14533	141529	177888	87461.8	202449	143565	9.80795e+06	122787	210202	101476	74058.7	602578	248757	160806	210257	87266.3	109636	668193	105456	523843	281522	186872	149559	144317	101823	103716	92250.2	114257	113423	120796	224503	697063	148443	299444	89082.7	174930	233149	1.45746e+06	138662	153543	1.03657e+06	113497	242376	80123.3	494420	85692.7	115356	341761	1.06038e+06	99670.4
neg-6.257_566.29192	208388	1.03527e+06	640539	740237	5.59735e+07	2.22073e+06	2.64708e+06	1.43543e+06	1.14051e+07	531402	1.48183e+06	760240	348486	670907	481488	737008	1.09191e+06	400323	2.86426e+07	344944	541436	780005	388957	373617	519812	322412	5.07656e+06	257106	4.38484e+07	1.10058e+07	854100	4.49434e+06	550961	406046	214339	1.25634e+07	950239	1.05001e+06	321388	102852	526120	438394	270639	605805	734088	338074	1.09462e+06	722886	248120
neg-6.293_396.1815	5.93392e+06	1.72784e+06	1.60995e+06	1.19318e+06	3.06302e+06	1.44306e+06	1.45918e+06	2.27997e+06	1.75345e+06	5.60381e+06	1.19657e+06	729603	2.12193e+06	3.66662e+06	2.7967e+06	1.54746e+06	4.81707e+06	3.99941e+06	968975	591012	690918	1.69087e+06	1.21778e+06	3.58975e+06	184902	2.47512e+06	2.35908e+06	1.07728e+06	2.21148e+06	1.56796e+06	417189	1.70971e+06	1.15432e+08	650073	1.64516e+06	3.41796e+06	3.42656e+06	1.45211e+06	1.59406e+06	964118	1.22806e+06	3.74958e+06	1.35487e+06	1.57559e+06	933166	617737	2.1632e+06	4.45206e+06	1.77737e+06
neg-6.321_472.38814	70637.2	123845	76593.7	53180.4	96234.4	50223.8	96907.4	63397.4	54794.4	81834.8	57223.7	106372	45262.7	284582	49350.5	46917.7	55569.9	135453	85518.3	227437	292399	53544.4	173203	56966.3	50651.5	83088.7	278349	72731.5	106053	141318	1.22879e+06	120392	149939	107591	239190	69895.3	78062.2	76528.5	711086	57093.6	69830.9	95033.3	58420.8	227267	82171.3	65314.8	62776.6	241711	72710.2
neg-6.365_314.18868	48208.5	99338.6	55353.4	43845.4	620186	2.29405e+07	86941.2	65700.8	1.64489e+06	33087.1	3.05261e+06	59765.1	2.63287e+07	186352	27505.7	1.96675e+07	32963.9	38640.5	4.93527e+06	88123.5	7.52448e+06	1.19779e+06	57670.9	92923.5	46762.9	40754.8	5.87761e+06	41600.6	40420.1	1.48101e+07	150673	5.68252e+06	54182	42882.3	114154	32950.3	62911	2.54005e+06	167765	31373.1	46695.7	38739.3	41091.7	3.30684e+07	48998.1	48802.6	52991.8	120000	39759.3
neg-6.386_616.23813	1.98823e+06	2.06363e+07	1.03802e+07	1.29104e+06	2.07313e+07	1.91462e+06	7.54017e+06	2.42439e+06	473116	829605	2.38044e+06	165153	1.47783e+06	4.49764e+07	2.7441e+06	1.29472e+06	1.53728e+06	7.44068e+06	7.51843e+06	2.14217e+06	445856	133739	2.90116e+06	4.56886e+06	129223	273222	1.76257e+06	2.10524e+06	4.45926e+06	174214	2.88082e+07	964589	644061	2.83509e+06	5.70629e+07	2.60533e+06	6.28326e+06	318611	2.65847e+06	5.01761e+06	385458	1.98809e+06	2.2057e+06	449617	4.32321e+06	828650	806539	443608	1.47078e+06
neg-6.393_324.2664	311688	89604.6	55256.1	220286	98342.4	91068.8	798346	222401	276717	298463	975193	130246	53530.7	204613	72648.8	132023	52207.5	373093	358687	139429	346563	95938.4	540716	141648	212489	196231	102561	142564	327743	147171	187526	425158	5.14509e+06	108710	367514	284278	190150	112665	161274	48516.7	374864	177979	148384	106940	99463.2	114533	338809	128191	139048
neg-6.402_472.35551	432499	1.70371e+06	272259	2.3114e+06	1.32772e+06	64856084	1.30345e+06	1.37038e+06	2.72033e+07	358742	9.08239e+07	986246	115292119	1.12492e+06	875284	7.77154e+07	811028	1.0774e+06	4.93843e+07	1.37413e+06	2.04408e+06	3.11847e+06	456972	7.42239e+06	1.67273e+06	798349	2.6159e+07	118373	459134	1.16633e+08	1.01442e+06	1.03549e+08	278772	191302	498826	1.26185e+06	416991	609928	465636	343784	918691	400259	1.04595e+06	1.0398e+06	8.09868e+06	787850	1.6686e+06	519203	949923
neg-6.446_474.3715	1.38438e+06	2.36516e+06	1.61752e+06	1.61628e+06	1.01681e+07	8.70057e+06	1.03782e+06	412350	7.78645e+06	1.21993e+06	1.38401e+07	501655	1.13278e+07	1.25546e+06	1.16185e+06	1.13443e+07	1.59056e+06	800725	1.52039e+07	4.1537e+06	441771	1.36657e+06	1.16568e+06	947574	796097	843616	2.53619e+07	1.77839e+06	1.63874e+06	7.5685e+06	1.43658e+06	1.27553e+07	517902	1.30633e+06	1.0729e+06	999280	317864	596754	1.47329e+06	796695	725289	480826	1.92357e+06	1.26964e+06	785745	1.61577e+06	1.34942e+06	1.89919e+06	589066
neg-6.463_318.21968	53256.7	503768	1.3873e+06	54013.5	98050.2	53222	95242.6	1.04704e+06	1.18841e+06	456211	205385	455808	71875.1	80912.7	552343	172132	246891	496970	80776.8	402916	3.41116e+06	1.03454e+06	157057	1.323e+06	245834	78502	58467.2	140335	46402.7	1.36918e+06	503236	2.74389e+06	79062.8	7.86208e+06	141043	122262	830613	167742	70231.8	41995.1	1.97972e+06	173633	35027.9	370175	109015	83040	1.77276e+06	172695	444643
neg-6.478_388.16816	48529	63128.5	53015.3	43131.7	1.92163e+07	3.87663e+07	43416.9	52155.9	8.78511e+06	35053.5	2.44162e+07	51112.8	4.13058e+07	70424.6	29808.1	3.46723e+07	57960.7	59411.7	5.40594e+07	45093.4	3.16908e+07	3.60299e+06	70701.1	35960.9	59581	51005.9	4.7233e+07	47456.5	42500	4.49632e+07	79968.4	3.8169e+07	33388.2	44377.6	78119.2	36543.9	75509.4	6.57404e+06	58137.8	41961.6	57617	45181.3	35664.7	1.56949e+07	88288.8	90418.5	42664.8	51713.1	36578.5
neg-6.49_654.38391	693676	68568.1	82150.9	44314.5	240585	38978.8	44607.5	204899	44950	50924.8	129832	133716	131194	420331	171253	82312.3	333840	201866	261874	63324	97692	42511.1	153533	37227	118027	51662.7	261802	344523	60065.4	474234	82161.4	76732.6	216228	91163.2	117638	289373	77140.5	123908	55485	297286	77134.7	80874.8	37796.9	42675.6	86598.7	1.05511e+06	81989.2	218626	207021
neg-6.5_392.1996	643313	66288.6	66697.6	209770	655427	1.13164e+06	40678.6	47051	277545	36468.9	686909	54705.6	1.63945e+06	53326.6	33285.3	1.37873e+06	58947.9	51014.6	1.95621e+06	3.72022e+07	5.92487e+06	175496	70101.2	38991.4	214376	49945.2	2.20639e+06	126060	48549.5	1.94711e+06	76262.2	2.2528e+06	79642.4	42759.8	69076.7	38001.6	65251.9	615991	52954.6	103618	90895.3	132543	42607.1	1.05524e+06	76509.3	90733.8	41063.6	45683.7	43077.2
neg-6.585_322.25111	289421	6.65378e+06	225973	265329	565912	262811	545302	6.03014e+07	1.58737e+07	8.30809e+07	184097	1.70191e+07	209955	360842	271249	240624	754311	6.30802e+07	311764	755508	5.5928e+07	1.65084e+06	437785	5.20346e+07	386354	338931	212650	404369	281340	1.00668e+07	104947	1.85684e+07	936564	6.9879e+07	207774	262375	186505	260122	463034	170813	4.80908e+06	255188	157316	8.06199e+06	250979	288358	188330	593194	1.30364e+06
neg-6.585_422.17676	67287	518800	127420	202955	57198.9	86837.5	210757	2.60303e+06	436929	3.11455e+06	46343.2	614993	102202	124027	119861	183159	124431	2.31988e+06	73463.5	170982	3.0892e+06	253041	89972.2	1.39652e+06	186817	165593	48153.5	55541.4	55411.8	227240	81888.9	633055	95016.4	2.84847e+06	130501	92912.1	82142.7	202970	61984.6	85204.1	297028	144985	101733	198107	181429	225003	146952	108384	181082
neg-6.623_586.26046	42648.4	1.08427e+06	93724.2	198228	3.00548e+07	393709	82088.2	425840	4.43725e+07	96676.8	1.06918e+06	200632	836985	56501.5	47368.3	3.02126e+06	394999	52125	422554	112881	54921.6	130329	61344.7	129991	76182.2	88002.3	1.17708e+06	40525.1	682125	3.12844e+06	46343.9	5.12473e+06	33911.6	121289	38270	791627	58966.1	111902	59110	38759.9	95849.9	157047	40453.9	120038	91658.6	168396	85368.4	150190	94374.7
neg-6.626_346.21493	47663.6	107173	62696.7	113128	63547.7	43555.2	91741.4	136755	118928	67022.2	42495.7	147846	57141.2	63145.8	86487.1	76322.3	334272	58254.6	32731.7	105395	61380.2	195474	68558.5	61011.3	85140.9	115923	44681	45290.7	45417.5	133819	51793.8	131827	37899.5	95897.1	42770.4	434437	845693	125061	64782.9	43317.9	107121	103019	45211.1	131476	102437	89998.5	95407.4	59560.8	88659.5
neg-6.626_486.33504	516353	1.55079e+07	265458	477176	3.81409e+08	6.97718e+06	1.79248e+06	4.74069e+06	4.26957e+08	442785	3.04487e+07	6.41136e+06	8.14429e+06	181730	339049	3.02661e+07	4.7945e+06	329149	1.25151e+07	725531	838734	712169	456274	701931	1.98074e+06	489086	31471147	109776	1.76124e+07	5.47624e+07	244765	6.12729e+07	71391	1.0501e+06	270797	1.58623e+07	249280	401110	512512	319137	1.50557e+06	409703	420405	816939	510398	1.37564e+06	809702	1.37922e+06	562601
neg-6.628_584.26643	43280.3	1.07011e+06	95113	201166	3.36605e+07	393609	87549	353758	4.83246e+07	60858.6	1.13521e+06	171227	836985	57338.7	38762.2	2.44081e+06	342533	52897.4	422554	95702.8	55735.5	183177	62253.7	124744	77311.1	89306.3	1.17708e+06	41125.6	682125	3.22756e+06	239488	5.36588e+06	34414.1	73909.3	51849.6	791627	59839.9	113560	59110	78747.4	97270.2	159374	41053.4	119385	93016.9	121533	133982	139058	94374.7
neg-6.655_458.34037	310535	151758	132637	632085	9.03878e+06	892451	158266	244874	1.54092e+07	237847	202801	457028	695788	190936	170565	1.14485e+06	168729	189823	683376	190258	200842	130945	124930	194821	120921	159226	854631	109264	274264	788444	147328	2.53509e+06	325793	121959	122355	185629	162948	151597	73193.4	157704	193525	175051	148397	175651	263000	122644	151861	146032	85797.5
neg-6.656_440.32979	147073	71874.4	62818.5	63240.1	8.0501e+06	814483	74956.9	63765	7.1796e+06	112647	82598.8	79980.3	186865	90429.9	55293.6	499026	79912.1	64819.2	604717	90108.7	95121.3	62017.1	59168.6	92269.7	57269.6	75411.7	714286	51748.7	121833	204181	69776.5	432715	154300	52272.4	57948.7	66399.8	77174.3	71798.1	34665.3	60694.4	91655.8	82906.4	63761.4	83190.3	80230.5	62449.4	53045.7	69162.4	40634.8
neg-6.673_472.35582	410129	792827	226114	425092	156008042	742135	580891	2.39583e+06	1.07025e+08	331015	1.85198e+06	1.04552e+06	428877	722592	223268	4.63126e+06	418640	146074	2.31888e+06	522382	929174	609263	141646	493716	625134	226054	9.02575e+06	145744	1.26324e+07	1.01673e+07	326789	1.31464e+07	447875	323614	211931	1.14733e+06	425570	318072	143713	151690	318678	273433	214792	200907	1.00939e+06	254327	348115	313349	224420
neg-6.674_586.37251	322022	169670	147432	137591	143245	117141	185390	195635	154087	231172	114155	122666	116960	288954	169757	110311	206982	190068	123407	200490	237849	268504	184128	191618	103590	415233	170123	140928	378656	318296	173439	150349	539461	139108	161147	190001	205970	151985	238817	164026	286855	194183	146154	190580	8.06426e+07	610788	291757	162486	246859
neg-6.697_552.27502	201528	279207	99300.6	3.17245e+06	2.0306e+07	593244	121270	670681	1.51866e+07	2.40576e+06	621317	3.37015e+06	182384	189014	1.10659e+06	1.1257e+06	135394	124470	392773	635540	836932	1.69659e+06	150414	173029	252293	273360	111283	80643.3	1.17859e+06	1.33613e+06	113452	3.1819e+06	352879	284934	119670	359239	196963	99418.1	219613	159369	3.16584e+06	212226	382841	110228	275316	93842.9	724584	282377	2.31325e+06
neg-6.708_566.32843	579351	305255	206653	247541	2.51294e+06	3.2446e+06	333536	351968	7.44296e+06	415902	1.1791e+07	220688	3.80529e+06	519857	305411	3.98794e+06	372383	316543	6.59117e+06	360702	427915	305815	206319	344741	186369	605376	3.06986e+06	208428	461731	3.11427e+06	312034	4.62308e+06	970547	250269	289919	341831	370562	273436	168118	295100	376111	349355	262946	334590	290260	258102	241157	292329	173239
neg-6.719_323.20985	165144	119162	1.54254e+06	259481	2.36586e+06	103490	1.81427e+06	157844	889560	73206.5	225461	90749.3	161359	2.86548e+06	262824	477703	336609	4.89639e+06	2.65461e+06	60760	85376.5	59478.3	593591	888194	47188.8	732320	236938	168751	167956	128607	2.54584e+06	741451	130299	967898	2.35534e+06	244325	2.06826e+06	1.89288e+06	269556	42313.8	198358	694049	227280	1.90092e+06	1.12988e+06	521631	108721	667691	36871.4
neg-6.798_545.28914	277742	177277	49862.1	3.04008e+06	60526.8	31581.2	84684.1	1.38916e+06	1.51249e+06	134106	47045.3	4.33246e+06	49921.8	49595.9	92606.1	565082	392647	538071	56353.2	111746	368029	118916	83308.7	58679.6	2.35095e+06	43108.2	56733.1	63364.4	535730	71808.3	75962.1	3.14353e+06	550067	78267.3	103104	3.23921e+06	28656.6	72108.7	35417.4	36156.7	1.38724e+06	755313	93304.6	58961.7	3.84895e+06	598650	124777	3.68725e+06	31291.7
neg-6.897_402.07804	199304	165703	139438	131655	129583	434697	117702	144601	139475	134458	1.03767e+07	157584	1.85072e+07	127058	122244	174676	153825	118661	1.1357e+07	159375	152870	154208	202246	168035	156533	127375	4.60517e+06	152953	173842	215779	145257	159707	157733	128146	106001	144411	116729	281850	95811.1	103350	214923	143571	120555	118326	124934	165680	197567	103975	109276
neg-6.916_574.42404	67506.1	116106	47321.9	286852	38873.7	46820.8	57222.3	60363.7	93407.2	46145	49953	198663	37935.1	43605.2	41953.2	68851.3	52791.8	191697	42966.9	87125.3	52463.8	52922.9	66253.4	57668.5	116734	43714.2	47473.2	52492.5	124750	74053.7	41600.3	80207.3	98153.8	54223.3	36378.8	49560.8	30007	38961.7	32881.7	35468.9	131363	85224.6	86711.8	40608.5	290078	86062	67803.7	53694.4	66925
neg-6.942_962.59901	48533.4	462777	43364	37149.1	430991	30472.1	59711.1	46865.2	39108.5	108665	45775.1	193244	131984	34003	259825	31151.1	35744.8	125357	33632.3	105991	1.61186e+06	43784.2	63604.2	51993.7	103892	642290	34653	59887.4	40554.4	149747	45404	34955.9	38131.4	236085	52803.6	29700.7	31433.8	33337.2	354615	184549	84146.1	92879.4	32462.3	788238	38764.6	43398.6	98715.4	279449	60466.7
neg-6.944_632.39386	81291.7	76840.5	297400	42487.3	4.49447e+07	51582	35836.6	78264.1	1.9306e+07	42013.6	4.262e+06	75883.3	2.52996e+06	71892.5	48758.3	2.42825e+06	1.54553e+06	71889.9	2.71868e+07	50315.2	44683	50075.9	114654	59465.2	47683.2	37174.2	7.23272e+06	305843	1.12244e+06	368100	297713	95547.4	43610.8	38195.4	100993	1.45665e+06	159469	114322	66102.2	42523.6	51571.2	46108.9	51470.7	59442.8	44335	337672	71061.1	73848.5	68613.4
neg-6.945_558.3682	100219	52231.4	49064.9	47770.5	44703.8	33426.6	48555.9	39863.4	42900.3	139040	50213.3	63551.8	31696	37299.9	42171.8	62777.8	53557	37667.6	36893.2	48259	38826.8	48029.4	69771.1	57035	42966.2	35655	38012.9	52766	44486.4	1.12695e+06	49806.3	38345.2	41828.6	65366.5	31962.5	47859.3	154511	36569.5	32973.6	32209.8	49463.6	42787	35609.8	52779.2	38672.5	87410.8	68157	61917.6	35050
neg-6.962_726.3142	156159	130835	104894	101366	111198	87786.3	93710.3	96138.4	115459	97405.4	142288	127018	93448.7	388031	115961	119891	128948	91115.9	169368	113731	82701	119471	876718	143003	118529	97093.5	117508	98885.7	107862	443194	145872	129623	98688.9	134848	79505.1	79924.2	102741	90207.4	82718.5	96587.1	123773	102520	88577.4	91773.3	97710.6	132835	140309	89223	87821.2
neg-6.975_320.2353	602338	1.27283e+06	446441	6.50379e+06	864103	6.67995e+06	285484	8.36976e+06	2.77178e+06	1.44626e+06	3.3276e+06	3.32567e+06	817652	354689	2.75102e+06	4.56201e+06	981108	440601	421291	4.01141e+06	3.64596e+06	3.35929e+06	254603	858303	3.29611e+06	5.90935e+06	931858	213087	402157	1.20598e+07	351104	2.34498e+07	171380	1.31865e+06	699805	9.21234e+06	3.97925e+06	1.19468e+06	225379	2.26818e+06	4.54821e+07	2.27801e+06	2.15875e+06	307802	372847	3.12504e+06	1.68918e+07	867565	3.56934e+06
neg-6.986_342.11653	54666.7	65354.4	627664	147741	57598.4	109508	97278.6	92257.7	235888	48137.2	34702.7	85102.6	76864.1	39749.1	34621.2	87006.6	43146.7	68053.6	465296	67049.5	55016.6	178745	64593	81759.8	238263	42700.2	43255.2	137009	309473	170453	97624.6	581757	34799.4	59651	62670.7	44977.3	65067.7	522578	37976.3	43436.1	286010	193530	51345.9	71546.5	319404	48533.5	46712.4	176845	177297
neg-7.01_572.40838	198584	103503	49841.4	1.85021e+06	40826.6	67511.3	42331.2	918546	397391	246677	59682.4	359910	38981.6	49891	47360.1	128966	179596	1.94407e+06	49148.5	78862	118944	62057.7	69387.1	114882	234719	93297.9	41977	49054.7	181773	89589.5	53258.4	719406	293096	62753.3	68370.7	221195	55381.5	55391.8	57986	63689.8	668116	1.06119e+06	124666	76512.9	2.48293e+06	418216	126757	138032	42761.5
neg-7.04_688.36837	297594	349331	40346.6	162218	605161	182669	441439	104154	264549	65719.9	2.87027e+06	578444	1.43411e+06	110158	1.28485e+06	1.53358e+06	1.92096e+06	135220	41915.6	130878	1.08871e+06	70178.6	504405	735454	162076	71076.6	461733	497723	90273.5	1.37881e+06	65483.2	100344	1.67665e+06	385575	827612	1.77023e+06	2.88821e+06	120166	148090	72957.6	245633	1.1335e+06	292137	493819	59810	439410	471864	138583	86553.4
neg-7.073_428.29339	165964	330133	79034.7	525593	103572	358586	239576	203891	113934	142417	103077	3.05551e+06	37767.8	86307.2	65425.3	292342	1.20326e+06	51977	1.01253e+06	365249	260990	617248	61895.9	175443	1.22078e+06	946885	932877	129048	648823	390922	170965	379613	58667.5	172935	48073.2	70564.3	227930	69792.9	253922	48315	257822	363674	190498	255917	185655	124505	132946	62996.3	399003
neg-7.078_632.39389	406452	46648.1	86825.6	38178.1	7.25195e+07	70329.2	33096.5	48350.8	1.9503e+07	34385.7	5.2921e+06	50623.2	4.32611e+06	123747	56403.4	3.86699e+06	2.63341e+06	98051.3	7.34168e+07	100753	42145.1	43002.8	68973.8	73649.1	40362.4	32445.7	9.22325e+06	134004	1.10219e+06	327334	40171	60430.5	53495.2	82733.2	43834.9	2.88396e+06	29812.7	35904.5	47159	63802.5	42633.8	45502.6	33417.3	32497.8	41660.9	140167	47390.7	36996.2	48824.5
neg-7.101_671.37394	153967	57550.6	41943.2	91133.2	43794	37637.7	37640.1	50282.7	50761.6	67507	40366.3	59501	48640.2	142306	56399.9	56754	127086	51233.8	86050	44021.1	183827	49694.4	235377	78406.3	44876	144416	123023	95255.6	91392.7	233205	83380.7	152436	38276.4	42935	35462.1	147280	66013.4	47510	56066.8	77785.7	45502.4	50348.5	64813.8	37934.4	102863	137848	95226	100196	36883.1
neg-7.102_654.38426	368037	52445.1	126138	61736.7	194880	34298.7	356570	1.02639e+06	704851	107180	464240	62560.4	747686	1.07151e+06	246284	110869	634799	234879	624950	117614	78572.7	45285.9	3.14848e+06	179749	49351	1.01129e+06	869921	489995	348205	3.18302e+06	389590	56696.1	175772	152772	364178	688354	610880	258263	325438	396868	41465.7	769555	323837	164516	87741.5	194198	59572.8	61593	33611.1
neg-7.103_608.37847	1.07606e+06	474339	257784	228440	554313	141268	499983	1.13898e+06	888383	215725	673728	231659	862814	938195	300062	424836	826557	376958	847619	340179	253181	358307	3.72834e+06	402646	236411	1.18998e+06	1.1059e+06	614054	531522	3.79119e+06	448915	229328	333582	329651	401099	859085	732195	422485	504052	428057	191708	1.02386e+06	462072	347749	212672	1.11343e+06	392238	339328	249400
neg-7.105_794.31084	45558.4	45043.4	32827.9	29614.3	50579.4	923930	29460	27672.5	149333	29884.2	554516	46569.9	1.71548e+06	32902	26532.4	1.1175e+06	32998.4	27722.3	5.05733e+06	34454.2	30813.6	38894.6	48637	61366.7	35123.4	29143.4	1.94674e+07	33593.6	27569.4	2.04321e+06	41955.2	2.189e+06	28092	33604.2	27755.3	27096	27938.9	29915.9	27758.7	31162.4	34301.9	32936.5	30824	29690.3	30226.9	44985.9	32941.2	26199.4	26247.2
neg-7.166_327.27795	82900.4	50782.8	117600	121587	54994.4	133267	392554	71637.3	632108	99957.4	284300	275628	604313	115936	251626	102929	127395	54819.3	95869	133139	127875	262158	91189.8	66549.9	239005	288426	69255.6	46865.1	301840	1.1802e+06	122426	59270.6	181881	42875.8	307444	335109	3.6001e+06	152564	48578.8	119327	124060	129649	228229	138210	76651.2	75916.2	116290	70791.9	715118
neg-7.18_918.66048	33848.7	35513.7	25044.9	293684	24469.2	53428.1	32413.2	243047	671591	39924	21821.7	2.9135e+06	21318.1	24847.6	21461.8	255109	26262	21296.2	26894.9	29220	45695.2	42733.3	41246.3	48235.8	768524	27534.2	27109.6	29356.6	214740	32624.2	26268	2.00625e+06	22353.4	50077.6	23848.9	147634	19498.6	26539.2	21782	21012.9	135262	121220	116926	20007.9	3.25035e+06	191813	37974.3	228907	24275
neg-7.184_656.46651	46496.3	93803	34403	113331	33925.4	60602.7	44524.4	189313	66216.6	83263	32435	79980.5	29283.6	34132	29481.1	43900	36074.8	29253.6	36944.1	238782	90112.5	140925	56658	66259.1	76771.6	37822.3	37239.1	40325.7	54033.5	44814.3	36083	149260	30705.8	62599.7	32760	32968.5	26841	36455.6	29920.8	28864.4	78780.3	37681.7	63439.3	28044.2	51212.4	48815.6	58771.5	29915.9	33345.4
neg-7.32_962.59827	51399.3	1.38401e+06	132155	68212.8	2.84722e+06	233724	356728	122107	170064	1.12538e+06	53442.1	1.16994e+06	493270	49860.1	1.63669e+06	160668	42061.1	1.29957e+06	32805.8	1.07035e+06	8.15609e+06	215700	62369.2	441341	766660	2.35811e+06	33245.3	141011	49074.4	866028	44070.2	37357.5	48075.7	1.32917e+06	97636	35602.5	104492	49649.1	1.46726e+06	1.36739e+06	611553	557685	96872.4	2.6596e+06	214011	71198.3	859888	1.22536e+06	516196
neg-7.342_534.36783	70979.3	52752.1	62602.8	66932	62887.1	51660	326917	173402	140288	388396	47958.2	161714	44802.9	89960.6	49892.1	75193	148590	122597	36444.9	271702	125106	111338	92615	219940	203873	139625	35752.1	83915.1	103355	2.76594e+06	89657.1	84772	49780.1	184075	51895.4	44945.7	202925	104689	69667	61959.8	91809.2	69258.8	116518	38900.3	156164	106622	89150.9	90188.9	112833
neg-7.344_532.24964	66027.2	133490	58235.1	111211	465968	83714.9	304109	927122	200244	2.08709e+06	57357.7	264166	41677.1	99629.2	495312	124826	78214.8	959765	33902.2	2.98535e+06	177151	151295	86153.4	1.40897e+06	189649	277713	33257.8	38769.2	285062	593326	83401.9	78857.6	46307.1	171233	48274.8	91113.4	188768	97385.5	1.02414e+06	279728	245483	451887	117059	123537	2.06997e+06	284756	1.27141e+06	436113	614679
neg-7.524_472.31957	50996.1	78497.9	47246	56432.6	4.05513e+06	106630	32796.7	32830.8	3.74439e+06	35319.7	252568	78695.4	106227	40670.9	30197.4	289420	31438.4	33074.4	97014.2	51306.6	33274.8	34963.2	76947.4	46859.2	57794.2	38678	109721	46010.3	46399.7	150401	46191.6	151455	34390.9	40148.7	97651.4	39000.7	28974.7	43928.3	34673	32368.8	67538.5	43128.2	34858.6	28990.1	33401.7	47680.2	38844	30412.3	31360
neg-7.562_560.38374	120939	41848.4	39406.3	47774.3	33353.8	37129.4	69682.4	83545.1	50368.5	417529	39170.4	86329.5	28860.9	44662.5	37705.3	69396.9	36179.8	38099.6	41491.7	44690	40290.8	42238.5	71460.3	55566.3	76967.5	35367.8	43043.9	45382.8	48010.3	585530	45593.3	41298.8	38138.9	45143.6	34097	33260.1	30028.8	35723.4	34368	33948.7	46882.3	44021.9	37782	64382.3	37546.5	96806.2	74739.5	44537.4	33926.1
neg-7.598_528.38219	60361.8	103170	162121	57740.9	290062	1.01715e+07	77313	78794.8	1.17016e+07	51142.5	7.66904e+06	66928.8	1.05643e+07	75609.8	88926.3	3.16439e+06	45046.4	35133.3	1.26946e+07	187484	88856.5	146199	67852.3	82450.3	57138.3	68574.4	4.40659e+06	153623	65469.2	1.06372e+07	217655	3.90361e+06	32755.4	129023	103333	154659	168581	85481.2	72653.5	59688.2	212590	71567.4	51492.6	29981.6	51477.8	194894	106738	35885.3	29556.5
neg-7.62_776.18142	58133.7	34105.9	42215.3	38689.8	30997.7	40641.6	31233.5	38288.3	42605.8	37938.2	36172.7	53762.6	34635.7	54724.1	36377.4	32496.6	36377.2	39747.3	78850.8	46761.5	38923.2	187543	78324.2	55201.1	41601.6	60819.5	37475.4	43355.7	1.43047e+06	46099	48318.3	44531.9	30865.5	43347.4	40022	37783	30428.2	35182.1	31328.9	29370.2	43384.2	2.96589e+06	288350	32669.5	64192.2	48722	38210.5	33473.7	32863.7
neg-7.635_560.3836	101627	65411.3	49507.7	110819	38007.6	49132.6	49003.4	160417	66157.2	531448	40824.8	56286.6	40618.7	64177.3	42644.1	34009.2	42661.1	46613.4	62688.8	61447.9	42042.7	47028.2	91103.4	64736.8	93350.4	41016.3	46997.4	50845.1	56045.9	1.88156e+06	56250	52224.6	39449.8	47730.1	43126.9	38358.7	35684.5	40878.1	79551.2	34312	50878.5	60219.9	43517.6	52925.2	51390.8	58038.2	62213.3	40282.2	41277.9
neg-7.711_518.36133	110900	36280.3	44843.2	38693.2	55355	2.3187e+06	47368	44006.5	1.1829e+06	39920.8	3.8662e+06	45619.8	5.33027e+06	69309.4	35359.7	3.61937e+06	43924.4	41446.6	2.6854e+06	40662.5	40322.7	146140	83147.2	60177	55618.8	48005.8	1.28437e+06	48547.5	45399.1	5.33064e+06	58580.4	4.19287e+06	41895.1	74998.6	40399.8	31474.5	35260.6	35285.4	37253.8	79010.3	45462.4	45936	39094.1	44968.2	49511.8	53414.7	40159.6	35269.2	37599.8
neg-7.817_514.4246	49621	115375	204216	226589	77951.9	143903	156477	149138	124975	147556	35528.5	563497	62664.6	56734.8	111175	409540	192953	77481.8	161514	134818	91608.2	642307	81259.1	191819	102711	129710	136835	38339.8	295017	392669	45556.5	974192	36780.6	109524	245861	65182.5	103415	179039	138521	161977	448024	150109	621227	49217.4	125645	57279.9	454859	65623.6	335194
neg-7.853_619.39607	207805	69771.1	82519.9	68160.9	311763	61161.4	58782.6	63616.1	56086	450575	501680	87755.2	89569.3	210519	124366	68676.6	100916	159383	153864	91821.9	475000	1.74457e+06	246416	342243	89680.5	155298	256945	172238	1.27817e+06	94223.7	147807	790399	111970	151922	306474	424601	123831	116707	334461	283186	77485.6	63777.6	4.63003e+06	114720	241450	237351	83067.3	66523.8	63347.1
neg-7.854_618.39267	101476	47912.8	66006.6	59916.7	58525.3	53763.8	85854.4	55921.6	49302.3	1.11908e+06	54367	70332.3	47435.4	63614.3	60178.5	46390.2	61994.3	156024	616979	103004	1.91736e+06	6.70071e+06	117116	137264	78833.4	159932	55497.3	58245.5	3.6289e+06	217835	64375.2	2901401	78589.3	299251	56930.5	155785	43986.7	50060.4	52846.6	51472.7	68113.6	83220.6	1.59585e+07	42184.2	336080	67467.7	45654.5	42942	55685.2
neg-7.887_429.32509	149733	75835.5	191842	50113.6	145849	634681	101973	304046	72754.5	144077	158931	38078.4	772498	4.71951e+06	1.96985e+06	236054	101270	517291	601279	108941	69632.3	53988.1	192177	417206	40106.5	744159	81483.7	58525.6	140053	562452	148260	61657.3	921176	60460.8	2.68069e+06	225817	74032.6	81970.4	69611.7	99826.4	43497	91460.3	64461	353672	54533.5	145829	160987	182295	41179.5
neg-8.096_428.18754	523219	220199	991070	66772.3	1.05485e+06	2.25987e+06	3.88497e+06	1.39127e+06	203309	1.7664e+06	409684	59394.3	6.92678e+06	7.38676e+07	1.88048e+07	2.08078e+06	945438	2.25043e+07	1.62796e+07	8.42417e+06	6.99966e+06	191570	2.78757e+06	5.24135e+06	149877	1.06547e+07	1.88004e+06	2.8117e+06	2.4827e+06	1.36036e+07	1.17486e+07	172967	1.2768e+07	5.54119e+06	2.58952e+07	2.37397e+06	1.99932e+06	1.56233e+06	1.10479e+06	842753	395830	248822	423007	1.8403e+06	904825	1.23593e+06	334944	1.32947e+06	722807
neg-8.096_430.18166	523219	32603.6	982975	66772.3	1.03529e+06	2.19185e+06	3.82122e+06	1.79323e+06	203309	1.69724e+06	340893	36253.7	6.69144e+06	6.90804e+07	1.81687e+07	2.02758e+06	609131	2.33146e+07	1.4082e+07	8.66536e+06	141881	191570	3.56538e+06	4.88915e+06	142218	1.0094e+07	1.88075e+06	2.65185e+06	2.30777e+06	1.2991e+07	1.38752e+07	165879	1.18834e+07	5.40798e+06	2.70862e+07	437927	1.34789e+06	1.50643e+06	1.06378e+06	741427	70010.7	333814	416700	2.15608e+06	905068	1.23593e+06	334944	1.14021e+06	739980
neg-8.102_330.25635	103871	49171.9	97815.7	48938.7	209387	206762	385262	199746	79271.6	108067	61570.3	54677	734741	3.44679e+06	1.71545e+06	476133	249677	415513	1.91379e+06	1.96259e+06	47318.9	63737.1	195885	327170	71396.6	1.02166e+06	72274.5	448867	118257	2.61409e+06	1.37925e+06	62930.1	2.49667e+06	692277	2.96222e+06	65058.8	1.37676e+06	210660	95628.6	101184	52416.9	68261.2	75643.9	158896	244782	376487	64997.5	56561.9	119904
neg-8.14_798.16039	58659.4	41023.1	59384	89294.5	48462.5	76533.9	40652.6	321413	601780	312400	56572.2	87928	49993.7	54770.7	38515.3	49434.1	40989	63887.3	58174.8	59984.4	53873.7	1.01357e+06	125928	116266	57023.5	651923	66499.9	100894	530077	48559.4	73151.2	57836.7	54689.9	55247.3	56312.7	46300.3	73471.5	50176.9	47406.2	38330.6	60392.7	6.03716e+06	1.83657e+06	68194.7	482481	67520.3	181767	215174	43848.4
neg-8.143_760.1867	185383	129647	187673	200785	153158	346078	128476	1.19261e+06	1.64353e+06	943525	178787	492972	157997	173094	124960	205734	129539	201905	183852	206930	170259	4.88371e+06	397975	270422	333233	1.81174e+06	210162	333245	3.19815e+06	153464	231182	163526	187018	174600	177967	146324	491031	158576	152289	121138	328549	2.66701e+07	8.69662e+06	185290	1.78782e+06	213387	608169	839785	182732
neg-8.144_806.19228	50913.1	35605.8	51542	44469.1	42062.8	53605.2	35284.2	428192	624969	300165	49101.5	152553	43391.8	47538	36307.8	44348.1	35576.2	55450.6	50492.5	68110.5	46759.4	1.74864e+06	109299	57503.7	206398	574170	57718.3	91521.4	1.13708e+06	42146.9	63491.2	41582.7	47467.8	47951.6	48876.3	40186.1	185378	43550.8	41145.9	33268.9	78738	1.16803e+07	3.60848e+06	45664.4	645319	58603.9	143271	252391	60317
neg-8.146_762.18471	50411.8	34044.2	51034.5	42229.9	41648.6	39485.5	34936.8	143022	104167	86298.7	48618	138958	42964.5	47069.8	33100	30373.5	35225.8	54904.6	49995.3	38096.7	46298.9	759453	108222	56937.4	30894	219178	57149.9	90620.2	420108	41731.9	62865.9	41173.2	47000.4	47479.4	48395	39790.4	98233	43121.9	40740.7	32941.3	58133.7	2.79166e+06	955644	45214.7	179527	58026.8	51466	142039	37683.2
neg-8.148_672.38915	53396.6	36059.9	54056.1	33733.5	8.32541e+06	93082.3	37005.3	42914.6	1.32061e+07	46074.9	2.64349e+06	53670.6	1.51593e+06	49856.8	35059.8	2.07735e+06	378474	58155.4	2.18991e+07	40352.3	49040.2	40075	114630	60308.6	32723.2	40973.9	4.59616e+06	95985.6	52122.8	101706	66588.1	43611	49783.2	50290.5	51260.4	87596.9	37294.4	45675.1	44994.6	34891.7	45628.7	43221.3	35337.3	47891.8	34360.6	61462.5	34990.7	36962.5	39914.3
neg-8.149_808.18922	57627.5	38917.2	58339.4	39994.6	47610	45137.3	39937.5	216699	335254	167493	55577	93241.5	49114.3	53807.3	41096	50196.7	40267.9	62763.4	57151.4	43549.7	52926	923350	123713	65087.2	106111	335253	65330.1	103591	638816	47705.2	71864.3	54463.1	65141.2	54275.4	55322.1	45485.8	87659.5	49294.2	48559.8	37656.4	89121.9	6.35047e+06	1.99684e+06	51686.6	343972	66332.6	84036.9	97776.4	68271.6
neg-8.212_562.39914	58371.3	34372.4	43902.6	48102.5	41340.9	39489.8	38479.8	37397.4	53734.1	71172.8	48555.2	50721.7	32123.5	56552.9	31296.3	52558.4	35973.2	51609.9	35791	33061.2	37223.7	36725	108470	52466.5	38208.1	37023.8	44083.7	75949.4	32962.7	134258	45602	45499.9	51878.6	45519.4	42278.8	31621.8	27768.1	39162.9	43437.1	31844.7	49824.5	37224.7	39319.8	39071.2	56208.9	55261.6	32264	32945.1	34336.9
neg-8.217_675.40804	68923.6	48943.8	51839.3	56798.4	2.86062e+07	95461.8	35261.1	69882.2	2.88505e+07	55217	3.38913e+06	68765.2	1.32738e+06	67746.4	63276.4	1.74123e+06	659935	399432	9.37437e+06	39037.9	83064.5	46788.2	4.63157e+06	141150	34924.9	85201.4	4.56679e+06	443497	1.04091e+06	1.51438e+06	87213.1	108130	61257.1	75679.6	135591	1.49203e+06	32788	41963.7	87017.4	38406.6	143219	43954.1	46428	46134.5	39416.5	66884.6	41890.4	40004.8	40544.2
neg-8.222_774.32972	65701.4	36843.5	49415.8	54143.1	1.73238e+07	45110.4	33612.6	42093.7	2.14418e+07	48697	1.2551e+06	61155.6	513606	51894.2	35226.4	656504	225901	58090.9	3.4706e+06	34976.4	42282.7	44600.9	122092	59055.1	33292.1	41673.2	1.74983e+06	79899.7	343147	823033	51328.6	73141.7	58393.4	51235.6	47588.1	451345	30788.9	40001.9	42591.8	36611.1	62083.8	60514.2	39529.3	43977.7	37573.8	63757.7	36637.8	38134.6	39160.6
neg-8.223_674.4045	62966.3	125404	47358.7	51889.1	8.42944e+07	164619	32213.4	115995	8.14823e+07	46669.8	9.68917e+06	58609.7	4.00297e+06	49733.9	33760	5.01953e+06	2.13115e+06	55672.6	2.75647e+07	33520.4	40522.5	42744.2	117009	56596.7	31906.2	39938.4	1.1056e+07	76573.6	3.4535e+06	5.55759e+06	49191.8	298399	52955	49102.7	45607	3.53784e+06	29507.2	38336.7	40818.7	35087	59499.3	38235.8	37883.7	42146.9	36009.7	61103.6	35112.5	36547.1	37530.4
neg-8.367_774.32974	113555	84276.1	116941	82008.3	2.37705e+07	72498.2	110337	119730	1.70846e+07	163212	1.09769e+06	119501	564673	136158	99869.7	795318	150710	117950	4.26237e+06	98291.3	102479	101406	284176	107239	106236	137643	1.86607e+06	147257	124333	558608	149064	98645.4	171609	110163	111676	388199	98993.2	95950.4	91031	122228	129485	116346	107358	57023.6	105879	140809	78563.3	97331.8	85866.8
neg-8.37_674.40459	100764	74782.9	103768	72770.5	1.13323e+08	180820	97907.9	106243	4.79387e+07	144828	1.0495e+07	106040	8.17067e+06	143635	88620	1.08391e+07	1.82432e+06	110683	5.37995e+07	87219.4	90935.4	89982.9	582457	95158.9	94269.6	140493	2.087e+07	485186	2.19609e+06	6.52729e+06	166772	1.02003e+06	152278	97753.5	99096.3	3.55094e+06	87842.2	85142.2	80776.9	108460	114900	103240	105723	50600.2	93952.3	124948	69713.7	86367.9	76194.4
neg-8.383_638.45594	95008	433672	88331.5	341666	154572	419842	87226.7	1.52326e+06	134357	1.35804e+06	69399.1	423219	126426	148798	627644	233686	92727.5	439448	91627.9	1.03407e+06	9.55802e+06	401566	214653	161599	117893	1.0056e+06	95037.4	111231	104237	356920	112596	1.39179e+06	129625	1.61813e+06	168777	103692	90238.8	72476.1	554083	635255	158439	170490	173526	1.05077e+06	820315	121826	769791	745207	713647
neg-8.393_1035.68487	116585	78115.1	108392	90231.4	93431.8	708372	110305	804628	102924	229272	85160	326056	1.74168e+06	182591	158950	1.22496e+06	2.06982e+06	109327	112437	1.10401e+06	569109	135256	607333	684611	119523	3.1441e+07	116621	136492	1.37925e+06	1.21041e+06	172299	408248	159063	118294	126457	127242	110733	1.32462e+06	1.29033e+06	189082	535751	131393	456475	63569.8	1.41877e+07	130515	137178	104847	685496
neg-8.53_203.07915	277014	247879	188965	168645	182556	465283	531891	286039	630236	538441	532378	154885	377802	239279	539308	272491	238891	447244	424402	192871	472336	135303	362201	387017	205029	209344	185939	206676	232083	313406	441279	423623	148166	412966	514349	315737	525132	242932	213351	173354	213885	435042	716570	222424	179977	307879	345200	409909	284616
neg-8.691_762.20243	146810	185338	100579	119568	160943	87940.9	117916	202287	509475	897795	110912	423485	78685.2	186471	91060.5	103960	91386.3	127534	143151	100429	144318	4.13128e+06	195836	139839	286742	889705	102297	116215	249381	150466	116714	141443	112394	102185	108149	66907.9	131133	101759	83568	132106	378426	7.34226e+06	5.52405e+06	92552.9	121734	107365	104515	97098.1	127076
neg-8.694_708.28256	45258.8	49859.6	30979.9	36828.9	49573	27087.2	36319.9	148150	73283.3	965853	34162.6	162607	24236.3	57436.1	28048.1	25872.2	28148.4	38211.2	44092.9	31979.2	44452.2	1.4872e+06	60320.8	43072.7	243974	405958	31509.2	35795.9	145061	46346	36187	43566.7	34075.6	31474.7	33311.7	20608.7	81200.2	31268	25759.2	40690.9	334957	3.58324e+06	1.93542e+06	28507.8	40874.6	33070.1	32192.3	29907.8	39141.5
neg-8.694_780.21323	50303.9	128691	34433.4	40934.3	55099.1	30106.7	40368.7	227069	159284	1.13993e+06	37970.8	215896	26938	63838.6	31174.7	42520.9	31286.2	62141.7	49008.1	35544	49407.4	1.71417e+06	67044.9	47874.2	481857	459106	35021.6	39786.2	139259	51512.3	40220.9	72861.8	37874.1	34983.3	37025.1	22906	157189	34753.6	28630.7	45226.9	707455	3.6553e+06	2.12516e+06	31685.6	36341.6	36756.6	35780.9	33241.7	43504.8
neg-8.695_808.20827	49326.9	92929.7	33764.6	40139.2	54028.9	29522	39584.6	123769	127141	323955	37233.3	175160	26414.8	62598.7	30569.2	47533.5	30678.6	44594.2	48056.2	34853.7	48447.8	1.59087e+06	65742.7	46944.3	126603	341754	34341.4	39013.4	140498	50511.8	39439.7	47482.7	37138.5	34303.8	36306	22461.1	43230.5	34078.5	28074.6	44348.4	256119	2.93537e+06	2.23198e+06	31070.2	35635.7	36042.6	35086	32596	42659.8
neg-8.999_550.2971	465563	4.3559e+07	124732	131765	7.66499e+07	2.01774e+08	857894	1.11381e+06	2299370146	912083	2.97111e+08	315313	2.59516e+08	247701	505723	2.41354e+08	5.09076e+06	120164	3.23794e+08	607099	240168	924568	269030	1.11452e+06	240214	126629	2.93095e+08	180937	5.48689e+06	4.41091e+08	210822	3.97942e+08	138983	214038	141012	1.65877e+07	250847	229457	111924	147760	1.03677e+06	2.58901e+06	154218	1.33201e+07	212253	356586	587688	2.52251e+06	1.66196e+06
neg-9.07_360.06739	126256	127074	111003	167113	126413	6.99662e+06	116581	212654	162612	186798	870460	366647	2.09963e+07	107654	85696.4	3.61284e+06	102548	111757	1.78927e+07	164868	360852	180353	218936	143337	277907	114216	8.66597e+06	141632	150144	244227	159558	2.58222e+06	109347	134569	110506	127616	114490	227524	99142	97364.1	257800	185091	173435	6.7907e+06	146058	148956	113091	115739	158518
neg-9.62_642.26622	49229.1	41727.1	49394	38228.8	930142	1.17093e+06	41746.5	40107.8	1.42594e+06	51634.1	1.02317e+06	59603.8	1.42143e+07	61125	38076.2	5.59943e+06	55313.9	45150.6	1.26894e+07	115684	1.12973e+07	138126	96692.6	62871	79122.7	57494.5	1.37547e+07	75428	44343.8	7.68303e+06	163933	4.60789e+06	43536.2	66094	47117.3	46778.1	43607.9	898797	41742	40292	58092.8	56005.5	56464.8	296377	69016.6	65155.8	36936.7	35390.9	41761.6
neg-9.63_272.17807	55423.7	45952.5	53421.3	42099.9	641715	1.14846e+06	45973.9	44169.2	864580	56862.7	1.2307e+06	65639.5	6.7612e+06	67314.7	41931.9	2.61132e+06	60555.9	50298.2	8.28654e+06	43144.4	3.63042e+06	104313	106484	68205.5	84370	63316.5	7.67545e+06	83066.1	48834.2	2.521e+06	180533	1.76055e+06	47944.8	72786.8	52286.1	51515	47696.8	467834	45968.9	44372.1	61947.6	59902.1	62182.5	424658	73364.2	71753.6	40677.1	38974.7	45990.5
neg-9.689_630.48677	876121	6.20409e+06	2.32824e+06	313346	4.27997e+06	732785	7.16904e+06	5.91049e+06	2.59753e+06	623398	355706	1.5552e+06	5.41153e+06	6.01087e+06	2.04724e+06	5.63797e+06	2.02997e+06	3.02251e+06	1.47395e+06	1.29013e+06	145679	698888	4.12513e+06	3.19766e+06	3.19781e+06	2.69365e+06	6.71312e+06	49332084	2.15715e+06	1.65494e+06	1.01947e+07	2.20693e+06	276830	873361	6.91451e+06	2.56796e+06	2.32567e+06	8.44422e+06	3.02043e+06	815099	1.27054e+06	3.62554e+06	2.26908e+06	301727	684807	3.65441e+06	2.13756e+06	562680	760435
neg-9.775_594.32371	158308	1.0648e+06	89843	81908.9	8.4901e+07	1.48252e+06	67944.2	166586	2.17609e+07	84343.3	2.11678e+06	141926	1.80799e+06	108114	87541.9	2.24104e+06	115974	114724	6.11212e+06	241162	140865	94487.2	180061	129356	115793	122772	3.30893e+06	125177	6.67931e+06	3.78319e+06	469288	3.59462e+06	84451.1	112514	143847	1.93462e+06	193485	94601.7	75438	86185.4	154014	107936	112228	93378	123213	116258	167194	164971	83654.9
neg-9.805_404.12762	81982.3	98610.9	87137.3	83039.7	133371	2.51624e+06	68222.9	85026.7	310691	74618.1	3.37242e+06	126932	6.66279e+06	101785	61431.8	134073	102602	101496	2.65333e+07	98297	154112	74170.8	159299	114441	74026.9	108616	1.07686e+07	110744	81522.1	1.34665e+06	489778	106773	74713.5	99540.7	191048	101593	66242.6	94202.2	66739.6	76247.8	136256	95490.5	99287.3	1.55141e+07	109006	102853	69083.5	61696.2	66414.5
neg-9.811_410.24419	3.36376e+06	4.15546e+06	5.2646e+06	8.6693e+06	3.82741e+06	7.16146e+06	9.20667e+06	6.49217e+06	6.12656e+06	6.68909e+06	2.42623e+06	1.55908e+07	6.34433e+06	1.81318e+07	7.06747e+06	5.35397e+06	7.62438e+06	7.63987e+06	2.86367e+06	4.78075e+06	1.47915e+07	1.98516e+07	3.7086e+07	4.92339e+06	1.22865e+07	4.183e+06	7.7363e+06	4.96279e+06	1.3289e+07	1.46807e+07	1.71923e+07	9.54025e+06	2.96414e+06	9.6856e+06	1.77321e+07	4.62622e+06	2.52998e+07	1.02007e+07	1.15523e+07	7.29056e+06	9.78231e+06	9.88649e+06	7.11663e+06	1.90819e+06	9.63658e+06	4.1195e+06	1.04922e+07	4.99554e+06	9.40042e+06
neg-9.821_336.14012	86915.1	422306	91983	192940	5.27575e+06	1.21522e+08	68625.5	89852	7.07574e+06	79568.4	1.05484e+08	846472	2.45039e+08	102386	61794.3	3.07333e+06	103207	134265	9.99536e+08	2.46042e+06	8.59095e+06	74608.6	160239	115116	74463.8	109257	5.94837e+08	111397	82003.2	5.96497e+07	537739	6.49208e+06	83115.4	93504.6	128012	102192	112213	3.97111e+06	68933.8	76900.3	593601	96054.1	99873.3	4.72168e+08	109649	111876	113678	204914	72007.6
neg-9.835_421.11818	92539.6	114829	98829.7	88935.1	121219	2.26152e+06	73066.4	95666.5	277041	84717.4	1.56736e+06	135944	4.03062e+06	109012	65793.2	85276.4	109886	108701	1.69717e+07	105276	90804.5	79436.7	170609	122566	79282.6	116328	9.17627e+06	118606	87309.8	1.12556e+06	572537	114353	84144.6	99555.6	136296	108805	74044.3	141180	73394.7	81876.7	145929	102270	106336	8.60158e+06	116745	119115	73998.5	70228.9	76667.4
neg-9.908_501.32121	1.99613e+07	5.12038e+07	5.73177e+07	2.35101e+07	3.7723e+07	1.81407e+07	1.81043e+07	5.19705e+07	3.03759e+06	9.07292e+06	2.37677e+07	1.84312e+06	2.51988e+07	6.18343e+07	3.42956e+07	2.3636e+07	2.19065e+07	1.80373e+07	1.27635e+08	9.01364e+07	2.01059e+07	6.20445e+06	5.59797e+07	8.51795e+07	7.91268e+06	1.18639e+07	3.15153e+07	2.03162e+07	3.40967e+07	3.54175e+07	2537402550	1.36041e+07	2.16203e+08	1.12896e+07	3.236e+08	7.10997e+07	1.9145e+07	2.79904e+07	1.4604e+07	1.97481e+07	1.21865e+07	1.37025e+07	6.79898e+06	5.53801e+07	1.11771e+07	9.52824e+06	2.4914e+07	2.14126e+07	2.68188e+07
neg-9.919_594.25353	580872	3.77549e+06	2.42696e+06	1.41063e+06	2.65814e+06	1.70372e+06	1.46215e+06	2.36041e+06	770151	1.2287e+06	1.18558e+06	1.33568e+06	1.87935e+06	4.02139e+06	1.18209e+06	1.0694e+06	417846	2.0863e+06	1.69039e+06	4.41792e+06	297200	851355	850279	3.27142e+06	786860	1.91636e+06	3.42781e+06	1.12867e+06	6.36413e+06	226452	233983734	1.25756e+06	2.20171e+08	595072	9.05533e+06	2.66163e+06	8.67385e+06	1.942e+06	2.72599e+06	2.40858e+06	2.02887e+06	1.72107e+06	1.18973e+06	1.66099e+06	2.98833e+06	1.76283e+06	1.96208e+06	1.64535e+06	1.61222e+06
neg-9.933_297.12721	637127	4.16227e+06	3.10549e+06	1.93727e+06	3.32899e+06	1.83812e+06	1.65266e+06	2.36041e+06	835586	1.35572e+06	1.48278e+06	1.33759e+06	1.9409e+06	4.01593e+06	1.25286e+06	1.64389e+06	815216	2.2915e+06	3.31926e+06	9.00449e+06	297200	1.35434e+06	743947	3.23134e+06	1.08887e+06	1.9979e+06	2.84894e+06	1.84597e+06	6.90455e+06	571168	2.31252e+08	1.63168e+06	2.36898e+08	781642	1.0602e+07	2.6566e+06	8.2665e+06	2.14101e+06	2.74948e+06	2.23663e+06	2.00096e+06	2.13586e+06	1.17909e+06	1.91674e+06	3.69064e+06	1.9034e+06	2.10613e+06	2.1434e+06	1.78471e+06
neg-9.94_287.1136	127371	2.33949e+06	2.3496e+06	629665	5.64612e+06	1.00286e+06	811673	569196	866632	110475	861388	236175	942376	1.81702e+06	849229	1.20312e+06	165884	196502	2.46e+06	5.21921e+06	104297	172825	219005	1.25583e+06	102001	1.05962e+06	2.20572e+06	1.05585e+06	1.83579e+06	582698	1.99143e+07	406957	6.16699e+06	129797	2.85753e+06	1.63317e+06	2.84262e+06	1.59826e+06	1.32825e+06	473226	341544	1.4003e+06	397550	271291	1.51066e+06	740848	378286	266923	560478
neg-9.945_576.24356	1.57929e+06	1.36907e+07	1.42818e+07	6.82542e+06	1.44819e+07	9.00367e+06	8.19316e+06	4.5129e+06	3.43637e+06	984010	9.70248e+06	1.2665e+06	8.44395e+06	1.95776e+07	6.94519e+06	9.59768e+06	2.32687e+06	3.07704e+06	3.1835e+07	3.33732e+07	1.59539e+06	1.24422e+06	4.05381e+06	1.29163e+07	1.44888e+06	8.23232e+06	1.73182e+07	4.34491e+06	1.85582e+07	2.40173e+06	1.83537e+08	3.07101e+06	6.2781e+07	1.45092e+06	1.87849e+07	1.26777e+07	1.51468e+07	1.49232e+07	1.14706e+07	2.25608e+06	1.21919e+06	1.06604e+07	1.20072e+06	2.36219e+06	7.46084e+06	4.17859e+06	2.86878e+06	1.59962e+06	1.29657e+07
neg-9.946_296.11918	1.20004e+06	1.29559e+07	8.22755e+06	3.89473e+06	2.02217e+07	1.31989e+07	5.70758e+06	5.59907e+06	1.23258e+07	2.26498e+06	9.38276e+06	437156	1.15371e+07	1.31106e+07	6.95969e+06	3.11584e+07	2.14939e+06	6.69684e+06	2.84025e+07	3.40533e+07	1.18357e+07	1.2414e+06	8.73374e+06	1.26234e+07	657347	9.66758e+06	4.71448e+07	7.47386e+06	1.95358e+07	2.87725e+07	2.73223e+07	2.04773e+07	9.7303e+06	2.56314e+06	8.85585e+06	9.55561e+06	1.10141e+07	1.67689e+07	1.36326e+07	2.27264e+06	3.82431e+06	1.37881e+07	2289707	3.66742e+06	1.82245e+07	1.1448e+07	3.41564e+06	1.77295e+07	9.48187e+06
neg-9.95_652.29619	446878	1.47735e+06	2.00239e+06	1.74126e+06	4.15301e+07	7.24337e+06	2.99824e+06	3.26214e+06	2.43159e+07	1.00718e+06	5.25328e+06	683015	9.33581e+06	1.301e+06	2.50787e+06	1.91451e+07	379038	3.87137e+06	1.27092e+07	1.01298e+07	413366	940621	1.15017e+06	1.18245e+06	350481	1.15276e+06	2.42713e+07	623694	6.20679e+06	2.78614e+07	1.45166e+06	3.11655e+07	989171	1.47144e+06	3.85343e+06	2.7577e+06	1.63739e+06	5.05823e+06	995533	406214	2.04069e+06	2.26042e+06	1.14233e+06	1.03256e+06	5.99872e+06	2.38307e+06	3.34227e+06	5.78075e+06	2.14881e+06
neg-9.953_592.2385	1.20004e+06	1.35445e+07	7.81329e+06	3.70417e+06	1.93917e+07	1.20266e+07	5.36368e+06	5.78474e+06	1.1989e+07	2.21259e+06	9.74457e+06	437156	9.51151e+06	1.35732e+07	7.65759e+06	3.02643e+07	1.83674e+06	6.23831e+06	2.57715e+07	3.06904e+07	1.25374e+07	1.19128e+06	9.35236e+06	1.26627e+07	678877	1.01017e+07	3.11153e+07	7.79559e+06	1.81264e+07	2.81106e+07	2.78628e+07	2.03407e+07	9.7303e+06	2.34136e+06	9.30235e+06	9.88029e+06	1.13118e+07	1.34205e+07	1.1834e+07	2.25854e+06	3.14001e+06	1.49103e+07	2.23751e+06	3.64147e+06	1.55148e+07	1.16794e+07	3.50025e+06	1.50687e+07	1.02404e+07
neg-9.957_288.12177	1.58425e+06	1.38863e+07	1.11294e+07	6.78786e+06	1.3625e+07	7.99074e+06	6.44615e+06	4.39874e+06	3.50454e+06	1.01476e+06	9.85457e+06	1.23628e+06	7.57499e+06	1.77811e+07	6.92149e+06	9.26386e+06	3.23237e+06	3.97621e+06	2.70587e+07	3.1455e+07	1.41025e+06	1.06687e+06	4.34581e+06	1.11199e+07	1.45231e+06	8.38192e+06	1.03242e+07	5.39445e+06	1.42822e+07	2.87986e+06	166132822	3.04777e+06	6.10654e+07	1.70393e+06	1.70897e+07	1.22647e+07	1.80616e+07	1.99089e+07	8.46518e+06	3.12307e+06	1.18213e+06	9.3654e+06	1.49749e+06	2.26191e+06	1.08133e+07	4.65209e+06	2.67675e+06	1.87227e+06	9.93656e+06
neg-9.963_578.25919	3.17409e+06	2.47629e+07	2.42488e+07	1.18959e+07	2.88982e+07	1.35071e+07	1.17367e+07	7.81406e+06	5.2562e+06	1.94534e+06	1.54584e+07	933191	1.92467e+07	3.4343e+07	1.91672e+07	1.71992e+07	5.32157e+06	4.96143e+06	3.55797e+07	4.47072e+07	1.99505e+06	2.39585e+06	1.18675e+07	2.5788e+07	3.51601e+06	1.73974e+07	2.68508e+07	1.42315e+07	4.9311e+07	8.12844e+06	3.64773e+08	5.60241e+06	2.56334e+08	2.8651e+06	29023920	2.66959e+07	4.17869e+07	1.90005e+07	2.43592e+07	7.5788e+06	2.11608e+06	2.54411e+07	3.64045e+06	2.67102e+06	2.81026e+07	1.41149e+07	6.55279e+06	4.26025e+06	1.20302e+07
neg-9.971_636.30109	2.35359e+06	6.12379e+06	6.81611e+06	3.03258e+06	3.16204e+07	1.57344e+07	3.26498e+06	4.40157e+06	2.76198e+07	3.39242e+06	2.54795e+07	3.48429e+06	2.5429e+07	3.38036e+06	3.03043e+06	2.88267e+07	1.82639e+06	4.743e+06	4.6128e+07	1.55384e+07	1.594e+06	3.21097e+06	2.95319e+06	4.0448e+06	2.85626e+06	2.9462e+06	3.28243e+07	2.64905e+06	1.30203e+07	4.4471e+07	6.79794e+06	3.24435e+07	2.73564e+06	2.68316e+06	5.16037e+06	4.67918e+06	8.04258e+06	5.85186e+06	3.44585e+06	1.49893e+06	4.96327e+06	3.38849e+06	3.12421e+06	1.44086e+06	5.68485e+06	2.80903e+06	7.38501e+06	3.9302e+06	4.58362e+06
pos-0.761_124.09772	1.76254e+06	411857	1.54762e+07	6.8144e+06	907949	306649	1.03187e+06	1.09309e+06	522077	299350	578689	198921	476087	7.77651e+06	3.62037e+06	446956	4.42082e+06	2.01222e+06	2.69741e+06	236476	672288	199278	5.68654e+06	242859	363423	1.91591e+06	755205	676113	309047	814486	9.56837e+06	575311	2.86851e+06	418332	3.70399e+06	213040	1.1735e+06	551052	2.2743e+06	422049	204234	477917	436186	817665	169288	445922	296528	401130	1.89607e+06
pos-0.778_291.19474	1.35104e+06	278605	2.36763e+06	149557	295901	208807	2.65267e+06	586205	166776	140708	230445	127191	477940	147010	433993	227598	697239	128376	550806	2.55924e+06	239974	958671	1.15128e+06	128465	1.84874e+06	112436	765421	426254	2.11836e+06	91864.8	154816	282191	134096	112614	4.47388e+06	4.83426e+06	7.15147e+06	112177	296649	113816	112323	138982	99577.5	152193	948040	158737	2.44836e+06	140189	450740
pos-0.782_366.95645	3.37279e+06	288497	111926	301723	1.56485e+06	135836	1.1086e+06	184488	325588	109910	1.14668e+06	99351.8	465426	294574	961062	244113	745218	1.72383e+06	1.00967e+07	1.00057e+06	596048	156499	4.41382e+06	804987	368176	1.17297e+06	444264	2.57642e+06	193086	274927	9.13221e+06	337804	1.31711e+06	2.22157e+06	979909	105894	122073	2.15921e+06	87393.5	559673	87738.3	2.97689e+06	1.24274e+06	1.2049e+06	1.47557e+06	1.31782e+06	887850	1.55398e+06	539398
pos-0.788_244.99708	406510	3.78903e+06	113824	1.28569e+06	415474	795959	157075	208160	371771	469754	646770	359166	955785	79431.8	477849	435982	218413	428463	113538	72368.8	245255	259743	149856	90352.5	217794	381183	123551	105752	97679.7	329138	109182	86253.5	300534	79204	1.32837e+06	1.25984e+06	1.08571e+06	71361	96627	295847	177708	467065	192256	513786	176995	132024	88165.5	207416	1.66559e+06
pos-0.799_278.07844	277945	1.2732e+06	278424	522337	725482	318095	120809	130994	713986	496310	3.89994e+06	264590	309780	322846	574919	208195	122928	145863	164123	439903	150504	170436	201485	118804	184600	1.03563e+06	246549	146902	3.06387e+06	162350	236217	243070	143323	135385	714168	721720	518642	211181	238524	613769	103020	292893	188813	697045	149771	205954	130649	242699	995583
pos-0.8_176.13149	1.18108e+07	1.98914e+07	2.08718e+07	500680	4.81175e+06	1.27131e+07	1.6893e+07	1.45353e+07	211845	210762	219866	125309	1.17983e+07	770818	4.43642e+06	7.25783e+06	4.28565e+06	175223	210941	4.58e+07	3.06916e+07	8.16106e+06	2.85155e+06	2.26256e+06	2.80742e+07	3.31195e+06	166381	2.25571e+07	3.13145e+07	413565	7.71593e+06	1.63004e+07	182586	1.08732e+07	4.48281e+07	1.29824e+07	3.34889e+07	122162	6.86702e+06	134870	150700	115856	299848	350749	1.72704e+07	737406	2.0239e+07	454446	1.07995e+07
pos-0.802_206.14204	2.4327e+06	3.00221e+06	5.65773e+06	942519	1.86207e+06	1.25407e+06	2.75919e+06	5.43481e+06	866163	677356	946875	531727	3.07433e+06	556807	1.43788e+06	1.39738e+06	1.44026e+06	365727	592803	3.87238e+06	5.91135e+06	2.86638e+06	2.01966e+06	1.62895e+06	3.50577e+06	1.46211e+06	893943	9.77414e+06	8.34346e+06	639646	827353	2.08407e+06	1.08063e+06	469219	3.06995e+06	2.09311e+07	1.04609e+07	538232	1.11975e+06	1.96916e+06	733528	910770	1.06679e+06	2.29977e+06	1.2216e+07	812756	6.94692e+06	1.37723e+06	3.39039e+06
pos-0.825_274.12928	1.51545e+06	5.89583e+06	2.41786e+06	677236	4.44377e+06	6.60872e+06	2.79442e+06	2.87165e+06	4.65212e+06	3.16875e+06	2.06987e+06	3.12423e+06	7.42727e+06	2.54576e+06	4.34034e+06	4.13009e+06	3.04872e+06	700992	4.86392e+06	7.26091e+06	3.57835e+06	498176	2.005e+06	2.69383e+06	2.82917e+06	5.5596e+06	5.55294e+06	1.93189e+06	2.81822e+06	5.54544e+06	5.54347e+06	830783	871121	3.71332e+06	3.43822e+06	3.7602e+06	1.07842e+06	1.26372e+06	1.83758e+06	5.0596e+06	1.4667e+06	2.45142e+06	6.30027e+06	3.89869e+06	1.16774e+06	846974	2.28017e+06	573096	1.11083e+06
pos-0.829_259.12307	992060	5.89583e+06	942645	943900	3.30535e+06	6.60872e+06	1.07326e+06	2.87165e+06	4.65212e+06	3.16875e+06	2.06987e+06	3.12423e+06	7.42727e+06	688744	2.75779e+06	4.13009e+06	1.74423e+06	864052	1.66669e+06	7.26091e+06	3.57835e+06	606726	1.69914e+06	2.57889e+06	2.82917e+06	5.5596e+06	3.56667e+06	1.93189e+06	2.81822e+06	5.92853e+06	2.68635e+06	1.75558e+06	871121	3.22619e+06	1.23613e+06	3.56169e+06	881911	1.26372e+06	1.83758e+06	2.25605e+06	1.07002e+06	2.45142e+06	6.30027e+06	3.24234e+06	1.43938e+06	955593	1.128e+06	649527	697312
pos-0.832_131.10589	5.24049e+07	4.18761e+07	7.79045e+07	2.23517e+07	3.71972e+07	8.62095e+07	2.32523e+07	1.4157e+07	3.17831e+07	8.3954e+06	380575712	1.86742e+07	8.18742e+07	1.40217e+08	3.83721e+07	9.19954e+07	3.58661e+08	8.75545e+07	9.00349e+07	6.87905e+07	2.41451e+07	2.52752e+07	1.84238e+07	4.87557e+07	2.09349e+06	9.985e+07	1.204e+08	4.08048e+08	1.4526e+08	2.58569e+07	1747717629	8.68125e+06	3.9443e+07	3.63192e+07	9.94085e+06	1.47993e+08	1.4426e+07	9.0826e+07	5.05776e+08	3.4015e+07	1.54533e+07	1.27234e+06	6.74918e+07	4.86456e+07	1.2377e+07	1.71383e+08	7.2305e+07	7.8076e+07	3.35386e+07
pos-0.833_193.09511	3.98292e+07	2.89305e+07	1.13561e+07	1.27776e+07	1.83347e+07	2.06353e+07	1.26949e+07	1.85929e+07	1.17501e+07	3.80903e+07	6.21903e+07	2.75432e+07	2.64423e+07	3.16286e+06	1.34196e+07	2.08519e+07	1.67657e+07	3.98966e+06	7.05665e+06	3.9087e+07	3.08478e+07	3.09238e+07	4.75192e+06	1.38165e+07	3.69843e+06	4.78724e+07	1.49409e+07	4.02743e+07	1.2818e+07	2.31666e+07	4.69436e+06	2.66035e+07	2.3395e+07	1.49858e+07	3.133e+06	1.36905e+07	6.87466e+07	6.26341e+07	2.26906e+07	1.85052e+07	3.55788e+07	1.12659e+08	3.93684e+07	1.4934e+07	5.07349e+06	3.00782e+07	2.86315e+07	2.73165e+07	1.58664e+07
pos-0.834_172.08484	2.60598e+07	2.44421e+07	2.59171e+06	3.03988e+07	1.01822e+07	1.4662e+07	7.0211e+06	1.01181e+07	9.21759e+06	4.82616e+07	1.10743e+08	1.87091e+08	1.65168e+07	787124	9.90358e+06	9.86956e+06	1.16535e+07	5.74982e+06	1.21346e+07	1.27037e+07	2.12484e+07	1.48642e+07	1.65093e+06	3.08504e+07	6.35626e+06	8.02257e+07	7.58529e+06	1.17732e+07	2.5054e+06	7.76983e+06	985566	1.3525e+07	2.35522e+06	1.79983e+07	1.07556e+06	9.58075e+06	2.70954e+07	1.34966e+07	1.97888e+07	1.49252e+07	1.90843e+07	1.27075e+07	3.09775e+07	2.06976e+07	7.22254e+06	5.6013e+07	1.72252e+07	9.51866e+06	3.33331e+06
pos-0.837_336.13584	2.05148e+06	6.30447e+06	1.17088e+06	639525	3.93748e+06	1.77449e+06	1.3799e+06	2.57214e+06	5.06729e+06	3.27795e+06	3.12297e+06	2.30365e+06	8.45292e+06	1.64986e+06	3.88062e+06	4.53084e+06	2.05506e+06	1.1411e+06	3.14735e+06	8.25414e+06	5.82442e+06	621691	1.49763e+06	2.57906e+06	2.82917e+06	4.12141e+06	6.55341e+06	1.90095e+06	3.09798e+06	4.92651e+06	1.29672e+07	2.64538e+06	848767	8.26031e+06	3.29715e+06	4.16033e+06	1.49523e+06	1.54802e+06	2.74055e+06	4.4405e+06	1.42289e+06	3.26953e+06	4.21834e+06	3.54799e+06	1.51225e+06	992819	1.53844e+06	455816	821276
pos-0.897_250.10574	297420	354234	375798	598216	303182	428605	286786	1.1993e+06	8.24303e+06	556545	347220	1.75509e+06	270630	1.52692e+06	248354	271893	656971	292096	607966	269192	388705	365422	486346	322008	347682	2.35287e+06	285616	839956	346654	9.02457e+06	401398	2.23035e+06	330588	338310	380028	333760	377369	355655	307327	339736	410416	1.73382e+06	306913	304055	2.03681e+06	872005	324504	800114	567584
pos-0.899_227.11452	341434	406655	431411	598216	348048	492032	329226	1.37678e+06	8.24303e+06	556545	398603	1.75509e+06	310679	1.33539e+06	285107	312129	754193	335322	697936	309029	446228	419499	558318	369660	399134	2.10214e+06	327883	964257	397954	9.02457e+06	460799	2.06044e+06	379510	388375	436267	383151	433214	408287	352807	390012	471151	1.73382e+06	352331	349051	2.03681e+06	1.00105e+06	372525	800114	651578
pos-0.899_282.1313	1.65479e+06	2.16669e+06	2.43135e+06	3.05137e+06	1.78932e+06	764909	4.30028e+06	650431	1.42662e+06	3.0288e+06	2.81213e+06	4.34984e+06	2.5897e+06	979543	2.11943e+06	1.00093e+06	991047	1.91457e+06	2.09354e+06	3.50527e+06	554050	661727	1.44961e+06	734273	758809	2.0645e+06	1.04228e+06	1.1642e+06	1.23897e+07	2.05252e+06	622914	2.2847e+06	1.7284e+06	1.54238e+06	675772	1.1263e+06	562555	2.33899e+06	1.52379e+06	3.0708e+06	1.0789e+07	1.91848e+06	773156	1.29889e+06	644650	570212	1.41225e+06	2.18143e+06	2.60229e+06
pos-0.905_220.1212	8.72596e+06	1.41002e+07	5.77426e+06	8.66913e+06	7.60367e+06	1.18476e+07	8.32236e+06	9.08526e+06	1.51058e+07	2.55584e+07	7.45529e+06	1.04521e+07	9.85313e+06	4.07671e+06	8.09923e+06	1.78174e+07	5.79823e+06	6.32743e+06	1.83026e+07	2.49166e+07	2.04772e+07	8.2271e+06	2.87184e+07	1.90154e+07	1.10626e+07	1.25108e+07	1.47751e+07	1.03785e+07	1.66489e+07	2.72536e+07	1.06671e+07	3.17263e+07	4.68254e+06	3.58415e+06	4.40675e+06	2.03717e+07	1.57527e+07	5.66466e+06	6.71228e+06	1.17157e+07	9.57086e+06	1.50477e+07	1.32213e+07	1.9804e+07	6.17045e+06	5.4704e+06	1.57152e+07	4.26119e+06	1.66159e+07
pos-0.905_239.11457	546432	855602	690431	801547	4.49784e+06	6.4004e+07	2.69853e+06	946904	1.59836e+06	2.73268e+06	1.82341e+07	6.68602e+06	2.0082e+07	779017	3.55732e+06	2.39171e+07	587291	927568	1.46387e+06	1.15541e+06	1.86708e+06	671367	1.32238e+06	1.26912e+06	1.67864e+06	581654	524745	741629	636887	4.55597e+07	737464	786121	771813	724991	1.39067e+06	613196	1.73944e+06	653424	4.09254e+06	1.57339e+07	3.25331e+06	2.68674e+06	4.85668e+06	1.2636e+07	830923	734976	730356	1.61644e+06	2.9223e+06
pos-0.908_153.09093	1.36057e+06	4.07666e+06	912025	1.2227e+06	1.73145e+06	1.19742e+07	643065	1.31318e+06	3.24696e+06	4.63809e+06	3.85179e+06	5.09709e+06	8.82424e+06	950778	556889	4.47949e+06	716779	978493	2.55324e+06	3.8555e+06	6.83126e+06	1.02859e+06	1.12393e+06	9.15786e+06	7.339e+06	3.23786e+06	1.49792e+06	2.43137e+06	2.83849e+06	5.5541e+06	961037	7.23779e+06	802750	1.13127e+06	852145	1.88385e+06	2.19331e+06	2.14326e+06	1.12659e+06	3.6287e+06	1.24774e+06	2.91077e+06	5.57251e+06	5.41858e+06	1.31982e+06	1.12536e+06	2.9378e+06	1.29875e+06	1.3902e+06
pos-0.925_241.03531	1.91972e+06	1.31144e+07	5.19e+06	3.51455e+06	1.08929e+07	8.83412e+07	1.43793e+07	8.93856e+06	2.59001e+07	4.93193e+07	6.11315e+06	5.46445e+07	1.95416e+07	9.99154e+06	1.25609e+07	5.33487e+07	2.7264e+06	2.96972e+06	1.18405e+07	2.36291e+06	2.91884e+07	2.38818e+07	2.17576e+06	9.46999e+06	7.51914e+06	7.93311e+06	5.66728e+06	2.07837e+06	3.3506e+07	9.33439e+06	6.15799e+06	7.09406e+06	9.3359e+06	5.02991e+07	4.42979e+06	2.90298e+07	2.52863e+07	5.74323e+06	6.01921e+06	3.59348e+06	2.69041e+07	1.25695e+07	6.16999e+07	23950357	5.29683e+07	6.14394e+06	5.88416e+06	6.21008e+06	2.10228e+06
pos-0.968_159.06854	1.26279e+07	1.20644e+06	1.87752e+06	1.95469e+06	1.0524e+06	2.05899e+06	1.09019e+06	1.80481e+06	3.86964e+06	3.29645e+06	1.14963e+06	1.96653e+06	5.98744e+06	1.23022e+06	1.78594e+06	2.73204e+06	2.0111e+06	716754	1.68947e+06	5.29274e+06	1.87435e+07	2.58664e+06	3.30177e+06	1.81575e+06	2.06647e+06	3.99757e+06	1.39259e+06	6.33768e+06	1.3332e+06	5.52246e+06	3.2064e+06	1.43243e+06	3.16765e+06	4.72965e+06	2.19698e+06	1.76442e+06	3.31188e+06	937239	3.07649e+06	2.27036e+07	3.08479e+06	1.79272e+07	4.25426e+06	3.22698e+06	1.46501e+07	5.35378e+06	1.98136e+06	1.01759e+06	2.05396e+06
pos-1.344_161.06969	226913	397052	369697	413547	283299	385044	314511	392934	568836	272594	323108	1.05834e+06	1.24595e+06	361951	475932	548629	248545	239821	437778	308461	454612	327186	380169	866785	354214	334765	256163	360254	149403	257943	691190	441996	291478	127477	314963	80879.2	212794	263751	440973	459419	587468	182724	452330	301052	342854	451863	308957	290374	424640
pos-1.35_227.11455	177299	536393	679768	954468	221356	1.00695e+06	245743	1.77479e+06	1.0672e+07	481599	211619	1.08632e+06	169177	846305	200686	394458	567635	187385	564252	237750	245130	255647	297045	296932	338345	1.96826e+06	200153	552946	337188	2.15932e+07	304376	1.26406e+06	227746	244660	584540	100630	269924	206082	193512	236794	445703	1.81687e+06	227310	630475	1.89106e+06	388549	1.10295e+06	226884	1.05414e+06
pos-1.353_517.23779	224566	536393	679768	1.09515e+06	280368	1.00695e+06	311258	1.92041e+06	1.27273e+07	609991	268036	1.08632e+06	214279	951214	254189	499618	567635	237341	714677	305839	373896	323802	376237	376093	428547	1.96826e+06	253514	700359	427081	2.15932e+07	385522	1.34454e+06	288463	309885	788013	464167	341885	429603	245101	299923	276655	2.23262e+06	287910	462526	1.89106e+06	492134	1.27651e+06	295756	1.33517e+06
pos-1.358_549.20984	256212	448319	986706	785133	319878	813914	314694	1.98469e+06	1.31619e+07	439665	290853	1.26571e+06	244475	1.34522e+06	290009	351369	653138	269374	432053	348938	426585	369432	429256	429093	488938	3.41787e+06	289239	614619	487265	2.67888e+07	806465	1.60362e+06	329113	457212	488132	521359	582501	490143	263790	342188	675437	2.88267e+06	379343	672676	2.345e+06	408640	885645	337434	479469
pos-1.375_536.19737	556166	795605	895449	748143	676784	754761	692479	948758	6.7525e+06	720349	476685	831620	507170	641999	581685	861698	576964	621122	844381	691493	989773	779723	827044	755563	1.00955e+06	1.75499e+06	423399	745677	981420	1.70269e+07	1.02356e+06	2.10603e+06	555667	877641	882243	862025	895055	1.07962e+06	566552	595651	778718	1.46828e+06	930300	602500	1.33672e+06	829414	771070	827523	678193
pos-1.424_186.05298	1.41042e+07	8.88695e+07	5.60447e+07	2.80772e+07	8.48843e+07	592735184	3.1216e+08	2.4415e+07	8.77793e+08	1.36919e+08	2.25668e+08	2.8821e+07	5.16079e+08	1.56928e+08	1.62396e+08	9.21859e+08	9.50462e+07	3.08406e+07	4.97028e+07	2.41205e+07	4.10365e+08	5.9113e+07	1.07101e+07	4.94715e+07	5.37926e+07	1.40939e+08	2.55357e+08	1.30618e+07	1.96922e+08	1.23849e+08	4.82014e+07	2.83296e+07	1.66446e+08	7.27124e+08	1.39144e+08	3.66758e+08	630976784	3.56792e+06	2.57353e+08	1.08877e+08	8.32359e+07	6.33974e+08	1138965351	549852881	3.1279e+08	8.98176e+06	1.45259e+08	4.38978e+06	3.40656e+07
pos-1.427_230.03921	750068	940478	1.06625e+06	739169	732833	7.04039e+06	1.8479e+06	6.95464e+06	7.81785e+06	761993	2.30499e+06	711929	4.76736e+06	3.60823e+06	724955	1.75413e+07	649592	770823	774636	669155	2.59734e+06	824236	3.46364e+06	723503	635234	989600	786583	1.02544e+06	1.43227e+06	835724	580558	645799	1.26021e+06	7.51503e+06	1.00016e+06	3.26935e+06	4.96297e+06	594695	1.18525e+06	776758	943157	13623603	2.47255e+07	4.50587e+06	2.24209e+06	1.0739e+06	751199	746385	983795
pos-1.43_444.10595	449475	939485	570693	435959	431592	3.56804e+06	1.06173e+06	413350	6.22538e+06	565686	1.65594e+06	424667	3.28168e+06	506487	345679	9.09631e+06	609386	498437	443978	368922	1.45123e+06	468873	512630	523160	405706	522135	940258	432170	1.29277e+06	519596	353009	385612	1.1109e+06	3.4795e+06	446814	2.46738e+06	2.14386e+06	373729	786671	463513	591526	5.06065e+06	1.00286e+07	3.76134e+06	1.1118e+06	600455	555830	398771	600218
pos-1.434_298.1528	1.97263e+06	2.87163e+06	6.35011e+06	2.09527e+06	2.26859e+06	1.88502e+06	2.74187e+06	4.70415e+06	1.45431e+06	2.7167e+06	3.79299e+06	2.30705e+06	2.41995e+06	2.31245e+06	2.87163e+06	1.88672e+06	2.59401e+06	2.93418e+06	2563781	1.22571e+06	4.74786e+06	2.01215e+06	339252	1.04297e+06	7.0199e+06	5.62063e+06	1.02018e+06	2.41802e+06	1.19694e+06	1.42614e+06	824795	4.45104e+06	2.43014e+06	1.80391e+06	765404	1.06619e+06	7.76988e+06	1.88279e+06	1.18609e+06	2.85144e+06	3.19329e+06	1.51418e+06	1.44547e+06	1.11679e+06	1.90768e+06	479753	2.20822e+06	4.28126e+06	2.90023e+06
pos-1.435_203.07947	1.45613e+07	2.9176e+08	1.57053e+08	9.17791e+07	168452129	1000200192	5.72949e+08	9.2566e+07	1391032165	2.66207e+08	4.13161e+08	8.36686e+07	8.10754e+08	3.19262e+08	290663042	1529649962	1.95762e+08	1.11915e+08	1.12162e+08	9.4561e+07	6.8526e+08	6.84609e+07	3.2569e+07	1.32792e+08	106629004	2.7051e+08	3.67696e+08	5.71006e+07	432317651	2.34977e+08	9.80964e+07	1.1454e+08	3.4302e+08	1372350662	2.9809e+08	609230486	1021532549	4.99727e+07	4.53913e+08	2.05027e+08	8.2908e+07	1069123663	1970701108	9.21278e+08	6.77211e+08	5.47014e+07	3.23503e+08	9.90929e+07	137290665
pos-1.435_460.07845	183660	207847	246673	172435	176353	3.05522e+06	587766	168899	3.70882e+06	294918	690329	173523	2.20481e+06	195345	120496	8.08088e+06	154431	160255	181414	157910	1.23099e+06	209047	209466	176043	138379	144646	133541	162100	403438	252356	144243	149701	227974	2.91623e+06	123484	1.15863e+06	2.05944e+06	152710	279168	208419	154351	4.66317e+06	1.16462e+07	2.16931e+06	850335	245352	215152	164210	245255
pos-1.439_225.06118	2.42294e+06	1.50452e+07	3.99055e+07	2.89107e+06	9.79989e+06	6.8443e+07	5.46225e+07	8.02839e+06	8.1678e+07	1.1384e+07	2.27609e+07	2.23674e+07	3.31845e+07	4.8985e+07	1.71761e+07	1.2014e+08	1.58925e+07	7.82064e+06	1.02494e+07	3.05083e+06	4.20291e+07	504447	1.6741e+06	2.06104e+07	5.99618e+06	1.30604e+07	927210	1.25552e+06	2.41809e+07	9.61683e+06	3.80543e+06	5.69374e+06	2.02917e+07	224988995	2.44625e+07	3.07119e+07	4.96354e+07	5.26344e+06	4.63215e+07	1.72813e+07	663809	1.102e+08	2.40416e+08	47673997	8.34111e+07	4.80367e+06	1.42303e+07	1.06668e+06	648345
pos-1.445_226.13174	1.07671e+06	2.58746e+06	1.4041e+06	3.15929e+06	1.13313e+06	2.04017e+06	1.57266e+06	4.64385e+06	1.16088e+07	1.59997e+06	1.753e+06	8.17683e+06	2.14267e+06	809660	1.76864e+06	5.9155e+06	982683	1.54742e+06	2.17692e+06	3.20277e+06	2.54817e+06	1.26679e+06	2.24641e+06	2.66414e+06	2.37811e+06	5.63035e+06	2.23015e+06	1.68274e+06	1.75073e+06	2.5311e+06	1.1429e+06	2.01127e+06	2.45126e+06	1.31433e+06	1.54058e+06	1.63684e+06	1.41526e+07	1.66179e+06	1.93003e+06	3.93012e+06	1.84005e+06	1.29036e+06	1.63781e+07	4.28476e+06	3.29068e+06	1.65388e+06	2.03885e+06	1.7334e+06	1.75747e+06
pos-1.447_166.57393	382590	830925	783529	768149	478250	1.08963e+06	468588	732472	1.17731e+06	490116	1.4318e+06	819864	530959	406931	261107	2.33152e+06	677766	453745	437749	462156	1.73613e+06	550650	503284	482721	464968	995769	360568	481801	1.18372e+06	655401	377956	1.39152e+06	564663	335199	307578	302240	1.75932e+06	5.49369e+06	538524	654996	1.09356e+06	843295	1.9186e+06	1.87586e+06	461884	600632	626099	424680	662009
pos-1.451_316.12136	387952	554931	628954	469588	485685	644426	494413	683530	1.32967e+06	464447	1.85405e+06	971328	385108	429358	275497	1.3965e+06	723038	418203	456485	407295	856265	511363	516598	434198	386695	1.34316e+06	366919	419873	468402	469269	374346	893257	595783	353673	324529	299364	1.63877e+06	3.50095e+06	441790	469370	630251	486989	1.283e+06	1.09346e+06	487339	633734	451948	448085	676392
pos-1.451_350.17445	211488	545705	532589	524524	250578	491339	500820	461855	1.24677e+06	288073	982563	280978	191720	213211	136806	1.6679e+06	480846	266172	229357	204855	1.41572e+06	314704	263694	292370	268712	438271	188919	241161	937097	391086	198029	951950	337171	209848	372618	167531	2.23988e+06	4.21095e+06	219384	322732	367889	397349	1.37612e+06	1.26899e+06	242003	314700	234545	303979	346858
pos-1.452_171.05323	2.1414e+07	1.01223e+08	7.41947e+07	3.47245e+07	9.31695e+07	6.11865e+08	3.17718e+08	3.94692e+07	8.85932e+08	1.57971e+08	2.46237e+08	4.92819e+07	5.27763e+08	1.63027e+08	173354409	9.30838e+08	1.05312e+08	4.59498e+07	9.48117e+07	1.30706e+07	429141044	8.07941e+07	3.11393e+07	2.27578e+07	7.41137e+07	1.53816e+08	2.54616e+08	2.2604e+07	2.16522e+08	126432636	6.11577e+07	4.74343e+07	1.80725e+08	7.45555e+08	1.42877e+08	3.75278e+08	6.36041e+08	1.05959e+07	270972853	1.20003e+08	9.73484e+07	6.4469e+08	1155289838	5.62442e+08	3.30371e+08	2.4137e+07	1.56916e+08	1.46913e+07	5.40001e+07
pos-1.469_323.10403	953308	2.52905e+06	1.43147e+06	870110	5.50056e+06	929726	3.79725e+06	1.48313e+06	4.56427e+06	1.04729e+06	1.3584e+07	4.01364e+06	4.77347e+06	687322	3.49728e+06	2.57694e+06	2.48832e+06	1.89684e+06	891426	2.35063e+06	790686	850755	2.72031e+06	3.65745e+06	3.45426e+06	2.13346e+06	7.08161e+06	1.10324e+07	792251	1.12326e+06	938522	1.97911e+06	2.3711e+06	2.3244e+06	3.44106e+06	4.57084e+06	6.24432e+06	2.05487e+06	1.90921e+06	4.7692e+06	1.10429e+06	2.46311e+06	5.56105e+06	1.27192e+06	1.76114e+06	983459	1.04143e+06	1.07765e+06	962961
pos-1.475_247.142	764433	614817	925898	273193	4.10511e+07	1.45085e+06	532417	239091	736113	1.21316e+06	509283	962518	976258	2.26759e+06	2.72568e+07	351991	1.0737e+06	507474	6.9516e+06	396341	724801	1.27564e+06	5.53119e+06	214675	900853	226752	1.99497e+06	3.21251e+07	460816	392343	2.50772e+06	353663	721253	364567	4.01942e+06	307439	1.79496e+06	288792	2.52074e+07	1.77605e+07	771532	302776	348340	1.55677e+06	424074	496053	935711	969623	875103
pos-1.5_188.06862	2.17388e+06	1.58205e+06	801108	4.38198e+06	678357	5.81225e+06	3.0112e+06	1.10717e+06	3.29567e+06	2.08666e+06	1.55588e+06	3.14427e+06	1.83964e+06	804839	6.61557e+06	485451	771496	3.38209e+06	8.26012e+06	1.58044e+06	3.15588e+06	1.35369e+06	1.44319e+06	3.08446e+06	9.92198e+06	3.53505e+07	596929	1.19107e+07	851526	1.97415e+06	1.13732e+06	5.44423e+06	1.03734e+06	3.59569e+06	821502	5.59563e+07	3.71609e+06	1.07812e+06	2.79055e+06	874453	5.35241e+06	1.22926e+07	3.89994e+06	5.21669e+07	1.76033e+08	871165	1.48339e+06	668484	1.36907e+06
pos-1.514_408.16488	224212	3.70407e+06	178030	306739	280643	559619	132715	120293	231799	778522	776590	107602	111759	369750	298894	174805	120374	127768	163338	311229	280036	178838	203340	117092	178122	456765	101500	189156	138843	139195	142189	189916	240364	135712	208149	160151	239743	132264	481705	182876	709576	99426.4	1.41383e+06	162865	208632	198549	149585	212728	190137
pos-1.532_274.16438	173040	282324	591302	253482	123793	7.24034e+06	526068	309910	478020	498859	197941	486837	320694	186618	233078	187834	833018	299476	337263	266905	124790	290793	381591	3.03211e+06	483815	994037	182887	116927	2.22749e+06	283609	256029	95101.8	133906	1.59746e+06	105916	205914	135890	237046	354787	295943	153606	236968	1.05177e+06	599811	4.05402e+06	3.07262e+06	1.03374e+06	1.04384e+06	1.06072e+06
pos-1.563_187.15722	3.45815e+06	3.11976e+06	2.81239e+06	235838	4.2335e+06	2.14232e+06	2.45031e+07	1.55291e+07	266915	202038	233025	157135	8.79473e+06	431273	4.56364e+06	2.67826e+06	7.48994e+06	178558	277642	8.5887e+06	8.06351e+06	3.12508e+06	845275	4.19351e+06	6.31271e+06	3.53658e+06	313731	1.33565e+07	8.01772e+06	155347	384986	2.61321e+06	218741	1.06483e+06	1.32719e+07	2.75725e+06	4.27975e+07	231811	3.5735e+06	318537	322546	280596	222639	213377	3.71865e+07	2.80583e+06	2.40697e+07	525334	7.70062e+06
pos-1.605_259.11682	1.77522e+06	3.95838e+06	1.84553e+06	4.88106e+06	2.61215e+06	3.8254e+06	2.7371e+06	1.4783e+06	4.1352e+06	3.85673e+06	1.97126e+06	5.16307e+06	2.9726e+06	2.25723e+06	4.81261e+06	3.36294e+06	1.38595e+06	759451	2.47725e+06	2.22366e+06	1.10307e+07	2.4137e+06	4.06125e+06	3.28273e+06	3.6582e+06	3.5198e+06	1.5443e+06	2.20538e+06	1.90922e+06	1.94579e+06	3.18339e+06	5.58616e+06	1.638e+06	2.22078e+06	3.64118e+06	2.41108e+06	4.76386e+06	1.85079e+06	3.77945e+06	6.44248e+06	5.09299e+06	919005	5.56672e+06	4.1774e+06	1.20775e+06	3.3753e+06	3.41712e+06	2.28318e+06	1.20838e+06
pos-1.638_314.15753	2.51429e+06	2.77397e+06	4.30841e+06	9.01755e+06	1.93047e+06	1.9732e+06	3.71914e+06	1.90788e+06	1.99487e+06	1.53989e+06	2.18e+06	1.51736e+07	2.06995e+06	2.38525e+06	2.33037e+06	1.81284e+06	1.50789e+06	3.23166e+06	2.87476e+06	1.8627e+06	2.43496e+06	2.61969e+06	3.14025e+06	1.72447e+06	2.72394e+06	1.95698e+06	1.6168e+06	1.66746e+06	8.2528e+07	2.30775e+06	2.94958e+06	1.7875e+06	2.19562e+06	3.00727e+06	2.34009e+06	3.11277e+06	3.09301e+06	5.21392e+06	2.38302e+06	2.03564e+06	1.71476e+06	4.23349e+06	1.47757e+06	2.66096e+06	3.35115e+06	2.34514e+06	2.90022e+06	2.22776e+06	8.45524e+06
pos-1.683_167.09464	1.00895e+06	472902	695963	1.17949e+06	2.53839e+06	3.02492e+06	1.94485e+06	1.8334e+06	504194	3.6968e+06	2.2384e+06	440812	1.97563e+06	2.53651e+06	1.74736e+06	2.64636e+06	3.64149e+06	3.76011e+06	3.04984e+06	9.88919e+06	1.29798e+07	1.16269e+06	5.24813e+06	510598	1.8077e+06	3.39471e+06	3.16362e+06	3.76425e+06	875216	3.14847e+07	3.54565e+06	457899	1.48165e+06	2.68766e+06	1.2723e+06	998025	2.84845e+06	3.12209e+06	321997	2.6216e+06	5.00243e+06	482054	2.91058e+06	2.84645e+06	4.34869e+06	2.82979e+06	2.20092e+06	923710	971691
pos-1.697_161.04771	2.30689e+06	9.28917e+06	1.66698e+06	8.4492e+06	2.21446e+06	2.62023e+07	1.9643e+06	2.13022e+06	2.14585e+07	1.59989e+06	1.69034e+08	4.20935e+06	1.80086e+06	1.46401e+06	1.18922e+06	8.03659e+06	1.97099e+07	905452	1.0602e+06	1.8496e+06	1.65841e+07	1.13916e+06	849506	5.25145e+06	1.88749e+06	4.05012e+07	446794	2.44549e+06	2.40485e+07	1.69557e+06	2.59385e+06	1.82583e+07	2.81879e+06	2.19826e+06	824458	3.39706e+06	4.71655e+06	1.23105e+07	2.36768e+06	1.34263e+06	2.74203e+06	2.81534e+07	7.1299e+06	4.30738e+06	1.78391e+06	4.79315e+07	1.75305e+06	762055	1.84974e+06
pos-1.81_336.13933	988083	902968	758496	2.59267e+07	802402	941645	899548	923291	1.04399e+06	847081	935122	3.95493e+07	646039	772702	723542	853304	730817	954956	1.19351e+06	627873	1.51356e+06	1.25185e+06	1.43862e+06	976918	1.20695e+06	799825	521495	769462	1.41849e+08	574061	1.52265e+06	905213	1.08276e+06	815188	1.17172e+06	803932	1.10928e+06	748820	928029	750611	910183	6.9752e+06	717217	1.20634e+06	1.51666e+06	1.93228e+06	1.12191e+06	1.15941e+06	1.28073e+07
pos-1.935_225.10029	2.6845e+06	6.56848e+06	2.52626e+06	7.02584e+06	3.41838e+06	7.72151e+06	3.54874e+06	2.96699e+06	5.78895e+06	3.10743e+07	2.80798e+06	9.71186e+06	6.42568e+06	2.25872e+06	2.86639e+06	3.848e+06	2.61877e+06	2.23829e+06	4.60947e+06	6.1162e+06	1.65047e+07	7.01522e+06	6.18327e+06	5.70235e+06	6.60127e+06	5.35357e+06	2.02621e+06	3.70902e+06	6.65408e+06	5.66949e+06	4.02199e+06	6.3667e+06	4.29767e+06	2.76833e+06	4.22092e+06	2.33929e+06	4.13464e+06	4.52597e+06	5.06702e+06	3.95272e+06	2.99243e+07	3.72797e+06	5.61038e+06	5.21931e+06	3.87846e+06	2.72368e+06	2.25051e+06	2.90431e+06	2.61484e+06
pos-2.908_189.17296	454268	759112	1.50503e+06	304690	316796	4.14653e+06	5.11969e+06	7.23621e+06	309384	303679	418154	282348	2.24442e+06	319396	747180	2.27388e+06	606523	296270	314079	1.25879e+07	1.59779e+07	2.61393e+06	503708	704509	1.11093e+07	1.57162e+06	252863	1.43824e+06	2.76208e+06	175727	301622	8.18927e+06	387708	263646	2.98517e+06	3.74088e+06	1.18366e+07	229266	252687	237033	218234	250005	209324	346783	1.35882e+07	530781	9.08208e+06	506557	3.42111e+06
pos-3.059_223.04816	884943	2.23226e+07	909595	2.04345e+06	2.04821e+06	1.33356e+06	542133	1.48427e+06	690603	3.04725e+06	2.57961e+06	2.58358e+06	995677	557661	794709	2.19808e+06	577809	626665	643608	557745	1.57246e+07	1.68109e+06	920261	2.7757e+07	2.65737e+06	1.30147e+06	1.27078e+06	542586	1.8773e+06	2.92792e+06	595664	3.87584e+06	963992	1.03957e+06	2.90622e+06	3.40961e+06	473289	3.07684e+06	488386	708777	1.77047e+06	8.04734e+06	667756	6.92663e+06	493519	1.19382e+06	537865	632359	5.75828e+06
pos-3.075_164.05089	1.19514e+06	2.67164e+06	3.70205e+06	1.12283e+06	538039	2.03005e+06	1.83417e+06	1.51807e+06	1.34772e+06	1.17786e+06	850884	1.01165e+06	478062	745505	490571	6.28305e+06	618151	2.39737e+06	1.95126e+06	466200	2.22094e+06	9.56574e+06	2.89468e+06	1.02208e+06	1.88774e+06	1.08115e+06	1.0534e+06	515180	3.00646e+06	1.75973e+06	608173	3.99679e+06	927915	1.19464e+06	845057	1.49615e+06	1.95566e+06	2.98498e+06	786779	1.13939e+06	865278	686179	459535	1.81775e+06	1.6111e+06	867619	1.28925e+06	3.98341e+06	2.2858e+06
pos-3.114_190.11086	28584931	3.12253e+06	3.9882e+06	4.33638e+06	1.62051e+06	5.869e+06	2.29417e+06	4.59642e+06	4.40837e+06	1.11202e+07	2.64416e+06	2.58612e+06	6.87833e+06	504105	7.52976e+06	3.20022e+06	2.67221e+06	1.32652e+06	2.1949e+06	1.24403e+07	1.15886e+07	6.20191e+06	4.15522e+06	1.95886e+06	2.53552e+06	5.21549e+06	1.49747e+06	3.40065e+06	8.06985e+06	3.94505e+06	2.90728e+06	2.50714e+06	2.20767e+06	3.07271e+06	3.43686e+06	5.17201e+06	4.00826e+06	873468	1.48486e+06	4.33264e+06	2.25136e+06	3.35958e+07	6.78102e+06	5.54505e+06	1.09415e+06	1.75625e+07	3.12823e+06	2.15542e+06	6.17275e+06
pos-3.116_358.21094	199900	422055	358546	924843	506959	1.6302e+06	298995	1.26869e+06	2.38172e+06	905785	377023	4.92134e+06	1.52649e+06	164611	169393	1.29571e+06	128459	230645	166879	3.24878e+06	2.56307e+06	164532	382140	1.39895e+06	1.37704e+06	1.00904e+06	276028	372407	540592	2.30292e+06	147699	1.41917e+06	689789	146348	522065	753330	3.95468e+06	454355	214028	1.03219e+06	859326	435080	3.75309e+06	2.09104e+06	1.54181e+06	252443	293528	656836	1.02297e+06
pos-3.141_462.23213	487529	364270	562520	3.87384e+06	355027	418943	478026	377261	430594	310168	854268	1.34689e+07	405047	552189	840460	310194	1.43294e+06	450239	599747	583255	327358	382703	439998	259669	476784	627311	295000	381383	5.93692e+07	563549	306419	307378	523696	497646	304689	740346	518170	318859	705556	570522	309429	8.25848e+06	343824	550686	309625	1.23561e+06	633706	1.07836e+06	1.7923e+06
pos-3.147_457.29057	263929	248200	303138	961322	192197	754799	1.06835e+07	832459	337639	183959	1.65348e+06	1.3464e+07	719147	9.61898e+06	918269	6.29529e+06	1.06077e+06	1.60103e+06	9.79923e+06	1.24235e+06	1.97813e+06	302696	232429	134882	573162	1.83088e+06	3.78523e+06	181735	644600	652830	1.20708e+07	675692	430451	1.09088e+07	574193	400794	479322	254704	454201	449852	167513	1.20909e+06	700552	429813	326622	586913	2.52578e+06	1.38106e+06	1.33143e+06
pos-3.15_541.18533	281751	210517	325089	241152	233602	643425	1.48177e+06	218025	248847	171248	262458	198004	342004	3.1999e+06	496210	475582	205555	326429	1.68477e+07	372542	189185	221170	254281	136348	193535	1.69997e+06	1.35147e+06	275905	263642	185543	1.21752e+07	163211	302652	8.26961e+06	176084	427857	284213	184273	259328	318718	178824	183367	179284	318250	249137	662303	768117	961051	328728
pos-3.155_142.06315	1.0224e+06	372544	1.87717e+06	574733	611122	1.04916e+06	953652	1.07194e+06	6.93108e+06	1.41285e+06	1.34586e+06	7.49295e+06	1.01666e+06	867785	1.22075e+06	4.01651e+06	3.32032e+06	1.63793e+06	1.33503e+06	1.10819e+06	1.31861e+06	321000	1.25341e+06	5.16274e+06	1.51223e+06	1.32721e+06	954307	2.20953e+06	1.12237e+06	3.19839e+07	1.15638e+06	929761	1.27453e+06	2.13247e+06	1.60059e+06	1.22294e+06	1.25635e+06	1.88878e+06	1.24123e+06	4.71442e+06	925309	2.57092e+06	873294	1.65366e+06	1.90353e+06	1.30678e+06	1.0231e+06	1.12956e+06	974613
pos-3.179_312.09619	2.44965e+06	6.40749e+06	1.96883e+06	9.99898e+06	2.16062e+06	3.07946e+06	2.16136e+06	3.37049e+06	6.73952e+06	5.86466e+06	1.99234e+06	1.42414e+07	1.74585e+06	5.13729e+06	2.01804e+06	8.51642e+06	3.12378e+06	3.01346e+06	3.83719e+06	2.5494e+06	4.94866e+06	3.15536e+06	4.76241e+06	2.89592e+06	3.45456e+07	1.48284e+07	2.55552e+06	3.68272e+06	2.97472e+06	1.86346e+06	4.05998e+06	2.55594e+07	3.37299e+06	2.37304e+06	3.84788e+06	5.11707e+06	8.78474e+06	2.00776e+06	1.53468e+06	2.03777e+06	1.1107e+07	2.03963e+06	5.83598e+06	5.6427e+06	1.38308e+07	2.80542e+06	3.13501e+06	3.05432e+06	3.41106e+06
pos-3.187_587.28536	985983	962391	1.01391e+06	1.51754e+06	837808	2.10447e+06	1.54626e+07	2.14362e+06	1.21099e+06	1.15156e+06	1.02602e+06	850442	1.08949e+06	2.79718e+07	3.30746e+06	1.16954e+07	1.13261e+06	1.97189e+07	1.59842e+07	2.05383e+06	3.88488e+06	1.31556e+06	2.45255e+06	1.50714e+06	1.69509e+06	1.27846e+07	5.93224e+06	958522	1.53192e+06	2.23797e+06	3.3582e+07	1.71254e+06	1.73702e+06	4.42923e+07	1.85088e+06	1.28862e+06	1.65103e+06	987641	1.03757e+06	2.30731e+06	1.15461e+06	4.48945e+06	4.66956e+06	1.35765e+06	2.25095e+06	1.44474e+06	5.83445e+06	4.80969e+06	4.16235e+06
pos-3.191_227.11583	3.51342e+06	5.52473e+06	3.65868e+06	6.00121e+06	3.81373e+06	7.07864e+06	3.45302e+06	3.9568e+06	4.51005e+06	4.44675e+06	6.0219e+06	1.55538e+07	3.7611e+06	3.64767e+06	2.82783e+06	4.66758e+06	3.10901e+06	4.51203e+06	5.05262e+06	3.43891e+06	3.58295e+07	9.61437e+06	6.27092e+06	3.62698e+06	1.89733e+07	2.94586e+06	3.13434e+06	2.89199e+06	4.39254e+06	3.19773e+06	5.34599e+06	3.81797e+06	5.12151e+06	3.12471e+06	5.0667e+06	4.39103e+06	4.31754e+06	3.24034e+06	2.934e+06	4.63729e+06	1.38769e+07	2.88963e+06	2.49188e+06	8.4819e+06	5.98487e+06	3.99965e+06	3.91758e+06	4.82871e+06	4.61131e+06
pos-3.203_366.14322	3.64906e+06	5.98618e+06	1.28457e+07	3.8571e+06	8.9449e+06	3.07163e+06	8.61419e+06	4.25499e+06	7.76291e+06	3.81686e+06	1.1657e+06	8.8198e+07	3.42659e+06	2.28629e+06	2.51844e+06	6.26742e+06	9.07669e+06	2.15616e+06	1.51067e+06	5.78247e+06	9.18972e+06	4.72394e+06	5.27589e+06	1.69891e+07	4.97471e+06	8.77191e+06	7.42974e+06	1.83064e+06	2.6266e+06	2.11581e+06	4.36699e+06	8.11051e+06	4.98143e+06	1.48645e+06	4.17217e+06	5.88317e+06	3.14998e+07	1.95754e+06	1.43103e+06	868327	1.67369e+06	4.2315e+06	4.56895e+06	6.02876e+06	1.86751e+07	3.77836e+06	2.69094e+06	2.69092e+06	1.79276e+06
pos-3.203_370.13772	2.99775e+06	8.08098e+06	1.02184e+07	9.67956e+06	6.56262e+06	4.59838e+06	1.08381e+07	6.28711e+06	1.76343e+07	5.82735e+06	2.50897e+06	1.10002e+08	3.81552e+06	3.09898e+06	5.12397e+06	1.07656e+07	5.23265e+06	5.97202e+06	3.88652e+06	1.17182e+07	1.3216e+07	5.52204e+06	5.15648e+06	2.03737e+07	9.33671e+06	19220638	4.93932e+06	7.93369e+06	7.6866e+06	2.96232e+06	6.04891e+06	1.5151e+07	1.15289e+07	2.40355e+06	6.21657e+06	3.6452e+06	2.20826e+07	4.42227e+06	3.89818e+06	2.93949e+06	1.4452e+07	7.26091e+06	4.10255e+07	1.19237e+07	2.44834e+07	4.33769e+06	5.27717e+06	6.05898e+06	6.52885e+06
pos-3.207_267.14023	6.44772e+06	2.45446e+06	1.17238e+06	1.58145e+06	2.23251e+06	1.25917e+06	1.14161e+06	1.30544e+06	3.92874e+06	1.53453e+06	4.33292e+06	1.73512e+06	2.01247e+06	2.00614e+06	2.10388e+06	1.14058e+06	1.10856e+06	1.46959e+06	1.21269e+07	874550	1.79988e+06	1.77343e+06	2.14078e+06	1.41924e+06	1.95676e+06	1.02832e+06	1.42757e+07	5.31689e+06	1.24361e+06	1.19895e+06	5.4633e+06	2.01028e+06	1.78779e+06	1.48146e+06	2.43688e+06	1.65687e+06	1.40232e+06	922855	3.45117e+06	1.73463e+06	1.7723e+06	1.40185e+06	1.37e+06	4.42578e+06	2.69596e+06	1.39618e+06	1.19457e+06	6.55131e+06	1.83995e+06
pos-3.241_642.30228	181240	176260	235944	266897	523160	731946	183123	418809	174209	304779	941663	1.0188e+06	272598	2.17405e+07	1.17913e+06	1.85711e+06	134366	1.73807e+06	4.81479e+06	867954	105914	161790	2.31983e+06	176176	128439	4.53729e+06	3.16861e+06	1.36682e+06	959593	265766	1.94348e+07	109927	169759	2.06482e+07	131221	121429	172225	264204	142295	126244	99884.6	1.71872e+06	167553	246941	130561	192456	347315	829629	208696
pos-3.251_588.24007	311524	205813	415174	1.21106e+06	495386	642370	4.5159e+06	1.14527e+06	227224	184451	250466	1.32256e+07	176685	5.21806e+06	384489	907588	190551	2.15201e+06	2.51194e+06	1.67952e+06	184307	278093	255511	182200	220766	929654	344139	187621	284401	176162	3.31659e+06	380898	291790	3.25206e+06	225549	221613	290923	220393	212543	494210	171687	356487	161959	246752	228874	330803	1.73321e+06	807013	790158
pos-3.253_212.11615	3.22057e+07	2.67301e+06	6.57859e+06	2.33362e+07	2.77263e+06	1.45646e+07	8.04655e+06	16368770	2.6155e+06	2.63869e+07	1.8432e+07	8.88834e+06	9.71938e+06	6.3275e+06	6.75536e+06	1.21929e+07	4.01022e+06	1.3925e+06	3.05202e+07	1.66809e+06	1.52267e+07	2.32004e+07	7.00166e+06	5.06913e+06	4.34601e+07	2.96617e+06	2.50161e+06	2.46412e+06	1.30804e+07	6.74676e+07	3.90589e+06	6.52855e+06	3.1692e+06	3.48132e+06	2.29272e+06	2.02955e+07	5.86866e+06	5.64697e+06	5.17286e+06	2.95291e+06	6.9935e+06	3.59234e+06	2.31826e+07	2.76804e+07	4.27132e+06	2.94209e+06	1.72707e+07	5.15948e+06	5.62882e+07
pos-3.254_263.63756	2.32864e+06	187949	290069	1.36846e+06	1.46964e+06	1.02397e+06	581813	603752	1.14774e+06	691935	1.74316e+06	1.58083e+07	2.0834e+06	7.26826e+06	1.93718e+06	2.04352e+06	2.30242e+06	5.84583e+06	3.23181e+06	3.37285e+06	760456	3.19159e+06	178517	183938	130818	2.94817e+06	3.0447e+06	2.27813e+06	558599	1.70803e+06	1.08337e+07	1.61802e+06	272653	6.913e+06	306920	1.37067e+06	203259	255333	1.69078e+06	3.08245e+06	225839	1.5694e+06	677128	295691	257043	545204	646645	765702	492094
pos-3.255_312.09607	476648	3.97955e+06	1.2226e+06	6.23731e+06	586641	2.41145e+06	1.18281e+06	2.25645e+06	4.33078e+06	5.2902e+06	914295	1.03595e+07	1.6266e+06	2.48392e+06	893976	3.6307e+06	1.88934e+06	347268	978006	1.12789e+06	3.28779e+06	1.08997e+06	2.6399e+06	776030	1.85057e+07	8.58146e+06	741863	2.75479e+06	660510	942933	698058	1.48696e+07	1.21947e+06	576691	966503	2.23743e+06	3.13408e+06	566267	466651	411178	7.77819e+06	1.80218e+06	1.94975e+06	2.73357e+06	7.709e+06	360265	1.39723e+06	1.78412e+06	2.03184e+06
pos-3.261_184.07373	5.25219e+06	1.29859e+07	3.65178e+06	1.00348e+07	3.71236e+06	1.50791e+07	5.25104e+06	5.1349e+06	1.7697e+07	1.54815e+07	4.58673e+06	2.42284e+07	1.14096e+07	3.84446e+06	6.59937e+06	5.90905e+06	4.44653e+06	8.17826e+06	5.71363e+06	6.29752e+06	1.05179e+07	7.75851e+06	5.59562e+06	8.76646e+06	7.13276e+06	8.15729e+06	5.11456e+06	5.55935e+06	9.94383e+06	2.40989e+07	1.00801e+07	1.51147e+07	1.10138e+07	4.17072e+06	6.53753e+06	4.7601e+06	1.00182e+07	2.89946e+06	3.61539e+06	5.02255e+06	9.44688e+06	5.70923e+06	1.77596e+07	5.56931e+06	6.81497e+06	6.13519e+06	4.99198e+06	5.64927e+06	8.749e+06
pos-3.267_134.55116	179389	142211	286873	1.30977e+06	131130	533246	1.06074e+07	441561	148882	126560	154797	154005	122084	7.94983e+06	171052	2.58352e+06	129804	1.70596e+06	6.15363e+06	811376	127993	156296	176551	117689	260891	300304	372155	129641	218035	121723	3.58782e+06	138722	179538	2.22604e+06	142286	153129	171321	125349	137707	140537	112809	130924	111909	164089	151973	236826	996980	186109	575681
pos-3.269_884.46188	278740	425244	1.54019e+06	248220	211566	674851	500305	1.86363e+06	235320	204193	454297	201040	409458	256733	364409	198326	416308	517678	385005	270256	206504	252169	442551	189880	3.70206e+06	225833	620590	196366	188685	183872	449701	224277	284946	632063	225762	693948	276410	202239	1.21277e+06	701456	182007	178489	162119	383474	245194	286273	720488	1.41679e+07	319736
pos-3.27_177.08901	276692	126882	261338	140154	119458	144157	148961	127242	135630	115295	263597	112413	191534	144961	110961	141862	118250	150199	257234	121949	116600	142384	137556	107213	184667	140156	110720	102260	104335	739650	135215	107347	160891	141731	540529	527864	156071	114192	129587	128028	102768	100782	91538.4	143812	204154	501632	145957	216741	180535
pos-3.27_196.06658	461050	271215	558622	299586	255346	308141	392205	271985	289914	246448	417719	244616	321632	309861	237185	270579	252764	321057	464676	260672	249237	304352	343793	229172	307360	299589	236669	252447	231683	900623	289027	229460	343911	302957	679848	680325	333609	244090	272477	273665	219671	215425	195667	319527	364574	700675	311990	332775	385901
pos-3.271_446.20953	1.90851e+06	4.71127e+06	1.83199e+07	7.58114e+06	1.67186e+07	4.61935e+06	7.40466e+06	3.10415e+06	2.63498e+06	2.3399e+06	1.66454e+06	1.38727e+07	7.49136e+06	2.25848e+07	1.63657e+07	5.3543e+06	3.88828e+06	2.6774e+06	5.24026e+06	5.84698e+06	5.95529e+06	7.34858e+06	3.00207e+07	3.46005e+06	2.4232e+06	1.50491e+06	3.03959e+06	1.81917e+07	6.60448e+06	2.61887e+06	2.14107e+07	8.49595e+06	7.68258e+06	5.96183e+06	1.8767e+07	8.56387e+06	4.69288e+06	2.82615e+06	4.30581e+06	7.02711e+06	5.2967e+06	1.92158e+06	5.90777e+06	3.81939e+06	2.60788e+06	2.58059e+06	2.39457e+06	5.93102e+06	4.89585e+06
pos-3.275_311.09415	189318	5.72116e+06	1.88226e+06	8.55336e+06	143693	4.29864e+06	1.9704e+06	2.01963e+06	7.99761e+06	2.96504e+06	1.65833e+06	1.73133e+07	2.60702e+06	4.14733e+06	1.52959e+06	4.87517e+06	4.59932e+06	301317	261491	2.1307e+06	3.89958e+06	979117	4.3147e+06	1.41069e+06	2.87744e+07	2.42484e+07	2.9121e+06	4.45884e+06	891848	1.79733e+06	974785	2.48156e+07	1.92437e+06	862934	1.63877e+06	4.16093e+06	5.92301e+06	865075	370798	1.19093e+06	1.32417e+07	3.18836e+06	4.17897e+06	4.76573e+06	9.63483e+06	192073	2.44149e+06	1.55853e+06	3.19418e+06
pos-3.278_191.09476	6.58708e+06	9.97766e+06	6.11801e+06	3.23723e+07	5.96541e+06	1.40856e+07	5.48421e+06	11888728	8.75781e+06	1.09755e+07	4.40544e+06	9.20616e+06	8.12559e+06	3.17263e+06	9.13183e+06	5.23654e+06	2.48125e+06	5.99208e+06	4.55905e+06	1.30564e+07	1.46017e+07	7.15812e+06	5.97617e+06	1.98685e+07	3.83163e+07	7.54202e+06	3.80307e+06	7.29222e+06	9.26527e+06	9.85857e+06	6.39215e+06	5.73192e+06	3.70305e+06	5.09561e+06	6.29726e+06	4.24253e+06	5.99082e+06	6.07623e+06	6.40117e+06	1.11395e+07	1.84478e+07	4.02266e+06	7.18138e+06	9.75051e+06	1.35511e+07	7.2028e+06	5.18261e+06	7.4477e+06	1.14295e+07
pos-3.279_446.24228	1.09996e+06	1.56033e+06	2.76949e+06	3.1081e+06	1.59037e+06	1.91045e+06	719019	1.11686e+07	1.42416e+06	4.91993e+06	1.25214e+06	1.28972e+06	2.42116e+06	567482	3.88377e+06	2.46909e+06	1.20457e+06	2.4984e+06	663238	4.66585e+06	3.90043e+06	2.03252e+06	482145	5.99667e+06	2.24331e+06	3.25662e+06	1.78159e+06	3.58633e+06	2.05644e+06	4.13323e+06	392966	767647	708334	2.03555e+06	1.15102e+06	1.60848e+06	1.29162e+06	1.50612e+06	5.03518e+06	2.19275e+06	1.65401e+06	1.28506e+06	2.23245e+06	1.75062e+06	1.27752e+06	1.07202e+06	1.64006e+06	1.95943e+06	3.7044e+06
pos-3.282_450.20072	1.4853e+06	3.90416e+06	831587	5.54344e+06	563267	4.99853e+06	1.54981e+06	1.15725e+06	2.28906e+06	1.73076e+06	3.35917e+06	1.45984e+07	2.62497e+06	941127	2.81862e+06	1.80113e+06	677283	533248	1.16313e+06	3.34462e+06	3.08324e+06	3.11714e+06	1.57023e+06	2.49186e+06	2.25683e+06	581105	965019	1.69993e+06	4.03676e+06	2.01546e+06	2.67253e+06	7.6467e+06	4.64526e+06	866742	2.33145e+06	2.0783e+06	6.07647e+06	944587	337381	5.85348e+06	4.59609e+06	1.83177e+06	7.96529e+06	1.61859e+06	1.44784e+06	1.45977e+06	1.99059e+06	1.6207e+06	3.10707e+06
pos-3.285_300.16861	2.1028e+06	8.91613e+06	2.00983e+07	4.73083e+06	2.04132e+07	7.92482e+06	3.1924e+07	8.49671e+06	7.70924e+06	4.5097e+06	1.32699e+07	9.41813e+06	9.91649e+06	1.54355e+07	2.6639e+07	7.4352e+06	9.45556e+06	6.26303e+06	1.69414e+07	5.67829e+06	8.88173e+06	7.0993e+06	7.07855e+06	1.90607e+07	1.19177e+07	9.20947e+06	9.11569e+06	2.23758e+07	1.49912e+07	8.31849e+06	1.15218e+07	7.67255e+06	8.45443e+06	1.16619e+07	1.10344e+07	2.40039e+07	1.63385e+07	1.18892e+07	2.74086e+07	3.16708e+07	9.07625e+06	1.27678e+07	8.25817e+06	9.51383e+06	6.667e+06	1.26119e+07	8.6582e+06	1.12058e+07	1.4132e+07
pos-3.286_306.17993	3.53138e+06	733870	4.44515e+06	1.25319e+06	1.27737e+06	890654	1.92882e+06	1.30639e+06	2.69124e+06	1.04663e+06	3.35922e+06	1.21045e+06	512810	962391	2.1826e+06	1.12804e+06	1.01998e+06	1.32725e+06	3.43537e+06	1.84612e+06	2.81772e+06	3.38001e+06	697905	376642	1.76336e+06	2.20442e+06	1.24965e+07	3.30864e+06	254234	1.55423e+06	603300	2.14948e+06	1.02016e+06	1.50099e+06	1.14409e+06	932195	1.5036e+06	2.00382e+06	906914	1.24886e+06	544575	2.08337e+06	1.33546e+06	3.9582e+06	5.25658e+06	536140	1.10987e+06	2.97694e+07	3.7654e+06
pos-3.296_712.32829	275787	251317	459999	254481	290469	232582	1.51806e+06	229933	242232	210668	453277	442498	242755	1.01715e+07	1.18003e+06	5.06194e+06	240005	2.15271e+06	1.088e+07	293162	214473	284516	246178	177855	233494	1.65856e+06	439165	222755	389388	210360	2.80669e+06	219434	344196	8.00621e+06	261784	218928	411619	249281	281034	600493	182907	183705	189705	261764	283196	333557	4.24929e+06	626640	368734
pos-3.304_241.13164	2.71487e+06	9.75711e+06	6.13632e+07	4.29228e+06	9.48465e+06	1.93568e+07	6.52079e+07	1.50578e+07	3.64559e+06	7.5295e+06	6.58972e+06	5.15809e+06	5.40254e+06	1.21798e+07	1.36475e+07	1.35124e+07	1.34162e+07	9.55333e+06	8.00646e+06	1.36415e+07	5.44373e+06	2.98862e+06	4.57638e+07	4.31163e+07	8.22333e+06	8.98772e+06	7.69144e+06	1.78432e+07	1.8677e+07	1.04237e+07	5.3183e+06	3.38187e+06	6.08087e+07	1.47053e+07	1.40022e+07	1.17871e+07	4.09733e+07	7.31382e+06	2.23639e+07	1.22242e+07	1.21843e+07	8.10517e+06	7.63275e+06	1.53367e+07	9.84275e+06	1.19041e+07	1.23739e+07	1.14659e+07	9.9846e+06
pos-3.306_318.08556	340728	1.18956e+06	1.40606e+06	600688	4.51261e+06	208433	1.73168e+06	189182	868758	267641	701215	2.58685e+06	967214	484524	2.06148e+06	354229	655770	625457	308661	187773	1.18142e+06	317046	3.51882e+06	666571	1.03557e+06	1.58808e+06	260348	581871	1.19855e+06	182162	887310	2.72241e+06	2.50192e+07	291027	1.04013e+06	480504	7.1862e+06	349922	7.13186e+06	581000	3.6223e+07	706945	1.35645e+06	1.00887e+06	9.17844e+06	1.05908e+06	507954	1.51157e+06	290161
pos-3.307_206.09465	2.20901e+06	7.13958e+06	3.76889e+06	1.07667e+07	3.04494e+06	4.12201e+06	4.46556e+06	8.89811e+06	2.43904e+06	9.73504e+06	3.25453e+06	5.97765e+06	6.29694e+06	3.22398e+06	4.18174e+06	5.15537e+06	1.15731e+07	1.84361e+07	5.83186e+06	9.99657e+06	7.78605e+06	5.48405e+06	3.53132e+06	3.36888e+06	5.62482e+06	3.62996e+06	3.37688e+06	3.07829e+06	4.06943e+06	1.03603e+07	3.34017e+06	2.56857e+06	5.62812e+06	8.51161e+06	3.41109e+06	5.36329e+06	1.88984e+07	8.67575e+06	3.06468e+06	3.70315e+06	5.85921e+06	1.03706e+07	5.40051e+06	2.93079e+06	8.96064e+06	3.21545e+06	1.16861e+07	4.16179e+06	4.778e+06
pos-3.313_161.04787	3.07092e+06	8.90046e+07	5.85332e+06	1.11348e+08	3.89873e+06	6.2132e+07	3.82582e+06	7.50785e+06	9.4047e+07	1.25558e+07	2.09185e+07	2.54942e+07	2.28543e+07	3.13777e+06	5.5207e+06	9.45012e+07	7.69261e+07	3.85566e+06	3.81293e+06	5.25033e+06	3.07782e+07	1.64292e+07	1.20292e+07	4.96066e+06	8.97051e+06	2.96566e+07	3.46349e+06	1.02556e+07	5.65124e+07	1.48583e+07	4.35042e+06	7.23256e+07	3.08104e+06	8.90614e+06	4.89629e+06	1.33416e+07	5.16856e+07	2.6496e+07	4.53429e+06	6.20899e+06	2.35191e+07	1.06654e+07	4.30814e+07	2.53564e+07	1.51916e+07	1.08906e+07	6.55768e+06	5.2388e+06	3.9729e+06
pos-3.313_207.05341	2.54962e+06	9.47968e+07	4.22866e+06	1.13795e+08	2.77973e+06	6.0153e+07	2.25569e+06	6.45285e+06	9.26637e+07	1.31534e+07	2.16489e+07	2.87337e+07	6.37724e+07	2.32566e+06	4.61226e+06	9.73804e+07	7.96963e+07	2.66856e+06	3.19424e+06	5.17309e+06	2.88482e+07	1.44502e+07	1.05843e+07	3.46828e+06	8.82344e+06	2.85714e+07	2.57094e+06	1.08561e+07	54849865	1.5931e+07	2.4535e+06	7.50197e+07	4.0062e+06	9.0399e+06	3.87864e+06	1.31095e+07	4.74437e+07	2.61186e+07	3.63281e+06	6.36688e+06	2.55618e+07	1.03163e+07	4.50281e+07	2.97792e+07	9.02754e+07	1.28172e+07	5.45317e+06	4.96967e+06	3.51129e+06
pos-3.313_225.06407	3.18933e+06	7.76369e+07	3.31125e+06	9.19958e+07	1.81893e+06	5.12498e+07	1.46251e+06	7.06111e+06	7.67076e+07	1.24847e+07	1.83934e+07	2.59623e+07	4.31788e+06	557330	3.83295e+06	7.41032e+07	6.35185e+07	707473	3.11645e+06	5.8726e+06	3.0138e+07	1.52812e+07	1.06212e+07	2.91527e+06	6.32856e+06	2.41634e+07	5.6856e+06	8.70875e+06	4.4607e+07	1.21788e+07	2.39829e+06	6.83557e+07	1.76388e+06	6.64943e+06	2.82793e+06	8.13991e+06	4.02041e+07	1.97426e+07	2.5197e+06	2.26001e+06	2.03262e+07	9.74496e+06	3.78341e+07	2.54034e+07	2.55767e+06	1.22118e+07	4.6177e+06	3.19881e+06	3.45037e+06
pos-3.317_196.05993	607967	6.5367e+06	2.74708e+06	2.16938e+06	6.79438e+06	1.74632e+06	1.5353e+07	2.09231e+07	1.2674e+06	4.70509e+06	1.10615e+07	1.12301e+06	1.80346e+06	597950	6.44263e+06	5.60595e+07	6.73699e+06	6.50664e+06	5.91144e+06	2.39546e+06	6.42069e+07	6.3023e+06	1.10896e+06	1.07971e+06	468194	2.64485e+06	308311	1.5169e+06	1.38102e+06	1.51558e+07	6.68679e+06	3.05689e+07	3.01861e+07	3.09577e+07	7.46417e+07	9.48057e+06	3.65283e+06	576039	220863	2.31456e+06	6.4747e+07	3.28771e+06	1.52338e+06	5.6516e+06	3.30758e+07	289893	9.25335e+06	5.65693e+06	1.15528e+07
pos-3.325_330.08883	256975	1.11932e+06	284658	656044	1.65532e+06	521036	281725	134897	1.48183e+06	313761	1.76579e+06	160361	1.94356e+06	119966	2.77884e+06	689043	129892	188010	588007	205160	119995	364081	660983	182535	143184	119657	2.19851e+06	8.29081e+06	188386	200477	170136	918445	506621	700771	178262	113841	1.47532e+06	121685	130794	559607	160083	123350	128948	505415	153951	494303	169928	298560	191858
pos-3.331_611.28102	566207	128221	190838	116024	600040	179912	2.25505e+06	397854	105935	483867	1.22349e+06	1.74871e+06	313343	1.38027e+07	2.24334e+06	3.77317e+06	427671	6.2989e+06	1.91871e+07	1.34293e+06	105453	1.39273e+06	122279	79274.6	107549	5.66808e+06	2.37186e+06	525615	495772	590651	7.71213e+06	386195	1.48799e+06	6.62133e+06	97230.8	100921	435961	109514	1.33908e+06	851362	85723.9	244692	82260.4	451652	130065	147125	7.40079e+06	566216	166381
pos-3.336_584.30775	821262	1.1331e+06	1.70983e+06	342889	949928	443159	827710	496208	448640	335238	287203	3.08474e+06	2.25946e+06	174949	216868	623683	3.31174e+06	5.68859e+06	1.52887e+06	1.63705e+07	106102	121831	2.40078e+06	173773	137235	193287	5.62167e+06	5.43833e+06	170839	5.25757e+06	1.16771e+07	2.61006e+06	474106	470985	362103	4.31577e+06	1.08514e+06	528254	515272	566088	234181	1.33379e+06	1.56116e+06	334662	134830	2.08143e+06	6.71658e+06	426284	212988
pos-3.353_191.09474	2.97682e+06	6.6354e+06	2.56457e+06	1.24422e+07	5.06321e+06	8.63183e+06	2.0677e+06	1.3945e+07	6.46564e+06	1.1602e+07	2.8262e+06	8.94417e+06	7.05949e+06	2.53321e+06	3.01797e+06	3.96303e+06	2.69729e+06	6.08045e+06	3.0532e+06	8.16968e+06	1.57485e+07	5.74812e+06	4.608e+06	5.86869e+06	3.97419e+06	4.37244e+06	1.81391e+06	2.22706e+06	5.42093e+06	8.42099e+06	2.94607e+06	1.05478e+07	3.96714e+06	1.55293e+06	2.70139e+06	2.88791e+06	6.2757e+06	2.2429e+06	2.16112e+06	6.58066e+06	6.4656e+06	4.92428e+06	1.33899e+07	4.04735e+06	3.34241e+06	3.62101e+06	2.71743e+06	2.61078e+06	3.712e+06
pos-3.353_600.33877	530325	814913	1.85929e+06	851039	224558	387213	2.37557e+06	1.10655e+06	814005	1.00046e+06	1.0429e+06	1.17967e+06	767085	520762	225680	2.18741e+06	1.01261e+06	627135	1.14543e+06	510987	3.88059e+06	586301	1.45939e+06	1.41678e+06	1.02366e+06	621110	543307	446764	595825	580739	315348	3.03149e+06	410005	1.8781e+06	224297	328454	932010	1.14239e+06	1.33727e+06	652564	1.16084e+06	639792	1.77195e+06	355061	496452	452093	841658	671100	779149
pos-3.354_746.29139	165078	160906	269030	200991	121162	1.0916e+06	4.0499e+07	657761	109329	105968	136050	117341	108416	2.90477e+07	1.84053e+06	2.00165e+06	155189	7.68238e+06	4.22681e+07	798756	118910	138457	221418	94731	298547	6.71623e+06	891822	123616	411357	122964	3.19513e+07	115596	222159	2.36917e+07	105859	109326	175558	287889	122708	124400	102046	106744	184001	861387	154261	153123	1.49562e+07	2.07348e+06	525619
pos-3.355_324.14374	2.95494e+06	3.46389e+06	1.76324e+06	4.04314e+06	793174	1.68445e+06	2.23392e+06	4.23205e+06	3.5788e+06	4.13587e+06	3.98547e+06	2.54471e+06	1.52473e+06	2.12985e+06	1.15592e+06	1.42036e+06	5.19809e+06	1.9809e+06	1.84472e+06	1.50111e+06	4.69219e+06	1.57464e+06	1.66846e+06	3.0529e+06	1.02906e+06	2.01672e+06	1.00327e+06	1.35128e+06	2.87284e+06	1.92161e+07	3.40881e+06	1.79116e+06	1.17133e+07	1.47273e+06	3.80077e+06	4.70391e+06	1.78542e+06	751470	1.1328e+06	2.4581e+06	2.62321e+06	2.03294e+06	3.44814e+06	1.9904e+06	2.22564e+06	5.57454e+06	1.10094e+06	2.75038e+06	2.19586e+06
pos-3.355_505.23921	204784	199609	565840	392915	1.60764e+06	575679	1.10307e+07	489463	246134	217720	550429	1.08491e+07	742679	2.04252e+07	962857	3.31165e+06	1.11556e+06	5.92002e+06	1.27461e+07	3.6597e+06	178779	345475	255346	213988	139753	2.70106e+06	1.25122e+06	558147	388221	853897	6.91239e+06	195142	275594	3.99928e+06	1.27471e+06	136741	325487	179491	2.29545e+06	842874	155328	525427	446357	163138	191366	373158	440929	1.90903e+06	765935
pos-3.356_247.05171	1.13617e+06	6.19152e+06	2.02719e+06	7.29412e+06	2.00273e+06	2.87658e+06	1.82912e+06	3.47994e+06	2.22129e+07	1.13195e+07	1.57738e+06	2.6608e+07	7.6164e+06	725000	5.40465e+06	7.84535e+06	2.03165e+06	2.9981e+06	1.12775e+06	4.58064e+06	4.68112e+06	2.23379e+06	1.63213e+06	6.27156e+06	3.73246e+06	2.01112e+07	4.18127e+06	2.95702e+06	2.36788e+06	1.40994e+06	968016	8.19541e+06	2.36368e+06	6.20204e+06	1.12818e+06	3.39426e+06	1.55267e+07	919630	5.93053e+06	1.20775e+06	4.58658e+06	4.52193e+06	1.7767e+07	8.2006e+06	4.83122e+06	3.49457e+06	1.32517e+06	1.74513e+06	1.0353e+06
pos-3.358_162.07179	1.10919e+06	2.22214e+06	488778	2.4933e+06	924566	762606	718789	2.55214e+06	2.46124e+06	4.03726e+06	2.39315e+06	1.05615e+06	323940	379422	1.13091e+06	600640	1.5776e+06	1.48149e+06	743848	391078	810192	544762	730886	490655	731901	1.03923e+06	984071	436986	882480	1.88874e+07	506046	270323	559304	340629	1.07563e+06	2.15737e+06	808578	261293	1.03758e+06	1.46244e+06	1.06103e+06	1.83071e+06	710030	1.54383e+06	1.7338e+06	1.03305e+06	615954	1.06789e+06	455692
pos-3.36_323.13899	3.61384e+06	2.36344e+06	384604	2.50831e+06	1.76138e+06	981601	556012	2.99962e+06	2.62934e+06	4.93647e+06	2.96409e+06	878872	2.51753e+06	617064	1.13752e+06	1.22557e+06	1.40588e+06	1.40894e+06	1.24617e+06	903535	2.12667e+06	422859	1.76957e+06	870212	178940	988189	909116	699398	750597	1.64605e+07	1.23638e+06	863034	579294	268031	1.68053e+06	2.38643e+06	654468	367677	1.86817e+06	1.70344e+06	1.22477e+06	2.44366e+06	1.38434e+06	1.3781e+06	1.46484e+06	1.52501e+06	1.67689e+06	1.08278e+06	403455
pos-3.363_267.65618	383640	1.52101e+06	711350	1.67145e+06	703507	470786	857052	2.14271e+06	323128	856604	799987	1.63285e+06	637938	853728	372803	462236	237931	1.64643e+06	1.38347e+06	441756	874567	830098	355823	445162	655902	715878	469316	684996	229332	519388	662741	774135	885475	473839	594156	1.33012e+06	1.1343e+06	461428	595913	745974	622993	377469	696392	4.17452e+06	1.01677e+06	265340	637121	877805	325887
pos-3.367_323.17248	3.05999e+07	1.59422e+06	3.60418e+06	2.58175e+06	6.30644e+06	7.12964e+06	5.51804e+06	7.89096e+06	1.39268e+06	7.43447e+06	3.70783e+07	2.61118e+06	1.65484e+07	1.17095e+06	1.37824e+06	1.85864e+06	5.02928e+06	8.51717e+06	8.72169e+06	2.32227e+06	1.30472e+06	4.89577e+06	752584	2.55605e+06	4.82758e+06	1.93746e+07	8.17477e+06	1.22615e+07	1.41874e+06	2.15839e+06	1.93656e+06	2.83351e+06	2.6726e+06	1.15293e+06	5.80155e+06	2.36744e+07	3.43702e+06	3.1546e+06	2.19272e+07	1.79993e+07	1.5926e+06	1.96096e+06	1.56726e+07	2.6218e+06	7.3758e+06	1.14705e+06	2.52e+06	1.6372e+06	2.31276e+07
pos-3.374_451.15312	3.72093e+06	767897	307772	246616	192690	5.08097e+06	2.27519e+07	3.26694e+06	552470	673044	468194	424537	658206	5.43018e+07	2.78257e+06	2.65769e+07	193485	3.48249e+07	1.42492e+07	1.00382e+07	220503	352850	241807	3.61037e+06	416821	3.04722e+07	1.45202e+07	633312	1.29008e+06	170557	8.57695e+07	3.48358e+06	262162	4.95579e+07	2.42485e+06	1.53898e+06	279144	3.11477e+06	2.47575e+07	1.14712e+07	140296	1.23973e+07	1.07343e+07	904617	558073	709243	6.48473e+06	2.24965e+06	2.78947e+06
pos-3.375_617.21599	902329	261165	536407	429820	335833	1.0828e+06	2.23363e+06	530776	300709	196326	296987	269063	214845	3.8583e+06	2.85408e+06	4.47457e+06	328404	1.11199e+06	3.1172e+07	296778	384309	614972	421438	216080	421102	1.42737e+07	7.38177e+06	319963	477778	272858	2.3703e+07	519597	456915	4.61119e+07	965233	774861	486511	259446	318125	298909	244518	1.20663e+06	1.01404e+06	422567	972649	589575	1.15587e+06	1.7448e+06	490650
pos-3.376_269.65414	547559	1.48393e+06	1.11355e+06	719549	693205	343540	1.50664e+06	2.24408e+06	367046	319744	445529	597989	1.0125e+06	231062	269229	290947	199285	532778	886624	215924	860112	603630	747813	903309	463157	621690	510274	496742	289929	491066	390518	314060	299129	337261	585730	1.2262e+06	736616	347819	387643	353464	447764	313348	500518	3.42304e+06	590231	1.45384e+06	1.69073e+06	363817	1.43223e+06
pos-3.376_585.3472	527231	699202	757225	1.06877e+06	324481	353092	612452	518538	537046	470628	660913	905964	259854	375634	441792	288907	2.25286e+06	539389	853708	744264	498749	771433	345571	497929	663694	285077	2.24569e+06	690581	543608	911021	1.26962e+06	440332	873078	818382	563985	1.23221e+06	605335	855712	1.05633e+06	855079	596712	671518	399712	336881	568319	377801	1.85657e+06	1.47273e+06	2.29196e+06
pos-3.393_328.16376	2.10921e+06	3.38738e+06	2.02834e+06	1.44551e+06	1.55203e+06	2.4774e+06	2.80591e+06	2.72388e+06	1.0516e+06	1.38395e+06	1.16322e+06	1.36163e+06	928218	1.8112e+06	2.49041e+06	2.66529e+06	1.60545e+06	1.36715e+06	2.87825e+06	1.47871e+06	1.44905e+07	1.99549e+06	2.4566e+06	2.39708e+06	2.31201e+06	1.54847e+06	1.0991e+06	1.43229e+06	2.4322e+06	3.17207e+06	2.09559e+06	5.02952e+06	1.49172e+06	1.01665e+06	2.04807e+06	1.72132e+06	5.5809e+06	1.23667e+06	1.36865e+06	1.91523e+06	3.16916e+06	871049	2.10896e+06	4.59586e+06	2.87338e+06	1.78442e+06	3.71578e+06	1.34128e+06	1.53048e+06
pos-3.398_987.50426	629925	2.04082e+06	835661	863259	240650	239445	345437	323457	930044	518512	347402	231451	561136	347063	321914	1.59967e+06	277455	408305	2.44952e+06	346630	343919	441502	733675	496896	2.27608e+06	326309	328252	957521	828941	202061	1.07285e+06	277100	818475	303626	1.00358e+06	272765	522824	313591	520381	251754	408570	606335	273150	489240	2.74052e+06	441004	1.23948e+06	8.4583e+06	3.9659e+06
pos-3.399_233.10535	1.60182e+07	2.89509e+07	2.06144e+07	2.7177e+07	8.22827e+06	1.51705e+07	1.34342e+07	1.11089e+07	3.05754e+07	5.14932e+07	3.84943e+07	3.60486e+07	1.99163e+07	4.26711e+06	6.58409e+06	3.05777e+07	1.63833e+07	1.00248e+07	7.6736e+06	5.45835e+06	8.86693e+07	3.82357e+07	1.90127e+07	1.0853e+07	8.43638e+06	1.23132e+07	4.18859e+07	3.2542e+07	9.3482e+06	1.51604e+08	5.49702e+06	3.08602e+07	1.09377e+07	8.27208e+06	1.25224e+07	1.97497e+07	2.1937e+07	9.63806e+06	8.25484e+06	28155728	4.56378e+07	4.83509e+06	1.26891e+07	2.42944e+07	1.03112e+07	1.17181e+07	6.95481e+07	2.42353e+07	3.53576e+07
pos-3.401_631.26428	603053	827388	480394	628275	230384	2.40276e+06	2.46606e+07	3.34493e+06	240289	169984	313089	604957	149939	3.25539e+07	260479	1.40403e+06	265619	1.06289e+07	3.99614e+06	1.60718e+07	280161	422668	702378	172786	712335	2.26348e+06	5.86844e+06	343842	342120	378984	4.05942e+06	201970	2.25773e+06	5.41648e+06	1.78861e+06	1.00048e+06	338973	1.15385e+06	261146	220297	171499	1.44166e+06	2.08859e+06	1.83865e+06	488660	393376	5.55185e+06	745181	1.72383e+07
pos-3.403_209.10531	8.79449e+06	2.60969e+07	1.41347e+07	5.48302e+06	2.10349e+07	1.25299e+07	8.18695e+07	7.65037e+07	2.68148e+07	4.60385e+07	4.71135e+06	6.46649e+06	2.69108e+07	1.44439e+08	4.273e+07	3.27661e+07	4.61212e+07	4.39219e+07	1.08125e+07	1.34259e+07	5.43724e+07	4.6295e+06	3.85869e+07	1.74877e+07	8.16586e+06	4.02812e+07	5.09978e+06	3.50982e+07	1.14459e+08	2.00581e+08	2.85032e+06	1.7466e+07	9.93767e+06	5.41096e+06	4.03745e+07	3.89625e+07	6.94586e+07	1.26561e+07	4.2553e+07	2.55176e+07	5.31288e+06	4.11079e+07	5.44816e+07	4.43048e+07	5.64764e+06	3.87683e+07	1.01603e+07	1.46467e+07	1.00671e+08
pos-3.403_279.14733	1.55198e+06	1.10357e+06	1.49247e+06	760120	592900	1.81427e+07	757305	712753	1.5226e+07	1.10319e+06	1.1902e+07	550248	1.31209e+07	855077	619842	2.584e+07	683580	1.00596e+06	2.29465e+07	1.30166e+06	3.85315e+06	1.20139e+06	1.80759e+06	447588	1.16456e+06	707209	2.2099e+07	712029	880457	2.39954e+07	1.54195e+06	4.33999e+07	1.09762e+06	748058	1.50699e+06	4.95031e+06	1.56821e+06	830822	887062	620258	1.13062e+06	598533	914408	1.56632e+06	1.89191e+06	1.08652e+06	941925	1.44373e+06	1.12614e+06
pos-3.404_140.13135	683257	215251	544285	675470	261024	259717	315426	1.66476e+06	410688	1.72509e+06	354728	577751	169880	376447	692318	224009	300946	442874	722055	202282	317421	478882	795792	195766	288343	268191	356044	313471	387621	5.88534e+06	539970	228831	483227	329332	663453	326730	384055	340141	233364	249596	194308	263504	210791	452115	553651	445694	414682	414902	454918
pos-3.404_150.03175	2.53189e+06	1.81599e+07	2.91937e+06	5.43004e+06	6.4084e+06	1.42488e+07	3.59057e+06	1.40181e+07	2.76581e+07	2.62874e+07	2.47306e+06	1.26249e+07	1.49977e+07	1.85965e+06	7.14364e+06	1.48751e+07	5.25239e+06	1.86598e+06	3.2222e+06	1.15001e+07	9.97712e+06	4.64632e+06	4.82188e+06	2.09381e+07	2.17032e+07	1.59585e+07	1.44031e+07	6.08335e+06	3.12451e+06	1.49843e+07	3.26604e+06	1.97851e+07	3.73815e+06	1.04473e+07	7.43333e+06	6.43908e+06	1.13136e+07	6.13908e+06	4.9131e+06	2.25995e+06	7.14481e+06	1.02855e+07	1.36775e+07	1.02402e+07	3.25817e+06	3.69649e+06	5.32733e+06	3.40897e+06	4.94196e+06
pos-3.408_264.11113	3.28231e+07	1.84346e+07	1.20041e+07	3.70151e+07	3.42445e+06	1.18116e+07	1.53447e+06	1.42829e+07	1.63954e+08	351446705	7.79715e+06	1.89034e+07	1.9811e+07	1.84999e+07	4.10537e+06	7.43511e+06	2.69029e+07	5.38798e+07	9.37033e+06	1.47783e+07	3.17208e+07	2.39533e+07	4.12202e+07	1.46992e+06	5.62747e+07	2.20549e+07	2.55179e+07	5.86615e+06	2.01612e+06	2125917550	2.4608e+06	4.35593e+06	1.93668e+06	8.15397e+06	1.46074e+07	1.37932e+08	1.56799e+07	3.89287e+06	1.80514e+07	3.31477e+06	1.30763e+07	9.83643e+06	3.72752e+06	9.8985e+07	3.0069e+07	8.84943e+06	1.13549e+07	2.39836e+06	2.41283e+07
pos-3.409_298.14278	588064	191539	484327	508294	142978	181998	207053	279222	2.14168e+06	3.91169e+06	203097	210032	441596	281797	220017	209495	403534	1.2881e+06	320094	131149	1.53792e+06	307827	444854	476742	630065	259198	292122	236598	255369	2.8546e+07	480487	203623	311837	171267	338098	1.42362e+06	306500	162707	269513	219928	147549	184252	255157	1.57537e+06	492661	267053	369001	205175	404805
pos-3.41_252.11097	2.53049e+07	8.15496e+06	1.37901e+07	3.0044e+07	1.79415e+06	3.1341e+06	1.47328e+06	5.07571e+06	1.42107e+08	3.01088e+08	2.7909e+06	9.21525e+06	1.37873e+07	13697140	4.37333e+06	3.84877e+06	2.05531e+07	4.1762e+07	3.81258e+06	1.05319e+07	2.02795e+07	2.14047e+07	3.1585e+07	1.07317e+06	5.66545e+07	3.03889e+07	1.92051e+07	5.54993e+06	1.87707e+06	1810314649	922720	4.35594e+06	4.37816e+06	5.24764e+06	3.79773e+06	1.19319e+08	1.46386e+07	1.77021e+06	2.54353e+07	2.70062e+06	4.37469e+06	5.85189e+06	2.03524e+06	7.28617e+07	1.81845e+07	4.12209e+06	2.22002e+07	3.82341e+06	3.92387e+06
pos-3.41_297.14057	5.17741e+06	1.6976e+06	1.33901e+06	5.01636e+06	207151	599734	517642	965540	2.18805e+07	4.71294e+07	630062	1.31415e+06	2.18874e+06	2.32684e+06	418745	629973	3.79277e+06	6.91137e+06	775948	1.98253e+06	2.44765e+06	3.17011e+06	4.55655e+06	214233	8.17525e+06	3.41366e+06	3.12616e+06	939926	239128	3.00273e+08	228995	346330	299204	783484	876076	1.79294e+07	2.03111e+06	1.08954e+06	2.71999e+06	434117	776850	1.20054e+06	380571	1.23514e+07	2.81755e+06	998085	1.63371e+06	324411	2.44746e+06
pos-3.411_148.06864	3.29316e+07	1.90875e+07	3.20979e+07	4.75794e+07	7.83093e+06	1.25963e+07	1.2321e+07	2.05564e+07	1.69101e+08	3.55321e+08	1.49483e+07	1.66389e+07	3.28457e+07	1.90739e+07	7.33736e+06	1.48658e+07	3.20187e+07	6.17701e+07	9.20103e+06	1.99883e+07	3.68132e+07	2.40893e+07	4.15352e+07	2.06216e+06	6.30857e+07	2.37934e+07	4.04634e+07	1.42078e+07	9.888e+06	2143530385	1.33915e+06	2.85948e+06	1.60145e+07	2.25608e+07	8.11864e+06	1.37873e+08	3.16435e+07	5.85722e+06	3.03115e+07	1.26169e+07	1.63099e+07	1.44743e+07	2.27053e+06	1.04796e+08	3.2013e+07	1.56653e+07	2.21637e+07	9.83197e+06	3.78163e+07
pos-3.411_212.11616	8.58511e+06	3.55125e+06	6.27966e+06	1.72221e+07	7.99915e+06	5.0225e+06	5.18207e+06	3.47548e+06	5.96476e+06	2.17901e+07	4.54854e+06	5.1e+06	1.42063e+07	9.43964e+06	6.20395e+06	5.76456e+06	5.66814e+06	5.26134e+06	7.24799e+06	7.40795e+06	4.65328e+06	2.61948e+07	9.71485e+06	3.7514e+06	2.70854e+07	4.48574e+06	6.08768e+06	5.85562e+06	1.54912e+07	6.96885e+07	9.27367e+06	3.75591e+06	8.05815e+06	1.06807e+07	6.91313e+06	2.47773e+07	7.34289e+06	3.27693e+06	2.97401e+06	7.42274e+06	4.78393e+06	4.80984e+06	3.448e+06	6.32157e+06	4.66174e+06	3.70189e+06	4.83691e+06	3.96882e+06	1.28423e+07
pos-3.411_250.13205	3.79706e+06	4.91028e+06	2.59676e+06	9.77174e+06	2.18364e+06	3.91458e+06	3.30832e+06	8.91012e+06	1.23177e+07	2.8885e+07	1.84917e+06	4.39563e+06	3.29775e+06	2.54016e+06	3.96582e+06	6.09807e+06	3.70133e+06	7.11192e+06	3.46486e+06	6.34356e+06	6.59595e+06	3.22763e+06	5.89075e+06	1.0035e+07	8.27442e+06	9.77151e+06	2.74035e+06	4.6241e+06	3.34425e+06	1.26586e+08	3.11929e+06	3.89037e+06	2.98191e+06	2.13175e+06	3.00192e+06	1.10589e+07	4.85106e+06	3.0141e+06	2.74363e+06	1.37377e+07	2.92877e+06	1.80419e+07	3.22482e+06	8.17485e+06	4.50418e+06	2.55895e+06	7.25965e+06	1.68033e+06	1.71515e+07
pos-3.411_296.13744	3.15652e+07	1.80012e+07	1.07416e+07	3.40845e+07	2.11475e+06	1.13335e+07	2.4889e+06	1.21391e+07	1.63102e+08	3.50751e+08	6.06899e+06	1.54933e+07	1.9277e+07	1.78069e+07	7.14471e+06	6.93185e+06	2.63489e+07	5.25762e+07	2.32245e+07	1.40616e+07	3.03633e+07	2.30386e+07	3.97552e+07	3.3829e+06	5.38473e+07	2.68624e+07	2.45707e+07	5.78127e+06	1.5942e+06	2124162156	2.43351e+07	1.09818e+06	2.45525e+06	7.54204e+06	6.96462e+06	1.36828e+08	1.47715e+07	2.24452e+06	1.70262e+07	4.09984e+06	8.08192e+06	8.81222e+06	925470	97058584	2.261e+07	7.96879e+06	9.51653e+06	2.88745e+06	2.24015e+07
pos-3.414_125.06605	2.8407e+06	1.70544e+06	1.51963e+06	3.02879e+06	1.27203e+06	1.01005e+06	762418	1.7433e+06	9.5687e+06	2.49854e+07	2.64562e+06	3.98676e+06	1.73654e+06	1.56792e+06	2.84118e+06	3.59726e+06	5.71029e+06	4.32505e+06	2.21978e+06	4.12052e+06	2.44609e+06	2.29121e+06	3.69877e+06	7.17928e+06	4.76887e+06	8.69285e+06	1.64783e+06	2.76866e+06	1.80389e+06	1.04069e+08	1.2739e+06	1.19667e+06	1.78335e+06	1.04744e+06	1.91659e+06	8.70271e+06	3.5744e+06	1.08748e+06	2.00023e+06	6.69647e+06	759510	4.82073e+06	3.64424e+06	9.42867e+06	2.49572e+06	1.85299e+06	5.94333e+06	1.23495e+06	1.30615e+07
pos-3.414_167.09469	1.65587e+06	2.84964e+06	1.18584e+06	1.30038e+06	2.13358e+06	1.68769e+06	7.29827e+06	7.97663e+06	4.3371e+06	9.79065e+06	849818	1.35311e+06	2.98403e+06	1.55846e+07	3.80025e+06	1.65851e+06	5.76812e+06	5.70221e+06	1.72212e+06	1.54812e+06	2.09515e+06	913398	5.54371e+06	1.56838e+06	1.38642e+06	4.52257e+06	1.25934e+06	4.29828e+06	1.14944e+07	4.36628e+07	2.2249e+06	1.32011e+06	1.08054e+07	1.75355e+06	5.03655e+06	6.71336e+06	8.21534e+06	1.626e+06	4.3724e+06	2.72845e+06	1.90714e+06	4.94176e+06	3.86364e+06	3.78476e+06	2.21919e+06	2.92418e+06	1.60675e+06	697152	1.10283e+07
pos-3.414_648.33768	648111	1.63198e+06	784102	2.38288e+06	243882	294645	1.17913e+06	2.70589e+06	880976	6.88433e+06	987816	8.70768e+06	876870	456216	1.4804e+07	2.66775e+06	5.39235e+06	568538	714510	750537	1.461e+06	3.16319e+06	1.14643e+06	970172	3.74462e+06	2.99596e+06	876825	822389	413430	1.0029e+07	777886	5.32253e+06	1.11266e+07	5.00394e+06	5.37115e+06	2.33754e+07	1.94182e+06	1.21479e+06	1.29545e+06	1.4351e+07	7.27797e+06	4.42321e+06	2.34539e+06	3.01039e+06	1.41102e+06	1.02693e+06	1.49452e+06	1.30417e+06	2.97495e+06
pos-3.415_295.14223	575755	760633	429081	1.23662e+06	700440	3.74546e+06	297785	271379	2.33695e+06	4.07053e+06	873686	586606	1.76139e+06	405283	525320	1.33549e+06	290317	1.21482e+06	460362	1.27438e+06	1.1183e+06	1.00177e+06	5.9355e+06	332018	920717	502204	3.59722e+06	235423	451767	3.02167e+07	323516	1.07277e+06	705481	246317	486255	1.88173e+06	613654	458024	537254	360025	577672	376290	269765	1.58188e+06	611084	384078	908936	328522	682719
pos-3.422_173.08441	488865	647147	517156	609657	357213	696770	462819	612855	359755	598215	369786	1.46957e+06	459052	405697	240931	913012	338754	342673	660305	1.26327e+06	1.25465e+06	2.11399e+06	564362	351543	670812	365819	288737	326534	720356	476756	299904	681188	618022	458826	398605	409279	407970	405149	418765	470967	1.779e+06	368726	420540	399450	387079	371292	589977	638194	858241
pos-3.439_180.09012	1.64637e+08	7.16374e+06	1.35499e+07	1.11333e+07	5.72425e+06	9.6415e+06	5.16506e+06	6.68177e+06	1.43534e+07	2.2589e+07	3.22475e+07	3.10311e+06	9.02968e+06	1.4441e+07	6.29368e+07	6.87631e+06	6.98224e+07	3.1363e+06	7.75751e+06	3.7701e+06	1.2466e+07	2.34558e+07	8.58819e+06	7.19265e+06	9.30288e+06	5.60667e+06	7.66899e+06	6.67508e+06	8.0925e+06	6.76927e+07	4.62335e+06	1.36104e+07	4.60367e+06	9.22979e+06	6.60273e+07	3.93974e+06	5.48386e+06	5.194e+06	2.9239e+07	5.59184e+07	5.67425e+06	8.19921e+06	3.63406e+06	8.71126e+06	6.25763e+06	6.96559e+06	7.07145e+06	8.5979e+06	6.1388e+06
pos-3.46_148.0525	9.01287e+06	7.35313e+06	4.97485e+06	7.5715e+06	5.93201e+06	4.77756e+08	3.63714e+07	7.12845e+06	7.13336e+06	6.28496e+06	4.73577e+06	5.89907e+06	9.08385e+07	6.12309e+06	1.18765e+07	3.07518e+08	8.63781e+06	9.09357e+06	1.18777e+07	5.84232e+06	1.15754e+07	1.05729e+07	1.60459e+07	8.31999e+06	7.8732e+06	8.31835e+06	4.01218e+06	8.26161e+06	7.16276e+06	174954145	1.08229e+07	8.05556e+06	3.02679e+07	1.94667e+07	1.13372e+07	8.71579e+06	1.1454e+07	6.51837e+06	5.04954e+06	4.84867e+06	5.97394e+06	3.547e+06	5.80882e+06	2.62335e+08	1.15191e+08	5.94751e+06	8.35819e+06	8.36858e+06	1.15336e+07
pos-3.463_384.16927	1.75928e+06	606448	764537	465075	1.43212e+06	222949	3.97701e+06	410679	1.33475e+06	317947	1.49552e+06	805378	1.57171e+06	425658	2.88898e+06	1.26753e+06	1.9137e+06	430050	1.07639e+06	611866	747873	423228	1.66932e+06	526001	383842	1.34325e+06	3.43615e+06	1.31389e+06	3.05362e+06	499870	1.45002e+06	247612	3.04051e+06	214998	1.01228e+06	333400	891435	210570	382092	2.04334e+06	225473	840581	1.67895e+06	979426	359124	3.06877e+06	998884	505913	436284
pos-3.465_250.16821	982668	890842	1.86464e+06	3.26395e+06	401628	621412	804761	1.55526e+06	2.0001e+06	832549	1.37127e+07	1.43723e+06	764921	1.12078e+06	574865	476975	708509	1.43777e+06	802062	912460	743346	1.22562e+06	577142	452445	1.90587e+06	924174	1.37103e+06	1.01882e+06	3.02141e+06	552917	1.16746e+06	2.76954e+06	940373	403169	938575	1.31305e+06	766029	607257	597128	420264	472469	659221	2.15759e+06	5.40636e+06	914671	566278	819465	646198	1.42407e+07
pos-3.466_669.32427	1.39553e+06	280726	522715	346230	2.29544e+06	303508	332299	288590	2.90793e+06	296002	2.59442e+06	249086	1.61222e+06	868661	4.03723e+06	265742	329425	299009	365133	388552	318195	327425	362433	243037	269012	1.80225e+06	277266	1.89715e+06	253145	507683	866491	234314	1.15101e+06	394650	259340	373910	1.94809e+06	286656	2.47034e+06	2.30931e+07	211038	1.95831e+06	526670	367614	713700	687558	346004	296390	435557
pos-3.475_314.1349	225571	133427	239916	155823	227643	8.38125e+07	152519	160855	116264	593768	161008	123903	1.13643e+07	166702	110357	4.21222e+07	120192	140439	1.72329e+06	178338	124225	773673	604171	116083	117828	121503	1.10604e+06	113220	160002	2.80851e+07	324652	503890	176817	134337	119032	247428	160214	2.57946e+06	124357	127206	1.04793e+06	854978	97193.8	4.11971e+07	128696	192906	158809	136038	210584
pos-3.477_393.14246	188742	592045	237839	491263	304625	1.55579e+06	1.18809e+06	818332	2.84192e+06	297390	159614	489951	352861	165259	364419	867798	230228	218139	1.86353e+06	176794	519217	148980	175419	378179	283452	321538	197080	156448	127225	350111	321840	106614	175286	133173	512045	127252	1.13488e+06	130430	1.04249e+06	526014	170664	195932	745379	2.0535e+06	1.41033e+06	423418	157434	226619	208760
pos-3.48_323.08296	148293	103924	167736	112706	98990.9	160470	103686	125288	260667	101831	781738	96506.8	1.05127e+06	129842	743234	189715	231463	109386	3.26253e+07	138905	102401	117053	367715	693507	91775.1	111380	420146	3.56796e+06	99959.4	215973	3.20651e+06	80839.4	367168	100463	215052	233231	116709	89949.2	93848.2	100765	79583.5	98112.4	75703.1	131420	97720.4	150252	123695	105813	164021
pos-3.485_187.15736	435871	6.99968e+06	5.63424e+06	373245	299983	1.24367e+06	2.15365e+06	1.08615e+07	424991	825374	1.23626e+06	7.94518e+06	360648	3.39769e+06	1.67649e+06	659182	275163	4.99822e+06	691195	432232	6.3145e+06	509359	531842	265756	2.30346e+07	3.06705e+06	562837	329294	1.17453e+07	336684	601237	474815	488607	295288	4.73758e+06	247267	953457	3.47461e+06	366088	296176	2.9924e+06	7.34792e+06	221088	1.49838e+06	419408	869137	3.86951e+06	510334	1.41595e+07
pos-3.486_425.18043	320054	236242	381299	239176	232005	246650	235700	284806	197224	793605	276669	219381	194648	295160	212016	228997	212810	248658	295560	305947	502405	256383	313306	827846	334197	253191	205195	213973	227229	778388	320559	375412	355998	228374	191825	217540	460714	204474	213337	490624	180910	223030	802362	436277	222139	341554	281184	240449	372855
pos-3.49_544.2687	743472	1.65493e+06	814384	2.82586e+06	1.55558e+06	5.53629e+06	1.16938e+07	3.36312e+06	338231	2.02543e+06	1.4831e+06	191838	814065	3.04105e+07	3.63835e+06	1.70141e+07	972518	1.6105e+07	2.80418e+07	619132	517297	328695	4.99256e+06	650958	332080	1.64087e+07	5.80305e+06	2.36639e+06	1.28806e+06	436070	5.90916e+07	4.31163e+06	551830	5.32253e+07	814016	1.11671e+06	463238	576616	678398	317707	226430	1.67947e+06	6.1609e+06	2.14761e+06	477621	1.66759e+06	4.49604e+06	9.60191e+06	981022
pos-3.492_317.67642	195158	672224	253833	303833	275492	214242	353742	173665	264120	284763	353921	135205	622705	179979	142322	166342	129764	151623	180223	913851	578146	157875	316184	277174	187992	154388	125121	131684	138557	357431	195466	203623	413646	139255	222931	239946	213163	177239	130086	423831	1.23025e+06	135997	322724	394356	135453	188485	649543	354683	410317
pos-3.5_602.29171	265348	203096	1.59588e+06	1.10449e+06	1.29743e+06	311371	4.2505e+06	192396	304493	299232	481081	304331	816755	1.43957e+06	422938	793460	398427	514824	1.81038e+07	253653	192991	437410	1.27654e+06	284389	332872	672051	450430	259099	171109	274145	731651	255842	259556	742051	165066	192830	341624	428452	523640	253417	166066	163357	142318	805630	196091	258275	572110	960619	594988
pos-3.506_490.1593	158514	692679	240600	321758	272164	470596	137249	203996	944132	265484	337346	626118	315712	117264	401439	547600	305957	118046	162810	260004	133863	149644	447608	210925	185653	499438	431672	327082	119286	234997	137876	113632	153580	127467	188497	1.32389e+06	1.34538e+06	122497	174897	129608	115771	234279	1.29019e+06	430971	443779	180053	452827	140586	165347
pos-3.513_199.16871	264094	240861	409301	3.10395e+08	2.13279e+07	2.68093e+06	233484	214291	315003	750820	977844	412273	2.71124e+06	263657	158786	792403	194464	198166	276968	4.93012e+07	416592	1.71206e+07	272628	190911	210564	186743	190973	197314	202926	1.69606e+06	202864	193308	26428428	1.55773e+06	181249	184382	230784	6.04504e+07	195708	355346	1.54168e+06	192660	6.42959e+06	1.90334e+07	232553	306300	446839	9.20031e+07	267733
pos-3.513_213.04621	4.63278e+06	7.47794e+06	1.04329e+07	717994	6.0019e+06	7.96927e+06	4.02687e+06	4.71556e+06	454494	455087	498689	223997	7.73444e+06	721494	4.10173e+06	9.20373e+06	1.88387e+06	566383	447054	1.39582e+07	1.13064e+07	857176	1.70641e+06	2.69249e+06	8.12879e+06	1.31191e+06	440162	5.4045e+06	1.5918e+07	471729	1.00687e+06	2.59313e+06	309064	1.14797e+06	2.76643e+06	5.94683e+06	7.58495e+06	422746	4.77779e+06	650200	323427	308692	220932	584453	5.06111e+06	508215	2.33878e+06	1.30045e+06	9.25217e+06
pos-3.516_240.19533	129411	128157	190754	2.50054e+08	2.07297e+07	2.56621e+06	114412	105007	103783	455075	838341	296831	2.45931e+06	163139	77808.2	683136	95290.9	97105.1	135720	4.17931e+07	204900	1.31168e+07	146284	102717	103180	101900	93580.6	96687.9	99437.5	1.53853e+06	112646	112084	2.62463e+07	1.39664e+06	88815.5	97307.9	113089	4.33058e+07	95900.7	95054.1	1.38409e+06	94407.1	6.30204e+06	1.86893e+07	113955	145701	327600	8.77696e+07	131195
pos-3.518_101.11968	135901	134584	200320	2.50054e+08	2.07297e+07	2.56621e+06	120149	110273	110509	477897	838341	296831	2.45931e+06	163139	81710.2	683136	100070	101975	142526	4.17931e+07	215176	1.26391e+07	153620	107868	108355	107011	98273.6	101537	104424	1.53853e+06	118295	117705	2.62463e+07	1.39664e+06	97124.8	102188	118760	4.33058e+07	100710	99821	1.38409e+06	107636	6.36358e+06	1.86893e+07	119670	153007	327600	8.77696e+07	137774
pos-3.518_406.18809	2.77186e+06	202626	497739	195532	3.66777e+06	194931	180893	248705	166379	176526	1.65392e+06	177712	1.67918e+06	590415	710143	1.09375e+06	1.5446e+06	552061	5.68482e+06	180309	218006	187497	3.16574e+06	936724	163135	830060	8.17298e+06	4.38435e+06	157218	145371	3.28278e+06	177213	460313	366110	521440	326900	179134	738346	5.03811e+06	2.43374e+06	457368	162054	546069	252739	3.97178e+06	279937	199949	185291	213481
pos-3.521_469.19687	2.77186e+06	174226	834504	168127	3.66777e+06	167610	155539	142753	143059	150617	1.65392e+06	152804	1.67918e+06	590415	710143	975444	1.5446e+06	552061	5.68482e+06	155037	187450	161218	3.16574e+06	936724	169743	830060	8.17298e+06	4.38435e+06	135182	124996	3.28278e+06	152375	181810	314797	521440	326900	154027	738346	5.03811e+06	2.43374e+06	457368	139341	469533	217316	3.97178e+06	240701	171924	159321	183560
pos-3.535_641.37538	917354	474840	389586	1.2337e+06	780981	2.65316e+06	758627	1.32688e+06	1.77546e+06	885057	1.31052e+06	1.04361e+06	1.85316e+06	290126	1.08529e+06	1.32977e+06	753876	264770	250169	1.30217e+06	1.03964e+06	1.78796e+06	1.33837e+06	9.31643e+06	7.10216e+06	894193	568551	903270	1.47668e+06	1.35483e+06	8.35466e+06	996753	372726	459447	2.26017e+06	616461	424364	265885	957979	624737	2.07802e+06	1.20111e+06	1.6935e+06	4.6075e+06	4.32153e+06	1.99748e+06	1.39561e+06	2.95922e+06	4.43315e+06
pos-3.539_319.2001	1.04655e+06	3.15222e+06	1.44485e+06	1.03287e+07	1.62746e+06	4.77592e+06	558567	691765	3.35948e+06	472332	1.91208e+06	6.07122e+06	857773	1.02451e+06	498118	3.26779e+06	592949	6.96375e+06	1.96818e+07	1.09015e+06	4.82876e+06	2.95156e+06	868627	742953	6.96914e+06	428267	881271	1.66522e+06	540057	2.45645e+06	1.25911e+06	537473	2.60602e+06	302401	826223	576158	1.36736e+06	533538	1.38271e+06	1.0431e+06	2.13125e+06	931376	743801	2.65137e+06	350478	2.76858e+06	441018	5.44418e+06	3.11999e+06
pos-3.541_283.06946	145374	886605	165461	193934	102197	212720	106334	114418	152709	251262	144982	133802	194464	93176.8	87583.1	117613	101927	109235	124676	144070	481354	295872	165085	133044	109898	179121	105822	111686	99446.8	2.40741e+06	120485	106609	138126	112246	108393	86015.7	126217	132274	101623	100813	160746	93581.6	85169.1	182180	460105	163158	140883	142096	153145
pos-3.541_327.18376	1.68441e+06	1.14791e+06	2.1553e+06	1.01987e+06	1.89201e+06	1.28518e+06	1.06856e+06	697149	282004	307257	1.48369e+06	7.78617e+06	2.259e+06	2.17676e+06	2.16454e+06	707178	924150	1.01931e+06	4.09833e+06	1.33192e+08	3.99188e+08	9.70739e+06	3.14233e+06	671053	1.94883e+06	1.4065e+06	1.32688e+06	860018	316502	1.52764e+06	2.54872e+06	1.1684e+06	2.80417e+07	895321	1.52031e+06	1.20671e+06	487334	1.26132e+08	2.07907e+06	2.459e+06	1.28182e+06	1.39769e+06	645406	1.45633e+08	1.1273e+06	1.4963e+06	1.41855e+06	1.03619e+06	1.02489e+06
pos-3.546_521.23765	219906	471904	257515	1.81926e+06	384563	234080	161443	173078	841291	201672	219312	345425	182349	140947	172648	177911	154184	165239	268429	207053	1.06451e+06	189621	249723	186572	166241	280889	444925	443494	320265	155120	182256	161266	208941	169793	380616	130115	389476	285852	153723	201593	559857	187711	164136	275581	430788	246807	213112	214948	231661
pos-3.555_278.19977	696357	326424	169282	416268	222622	449317	351378	415590	233362	2.12269e+07	457774	697019	341396	138795	516666	400512	849817	165516	3.18178e+07	1.62816e+06	4.81776e+06	6.60001e+06	677999	409248	1.14427e+06	2.38882e+06	353839	353608	664792	637542	468172	1.77065e+07	214217	2.91254e+06	1.28117e+06	2.00532e+06	251676	385093	279288	671528	507200	3.24137e+06	3.38329e+07	563755	1.49293e+06	526396	800604	141299	537683
pos-3.567_520.25048	144394	138694	181409	220989	155782	164900	113730	1.04314e+06	1.19732e+06	739493	666835	2.00136e+06	124323	1.60756e+06	188011	1.64772e+06	229838	334802	318114	1.07241e+06	2.47282e+06	358672	151754	273223	294137	266888	1.04616e+07	332160	481589	189608	112710	2.63875e+06	460817	179246	1.32429e+06	2.57034e+06	559367	145858	96920.6	597351	613296	377184	83624.3	1.41215e+06	2.97313e+06	511013	111796	779644	207173
pos-3.578_423.21218	241376	648303	290281	765072	167335	214003	195110	2.02503e+06	174832	1.97724e+06	214698	228551	729473	2.96546e+06	144486	938252	233316	527226	3.50173e+06	317896	734596	497306	635479	187299	245410	1.25144e+06	169502	1.0923e+06	149032	2.4847e+07	334896	384450	2.35472e+06	147139	1.31168e+06	4.3688e+06	1.82303e+06	123107	911669	239013	193517	1.30346e+06	333560	2.12897e+06	901555	261676	511028	190313	2.28792e+06
pos-3.579_211.60614	254227	240933	305736	743297	176959	286760	206333	333629	303304	1.99606e+06	282424	261858	196630	259631	163619	939150	237560	527226	3.50313e+06	297552	769548	498585	637384	366379	307254	830899	1.04254e+06	1.22753e+06	156966	2.44108e+07	276963	1.0059e+06	282300	154973	1.31833e+06	4.24723e+06	1.81896e+06	129662	247160	430639	301195	1.31044e+06	352494	2.12897e+06	807533	275608	361250	436952	662851
pos-3.586_261.17325	3.61894e+06	6.04528e+06	2.71724e+06	1.33766e+07	2.12896e+06	6.44053e+06	2.95748e+06	1.08683e+07	1.97448e+06	2.58259e+07	3.37264e+06	1.76093e+07	3.05735e+06	1.07087e+06	1.62609e+06	2.86394e+06	1.49785e+06	2.0719e+06	3.26679e+07	1.12002e+07	1.43958e+07	2.76094e+07	7.89867e+06	3.86835e+06	9.33544e+06	5.44701e+06	2.20835e+06	5.16263e+06	8.49382e+06	4.50796e+06	8.65374e+06	2.51345e+07	2.72098e+06	5.39906e+06	2.99755e+06	5.21247e+06	2.89762e+06	3.78436e+06	9.48104e+06	5.63847e+06	7.20142e+06	1.13288e+07	3.79733e+07	4.36253e+06	4.96977e+06	3.74013e+06	6.92746e+06	2.83696e+06	6.39599e+06
pos-3.589_324.08479	143852	138900	1.58996e+06	130366	110385	181243	133424	92362	128300	101945	183781	124752	270324	127953	85073.4	189715	93650	102643	4.35526e+07	90129.4	101368	124470	191319	91777.4	98176.5	92120.3	1.68745e+07	557019	82855.4	180136	695052	128586	129585	113139	215052	1.81682e+06	97639.2	74819.5	102024	92852.7	89461	79309.7	79693.1	123664	114709	156964	112387	115558	132654
pos-3.598_559.32123	529909	122227	3.39322e+06	358536	98345.3	111833	164714	1.66928e+06	1.49095e+06	858090	941811	2.19403e+06	193335	2.64675e+06	968749	2.22408e+06	644948	1.76093e+06	276996	1.46058e+06	3.97094e+06	205435	138186	250415	539271	569933	1.15007e+07	881956	274343	658246	525038	3.1777e+06	972303	769902	2.30036e+06	3.87866e+06	1.14872e+06	178523	141332	1.39609e+06	1.76655e+06	945800	239131	1.80615e+06	4.44975e+06	1.1094e+06	102333	2.62385e+06	436417
pos-3.599_280.21536	115798	105469	117670	428326	89965.4	102304	96163.1	375026	170595	4.65896e+06	109852	439468	97748.7	103000	102087	79459.9	188351	222870	4.17062e+06	249937	836445	1.4776e+06	525001	302685	1.20224e+06	1.01253e+06	92916.2	141874	214077	357418	111193	3.26684e+06	133592	167753	90094.4	81058.2	262277	60228.4	156617	90608.7	514791	419500	7.32436e+06	111269	1.36472e+06	422618	346302	90020.1	468145
pos-3.601_297.08511	165158	1.2587e+06	215741	3.60061e+06	578573	295312	113408	632561	4.54897e+06	4.92948e+06	661787	457065	666174	113466	199564	105936	571138	3.28918e+06	135545	331974	7.23906e+06	1.61722e+06	803807	308236	269780	4.10925e+06	1.79147e+06	99529.4	343623	5.04338e+06	122492	264985	114914	460525	177178	403836	401080	85068.9	1.09032e+06	98014.6	836137	2.38848e+06	141142	2.58705e+06	806278	2.01641e+06	503703	367191	624009
pos-3.605_264.11297	372435	5.16128e+06	423495	325711	579910	2.06544e+07	5.74743e+07	2.22388e+07	981706	819103	1.87738e+06	326404	1.88872e+06	1.36707e+08	1.32262e+07	6.1935e+07	485066	8.03022e+07	4.96942e+07	6.28824e+07	335374	238943	324235	3.15877e+06	203431	5.47393e+07	3.06592e+07	905604	2.77426e+06	400725	1.55888e+08	1.04912e+07	737907	114104139	2.92201e+06	1.9922e+06	672588	2.47235e+06	856155	261706	305886	1.62182e+07	1.66886e+07	8.07386e+06	225809	6.7819e+06	4.39196e+07	2.02354e+07	4.34817e+07
pos-3.605_545.25256	1.0784e+06	4.0912e+06	6.68882e+06	129787	399001	2.00456e+07	5.73541e+07	2.2125e+07	571169	303842	1.71802e+06	192057	1.65357e+06	1.36562e+08	1.29876e+07	6.17555e+07	137972	8.01829e+07	4.95202e+07	6.27769e+07	184981	101194	255383	3.18654e+06	86154	5.36595e+07	3.05278e+07	725003	2.55654e+06	137031	1.55724e+08	1.03749e+07	590380	1.13975e+08	2.82691e+06	1.8414e+06	180639	2.49539e+06	1.62729e+06	137218	113559	1.60451e+07	1.65967e+07	7.65664e+06	95631.3	6.6015e+06	4.37872e+07	2.01053e+07	4.33289e+07
pos-3.608_252.11293	200103	4.0912e+06	237168	211676	399001	2.00456e+07	5.73541e+07	2.2125e+07	680764	303842	1.71802e+06	178923	1.65357e+06	1.36562e+08	1.29876e+07	6.17555e+07	378450	8.01829e+07	4.95202e+07	6.27769e+07	177722	626438	215157	3.05325e+06	444878	5.36595e+07	3.05278e+07	777827	2.66371e+06	238870	1.55724e+08	1.03749e+07	590380	1.13975e+08	2.82691e+06	1.8414e+06	268372	2.49539e+06	740005	142950	118302	1.60451e+07	1.65967e+07	7.94145e+06	99625.6	6.6015e+06	4.37872e+07	2.01053e+07	4.33289e+07
pos-3.611_254.21079	115817	108911	139840	3.17198e+07	527494	110270	82364	77945.8	82964.9	81057.4	109219	101078	94746.3	88515.7	66824.4	75534.1	61026.8	84032.6	119263	1.76966e+06	95556.7	245060	117414	72321.8	76876.2	72432	84166.8	87573.5	67223.9	83058.2	111938	79683.7	239136	74190.7	61254.4	69206	78256.5	2.96708e+06	72985.2	79743.5	106401	59144.6	154196	728960	85332.9	123642	90737.9	4.14017e+06	104711
pos-3.612_237.064	2.17908e+06	2.04346e+06	1.19134e+06	3.23977e+06	1.62637e+06	1.84179e+06	2.31975e+06	3.35199e+06	3.29623e+06	3.40368e+06	3.03555e+06	2.24781e+06	3.56848e+06	1.8084e+06	1.97615e+06	2.89342e+06	2.12035e+06	4.16072e+06	1.44369e+06	1.28792e+06	2.67939e+06	1.09073e+06	2.79999e+06	2.04152e+06	2.40547e+06	2.86547e+06	4.14066e+06	3.45341e+06	1.15925e+06	1.86825e+07	2.43163e+06	4.10377e+06	3.56306e+06	1.83984e+06	1.82885e+06	3.14773e+06	2.17124e+06	3.10683e+06	2.68189e+06	3.60804e+06	1.40583e+06	1.85326e+06	1.98351e+06	2.23696e+06	2.73973e+06	3.92441e+06	2.00848e+06	919926	1.7213e+06
pos-3.612_467.2425	3.71728e+07	484037	1.53761e+07	399439	7.82533e+06	765854	4.95614e+06	1.78656e+06	1.04762e+06	1.35815e+06	9.07265e+06	900098	1.14048e+07	2.02611e+06	6.26844e+06	1.56704e+06	1.45178e+07	2.79646e+06	1.7657e+07	342191	549967	445315	2.74409e+07	3.6557e+06	419463	3.44627e+06	7.39296e+07	4.47802e+07	1.19742e+06	571481	1.0568e+08	830462	3.37939e+06	1.02421e+07	1.25916e+07	4.25307e+06	970188	1.09842e+07	2.79076e+07	9.8827e+06	524266	1.69161e+06	2.61933e+06	1.86702e+06	6.34441e+06	7.02078e+06	977191	2.25273e+06	794375
pos-3.613_269.09031	230043	327493	179551	692159	245729	274069	128861	179701	606919	581082	254863	326594	153029	95988.1	139036	738873	220358	262921	256106	170921	1.04537e+06	479074	626244	80074.1	357746	412584	677059	143671	127250	1.69193e+07	142266	254400	1.94255e+06	79693	170274	280144	298637	201147	192047	167128	658258	290086	104432	439254	337245	315592	262076	96781.9	490385
pos-3.613_646.26364	135657	127568	163795	8.27138e+06	102140	3.13638e+06	2.4011e+07	6.11668e+06	92569.8	94942.6	179644	268559	142243	4.36553e+07	869170	7.89166e+06	71480.7	1.54823e+07	2.76753e+07	4.76999e+06	111926	190514	137528	128027	144871	3.66909e+06	2.93212e+06	102575	175025	97286.2	1.94909e+07	1.46768e+06	172826	1.32669e+07	71747.3	167205	91661.9	68549.8	85487.6	93403.7	71386.6	924813	634662	1.27114e+06	155335	179626	9.04758e+06	2.388e+06	5.2923e+06
pos-3.621_530.2379	9.09844e+06	136691	886779	612221	96822.4	2.0311e+06	3.32128e+06	692418	99190.1	114568	555671	126860	167698	1.92342e+07	3.53316e+06	9.09441e+06	80588.8	1.09044e+07	1.63005e+07	635238	148411	499664	187379	349284	526961	6.5937e+06	2.24919e+06	132877	532161	116524	2.93714e+07	782798	122284	1.97952e+07	81696	118595	136709	1.1267e+06	81834.3	85479.7	81327	333522	1.32492e+06	1.28468e+06	97774.6	1.08067e+06	1.02047e+07	3.9417e+06	288009
pos-3.623_150.03188	1.56677e+06	1.79073e+06	1.46638e+06	1.80224e+06	2.05279e+06	1.0424e+06	1.7417e+06	1.38556e+06	1.24452e+06	1.23272e+06	2.56785e+06	1.6414e+06	891533	1.50507e+06	1.38427e+06	1.08015e+06	1.38649e+06	2.14623e+06	2.17866e+06	1.60077e+06	3.31599e+06	1.65306e+06	1.76844e+06	1.77985e+06	1.6222e+06	1.51658e+06	2.09469e+06	2.42789e+06	1.31876e+06	1.2774e+07	2.93485e+06	1.8017e+06	1.85071e+06	2.38783e+06	1.08148e+06	1.23301e+06	1.76216e+06	814369	1.7974e+06	1.81995e+06	1.71345e+06	1.91708e+06	1.94837e+06	1.61876e+06	2.53325e+06	2.37437e+06	1.39157e+06	1.09129e+06	1.39013e+06
pos-3.623_531.23697	1.10969e+07	147203	1.28011e+06	1.94556e+06	343275	9.78926e+06	2.56643e+07	4.35251e+06	467248	123378	1.2583e+06	136616	778609	9.9227e+07	8.12121e+06	4.60236e+07	209045	4.76543e+07	7.28155e+07	1.87216e+06	113247	121375	361570	1.82873e+06	192371	3.12146e+07	1.05514e+07	180241	997536	258977	1.38842e+08	2.44374e+06	697655	8.95831e+07	314020	326166	297171	3.41089e+06	613897	399614	87581.5	1.90781e+06	4.66905e+06	4.41651e+06	105294	5.74397e+06	4.40705e+07	1.56611e+07	694382
pos-3.624_167.05829	808628	1.0103e+06	667626	148692	1.1933e+06	191636	698438	1.01796e+06	227861	612065	471310	276995	151545	459050	296348	920224	1.16859e+06	1.25532e+06	1.16476e+06	973269	2.20192e+06	1.09983e+06	1.24596e+06	1.00734e+06	883432	356381	1.30867e+06	1.54223e+06	197889	1.21418e+07	1.01051e+06	1.33243e+06	831620	228858	214583	333784	985233	181166	842547	1.1488e+06	1.13597e+06	1.33095e+06	1.29268e+06	1.12175e+06	1.54195e+06	180490	888089	156511	910982
pos-3.625_425.24178	670561	1.64731e+08	1.78706e+06	2.41694e+06	933596	582618	437933	1.02345e+06	660884	1.18032e+06	599844	3.00101e+06	6.10892e+06	1.26434e+06	1.1608e+06	1.93433e+06	275145	1.19416e+06	1.09878e+07	1.05288e+06	2.22431e+06	724588	1.05798e+06	563971	1.64428e+06	2.79267e+06	831524	756085	837916	1.01346e+06	2.3814e+06	2.05076e+06	530092	326732	2.46973e+06	2.65891e+06	898173	327519	4.22568e+06	2.55778e+06	2.06559e+06	1.31647e+06	1.62507e+06	2.33488e+06	6.36258e+06	529811	541052	2.06703e+06	2.00576e+06
pos-3.628_993.49411	1.08048e+07	201014	3.11177e+06	231601	2.42842e+06	422619	574427	583796	897818	225064	617350	253635	2.00027e+06	293481	757472	487644	1.95167e+06	1.54945e+06	4.04511e+06	258114	109581	247845	5.89108e+06	219424	219329	759638	1.43701e+07	9.99413e+06	130222	1.8052e+06	2.22585e+07	228217	122814	1.10582e+06	1.57214e+06	1.07631e+06	83628.7	1.26124e+06	781897	536807	1.61649e+06	340827	175798	230073	1.59735e+07	508445	544637	301844	121388
pos-3.633_143.99803	140913	124321	162812	113108	140541	144011	94139.4	85666.5	156133	93138.8	119798	113456	161864	94456	578555	123555	77785.5	94176.6	105828	82339	105314	238101	123333	80093	98518.3	80304.1	88168.6	87638.5	104286	124740	113628	87955.4	116704	86094	78854.2	67682.6	289654	69463.2	85091.4	82506.3	80194.8	3.48246e+06	512674	111760	91269.3	359244	93521	97400.2	116660
pos-3.634_197.98532	394141	339928	439891	316368	448508	402807	328289	239613	542379	260514	335081	317342	452743	264198	1.27591e+06	268328	217570	263417	296006	230306	294568	640549	344970	224024	286072	224615	246612	239919	262150	348904	317823	246016	326428	240809	220559	189559	511736	194292	238005	230774	224309	7.50203e+06	1.04783e+06	318689	255285	865956	261583	272433	321984
pos-3.641_141.11554	521601	606312	1.10852e+06	799240	644387	651658	530034	534900	584649	6.21961e+06	517867	601469	569558	627963	513248	550934	733850	787590	6.24264e+06	457165	3.18867e+06	879352	1.3892e+06	604963	615062	1.03484e+06	547213	839191	573447	577106	1.02286e+06	3.79347e+06	600672	792418	694653	447072	672872	859975	511228	579199	625542	1.47045e+06	7.17941e+06	431027	1.97902e+06	589980	519129	414714	895487
pos-3.645_616.28967	125265	156189	699884	1.36509e+07	331754	3.232e+06	1.37969e+07	6.38833e+06	143506	134531	389793	672593	167938	1.7572e+07	455999	9.9193e+06	62542.6	9.48078e+06	1.16739e+07	8.84621e+06	119329	100476	120763	72014.7	91705	2.93266e+06	2.74013e+06	256412	220244	116113	1.52812e+07	1.6724e+06	505481	1.03998e+07	215062	74723.1	73684.3	122831	163912	66208.6	79083.2	1.01753e+06	513773	812545	84957.4	125746	8.69415e+06	1.96008e+06	4.76752e+06
pos-3.656_388.16384	189314	726399	1.48813e+06	364593	917856	497612	268193	577422	2.22967e+06	337126	202523	1.20264e+06	240465	100941	347022	726493	229845	96267.2	137547	284226	666073	185984	1.18411e+06	1.13836e+06	231325	1.27252e+06	519823	604993	450961	557437	456703	626951	420634	83413.1	591445	153777	2.71823e+06	117917	433170	497330	281536	193057	2.33986e+06	801693	1.78801e+06	871404	235062	174440	332718
pos-3.678_602.2738	393073	127971	125963	3.51742e+06	123935	711902	1.49242e+07	1.89438e+06	121722	129157	158515	315109	111253	9.15496e+06	223943	4.61649e+06	99979.7	2.64753e+06	1.18193e+07	430552	164999	141134	154333	183391	131304	1.92298e+06	1.31563e+06	135844	120584	87285.9	7.99689e+06	282592	131508	6.42974e+06	84215.3	81968.6	113441	101134	123080	95535.8	98862.2	93377.3	96649.6	285713	113106	1.08174e+06	5.53633e+06	313304	253383
pos-3.679_239.0796	574088	1.60799e+06	1.25782e+06	1.8314e+06	784157	1.22094e+06	771812	812315	8.94164e+06	1.67496e+06	827400	1.74521e+06	1.71184e+06	358924	926451	1.71008e+06	1.10912e+06	2.82891e+06	1.8103e+06	1.72469e+06	3.56678e+06	1.32691e+06	756486	588533	1.24888e+06	1.42794e+06	1.20034e+07	934494	723378	1.27922e+06	488636	4.10529e+06	565561	1.00092e+06	550778	951077	984143	532748	483269	920649	675754	934728	5.21342e+06	5.8992e+06	896038	1.02404e+06	1.12704e+06	536513	1.30735e+06
pos-3.684_370.17416	3.93408e+06	3.26906e+06	7.03006e+06	9.98646e+06	2.85103e+06	4.69366e+06	3.95331e+06	1.08399e+07	1.03992e+07	1.57328e+07	2.87488e+06	5.05085e+06	2.20182e+06	6.68041e+06	4.75886e+06	4.62583e+06	5.32275e+06	5.56071e+06	1.73313e+06	1.76041e+06	4.3711e+06	4.18717e+06	8.12017e+06	5.18097e+06	1.01552e+07	7.62133e+06	2.9677e+06	3.89609e+06	2.45758e+07	9.42024e+06	5.67566e+06	2.71766e+06	2.64893e+06	4.09456e+06	6.61974e+06	1.45942e+06	5.13749e+06	2.05608e+06	7.20337e+06	356311	814090	5.35594e+06	1.50412e+06	999710	5.81924e+06	4.50847e+06	2.27778e+06	4.14314e+06	1.58594e+07
pos-3.685_235.08465	1.96657e+06	5.63865e+06	1.71746e+07	8.18461e+06	1.84742e+06	4.1171e+06	4.23999e+06	4.60124e+06	5.72326e+06	2.06463e+06	1.41852e+06	1.5623e+06	1.72413e+06	1.11973e+06	1.04754e+06	1.08725e+07	1.18896e+06	6.85631e+06	9.02348e+06	2.60214e+06	1.04581e+07	3.84951e+06	7.18004e+06	3.775e+06	5.2084e+06	2.60681e+06	8.91011e+06	1.35995e+06	4.57645e+06	3.95313e+06	6.75712e+06	4.26445e+06	2.7438e+07	1.7901e+06	3.28906e+06	1.91458e+06	3.47835e+06	5.40067e+06	1.39799e+06	1.81293e+06	2.42642e+06	5.1569e+06	3.42545e+06	8.83339e+06	3.63283e+06	3.09577e+06	2.70739e+06	1.38046e+07	1.79259e+07
pos-3.686_352.16348	1.63372e+06	3.21799e+06	7.47104e+06	8.71563e+06	2.78987e+06	5.09952e+06	3.08691e+06	1.0574e+07	6.32616e+06	1.53582e+07	2.63874e+06	4.85498e+06	2.06867e+06	6.48137e+06	4.43988e+06	3.78502e+06	5.14466e+06	5.34882e+06	1.27627e+06	1.17413e+06	2.38903e+06	1.19508e+06	7.90734e+06	4.7165e+06	9.69683e+06	6.69583e+06	2.02358e+06	3.57841e+06	5.7298e+06	9.1807e+06	4.88709e+06	2.30248e+06	2.86641e+06	5.17057e+06	6.23995e+06	1.02693e+06	3.63161e+06	265484	6.75391e+06	1.30071e+06	734639	5.00729e+06	929756	307619	4.49112e+06	2.97821e+06	1.81133e+06	3.81499e+06	1.49699e+07
pos-3.688_407.23111	824587	244354	234412	306065	246190	300718	1.11455e+06	191953	373929	556838	506739	768734	407920	144980	625977	212239	733188	138629	784226	634340	1.29321e+06	1.39291e+06	169225	576231	762564	138603	247807	148952	183371	789876	138146	264335	416475	190585	469365	177166	809591	826634	191069	350910	470511	256679	259331	627487	307761	385498	260299	485822	438017
pos-3.7_416.20968	1.31168e+06	2.17438e+06	1.8777e+07	953624	563391	1.20882e+07	5.95715e+07	1.0438e+07	8.8753e+06	528738	644730	644997	676220	6.85426e+07	4.38312e+06	3.86676e+07	459531	3.13062e+07	2.13804e+07	4.01729e+07	1.01892e+06	2.57275e+06	237428	1.45202e+07	1.84652e+06	2.98915e+07	2.63518e+07	4.46424e+06	2.19964e+06	483604	2.97837e+07	1.75693e+06	815622	2.73315e+07	4.5528e+06	1.77935e+06	3.13459e+06	7.28958e+06	491108	491851	1.1404e+06	1.88233e+07	2.64562e+07	1.21877e+06	597996	1.0261e+07	4.83761e+06	2.12581e+06	1.47438e+07
pos-3.702_282.23103	245267	344573	193672	219474	209723	503016	168723	190036	190560	5.587e+06	2.80106e+07	217589	139545	198617	397345	147896	152494	187675	5.73192e+06	196166	258962	619655	234337	162029	322228	633419	214364	406974	184777	164122	205755	3.16942e+06	211382	160114	151378	359159	179257	151271	173195	141364	256458	690129	163571	1.38026e+06	195607	277720	196509	215586	213421
pos-3.703_249.17306	330564	2.19912e+06	188620	1.22434e+06	159847	1.04091e+06	591160	729170	1.69663e+06	791956	592394	1.34769e+06	197585	233679	252923	747193	382789	595615	628477	516911	7.10445e+06	1.5236e+06	170541	242661	726592	713584	110061	229253	390232	496398	543509	1.29488e+06	442785	453859	470192	480339	271042	515228	219507	497360	903702	270405	1.24547e+06	624723	247616	400170	185686	281713	743911
pos-3.712_312.06333	402421	257809	246177	288264	345644	391248	285080	866101	303122	3.93956e+06	474230	285789	3.44181e+07	245695	159488	555879	188614	434048	12734769	317705	830331	329549	289866	255611	243184	253387	615252	232536	242692	1.09439e+06	312392	241556	298269	516936	340595	323650	743521	652883	227480	1.2633e+06	272428	189905	332727	341466	361807	360213	277193	247365	721073
pos-3.717_295.1249	758316	1.8713e+06	3.89789e+06	1.82256e+06	311300	323872	1.69897e+06	371144	3.59606e+06	5.01627e+07	1.28429e+06	1.76235e+06	2.95903e+06	113007	695440	871782	267321	9.00796e+06	344519	4.1229e+06	4.77893e+07	1.81699e+06	133323	308126	1.19926e+07	236040	115447	187835	707238	5.80832e+07	161040	1.27118e+06	747588	888961	190898	5.35385e+06	1.57053e+06	654540	187134	141959	184019	145997	489589	4.93601e+06	1.13147e+06	603267	502623	543519	4.88334e+06
pos-3.729_193.14688	283288	238928	153351	107345	120195	105816	151487	259937	141932	3.53521e+06	167017	327343	114515	103150	129147	189545	203822	189590	1.58491e+06	481920	7.23035e+06	4.63776e+06	289774	132598	298059	567553	92817.4	140836	190401	120916	236390	6.42045e+06	245997	261991	349882	308837	205195	235084	208399	156418	219705	303699	3.63915e+06	143010	1.43406e+06	259701	120125	193526	153430
pos-3.731_338.148	808021	3.64538e+06	1.33842e+06	1.64737e+07	3.68011e+06	4.83178e+06	3.30258e+06	9.72078e+06	4.35397e+06	2.05058e+07	2.68994e+06	1.91372e+07	2.24328e+06	5.90511e+06	2.05975e+06	7.17974e+06	2.15019e+06	9.62257e+06	1.36859e+06	4.26612e+06	1.2596e+07	8.78466e+06	2.24777e+06	6.43821e+06	1.10306e+07	9.07465e+06	2.90691e+06	5.12008e+06	8.69195e+06	1.90094e+07	2.34599e+06	5.94052e+06	2.45445e+06	1.9484e+06	2.02036e+06	1.86927e+06	3.9417e+06	2.86786e+06	5.5746e+06	3.19195e+06	1.20661e+07	2.39792e+06	2.42165e+06	6.31547e+06	3.20483e+06	5.72796e+06	3.41122e+06	3.54319e+06	3.13545e+06
pos-3.731_676.29514	831681	2.26817e+06	385707	1.24303e+07	1.04506e+06	4.11734e+06	746162	1.5437e+06	5.69289e+06	2.33539e+07	1.41703e+06	1.7105e+06	668380	4.69964e+06	2.34174e+06	4.09387e+06	4.40383e+06	6.60601e+06	872462	1.37462e+06	2.402e+06	1.28253e+06	3.11461e+06	6.75753e+06	5.95996e+06	6.25012e+06	1.35336e+06	1.52881e+06	8.83146e+06	1.59316e+07	2.49037e+06	2.3435e+06	2.06017e+06	1.64066e+06	660828	1.05943e+06	2.13061e+06	897945	2.51884e+06	1.32232e+06	1.54456e+06	1.74962e+06	1.79032e+06	3.29534e+06	4.65224e+06	2.45616e+06	950188	1.63788e+06	1.19182e+07
pos-3.732_640.38403	371921	601458	1.07281e+06	849619	1.02414e+06	1.75845e+06	425836	2.19632e+06	735591	6.52399e+06	748117	4.63826e+06	407774	178016	2.71493e+06	919496	577678	2.66133e+06	465884	3.50306e+06	2.61645e+06	842227	3.47949e+06	1.33839e+06	1.13261e+06	1.7264e+06	703983	3.92775e+06	906191	1.85415e+06	295471	1.01919e+07	504190	1.25149e+06	307162	448815	225037	7.18604e+06	2.68298e+06	2.05348e+06	2.41515e+06	1.48151e+06	2.03997e+06	1.50483e+06	1.78718e+06	455270	2.15112e+06	1.59997e+06	927954
pos-3.732_828.434	226082	187280	162336	357193	197514	174133	154295	1.91911e+06	1.43127e+06	1.19778e+06	318089	4.76432e+06	138655	830954	483046	3.576e+06	558254	740853	1.19039e+06	2.63466e+06	1.89121e+06	2.30867e+06	215005	130365	170782	152863	1.26837e+07	276629	972323	162962	181999	3.27887e+06	379030	133624	2.19934e+06	3.99125e+06	781681	2.19638e+06	133828	1.33174e+06	1.18706e+06	696714	201867	2.28003e+06	3.522e+06	414274	190560	430822	603915
pos-3.733_220.0373	121657	205660	87354.9	98519	3.41746e+06	4.98455e+06	84655	68112.4	560368	89087.7	2.0757e+06	116678	4.2929e+06	74160.4	531163	5.06192e+06	111768	88225.2	2.38357e+06	258678	123519	228951	115696	70151	91899.6	82257.2	5.55872e+06	83230.5	85786.2	875419	97935.7	772291	97082.4	71904.3	377356	71601.8	119013	1.52563e+06	72014.1	73804.2	95871.2	69287.7	77826.9	483428	95582.7	139820	102542	85407.9	147086
pos-3.735_588.3364	298155	576327	218390	258364	275117	516273	295634	1.12939e+06	2.15062e+06	1.07711e+06	1.35664e+06	1.26393e+06	267738	2.19867e+06	292979	1.27163e+06	677783	594967	775530	598181	2.67183e+06	317331	279444	350557	513517	429279	1.31063e+07	441822	522635	168413	260483	5.4725e+06	488456	173672	3.10999e+06	3.35936e+06	456250	498871	183336	1.64253e+06	4.04953e+06	2.20156e+06	215249	3.20809e+06	3.85125e+06	675049	247672	307551	341713
pos-3.737_1176.67259	170364	127498	124787	147628	128942	305544	116833	505261	956862	589700	763227	701734	102972	664955	113319	743029	144593	153762	336271	380616	2.0711e+06	181321	180109	176269	374657	195116	5.983e+06	190505	182068	96230.3	148839	2.53026e+06	259746	99235.5	967214	1.98171e+06	234157	158558	104758	587154	2.12977e+06	681138	107409	1.44262e+06	1.39175e+06	192967	141519	171610	268437
pos-3.738_336.14764	775010	6.1726e+06	212452	7.66733e+06	747526	1.9943e+06	308830	1.33229e+06	3.87063e+06	1.18037e+07	859335	1.52603e+06	568287	3.11522e+06	429534	3.68196e+06	3.05264e+06	5.48739e+06	826898	906575	1.24928e+06	838143	1.64613e+06	5.77302e+06	2.22392e+06	4.2956e+06	907993	295539	3.26165e+06	1.58961e+07	4.62679e+06	360079	826961	1.44922e+06	672094	1.25921e+06	1.82964e+06	381412	1.21537e+06	132841	447016	1.53301e+06	1.22644e+06	3.32819e+06	3.77176e+06	1.93161e+06	1.01434e+06	1.64366e+06	1.87637e+06
pos-3.745_156.05747	288222	248060	602559	375399	737589	335801	221243	304964	247403	1.39676e+06	505134	1.13398e+07	451035	501960	365564	439382	192664	278660	197489	257848	411230	983844	629220	257237	378256	264314	549250	303324	212936	760198	216432	489732	591834	206779	460310	228818	252165	348495	230189	319806	384080	513803	516044	234432	464830	317278	357064	198674	1.50405e+06
pos-3.745_627.37602	308240	237786	171262	220457	180692	219172	144956	1.33935e+06	1.5361e+06	893961	789191	926307	145165	2.36808e+06	121977	1.29098e+06	738430	1.92795e+06	747114	544101	2.01743e+06	242392	266009	219555	262069	445727	9.49434e+06	466537	310203	176835	192620	4.0766e+06	190883	271879	2.35234e+06	2.55462e+06	249069	611682	137894	1.08578e+06	2.60038e+06	1.64011e+06	144431	2.47644e+06	2.71264e+06	449783	191534	699368	323360
pos-3.746_297.12128	1.67754e+06	3.02079e+06	2.47912e+07	9.69101e+06	824276	3.83125e+06	770809	2.34192e+06	7.44079e+06	9.04415e+07	2.34661e+06	3.32084e+06	5.80138e+06	4.84295e+06	1.58841e+06	5.9858e+06	3.05301e+06	1.73983e+07	1.28233e+06	3.7486e+06	6.39865e+07	4.71954e+06	3.64582e+06	1.08089e+07	1.63371e+07	1.02887e+07	3.66563e+06	1.84614e+06	7.32335e+06	9.03303e+07	1.87597e+06	2.87444e+06	2.05763e+06	2.37828e+06	1.25367e+06	9.8882e+06	4.49347e+06	1.64443e+06	2.28156e+06	1.17771e+06	2.24061e+06	3.94725e+06	2.02995e+06	1.13773e+07	1.8726e+06	3.51342e+06	1.71334e+06	1.90699e+06	2.59178e+06
pos-3.748_850.4781	1.10275e+06	731423	1.57913e+06	1.30285e+06	586085	875158	644386	4.51049e+06	5.33093e+06	2.99671e+06	1.43359e+06	8.63422e+06	391680	2.2339e+06	1.8761e+06	1.10389e+07	1.734e+06	839091	3.12679e+06	7.51491e+06	5.83975e+06	1.05155e+06	746800	501559	936446	1.15123e+06	5.31641e+07	1.2633e+06	2.24207e+06	650962	1.3008e+06	6.29661e+06	2.56036e+06	584078	5.28786e+06	1.19124e+07	2.25703e+06	1.81915e+06	1.0322e+06	3.82551e+06	3.35934e+06	2.63299e+06	532754	7.63733e+06	8.67506e+06	1.08645e+06	900468	1.26329e+06	1.61755e+06
pos-3.751_425.23935	784193	538405	794480	948002	449060	826089	395093	4.95579e+06	5.25413e+06	2.86252e+06	757881	7.86927e+06	299506	3.10842e+06	1.60255e+06	1.0217e+07	2489196	795915	3.01144e+06	6.56545e+06	4.32969e+06	854938	788989	367533	757190	1.56562e+06	5.85566e+07	1.1911e+06	3.03828e+06	512414	484942	6.47514e+06	1.13001e+06	342455	5.28775e+06	1.13713e+07	1.81437e+06	1.55032e+06	418220	4.06161e+06	4.29093e+06	2.95424e+06	536645	6.94797e+06	6.77754e+06	743734	1.47794e+07	476882	943493
pos-3.751_433.75269	3.53546e+06	978031	235605	409819	154774	333316	282769	1.81603e+06	2.61334e+06	790987	597079	2.92117e+06	159963	1.04834e+06	629306	4.43868e+06	1.25103e+06	319420	1.82809e+06	3.24295e+06	1.98586e+06	258578	293125	179213	345354	5.85366e+06	2.35058e+07	1.52386e+07	906682	671647	212255	2.57453e+06	971900	151818	2.49348e+06	4.67709e+06	1.2552e+06	1.3262e+06	415462	1.90361e+06	1.169e+06	1.18503e+06	431534	2.86824e+06	3.68516e+06	1.93339e+06	754377	850763	903923
pos-3.751_610.34892	187790	294333	142809	178354	138944	130362	117272	684407	589078	207525	456571	263087	117441	900326	121241	786011	216600	177331	490426	241482	715547	196100	215207	125005	154786	138258	8.82963e+06	216410	532887	127962	155833	647056	200453	107119	1.3908e+06	2.39897e+06	484325	119996	118744	389688	658542	573928	116848	1.54976e+06	1.74098e+06	206647	154955	143047	266139
pos-3.754_374.24035	139653	2.16969e+06	562883	1.38786e+06	362241	1.63568e+06	99200.2	202111	93535	267458	1.39879e+06	225735	94047	268873	191987	1.21061e+06	154262	318176	95855.3	1.26487e+06	168402	145832	668247	356958	287064	8.95184e+06	105707	200330	93204.3	251714	2.55211e+06	1.04703e+06	527617	175786	90718.2	160507	342087	921024	95345.9	111380	174117	3.99976e+06	691479	170295	371347	417219	1.26023e+06	151123	460467
[truncated: 671 more rows]
[truncated: 68 more columns]
